# Supplementary material for: An Eggplant Recombinant Inbred Population Allows the Discovery of Metabolic QTLs Controlling Fruit Nutritional Quality
Source: Front Plant Sci. 2021 May 17;12:638195. doi: 10.3389/fpls.2021.638195 (PMC8166230; doi:10.3389/fpls.2021.638195)
Supplement: Supplementary file 2 [file Data_Sheet_1.xlsx]

## Sheet: S1
Supplementary Table S1 Metabolites identified in eggplant flesh (F) and pell (P) fruit extracts. Identification level (A) confirmed by reference standard; (B) tentative by MS/MS; (C) accurate mass and isotopic pattern.
RT (min)	Tissue	Measured mass (m/z)	Formula	Adduct	Identification	Monoisotopic mass	Kegg entry	Expected mass (m/z)	Δppm	MS2 fragments (m/z)	Reference	Identification level
1.1	P	138.055	C7H7NO2	[M+H]+	trigonelline	137.048	C01004	138.055	-0.724	121.01, 94.10, 138.10	Li et al.. 2018	B
1.1	P	146.118	C7H16NO2	[M]+	acetylcholine	146.118	C01996	146.118	0.545			A
1.2	F/P	470.229	C25H31N3O6	[M+H]+	n,n'-dicaffeoylspermidine	469.221	-	470.228	1.207		Wu et al. 2013	C
1.5	P	235.144	C13H18N2O2	[M+H]+	p-coumaroylputrescine	234.137	C18326	235.144	0.85			C
1.2	P	147.076	C5H10N2O3	[M+H]+	glutamine	146.069	C00064	147.076	-0.079			A
1.3	P	472.245	C25H31N3O6	[M+H]+	n-dihydrocaffeoyl-n'-caffeospermidine	471.236	-	472.244	0.538		Wu et al. 2013	C
1.8	P	121.065	C8H8O	[M+H]+	unknown		-	121.065	0.159			C
3.1	P	251.139	C13H18N2O3	[M+H]+	n-caffeoylputrescine	250.132	C03002	251.139	-0.836	234.11, 163.06, 89.13	Baumert et al. 2001	B
5.6	P	611.161	C27H31O16	[M]+	delphinidin-3-rutinoside	611.161	C16315	611.161	-0.491	303.05, 611.16, 465.10, 495.01		A
6.8	F/P	470.229	C25H31N3O6	[M+H]+	n,n'-dicaffeoylspermidine iso	469.221	-	470.228	0.102		Wu et al. 2013	C
8.6	P	611.161	C27H30O16	[M+H]+	kaempferol 3-O-beta-D-sophoroside	610.153	C12634	611.161	0.802	287.06, 449.10, 431.10		B
8.1	P	919.252	C42H47O23	[M]+	nasunin (or delphinidin-3-(p-coumaroyl)-rutinoside-5-glucoside)	919.251	C16294	919.251	1.936	757.13, 465.10, 303.07	Ichiyanagi et al. 2005	B
8.9	P	611.161	C27H30O16	[M+H]+	rutin	610.153	C05625	611.1607	0.491	303.06, 465.02, 449.03		A
10.2	F	884.5	C45H73O16N	[M+H]+	solasonine	883.493	C10824	884.5	-0.119	866.49, 738.44, 704.44, 414.34, 396.32, 378.31	Lelario et al.. 2019	B
10.1	P	449.108	C21H20O11	[M+H]+	kaempferol-3-O-D-glucoside	448.101	C12249	449.108	0.142	287.04		A
10.3	F	868.504	C45H73O15N	[M+H]+	solamargine	867.498	C10819	868.505	-1.112	850.49, 704.43, 576.38, 396.32, 253.19	Lelario et al.. 2019	B
10.4	F	1000.55	C50H83NO20	[M+H-H2O]+	demissine	1017.55	C10803	1000.55	0.599			C
11	P	773.193	C36H37O19	[M]+	delphinidin 3-O-D-glucoside-5-(6-coumaroyl-D-glucoside)	773.193	C16351	773.193	1.185	319.04, 293.10, 481.09, 611.14, 755.18		B
11.7	F	954.505	C48H75O18N	[M+H]+	malonyl-solamargine	953.498	-	954.505	0.161	910.51, 892.50, 764.46, 722.45, 576.39, 414.34, 396.32,378.31	Lelario et al.. 2019	B
12.2	F/P	1031.54	C51H82O21	[M+H]+	pseudoprotodioscin	1030.53	C17469	1031.54	-0.325	869.48, 415.32, 577.37, 723.43		B

## Sheet: S2
Supplementary Table S2 Relative levels of DA metabolites measured by LC/ESI/MS in flesh extracts of the RIL population. Metabolite levels are expressed as AVG and St dev of fold ISTD (internal standard, formononetin) from 2 biological replicates. nd: not detectable.
		pseudoprotodioscin	solamargine	malonyl-solamargine	n,n'-dicaffeoylspermidine	n,n'-dicaffeoylspermidine_iso	demissine	solasonine
F_1	avg	0.086122	0.009598	0.00797	0.1402	0.067388	0.000102	0.006501
	st dev	0.010597	0.000904	0.002998	0.025258	0.010975	4.2e-05	0.000962
F_2	avg	0.129724	0.012029	0.009098	0.433808	0.206701	0.001064	0.005711
	st dev	0.000896	0.002358	0.003497	0.030261	0.040671	0.000428	0.001453
F_3	avg	0.215338	0.95549	0.543507	0.053425	0.05812	0.018184	0.590684
	st dev	0.075088	0.049474	0.057263	0.016099	0.021901	0.002688	0.127048
F_4	avg	0.221635	0.012713	0.019401	0.101521	0.153257	0.000281	0.005759
	st dev	0.078281	0.000679	0.00032	0.026186	0.056492	0.000111	0.000425
F_5	avg	0.122217	0.117371	0.084799	0.256381	0.115915	0.009685	0.035462
	st dev	0.013979	0.002372	0.021451	0.008605	0.005313	0.001007	0.008684
F_6	avg	0.202351	0.059673	0.035162	0.01474	0.00671	0.00314	0.025827
	st dev	0.05481	0.017517	0.011367	0.00284	0.001451	0.001279	0.002402
F_7	avg	0.060524	0.016684	0.008678	0.112093	0.057661	5.6e-05	0.006481
	st dev	0.012093	0.000503	0.00077	0.030622	0.017861	1e-05	0.001524
F_8	avg	0.153418	0.009094	0.025893	0.185221	0.080789	0.000201	0.005112
	st dev	0.014411	0.002267	0.006303	0.036059	0.009806	3.1e-05	0.001758
F_9	avg	0.0369	0.034342	0.041324	0.099805	0.046436	0.000258	0.026493
	st dev	0.005071	0.010221	0.008973	0.027573	0.015727	3e-05	0.006293
F_10	avg	0.201984	0.639822	0.395972	0.086465	0.036824	0.009287	0.298461
	st dev	0.009109	0.233522	0.133478	0.011879	0.000149	0.002653	0.112157
F_11	avg	0.069823	0.005765	0.020335	0.164976	0.085098	0.00078	0.004389
	st dev	0.022741	0.000198	0.005711	0.013506	0.005094	0.000122	2.1e-05
F_12	avg	0.066948	0.12689	0.072264	0.063198	0.046773	0.001249	0.036249
	st dev	0.003129	0.024337	0.013041	0.018335	0.015314	3.2e-05	0.012298
F_13	avg	0.060267	0.004774	0.014821	0.065109	0.033325	0.001537	0.003944
	st dev	0.025552	0.001519	0.006489	0.019094	0.006023	0.000476	0.001382
F_14	avg	0.06634	0.01641	0.028817	0.010639	0.005292	0.000227	0.008377
	st dev	0.033879	0.00767	0.006368	0.001541	0.000698	4e-06	0.003784
F_16	avg	0.127354	0.010884	nd	0.167181	0.085211	7.9e-05	0.006071
	st dev	0.034321	0.003692		0.07351	0.031761	2.9e-05	0.001978
F_17	avg	0.071231	0.005388	0.002922	0.276343	0.140204	0.000441	0.001983
	st dev	0.003547	0.000477	0.000374	0.059154	0.024304	4e-05	0.000272
F_18	avg	0.046514	0.003569	0.003672	0.010649	0.003721	0.000735	0.002264
	st dev	0.016407	0.001027	0.000952	0.000278	0.000712	8.7e-05	0.00041
F_19	avg	0.116464	0.024886	0.024713	0.212527	0.099444	0.00323	0.011896
	st dev	0.006535	0.002301	0.001086	0.099674	0.046907	0.000536	0.000625
F_20	avg	0.118039	0.01187	0.011291	0.181914	0.116223	nd	0.004165
	st dev	0.042017	0.000751	0.00663	0.099193	0.057174		0.002181
F_21	avg	0.207619	0.11842	0.106272	0.225115	0.108271	0.004796	0.067585
	st dev	0.018103	0.005714	0.005487	0.090229	0.041961	0.0057	0.008744
F_22	avg	0.069549	0.016569	0.023276	0.032699	0.012412	0.003614	0.015613
	st dev	0.001781	0.003764	0.001798	0.010483	0.007064	0.000223	0.000514
F_23	avg	0.123231	0.265304	0.132657	0.307568	0.152294	0.000935	0.085584
	st dev	0.045044	0.073039	0.033376	0.06489	0.02603	0.000266	0.03386
F_25	avg	0.162015	0.115126	0.091853	0.021854	0.011912	0.000152	0.07018
	st dev	0.037421	0.030443	0.007745	0.010304	0.005123	7.1e-05	0.02797
F_26	avg	0.18764	0.416714	0.227974	0.13936	0.08172	0.018495	0.145088
	st dev	0.028228	0.000366	0.03204	0.072013	0.035777	0.005375	0.017732
F_27	avg	0.084766	0.048642	0.053174	0.04437	0.022602	0.005214	0.038335
	st dev	0.030643	0.015025	0.03173	0.006948	0.00792	0.001645	0.019793
F_28	avg	0.172049	0.240892	0.157983	0.075704	0.038258	0.015174	0.124654
	st dev	0.083231	0.086249	0.00522	0.030666	0.017147	0.007685	0.050603
F_30	avg	0.152527	0.225755	0.115615	0.270905	0.150373	0.010955	0.076809
	st dev	0.009942	0.055115	0.003924	0.036627	0.011298	0.001094	0.015439
F_31	avg	0.147691	0.534371	0.444187	0.10433	0.052712	0.017883	0.273385
	st dev	0.034551	0.179072	0.0799	0.040321	0.019394	0.002974	0.112741
F_32	avg	0.187146	0.229126	0.064065	0.265682	0.140007	nd	nd
	st dev	0.080065	0.031044	0.006804	0.063804	0.030288
F_33	avg	0.128409	0.008833	0.009763	0.251416	0.234727	0.000738	0.004195
	st dev	0.053561	0.000521	0.005388	0.118734	0.096366	0.000264	0.001142
F_34	avg	0.171616	0.218191	0.166197	0.065905	0.033045	0.007866	0.119552
	st dev	0.049718	0.048409	0.042598	0.009967	0.000977	0.002067	0.0089
F_35	avg	0.308526	1.6953	0.793835	0.04584	0.044331	0.032631	0.8173
	st dev	0.088542	0.333162	0.049169	0.019493	0.018208	0.00573	0.195623
F_36	avg	0.089612	0.052414	0.125349	0.023289	0.011326	0.007904	0.039958
	st dev	0.002581	0.000962	0.045569	0.001554	6.5e-05	0.000586	0.003848
F_37	avg	0.147631	0.011566	0.011082	0.047521	0.052266	0.002426	0.005193
	st dev	0.016465	0.001085	0.000722	0.002889	0.005571	0.000244	0.000396
F_38	avg	0.11706	0.330233	0.25358	0.232743	0.128794	0.000683	0.200884
	st dev	0.056351	0.141571	0.036503	0.071493	0.034088	0.000109	0.055096
F_39	avg	0.13044	0.241381	0.141532	0.053156	0.027227	0.000649	0.037126
	st dev	0.045776	0.133078	0.038735	0.011693	0.007165	0.000193	0.021964
F_40	avg	0.164662	0.136023	0.07122	0.201153	0.117999	0.004288	0.079067
	st dev	0.046795	0.003639	0.009025	0.060419	0.039997	0.000246	0.004537
F_41	avg	0.054573	0.003043	0.006108	0.035895	0.016206	0.000346	0.002187
	st dev	0.018087	0.001019	0.001725	0.009688	0.004685	8.9e-05	0.000758
F_42	avg	0.140653	0.204521	0.118038	0.476892	0.220013	0.00501	0.061081
	st dev	0.013071	0.043684	0.03243	0.015085	0.015207	0.001883	0.023057
F_43	avg	0.068628	0.035871	0.039069	0.238619	0.118628	0.000295	0.012275
	st dev	0.002796	0.003321	0.014156	0.0625	0.043217	9e-06	0.007962
F_44	avg	0.272812	0.074905	0.050979	0.075066	0.038129	0.004907	0.051426
	st dev	0.04612	0.016231	0.019676	0.037927	0.013232	0.001803	0.020119
F_45	avg	0.085031	0.022981	0.091569	0.026841	0.011906	0.001789	0.015223
	st dev	0.023333	0.004864	0.032117	0.006146	0.002643	0.00013	0.010055
F_46	avg	0.097337	0.120721	0.108277	0.321307	0.142191	0.000499	0.049055
	st dev	0.004908	0.007818	0.047316	0.079376	0.03652	7.4e-05	0.011739
F_47	avg	0.043333	0.006587	0.012292	0.217862	0.088807	0.001605	0.004664
	st dev	0.028169	0.000974	0.001894	1.5e-05	0.021628	0.000343	0.000356
F_48	avg	0.039578	0.128698	0.096132	0.131471	0.052061	0.010548	0.076314
	st dev	0.007135	0.019076	0.026266	0.0099	0.000521	0.003161	0.010393
F_49	avg	0.074299	0.056712	0.04009	0.197253	0.093376	0.001748	0.024957
	st dev	0.015528	0.003802	0.024786	0.03921	0.017127	0.000793	0.001771
F_50	avg	0.33828	2.80755	1.41892	0.323813	0.15254	0.035484	1.2483
	st dev	0.176728	1.26527	0.531225	0.144797	0.07356	0.003347	0.266081
F_51	avg	0.069945	0.026016	0.030216	0.039724	0.020283	0.000161	0.009471
	st dev	0.011849	0.003614	0.005599	0.003633	0.001853	2.2e-05	0.000473
F_52	avg	0.072003	0.156949	0.090151	0.373405	0.190399	0.005621	0.071558
	st dev	0.001691	0.001555	0.024095	0.063461	0.042577	0.000647	0.008935
F_54	avg	0.072588	0.079517	0.121029	0.022505	0.01113	0.000565	0.042305
	st dev	0.017924	0.012537	0.015458	0.001495	0.000811	0.00018	0.005645
F_55	avg	0.069892	0.057672	0.067684	0.021324	0.011511	0.00385	0.038267
	st dev	0.005174	0.004344	0.025712	0.010933	0.003269	0.001237	0.016163
F_56	avg	0.060384	0.235425	0.165194	0.041479	0.02838	0.000669	0.1183
	st dev	0.006621	0.031896	0.030105	0.014868	0.00695	0.000172	0.009751
F_57	avg	0.036723	0.006408	0.008086	0.011524	0.005466	0.000435	0.004718
	st dev	0.004015	0.001802	0.002373	0.00105	0.000888	0.000101	0.001154
F_58	avg	0.215366	0.125046	0.093699	0.077465	0.038796	0.010574	0.070981
	st dev	0.129597	0.018608	0.008236	0.003056	0.00017	0.001719	0.029602
F_59	avg	0.056241	0.013274	0.021949	0.042972	0.024875	7.3e-05	0.005693
	st dev	0.029743	0.001218	0.001846	0.006878	0.006796	3.2e-05	0.000391
F_60	avg	0.116324	0.002056	0.002746	0.020408	0.009269	0.000259	0.00118
	st dev	0.017824	0.000486	0.000131	0.005518	0.004779	2.4e-05	0.000343
F_61	avg	0.011721	0.013083	0.023621	0.002833	0.001289	0.00212	0.008058
	st dev	0.005187	0.006435	0.008494	0.0001	0.000202	0.000486	0.004446
F_61B	avg	0.035313	0.030781	0.052683	0.003076	0.003327	0.001968	0.023749
	st dev	0.014453	0.007715	0.001234	0.000297	0.000222	0.000385	0.002266
F_62	avg	0.158783	0.643402	0.454246	0.013934	0.008197	0.022264	0.362563
	st dev	0.033573	0.035419	0.011857	0.00087	0.000414	0.005642	0.040437
F_63	avg	0.057243	0.017182	0.022421	0.259268	0.117287	0.002332	0.016618
	st dev	0.009856	0.009067	0.003644	0.033327	0.022185	0.000502	0.006165
F_64	avg	0.20749	0.017013	0.012366	0.335984	0.057795	nd	0.005093
	st dev	0.051733	0.003323	0.001278	0.193888	0.003808		0.000286
F_65	avg	0.119911	0.938556	0.648764	0.0113	0.006074	0.013856	0.616515
	st dev	0.000556	0.390175	0.269915	0.00108	0.000257	0.002759	0.102348
F_66	avg	0.147622	0.107961	0.102603	0.352967	0.185658	0.000282	0.024261
	st dev	0.04049	0.025173	0.059194	0.052812	0.034881	2.2e-05	0.001992
F_67	avg	0.091568	0.22674	0.203133	0.121827	0.060711	0.00216	0.107881
	st dev	0.042576	0.013462	0.013658	0.000252	0.003394	0.000728	0.007667
F_68	avg	0.185794	0.019453	0.011941	0.423966	0.190587	0.000152	0.006653
	st dev	0.01241	0.007767	0.007715	0.150591	0.071108	8.5e-05	0.001504
F_70	avg	0.159067	0.028595	0.068846	0.003105	0.001851	0.000331	0.015707
	st dev	0.0378	0.00281	0.01244	0.001687	0.000883	0.00012	0.00246
F_71	avg	0.078825	0.046771	0.03073	0.186505	0.0888	0.000518	0.02558
	st dev	0.031182	0.017127	0.01447	0.113709	0.005909	0.000315	0.012523
F_72	avg	0.156345	0.100897	0.066405	0.308193	0.161026	0.002823	0.048416
	st dev	0.047228	0.011084	0.02428	0.013788	0.004284	0.000604	0.006562
F_73	avg	0.079238	0.102759	0.097061	0.042011	0.022674	0.002301	0.070798
	st dev	0.021505	0.009687	0.007014	0.014589	0.006688	0.000258	0.008152
F_74	avg	0.120939	0.032404	0.065542	0.012468	0.005442	0.000138	0.016386
	st dev	0.00474	0.004251	0.008109	0.002503	0.002104	4.5e-05	0.003258
F_75	avg	0.178151	0.294689	0.184832	0.144006	0.148332	0.010778	0.174845
	st dev	0.073798	0.068479	0.004596	0.038689	0.067848	0.000931	0.039913
F_76	avg	0.137823	0.06013	0.041845	0.040179	0.023447	0.003396	0.025548
	st dev	0.01032	0.008015	0.000218	0.011322	0.0084	0.000299	0.008106
F_77	avg	0.196477	0.10878	0.082767	0.084545	0.045767	0.005436	0.039265
	st dev	0.097709	0.041068	0.009353	0.008087	0.004228	0.000812	0.018912
F_78	avg	0.28206	0.117378	0.140094	0.371288	0.24139	0.003969	0.148916
	st dev	0.11741	0.022883	0.041728	0.071748	0.103113	0.001629	0.038868
F_79	avg	0.026463	0.003741	0.004055	0.034463	0.015539	0.000536	0.00229
	st dev	0.001848	0.001319	3.9e-05	0.001511	0.002772	0.000186	0.000485
F_80	avg	0.230025	0.366781	0.206785	0.23419	0.11463	0.001291	0.134076
	st dev	0.023671	0.148527	0.016026	0.052539	0.026688	0.000724	0.06542
F_81	avg	0.049925	0.011821	0.028676	0.02553	0.012704	0.002832	0.007287
	st dev	0.004303	0.00086	0.002608	0.008138	0.001584	0.000724	0.001705
F_82	avg	0.126918	0.003674	0.007088	0.292849	0.139714	nd	0.001528
	st dev	0.054913	0.000328	0.004277	0.001167	0.006889		0.000132
F_83	avg	0.121834	0.124202	0.086728	0.060023	0.030488	0.007139	0.056173
	st dev	0.024102	0.000474	0.003356	0.0182	0.005981	0.000273	0.003243
F_84	avg	0.22705	0.956208	0.548218	0.282839	0.142854	0.003854	0.361838
	st dev	0.127736	0.338814	0.056698	0.105629	0.049492	0.000303	0.084757
F_85	avg	0.14107	0.290464	0.357794	0.010331	0.002376	0.013305	0.132413
	st dev	0.005482	0.043201	0.200106	0.003476	0.000168	0.002297	0.027077
F_86	avg	0.042746	0.007363	0.006657	0.626378	0.301479	4.4e-05	0.002851
	st dev	0.007953	0.000484	0.003182	0.09462	0.053925	1.3e-05	0.001638
F_88	avg	0.068842	0.0215	0.046405	0.031525	0.01807	0.000316	0.012944
	st dev	0.002938	0.007753	0.011328	0.002069	0.001335	8.1e-05	0.004225
F_89	avg	0.034846	0.135112	0.046605	0.064638	0.038976	0.000271	0.019611
	st dev	0.00091	0.049753	0.013577	0.00156	0.00899	2.3e-05	0.001307
F_90	avg	0.083845	0.21378	0.165438	0.05673	0.021385	0.001019	0.147083
	st dev	0.014637	0.107285	0.044325	0.021866	0.005881	4.4e-05	0.092569
F_91	avg	0.092256	0.003648	0.003092	0.053263	0.024026	4.3e-05	0.001286
	st dev	0.007697	0.000646	0.001329	0.019597	0.00969	0	0.000677
F_92	avg	0.053495	0.004848	0.005111	0.006506	0.019929	8.3e-05	0.002194
	st dev	0.003519	0.000428	0.001349	0.002359	0.002534	4e-06	0.00116
F_93	avg	0.109639	0.281338	0.238925	0.389716	0.19341	0.024353	0.187134
	st dev	0.003058	0.105621	0.090909	0.10074	0.008821	0.002552	0.067457
F_94	avg	0.060431	0.030882	0.023412	0.1546	0.121535	0.002236	0.019286
	st dev	0.016455	0.002921	0.01058	0.0566	0.03432	1.7e-05	0.003397
F_95	avg	0.054673	0.083874	0.058196	0.264109	0.122153	0.000203	0.054167
	st dev	0.008962	0.048576	0.032382	0.02181	0.008678	8.4e-05	0.025599
F_96	avg	0.072948	0.241433	0.232374	0.027235	0.014891	0.024106	0.113945
	st dev	0.031948	0.079012	0.024276	0.001804	0.000829	0.007985	0.004807
F_97	avg	0.096458	0.148876	0.112729	0.22707	0.125282	0.000521	0.102916
	st dev	0.016228	0.021792	0.046909	0.035195	0.032624	3.3e-05	0.020292
F_98	avg	0.094168	0.067127	0.056917	0.026792	0.013023	0.003618	0.052082
	st dev	0.032885	0.008576	0.006648	0.012393	0.006301	0.000319	0.006932
F_99	avg	0.157601	0.15416	0.099857	0.1815	0.092678	0.000408	0.047046
	st dev	0.005379	0.031486	0.017736	0.023272	0.006076	3.7e-05	0.001994
F_100	avg	0.247356	0.266792	0.197037	0.048369	0.025198	0.000414	0.116328
	st dev	0.047807	0.05539	0.025982	0.006849	0.007177	0.000184	0.014042
F_101	avg	0.172866	0.228688	0.196789	0.021392	0.019856	0.005601	0.111034
	st dev	0.099773	0.040318	0.093111	0.012709	0.002928	0.002143	0.027646
F_102	avg	0.101468	0.076764	0.062415	0.213509	0.102057	0.000475	0.047557
	st dev	0.050579	0.026279	0.014013	0.095095	0.034027	0.000193	0.027558
F_103	avg	0.167803	0.283111	0.216725	0.166399	0.077562	0.001932	0.116738
	st dev	0.067535	0.148412	0.046132	0.000361	0.011012	0.000727	0.037374
F_104	avg	0.263384	0.583431	0.113443	0.285486	0.127435	0.012213	0.225008
	st dev	0.012163	0.008413	0.041879	0.015291	0.013876	0.001681	0.00672
F_105	avg	0.140979	0.054964	0.070064	0.006686	0.003028	0.006286	0.034446
	st dev	0.043105	0.008295	0.017736	0.00052	0.000365	0.001734	0.012048
F_106	avg	0.018827	0.016794	0.017376	0.005265	0.002274	0.000313	0.00361
	st dev	0.003	0.001978	0.001665	0.001298	0.00058	4.4e-05	0.000645
F_107	avg	0.126225	0.206032	0.109692	0.00885	0.00572	0.005642	0.116534
	st dev	0.010482	0.017397	0.008575	0.000603	0.000486	0.000527	0.009343
F_108	avg	0.069207	0.108745	0.072492	0.016295	0.0084	0.009378	0.047392
	st dev	0.025151	0.039356	0.016428	0.004304	0.001104	0.00714	0.01662
F_110	avg	0.05957	0.005101	0.009723	0.255317	0.13021	0.000124	0.003586
	st dev	0.021477	0.000948	0.002429	0.02096	0.018247	4.7e-05	0.000692
F_111	avg	0.099307	0.180681	0.18023	0.039002	0.020391	0.000449	0.07411
	st dev	0.004081	0.010851	0.049556	0.001809	0.002274	2.5e-05	0.003964
F_112	avg	0.076578	0.001798	0.001791	0.335003	0.176703	nd	0.001437
	st dev	0.02613	0.000192	0.000335	2.3e-05	0.007399		0.000308
F_113	avg	0.033278	0.061021	0.065245	0.016004	0.011009	0.003923	0.031464
	st dev	0.019655	0.02347	0.009946	0.00072	0.004133	0.001285	0.008856
F_114	avg	0.059256	0.062395	0.090203	0.00537	0.003513	0.005127	0.04934
	st dev	0.014949	0.019861	0.008812	4.3e-05	0.001353	0.002306	0.00721
F_115	avg	0.040928	0.023221	0.056029	0.00722	0.002849	0.003701	0.029156
	st dev	0.001884	0.000409	0.022623	0.000664	0.001254	0.000607	0.014182
F_116	avg	0.108573	0.032862	0.030476	0.065012	0.035739	0.003345	0.008726
	st dev	0.059476	0.008208	0.00631	0.028485	0.014432	0.00043	0.002023
F_117	avg	0.061498	0.175031	0.147989	0.029269	0.014406	0.001087	0.064392
	st dev	0.015771	0.004799	0.004777	0.00359	3.4e-05	0.000117	0.002273
F_118	avg	0.122562	0.454121	0.233315	0.099064	0.048608	0.000673	0.138369
	st dev	0.002435	0.009111	0.035397	0.00471	0.005943	0.000146	0.025381
F_119	avg	0.160337	0.214077	0.134665	0.470018	0.19531	0.000366	0.03202
	st dev	0.053328	0.069085	0.057056	0.093962	0.012898	2.8e-05	0.002775
F_119B	avg	0.103259	0.006441	0.021337	0.251049	0.105269	0.000124	0.003864
	st dev	0.030735	0.002256	0.009713	0.076249	0.022689	2e-05	0.001408
F_120	avg	0.130996	0.01571	0.039398	0.29529	0.145333	0.000271	0.010216
	st dev	0.009101	0.001431	0.003276	0.026955	0.007383	2e-05	0.000911
F_121	avg	0.091284	0.190862	0.103126	0.248087	0.152986	0.010432	0.063217
	st dev	0.021858	0.041784	0.002182	0.000915	0.016266	0.000373	0.015865
F_122	avg	0.02681	0.047621	0.067806	0.008108	0.003928	0.00571	0.019016
	st dev	0.01355	0.008077	0.000474	0.003404	0.001307	0.000353	0.002351
F_123	avg	0.175724	0.195124	0.201767	0.142262	0.154713	0.016938	0.079055
	st dev	0.039985	0.107087	0.100441	0.037644	0.043075	0.003224	0.02774
F_124	avg	0.125364	0.323066	0.241121	0.053375	0.028074	0.016535	0.19308
	st dev	0.046664	0.039965	0.051702	0.016245	0.006172	0.006795	0.04481
F_125	avg	0.159277	0.46033	0.245239	0.039368	0.021853	0.000989	0.263527
	st dev	0.059444	0.220769	0.022309	0.002872	0.015051	0.000187	0.082237
F_126	avg	0.232121	0.077153	0.049403	0.402195	0.187304	0.006948	0.031214
	st dev	0.119418	0.028402	0.005626	0.074829	0.001361	0.003019	0.002655
F_127	avg	0.053004	0.014836	0.03403	0.021857	0.02705	0.000148	0.007845
	st dev	0.031271	8.8e-05	0.003499	0.004397	0.009242	1e-06	0.000361
F_128	avg	0.159461	0.301781	0.278884	0.028291	0.01335	0.001428	0.135111
	st dev	0.045304	0.170907	0.061897	0.001742	0.002481	0.000589	0.043435
F_129	avg	0.030296	0.008031	0.005872	0.155583	0.064904	0.000446	0.005372
	st dev	0.003466	0.001404	0.000474	0.059502	0.020149	5.1e-05	0.000712
F_130	avg	0.113369	0.146415	0.138076	0.019197	0.01171	0.009611	0.081907
	st dev	0.036315	0.04188	0.031572	0.001323	0.007229	0.003446	0.023828
F_131	avg	0.069259	0.221955	0.220918	0.085719	0.036476	0.030934	0.129797
	st dev	0.002149	0.016026	0.104128	0.005553	0.019618	0.001716	0.010485
F_132	avg	0.05651	0.005735	0.006228	nd	0.091109	0.000558	0.002716
	st dev	0.021352	0.000686	0.001069		0.012708	4.6e-05	0.001298
F_133	avg	0.084892	0.105716	0.108831	0.125525	0.055639	0.001318	0.07412
	st dev	0.018406	0.06132	0.007519	0.02614	0.000306	0.000107	0.004952
F_135	avg	0.100074	0.234892	0.248976	0.013667	0.008637	0.001012	0.105542
	st dev	0.030854	0.085398	0.061874	0.00084	0.002852	0.000348	0.043633
F_136	avg	0.032181	0.004041	0.003635	0.205938	0.108665	0.000313	0.002045
	st dev	1.2e-05	0.000129	0.000692	0.013457	0.065699	2.6e-05	6.1e-05
F_137	avg	0.017606	0.006221	0.060394	0.002013	0.000744	0.006018	0.00713
	st dev	0.004807	0.001564	0.01562	0.000746	0.000289	0.002289	0.002469
F_138	avg	0.05791	0.285603	0.317029	0.046799	0.02628	0.000265	0.224875
	st dev	0.0008	0.029946	0.037445	0.019177	0.006496	0.000161	0.02604
F_138B	avg	0.075087	0.072176	0.0628	0.080142	0.047144	0.000198	0.047972
	st dev	0.000169	0.006092	0.005252	0.027758	0.014916	5.6e-05	0.004713
F_139	avg	0.063272	0.014327	0.013089	0.041036	0.018479	0.001682	0.004704
	st dev	0.005243	0.001238	0.005978	0.005339	0.00115	0.000152	0.000386
F_140	avg	0.181789	1.92476	1.5324	0.00488	0.002504	0.028175	0.98388
	st dev	0.023178	1.05875	0.122368	0.001176	0.000177	0.007496	0.071529
F_141	avg	0.085868	0.00924	0.01095	0.010625	0.005691	0.000216	0.003887
	st dev	0.010878	0.002363	0.000677	0.00316	0.002266	0.000105	0.001595
F_142	avg	0.190913	0.794445	0.494564	0.06948	0.042646	0.00124	0.407456
	st dev	0.094923	0.080398	0.331021	0.005628	0.008063	0.000724	0.03877
F_143	avg	0.03989	0.09737	0.067424	0.228697	0.113478	0.001686	0.057179
	st dev	0.002674	0.008704	0.039409	0.053852	0.004381	0.000172	0.004048
F_144	avg	0.255842	0.133534	0.103059	0.393976	0.215596	0.000575	0.077593
	st dev	0.034908	0.03967	0.032894	0.020884	0.002052	6e-05	0.005163
F_145	avg	0.052825	0.014935	0.015414	0.230665	0.122947	0.000647	0.005102
	st dev	0.015588	0.003541	0.006067	0.059604	0.027491	5e-05	0.001954
F_146	avg	0.158478	0.429759	0.435219	0.071745	0.039387	0.000646	0.222243
	st dev	0.010242	0.058193	0.047052	0.030358	0.015917	5.4e-05	0.091623
F_148	avg	0.099634	0.011234	0.011127	0.17185	0.081127	0.001032	0.005723
	st dev	0.014256	0.002212	0.001466	0.086562	0.005317	0.000404	0.001265
F_149	avg	0.182561	0.20783	0.149289	0.178925	0.099928	nd	0.227971
	st dev	0.059098	0.068839	0.045582	0.007105	0.01638		0.104078
F_149B	avg	0.099465	0.145781	0.141675	0.372212	0.206591	0.000643	0.104357
	st dev	0.010077	0.013185	0.010095	0.154607	0.08532	0.000259	0.009375
F_149C	avg	0.036536	0.65953	0.597837	0.121229	0.068193	0.000416	0.564381
	st dev	0.005324	0.04551	0.08116	0.023057	0.01608	2.7e-05	0.136296
F_150	avg	0.211245	0.123036	0.093376	0.015724	0.00859	0.005989	0.055019
	st dev	0.012302	0.011222	0.008934	0.005795	0.002023	0.001362	0.004167
F_151	avg	0.074964	0.029552	0.033601	0.196158	0.106343	0.005385	0.015678
	st dev	0.006089	0.0019	0.004295	0.039439	0.027948	0.002198	0.0082
F_152	avg	0.04137	0.091957	0.149998	0.010537	0.006876	0.01301	0.044916
	st dev	0.006357	0.016839	0.025632	0.006202	0.00054	0.001534	0.005792
F_153	avg	0.088512	0.099551	0.078382	0.096669	0.045096	0.005883	0.041937
	st dev	0.053659	0.010816	0.001363	0.011193	0.01352	0.002067	0.014234
F_154	avg	0.295342	0.29628	0.197642	0.02487	0.01078	0.013989	0.16176
	st dev	0.131117	0.039201	0.00243	0.002338	0.001039	0.004827	0.01758
F_155	avg	0.033443	0.06345	0.074358	0.007449	0.00405	0.000285	0.058083
	st dev	0.000304	0.007832	0.004175	0.001205	0.000788	0.000103	0.006124
F_157	avg	0.068541	0.03645	0.047822	0.09114	0.05536	0.000305	0.023172
	st dev	0.009841	0.02059	0.001869	0.031234	0.003559	4.8e-05	0.004788
F_158	avg	0.166937	0.064404	0.044877	0.076445	0.046875	0.00016	0.036852
	st dev	0.081864	0.008037	0.006012	0.002786	0.00251	1.4e-05	0.001051
F_159	avg	0.117289	0.009463	0.016342	0.043143	0.025436	0.000257	0.005522
	st dev	0.0341	0.001487	0.000144	0.012694	0.009559	1.8e-05	0.000252
F_160	avg	0.104844	0.359109	0.305669	0.31708	0.14833	0.001586	0.289474
	st dev	0.034318	0.00808	0.077697	0.092403	0.031262	0.000578	0.043434
F_161	avg	0.100696	0.045432	0.021307	0.044666	0.023089	0.001759	0.014492
	st dev	0.013086	0.007357	0.000864	0.007082	0.004383	0.000165	0.001688
F_162	avg	0.095434	0.023183	0.035148	0.019732	0.012084	0.005811	0.012061
	st dev	0.017068	0.011981	0.002284	0.005502	0.005933	0.000313	0.007172
F_163	avg	0.13001	0.053807	0.029754	0.027522	0.005926	0.009532	0.018079
	st dev	0.010111	0.020213	0.010697	0.002332	0.002479	0.002608	0.008995
F_164	avg	0.154346	0.273105	0.227622	0.112309	0.058171	0.001612	0.106367
	st dev	0.040348	0.037263	0.016257	0.05077	0.018053	0.000274	0.000361
F_166	avg	0.130811	0.332786	0.155574	0.021779	0.009866	0.016714	0.146413
	st dev	0.018848	0.128255	0.017429	0.011213	0.005825	0.006141	0.032666
F_167	avg	0.131495	0.056947	0.025328	0.459335	0.222652	0.000312	0.017239
	st dev	0.007855	0.020263	0.006762	0.189673	0.096244	2.6e-05	0.001719
F_168	avg	0.098392	0.00736	0.012929	0.081973	0.043973	0.000969	0.004375
	st dev	0.006282	0.000535	0.001272	0.005564	0.002905	7.6e-05	0.000573
F_169	avg	0.276523	0.486419	0.412487	0.024904	0.016834	0.00215	0.16474
	st dev	0.017775	0.204075	0.062343	0.002835	0.005379	0.000163	0.058816
F_170	avg	0.221257	0.449329	0.607354	0.053315	0.039965	0.028177	0.242884
	st dev	0.036994	0.03794	0.08778	0.004093	0.017898	0.000109	0.031893

## Sheet: S3
Supplemenary Table S3 Relative levels of DA metabolites measured by LC/ESI/MS in peel extracts of the RIL population. Levesl of accumulation are expressed as AVG and St dev of fold ISTD (internal standard, formononetin) from 2 biological replicates. nd: not detectable.
		delphinidin-3-rutinoside	nasunin	rutin	pseudoprotodioscin	n,n'-dicaffeoylspermidine	n-caffeoylputrescine	n-dihydrocaffoyl-n'-caffeospermidine	n-coumaroylputrescine	glutamine	unknown	trigonelline	acetylcholine	delphinidin 3-O-D-glucoside-5-(6-coumaroyl-D-glucoside)	kaempferol-3,7-O-diglucoside	kaempferol-3-O-D-glucoside
P_1	AVG	0.658073	nd	0.020351	0.121088	0.145081	0.284569	1.90108	0.186554	0.054922	0.208379	0.034493	0.406551	nd	0.004765	0.039024
	ST DEV	0.109758		0.006089	0.032221	0.012537	0.057653	0.416684	0.0342	0.006768	0.061509	0.010359	0.039299		0.000594	0.014035
P_2	AVG	0.558381	0.001427	0.01288	0.202126	0.092354	0.173815	1.0515	0.015169	0.031968	0.848328	0.019572	0.314595	nd	0.014528	0.007612
	ST DEV	0.180053	0.000151	0.001965	0.078902	0.007537	0.114544	0.007913	0.002104	0.024057	0.150037	0.00852	0.000205		0.002911	0.002661
P_3	AVG	0.645286	0.000705	0.023353	0.209799	0.106602	0.227159	1.0549	0.091347	0.081403	0.480652	0.054445	0.254887	nd	0.01437	0.002555
	ST DEV	0.183581	0.000364	0.017254	0.143893	0.044928	0.111871	0.331078	0.025071	0.051679	0.104698	0.011507	0.030938		0.000289	0.001198
P_4	AVG	0.509551	nd	0.012968	nd	0.116265	0.139117	1.55652	0.031	0.046162	0.475213	0.088356	0.096414	nd	0.003155	0.002297
	ST DEV	0.298087		0.006408		0.025776	0.023876	0.465549	0.006542	0.010016	0.087715	0.013813	0.020813		0.000296	0.000198
P_5	AVG	0.525144	0.000333	0.028415	0.151661	0.102445	0.116942	1.23557	0.033119	0.037461	0.923408	0.067783	0.324895	nd	0.04496	0.0196
	ST DEV	0.270658	0.000133	0.007761	0.024488	0.015734	0.011568	0.214256	0.012868	0.002723	0.005367	0.031898	0.063606		0.00431	0.000263
P_6	AVG	0.023532	0.48819	0.030961	0.176847	0.016005	0.259153	0.289786	0.061325	0.144711	1.03316	0.074911	0.276172	0.070409	0.030858	0.083319
	ST DEV	0.009644	0.040514	0.021811	0.113587	0.004865	0.102779	0.109833	0.031764	0.01308	0.597784	0.028965	0.054168	0.01875	0.007431
P_7	AVG	0.605274	0.001534	0.022182	0.293463	0.016061	0.278515	0.303121	0.118522	0.021051	0.735815	0.074076	0.140437	nd	0.037328	0.045641
	ST DEV	0.1127	0.000527	0.004578	0.018965	0.007828	0.039253	0.111477	0.041308	0.018061	0.17364	0.019727	0.020427		0.010984	0.007615
P_8	AVG	0.445885	0.000248	0.0254	0.114392	0.113643	0.103481	0.995217	0.02936	0.083033	0.2693	0.111806	0.20545	nd	0.034137	nd
	ST DEV	0.037107	9e-06	0.001756	0.055138	0.007988	0.049684	0.073718	0.004164	0.031088	0.19862	0.020739	0.230288		0.03681
P_9	AVG	0.029193	0.535734	0.023191	0.084556	0.02671	0.133888	0.368511	0.028109	0.0918	0.552797	0.022636	0.133936	0.067902	0.023891	0.008603
	ST DEV	0.004605	0.076932	0.001159	0.044217	0.002477	0.073879	0.140484	0.0033	0.021128	0.276681	0.0104	0.055682	0.014296	0.002111	0.004067
P_10	AVG	0.016906	0.512623	0.015731	0.204991	0.203143	0.127276	1.52346	0.015299	0.094647	0.49544	0.067375	0.37533	0.070181	0.005301	0.013009
	ST DEV	0.007018	0.169565	0.000164	0.133439	0.022691	0.015757	0.28825	0.002485	0.0518	0.188798	0.045467	0.058984	0.013789	0.002177	0.00156
P_11	AVG	0.016695	0.627495	0.021769	0.146975	0.118969	0.165343	1.15874	0.028916	0.072367	0.443233	0.079873	0.070221	0.057485	0.042493	0.020971
	ST DEV	0.000952	0.095202	0.013897	0.072378	0.013407	0.008459	0.103702	0.011309	0.057049	0.114068	0.032647	0.041602	0.013115	0.010038	0.014753
P_12	AVG	0.542234	0.388392	0.030951	0.104026	0.027917	0.298468	0.412053	0.233807	0.243893	0.454388	0.080034	0.270103	0.024874	0.015845	0.008822
	ST DEV	0.134914	0.133146	0.013178	0.044558	0.008581	0.097162	0.084026	0.021225	0.031211	0.139612	0.023654	0.066885	0.001957	0.001659	0.001597
P_13	AVG	0.192222	nd	0.014835	nd	0.019011	0.232921	0.243004	0.110436	0.94218	0.599826	0.060227	0.495074	nd	0.016671	0.019931
	ST DEV	0.251321		0.001361		0.000771	0.037763	0.017733	0.034878	0.068548	0.068627	0.059134	0.357678		0.009997	0.011289
P_14	AVG	0.034092	0.613351	0.017523	0.172251	0.017672	0.154993	0.231447	0.038438	0.069825	0.655611	0.027711	0.218551	0.055727	0.035954	0.02373
	ST DEV	0.017144	0.045853	0.004319	0.044008	0.002657	0.033471	0.071884	0.007064	0.028666	0.100819	0.000337	0.015618	0.007376	0.008629	0.019181
P_16	AVG	0.447535	0.000129	0.025094	0.306159	0.1947	0.299405	1.66231	0.060157	0.065263	0.843732	0.052054	0.212851	nd	0.042064	0.024347
	ST DEV	0.078904	5.4e-05	0.004571	0.062469	0.022905	0.029796	0.525885	0.000615	0.014678	0.177808	0.016622	0.054521		0.015418	0.002853
P_17	AVG	0.54801	0.000401	0.049264	0.235919	0.104065	0.203339	1.2075	0.104274	0.071588	0.283913	0.106645	0.362651	nd	0.01838	0.034438
	ST DEV	0.173512	2.7e-05	0.016542	0.052851	0.063641	0.125188	0.535378	0.060813	0.020585	0.17299	0.026995	0.142801		0.000363	0.011369
P_18	AVG	0.884905	0.001262	0.046654	0.238703	0.122282	0.447822	1.32927	0.219854	0.052097	1.17914	0.068669	0.296903	nd	0.060651	0.071325
	ST DEV	0.117432	0.000528	0.002739	0.076379	0.00944	0.036332	0.117777	0.083908	0.012026	0.480196	0.041251	0.012449		0.015012	0.051725
P_19	AVG	0.013769	0.528588	0.018141	0.192758	0.016926	0.146009	0.231113	0.022023	0.098129	0.546647	0.054282	0.163213	0.029522	0.028937	0.01954
	ST DEV	0.004507	0.07962	0.00262	0.023958	0.003869	0.010725	0.017126	0.001952	0.008128	0.318768	0.004742	0.015069	0.006868	0.008168	0.001919
P_20	AVG	0.68363	0.000991	0.016418	0.281736	0.132909	0.275128	1.18069	0.166841	0.034047	1.59666	0.08714	0.31816	nd	0.050699	0.018068
	ST DEV	0.011975	0.000288	0.001404	0.101304	0.029528	0.065532	0.239207	0.009342	0.005777	0.377207	0.058961	0.176015		0.004312	0.005529
P_21	AVG	0.040533	0.797368	0.029607	0.156051	0.029804	0.148207	0.158018	0.039318	0.079146	0.261174	0.029398	0.147274	0.099435	0.013269	0.012206
	ST DEV	0.002623	0.110792	0.002353	0.06629	0.019328	0.007431	0.041013	0.030126	0.054174	0.010689	0.009624	0.025106	0.014349	0.001772	0.004035
P_22	AVG	0.034365	0.578834	0.053861	0.170392	0.012682	0.094293	0.235238	0.028261	0.086014	0.328776	0.042301	0.183144	0.05459	0.023543	0.056669
	ST DEV	0.010515	0.029589	0.035037	0.050158	0.004696	0.028572	0.063789	0.013818	0.005715	0.048128	0.005911	0.026323	0.006789	0.0037	0.050491
P_23	AVG	0.688585	0.00122	0.01435	0.410932	0.121993	0.196791	0.933673	0.06547	0.039409	0.782796	0.058444	0.209796	nd	0.038517	0.017083
	ST DEV	0.152263	0.001006	0.002496	0.23228	0.011645	0.05264	0.300265	0.02528	0.026495	0.080152	0.02196	0.018104		0.002714	0.002968
P_25	AVG	0.016702	0.494929	0.021588	0.119198	0.01771	0.293412	0.323403	0.064379	0.065466	1.06282	0.076075	0.222851	0.104049	0.11747	0.061457
	ST DEV	0.000468	0.035663	0.002323	0.011471	0.003483	0.175782	0.028081	0.063716	0.02698	0.272399	0.015726	0.09378	0.015646	0.005662	0.034839
P_26	AVG	0.039243	1.10174	0.013143	0.143484	0.01575	0.123424	0.222434	0.021491	0.048698	0.260532	0.032194	0.145749	0.132256	0.015304	0.00871
	ST DEV	0.00614	0.286057	0.002621	0.025768	0.004831	0.021444	0.087126	0.002532	0.018971	0.017367	0.008905	0.071506	0.016876	0.004526	0.004441
P_27	AVG	0.009576	0.459571	0.015176	0.408915	0.015513	0.094397	0.277662	0.025697	0.066585	0.601876	0.033783	0.250777	0.093328	0.03188	0.018967
	ST DEV	0.003094	0.073749	0.003448	0.11626	0.004411	0.047941	0.053242	0.012363	0.009165	0.093352	0.01162	0.018594	0.006764	0.007432	0.0071
P_28	AVG	0.011822	0.314046	0.017525	0.086043	0.034242	0.18462	0.45731	0.018233	0.18138	0.386957	0.059113	0.254046	0.027136	0.043191	0.010016
	ST DEV	0.002769	0.04059	0.00487	0.009454	0.002704	0.068459	0.085867	0.008941	0.202259	0.125555	0.014336	0.124959	0.001797	0.00789	0.004998
P_30	AVG	0.010578	0.529208	0.02229	0.142107	0.014031	0.119604	0.225486	0.033515	0.151151	0.435024	0.028422	0.35294	0.034597	0.014534	0.01149
	ST DEV	0.004056	0.018684	0.007053	0.075173	0.003641	0.063167	0.065429	0.014737	0.038986	0.109091	0.005574	0.044548	0.000669	0.00566	0.001548
P_31	AVG	0.010441	0.463415	0.006981	0.16723	0.110858	0.140284	1.15579	0.040445	0.128146	0.263733	0.033205	0.180263	0.053365	0.013781	0.002229
	ST DEV	0.003869	0.07852	0.002964	0.085937	0.009486	0.02276	0.101852	0.00573	0.016238	0.072271	0.010929	0.046318	0.025506	0.00526	0.001065
P_32	AVG	0.502565	0.001213	0.026169	0.185579	0.083941	0.188101	0.958073	0.042073	0.022762	0.799521	0.044776	0.130882	nd	0.038519	0.017992
	ST DEV	0.084008	0.000592	0.000424	0.015318	0.004563	0.024382	0.188881	0.017664	0.007032	0.219476	0.006163	0.03068		0.001162	0.006896
P_33	AVG	0.34156	0.004937	0.010243	nd	0.109195	0.08762	0.93341	0.06161	0.055963	0.284385	0.09512	0.111894	nd	0.001625	0.002574
	ST DEV	0.055993	0.001366	0.005344		0.014767	0.007637	0.074293	0.000772	0.007212	0.026331	0.067197	0.004279		0.000538	0.000171
P_34	AVG	0.004534	0.46729	0.016068	nd	0.166819	0.136146	1.3634	0.041711	0.075585	0.734704	0.052839	0.110576	0.033422	0.075565	0.031223
	ST DEV	0.002259	0.177268	0.006192		0.051827	0.001424	0.294948	0.008459	0.002145	0.14237	0.022798	0.016612	0.010037	0.033515	0.002897
P_35	AVG	0.006006	0.42336	0.008349	0.465009	0.11027	0.070704	1.15515	0.004642	0.047648	1.34411	0.060304	0.250591	0.064831	0.022522	0.005298
	ST DEV	6.8e-05	0.009882	8.5e-05	0.303205	0.032326	0.044211	0.301268	0.001213	0.017738	0.410005	0.048871	0.163378	0.010519	0.00321	0.002607
P_36	AVG	0.011699	0.575182	0.017004	0.249571	0.013716	0.120934	0.228265	0.031119	0.062125	0.636412	0.027211	0.262707	0.072278	0.047815	0.012533
	ST DEV	0.003953	0.191894	0.003063	0.019349	0.00109	0.030698	0.01982	0.011917	0.004469	0.051189	0.005345	0.034876	0.010485	0.004867	0.008204
P_37	AVG	0.025958	0.5383	0.015277	0.147277	0.013811	0.096123	0.244849	0.013762	0.023594	0.268604	0.09464	0.129596	0.04727	0.030006	0.021557
	ST DEV	0.018156	0.066001	0.00836	0.05374	0.004645	0.089844	0.119815	0.00024	0.002319	0.091828	0.008392	0.05244	0.005155	0.008963	0.02001
P_38	AVG	0.0139	0.415519	0.027877	0.116666	0.023614	0.176717	0.329816	0.016482	0.110432	0.487625	0.069326	0.131835	0.035909	0.034663	0.022008
	ST DEV	0.003302	0.012398	0.000267	0.007425	0.008535	0.040639	0.16257	0.001179	0.021565	0.000275	0.000277	0.023603	0.002233	0.002123	0.00075
P_39	AVG	0.414283	0.000445	0.015926	0.088	0.103475	0.111124	1.02662	0.046855	0.039943	0.263515	0.043064	0.226418	3.6e-05	0.034789	0.008847
	ST DEV	0.059197	2.2e-05	0.005611	0.031723	0.018203	0.093831	0.284806	0.039483	0.002526	0.046703	0.025777	0.015094	4e-06	0.005883	0.004935
P_40	AVG	0.023914	0.687578	0.020453	0.205769	0.016546	0.165464	0.219752	0.045109	0.059334	0.521503	0.015031	0.120571	0.098644	0.049687	0.016707
	ST DEV	0.008773	0.04685	0.002269	0.061062	0.001135	0.026138	0.010212	0.003003	0.005815	0.111567	0.008455	0.061505	0.001894	0.00168	0.006712
P_41	AVG	0.025233	0.632393	0.023261	0.297767	0.166921	0.21352	1.60316	0.024122	0.054806	0.962153	0.056817	0.308824	0.044006	0.005321	0.016702
	ST DEV	0.003603	0.078452	0.009337	0.006646	0.104296	0.121301	0.791073	0.02257	0.017729	0.068775	0.018644	0.007235	0.001862	0.000281	0.009977
P_42	AVG	0.009465	0.463254	0.013351	nd	0.08303	0.190649	0.791575	0.106264	0.120712	0.231445	0.01852	0.109546	0.068493	0.027077	0.015697
	ST DEV	0.002267	0.065573	0.007478		0.003046	0.053706	0.066119	0.024025	0.017274	0.075419	0.001992	0.004959	0.025565	0.008137	0.003857
P_43	AVG	0.747132	nd	0.011191	nd	0.130554	0.151532	1.64614	0.072983	0.066122	0.529009	0.022751	0.150672	nd	0.036709	0.017271
	ST DEV	0.106611		0.003366		0.016113	0.057328	0.584359	0.014127	0.008813	0.200332	0.005284	0.011597		0.014279	0.006234
P_44	AVG	0.033238	0.654592	0.041425	0.170579	0.089902	0.117279	0.877585	0.017287	0.066224	0.348654	0.030188	0.278748	0.088103	0.043978	0.033495
	ST DEV	0.018133	0.003018	0.038943	0.078546	0.023446	0.086449	0.131951	0.015045	0.020227	0.002781	0.015729	0.22627	0.023795	0.035706	0.031072
P_45	AVG	0.009552	0.50177	0.013307	0.338484	0.02757	0.14809	0.405279	0.022437	0.018289	1.03872	0.048461	0.09988	0.051053	0.031862	0.017178
	ST DEV	0.004844	0.200629	0.002505	0.101514	0.004588	0.003754	0.057241	0.012426	0.002051	0.038894	0.015643	0.002143	0.032833	0.022894	0.011396
P_46	AVG	0.337006	0.093273	0.032803	0.13632	0.040455	0.184915	0.384547	0.067211	0.036799	0.791398	0.021382	0.072976	0.011342	0.035601	0.082294
	ST DEV	0.127197	0.010141	0.010737	0.039496	0.002761	0.023415	0.129392	0.018355	0.002485	0.214556	0.012829	0.016622	0.001929	0.018601	0.02233
P_47	AVG	0.020069	0.473167	0.035359	0.112588	0.082733	0.101116	0.685624	0.040019	0.131637	0.363764	0.049475	0.286094	0.032735	0.046817	0.051064
	ST DEV	0.003566	0.035592	0.015519	0.05785	0.007173	0.033046	0.301243	0.029033	0.039933	0.128858	0.013456	0.064025	0.004491	0.008664	0.051396
P_48	AVG	0.76095	0.004511	0.029046	0.195695	0.084863	0.115703	1.00809	0.083785	0.046236	0.683791	0.029052	0.041669	0.000349	0.034896	0.023209
	ST DEV	0.099293	0.004452	0.006004	0.037371	0.008784	0.018724	0.070435	0.038195	0.016881	0.388001	0.022452	0.004549	5.2e-05	0.005345	0.005334
P_49	AVG	0.796446	0.000971	0.039193	0.210176	0.08797	0.140504	0.810823	0.085592	0.055695	0.274801	0.078325	0.079535	nd	0.081175	0.067419
	ST DEV	0.010822	0.000398	0.030712	0.03785	0.006916	0.023406	0.051155	0.010182	0.000793	0.068796	0.079954	0.035004		0.007936	0.000773
P_50	AVG	0.02166	0.560157	0.015759	0.112299	0.0738	0.063357	0.814856	0.01595	0.046201	0.412799	0.059004	0.034298	0.059045	0.012112	0.003698
	ST DEV	0.00771	0.04174	0.003456	0.04256	0.011388	0.031719	0.415789	0.003519	0.020601	0.128975	0.019844	0.011484	0.000264	0.002883	0.001347
P_51	AVG	0.438532	0.000847	0.027976	0.232084	0.159373	0.156382	1.12477	0.10053	0.04656	0.284529	0.026218	0.10249	nd	0.014362	0.031011
	ST DEV	0.302847	0.000111	0.000374	0.115416	0.013746	0.033973	0.098948	0.051978	0.011758	0.123973	0.020108	0.008226		0.005243	0.011955
P_52	AVG	0.501927	0.000356	0.012142	0.237419	0.022131	0.34213	0.30222	0.061706	0.07819	1.09244	0.074491	0.159718	nd	0.013827	0.017202
	ST DEV	0.257148	0.000111	0.006422	0.172971	0.002081	0.199398	0.01878	0.035803	0.067248	0.287274	0.048908	0.065817		0.007165	0.006174
P_54	AVG	0.008424	0.384535	0.008533	0.136618	0.087794	0.219798	0.906523	0.038267	0.071222	0.324539	0.006662	0.18576	0.025873	0.010619	0.007449
	ST DEV	0.001434	0.07401	0.001511	0.06226	0.003085	0.022417	0.10537	0.018193	0.01545	0.029457	0.001272	0.033325	0.002338	0.00115	0.001305
P_55	AVG	0.013455	0.63995	0.007172	0.232213	0.008484	0.080841	0.132726	0.025716	0.083309	0.324388	0.027989	0.260714	0.048297	0.049696	0.01781
	ST DEV	0.005926	0.120306	0.002645	0.040985	0.000681	0.006059	0.009824	0.004849	0.029971	0.106122	0.015462	0.058739	0.002704	0.007155	0.003816
P_56	AVG	0.020998	0.581212	0.021739	0.169057	0.016814	0.131356	0.327872	0.019519	0.075488	1.18762	0.106273	0.215828	0.075583	0.033606	0.023534
	ST DEV	0.003489	0.024966	0.001215	0.082125	0.000517	0.021362	0.07581	0.012654	0.004856	0.088218	0.075077	0.146132	0.004365	0.004579	0.011989
P_57	AVG	0.021127	0.52503	0.017666	0.028774	0.125463	0.0685	0.909867	0.005945	0.08782	0.18998	0.020963	0.347912	0.043122	0.01586	0.003525
	ST DEV	0.006306	0.027386	0.016201	0.010372	0.014906	0.016146	0.330329	0.001572	0.014987	0.046799	0.009927	0.119003	0.004149	0.004624	0.003267
P_58	AVG	0.019258	0.546789	0.034136	0.050286	0.018612	0.1203	0.321899	0.025989	0.074583	0.30272	0.079535	0.370151	0.034517	0.020404	0.040261
	ST DEV	0.017587	0.289681	0.002716	0.001991	0.000609	0.119139	0.006095	0.022376	0.030818	0.028692	0.015661	0.109783	0.010057	0.002967	0.01889
P_59	AVG	0.007254	0.531858	0.017654	0.240518	0.026577	0.231291	0.403	0.045926	0.039231	0.739556	0.049819	0.177118	0.039149	0.04569	0.014587
	ST DEV	0.001117	0.071106	0.004831	0.080664	0.008175	0.123209	0.139129	0.047968	0.012314	0.255698	0.004753	0.153294	0.007189	0.00332	0.008556
P_60	AVG	0.008549	0.442168	0.013857	0.107253	0.011326	0.065032	0.184045	0.026569	0.054664	0.05927	0.005201	0.113708	0.043662	0.044745	0.004041
	ST DEV	0.002632	0.050141	0.003944	0.071425	0.001776	0.015918	0.04969	0.010127	0.026595	0.037973	0.002735	0.034307	0.012996	0.007734	0.002309
P_61	AVG	0.050871	0.478419	0.00844	0.031237	0.00361	0.008442	0.045241	0.003983	0.070219	0.088113	0.027877	0.284095	0.058651	0.005739	0.000918
	ST DEV	0.008669	0.04673	0.001376	0.009054	0.000118	0.002602	0.016347	0.000156	0.006411	0.062598	0.007712	0.082716	0.020622	0.001284	0.000291
P_61B	AVG	0.010223	0.449217	0.020634	0.069831	0.010757	0.070402	0.137823	0.01357	0.079583	0.172454	0.048591	0.103531	0.065743	0.043201	0.021116
	ST DEV	0.000326	0.041726	0.001825	0.003514	0.002844	0.01795	0.005634	0.005425	0.014375	0.045716	0.002064	0.007498	0.016187	0.000944	0.005989
P_62	AVG	0.011622	0.583459	0.010526	0.070098	0.014033	0.042897	0.172083	0.012207	0.07743	0.169592	0.03504	0.172303	0.047093	0.023778	0.009949
	ST DEV	0.003826	0.03384	0.004301	0.002076	0.002443	0.015343	0.020506	0.012723	0.022162	0.07578	0.007773	0.011188	0.002603	0.000903	0.004244
P_63	AVG	0.005184	0.359672	0.012526	0.270251	0.014112	0.119331	0.30555	0.015235	0.074139	0.991712	0.054631	0.164186	0.046669	0.047723	0.005932
	ST DEV	0.000197	0.024701	0.001344	0.125076	0.001432	0.053808	0.13216	0.000964	0.060878	0.390749	0.0142	0.098825	0.011445	0.012194	0.004204
P_64	AVG	0.014978	0.63219	0.011336	nd	0.065587	0.014331	0.602498	0.004987	0.09194	0.217783	0.013066	0.270186	0.018295	0.023051	0.014199
	ST DEV	0.003938	0.134046	0.004074		0.001615	0.00378	0.053698	0.001415	0.005094	0.045263	0.004951	0.041437	0.000694	0.000308	0.004371
P_65	AVG	0.637147	nd	0.018251	nd	0.158166	0.301594	1.51848	0.088826	0.026395	1.72032	0.050731	0.564423	nd	0.016345	0.01894
	ST DEV	0.220481		0.011804		0.008997	0.121303	0.105496	0.036196	0.009368	0.203158	0.059764	0.053314		0.007259	0.023327
P_66	AVG	0.025799	0.78286	0.018212	0.109474	0.010073	0.027454	0.138617	0.007295	0.035699	0.064365	0.039215	0.040758	0.026654	0.00143	0.003007
	ST DEV	0.010267	0.187032	0.007596	0.01011	0.000921	8.3e-05	0.012195	0.002671	0.007732	0.003769	0.006787	3e-05	0.000783	0.000506	0.001255
P_67	AVG	0.884015	0.000301	0.032939	0.339359	0.180576	0.406767	1.70507	0.198607	0.054864	1.12254	0.088738	0.399702	nd	0.025735	0.033968
	ST DEV	0.001876	9e-06	0.003013	0.026964	0.02742	0.056707	0.359439	0.036932	0.042881	0.218417	0.036621	0.127676		0.003277	0.009018
P_68	AVG	0.011	0.444898	0.002064	nd	0.045982	0.051076	0.556666	0.009854	0.069397	0.220382	0.015042	0.391762	0.017201	0.014149	0.004955
	ST DEV	0.003108	0.170113	0.00077		0.003468	0.001441	0.151316	0.001679	0.010162	0.014696	0.001546	0.023376	0.006023	0.001796	0.002123
P_70	AVG	0.790133	0.00044	0.04768	0.449393	0.130053	0.259758	1.38376	0.05188	0.077662	1.21521	0.071393	0.106191	nd	0.054401	0.024088
	ST DEV	0.028299	2.1e-05	0.041408	0.172358	0.001209	0.005601	0.306628	0.025958	0.076484	0.126295	0.053148	0.064407		0.042077	0.021606
P_71	AVG	0.46085	0.008052	nd	0.252508	0.015556	0.20509	0.243632	0.072379	0.065783	0.513986	0.040852	0.394882	nd	0.089707	0.034752
	ST DEV	0.080424	0.005665		0.036414	0.01055	0.122851	0.095693	0.047881	0.00983	0.082051	0.001037	0.071794		0.015236	0.024443
P_72	AVG	0.013763	0.469226	nd	0.052047	0.024699	0.045969	0.302124	0.007515	0.179769	0.428505	0.025993	0.160883	0.024238	0.002605	0.001814
	ST DEV	0.004892	0.067438		0.010366	0.003252	0.010147	0.041456	0.000542	0.066266	0.134595	0.004348	0.039652	0.003091	0.000222	0.000468
P_73	AVG	0.683518	0.005095	0.013766	0.23641	0.163386	0.189829	1.33247	0.099354	0.062308	0.696397	0.086097	0.035351	nd	0.00505	0.005966
	ST DEV	0.044695	0.006755	0.000894	0.002443	0.034532	0.095652	0.302067	0.046462	0.039737	0.204951	0.026258	0.002536		0.001965	0.002296
P_74	AVG	0.020707	0.598324	nd	0.074721	0.026114	0.092916	0.415204	0.026837	0.117811	0.390149	0.032632	0.288252	0.043116	0.007769	0.000958
	ST DEV	0.009241	0.124605		0.021471	0.003244	0.065853	0.095603	0.001231	0.03252	0.085408	0.014964	0.005584	0.00094	0.004773	0.000482
P_75	AVG	0.014282	0.477999	0.023029	0.150736	0.011124	0.159814	0.190663	0.073993	0.121747	0.569065	0.058507	0.11617	0.045123	0.025641	0.029175
	ST DEV	0.001002	0.048767	0.001563	0.00912	0.000558	0.087329	0.067364	0.065428	0.047762	0.0881	0.014936	0.055751	0.005653	0.00784	0.004436
P_76	AVG	0.021257	0.566598	0.012608	0.094448	0.089671	0.132687	0.963069	0.037891	0.086607	0.384139	0.041727	0.689707	0.059316	nd	0.021461
	ST DEV	0.012303	0.105794	0.000455	0.05199	0.016548	0.011343	0.185032	0.011998	0.015722	0.193678	0.025571	0.101551	0.017026		0.025268
P_77	AVG	0.030298	0.5804	0.056638	0.0852	0.018709	0.196505	0.218914	0.098616	0.090174	0.37811	0.039166	0.686089	0.040717	0.021873	0.052043
	ST DEV	0.000153	0.081	0.012907	0.03131	0.001672	0.09154	0.018301	0.048079	0.027444	0.040896	0.019239	0.010047	0.005088	0.001013	0.034148
P_78	AVG	0.12796	0.323919	0.006829	0.136278	0.021351	0.163859	0.355357	0.023697	0.103911	0.214	0.057372	0.236363	0.024585	0.015063	0.004605
	ST DEV	0.032644	0.056518	0.002308	0.117726	0.00214	0.00413	0.023155	0.00381	0.013494	0.061985	0.002026	0.046148	0.005737	0.002672	0.000475
P_79	AVG	0.005967	0.336107	0.014604	0.244069	0.051436	0.165785	0.554278	0.021623	0.011774	1.55027	0.046249	0.404549	0.019734	0.019154	0.010647
	ST DEV	0.001607	0.122075	0.010836	0	0.018437	0.099649	0.040312	0.000233	0.003679	0.315727	0.006887	0.184263	0.011253	0.013515	0.003351
P_80	AVG	0.02514	0.730171	0.012166	0.08625	0.007456	0.064347	0.133891	0.023173	0.056718	0.156759	0.07082	0.19635	0.094952	0.028135	0.010167
	ST DEV	0.003994	0.143131	0.001636	0.025568	0.003279	0.021323	0.014423	0.00015	0.020508	0.061506	0.046432	0.006246	0.005636	0.001064	0.006565
P_81	AVG	0.657024	0.000314	0.033951	0.16851	0.071489	0.213953	0.977736	0.141993	0.114595	0.397141	0.067794	0.044505	nd	0.019733	0.010876
	ST DEV	0.312864	8.4e-05	0.006636	0.00302	0.011727	0.127138	0.266599	0.046693	0.008316	0.114242	0.040254	0.031235		0.001838	0.009671
P_82	AVG	0.023504	0.484954	0.025653	0.070815	0.019179	0.050433	0.162826	0.019878	0.050877	0.130358	0.050084	0.166411	0.032194	0.010355	0.004857
	ST DEV	0.008303	0.069907	0.002801	0.012124	0.017465	0.01004	0.03133	0.002009	0.026748	0.038753	0.029417	0.010019	0.005306	0.003798	7.7e-05
P_83	AVG	0.403006	nd	0.011464	nd	0.08853	0.13488	0.928704	0.065543	0.053237	0.634889	0.06573	0.082973	nd	0.003918	0.002824
	ST DEV	0.171416		0.001788		0.013299	0.075437	0.077973	0.007051	0.003955	0.378976	0.026192	0.043832		0.000883	0.000554
P_84	AVG	0.025635	0.621386	0.021126	0.076342	0.043801	0.083859	0.716553	0.019194	0.085816	0.272076	0.103302	0.065591	0.067776	0.02512	0.004675
	ST DEV	0.012671	0.262654	0.001882	0.001873	0.006165	0.049122	0.0675	0.011143	0.012683	0.000662	0.032857	0.017669	0.030492	0.006636	0.004668
P_85	AVG	0.417714	0.001437	0.020207	0.30904	0.110123	0.18156	1.35091	0.066638	0.106978	0.536225	0.077993	0.169099	nd	0.037457	0.014768
	ST DEV	0.021645	0.000205	0.007325	0.137781	0.022564	0.022564	0.202848	0.001435	0.050919	0.030787	0.029273	0.112983		0.00784	0.00997
P_86	AVG	0.004252	0.340322	0.011139	0.073974	0.015263	0.007191	0.222589	0.004404	0.184351	0.063522	0.08025	0.251951	0.009989	0.043424	0.000934
	ST DEV	0.000703	0.032156	0.003829	0.030176	0.000381	0.000682	0.056973	0.00112	0.011956	0.017082	0.012375	0.015042	0.001991	0.00756	0.000201
P_88	AVG	0.571552	nd	0.021723	0.163364	0.242384	0.266321	1.53992	0.115768	0.093247	0.568005	0.007082	0.191319	nd	0.028761	0.011868
	ST DEV	0.03098		0.008043	0.001775	0.04725	0.016751	0.350888	0.006567	0.003666	0.003225	0.001502	0.046038		0.000975	0.002454
P_89	AVG	0.875065	0.001414	0.014166	0.199612	0.021976	0.348605	0.323965	0.069116	0.091317	0.344173	0.030685	0.342244	nd	0.019882	0.009074
	ST DEV	0.12489	0.001419	0.001017	0.011551	0.008492	0.104402	0.125574	0.01219	0.030236	0.047918	0.006887	0.148692		0.002322	0.001174
P_90	AVG	0.493223		0.019851	0.179362	0.054674	0.144412	0.688027	0.144694	0.105013	0.126216	0.013343	0.340777	nd	0.032073	0.042341
	ST DEV	0.187944		0.001915	0.109513	0.001426	0.001653	0.035936	0.035445	0.002688	0.003149	0.003147	0.005164		0.011849	0.006458
P_91	AVG	0.039019	0.73777	0.025297	0.105402	0.014534	0.225481	0.255677	0.080783	0.037299	0.460926	0.044243	0.177978	0.100188	0.012518	0.02611
	ST DEV	0.003121	0.190504	0.000697	0.001421	0.00415	0.033239	0.023637	0.002643	0.040419	0.097789	0.01688	0.031755	0.003601	2.3e-05	0.000291
P_92	AVG	0.467058		0.012804		0.022277	0.132627	0.240805	0.054983	0.103105	0.274897	0.054162	0.154828	nd	0.019871	0.004674
	ST DEV	0.189747		0.002357		0.000924	0.015624	0.062607	0.020325	0.009223	0.078296	0.012223	0.040349		0.005572	0.00122
P_93	AVG	0.039516	0.557577	0.080537	0.121445	0.010937	0.204195	0.23107	0.037176	0.064522	0.566813	0.077162	0.098013	0.113016	0.062477	0.086128
	ST DEV	0.012903	0.022016	0.020403	0.016938	0.00133	0.013057	0.012066	0.0041	0.033857	0.205962	0.043371	0.000627	0.001904	0.008826	0.032075
P_94	AVG	0.941662	0.001298	0.036839	0.14584	0.08647	0.298103	1.2397	0.139001	0.06251	0.235603	0.03911	0.408193	nd	0.018804	0.015319
	ST DEV	0.081448	0.000953	0.015246	0.059641	0.019926	0.018013	0.665409	0.002127	0.006801	0.028105	0.035641	0.060139		0.00273	0.006725
P_95	AVG	0.379108	0.000182	0.042776	0.135688	0.127504	0.231764	1.30123	0.084065	0.057799	0.873907	0.060373	0.278758	nd	0.050046	0.078728
	ST DEV	0.213186	2.3e-05	0.011792	0.0396	0.015787	0.036935	0.176598	0.031195	0.030063	0.154217	0.038839	0.088245		0.002408	0.059437
P_96	AVG	0.044268	0.822686	0.016561	0.083903	0.054373	0.158706	0.814303	0.044347	0.087965	0.321226	0.032288	0.282817	0.077372	0.017705	0.018777
	ST DEV	0.020299	0.196116	0.002378	0.031454	0.003219	0.01118	0.220494	0.001331	0.023536	0.177458	0.013185	0.084698	0.002338	0.000365	0.018057
P_97	AVG	0.026797	0.52565	0.033296	0.096002	0.018493	0.151008	0.327211	0.027069	0.09619	0.851443	0.069536	0.378854	0.065751	0.019913	0.04145
	ST DEV	0.002148	0.145968	0.001232	0.044653	0.000654	0.09143	0.031192	0.017346	0.07145	0.010009	0.002243	0.007014	0.016654	0.001706	0.022608
P_98	AVG	0.689679	nd	0.022506	0.13796	0.080929	0.19364	0.900076	0.133477	0.07691	0.386118	0.013825	0.157035	nd	0.014227	0.011018
	ST DEV	0.203345		0.015804		0.028208	0.040029	0.247613	0.018459	0.02937	0.085359	0.007223	0.074274		0.006438	0.003298
P_99	AVG	0.016713	0.561604	0.009399	0.076918	0.009693	0.04076	0.139659	0.006802	0.044129	0.278557	0.090337	0.346724	0.025233	0.01646	0.009208
	ST DEV	0.003221	0.086129	0.000423	0.031482	0.000916	0.014377	0.052079	0.000947	0.029283	0.06781	0.012144	0.137413	0.008246	0.009328	0.003063
P_100	AVG	0.516832	0.000464	0.030166	0.141236	0.120879	0.235066	1.29772	0.116335	0.034241	0.599718	0.050108	0.272638	nd	0.051562	0.034853
	ST DEV	0.051214	0.000305	0.003123	0.009262	0.016098	0.078848	0.28494	0.026534	0.012616	0.173223	0.017126	0.06337		0.008773	0.007493
P_101	AVG	0.006415	0.47484	0.005629	0.206355	0.084241	0.058476	0.702511	0.009819	0.102896	0.232708	0.044599	0.547719	0.023595	0.017339	0.007785
	ST DEV	0.001797	0.124027	0.002496	0.058933	0.010867	0.000816	0.035489	9.9e-05	0.008235	0.006323	0.006032	0.037364	0.003008	0.000923	0.000342
P_102	AVG	0.01399	0.377295	0.016791	0.130159	0.043713	0.227566	0.522703	0.036708	0.05102	0.661522	0.012087	0.345373	0.011799	0.003068	0.004825
	ST DEV	0.003393	0.069857	0.00533	0.050042	0.005034	0.044655	0.027539	0.003278	0.003598	0.123699	0.002992	0.079458	0.003356	0.000156	0.000942
P_103	AVG	0.733025	0.001912	0.032174	0.372377	0.09412	0.179341	1.05183	0.102299	0.085237	0.187733	0.023697	0.159049	0.000251	0.025743	0.019998
	ST DEV	0.134896	0.00059	0.01176	0.123563	0.017566	0.063965	0.17789	0.028219	0.003334	0.099484	0.0014	0.038902	6.8e-05	0.001188	0.000431
P_104	AVG	0.531103	nd	0.011986	nd	0.097823	0.212729	1.34625	0.140992	0.020967	0.347409	0.048194	0.182802	nd	0.026143	0.00803
	ST DEV	0.025858		0.002532		0.025745	0.086173	0.508471	0.025068	0.003643	0.034174	0.011817	0.02935		1.2e-05	0.00257
P_105	AVG	0.028092	0.599004	0.01635	0.077134	0.014252	0.025321	0.255424	0.003131	0.045734	0.255333	0.082105	0.285341	0.053414	0.010608	0.007026
	ST DEV	0.000616	0.156537	0.009157	0.020878	0.004714	0.01979	0.110484	0.001137	0.034004	0.139511	0.007486	0.103585	0.018612	0.008801	0.006849
P_106	AVG	0.033052	0.683319	0.027499	0.193781	0.04943	0.053199	0.459663	0.005389	0.068858	0.251555	0.033735	0.104279	0.050564	0.060457	0.033165
	ST DEV	0.004338	0.100596	0.012546	0.026444	0.054348	0.040299	0.372103	0.000985	0.019641	0.034293	0.020883	0.020624	0.009923	0.038995	0.01531
P_107	AVG	0.012347	0.527482	0.013967	0.182735	0.00878	0.064735	0.155826	0.010899	0.064578	0.396955	0.023163	0.105272	0.073262	0.039492	0.003203
	ST DEV	0.005814	0.077352	0.008782	0.042426	0.000203	0.021408	0.011751	0.005126	0.030631	0.093932	0.019934	0.058013	0.01048	0.018525	0.001543
P_108	AVG	0.047705	0.675527	0.050795	0.079094	0.011884	0.199222	0.213917	0.053639	0.101533	0.329799	0.060953	0.553275	0.038384	0.028381	0.034811
	ST DEV	0.006617	0.054298	0.003118	0.013815	0.00073	0.033521	0.039686	0.000968	0.036735	0.044273	0.04549	0.001585	0.005249	0.002108	0.000342
P_110	AVG	0.020449	0.493865	0.006904	0.182021	0.027539	0.206962	0.411476	0.031048	0.095646	0.518653	0.127224	0.232188	0.043184	0.00097	0.003088
	ST DEV	0.00449	0.05655	0.000995	0.112679	0.003752	0.012133	0.061763	0.002532	0.01025	0.080084	0.102577	0.077262	0.007877	0.000306	0.000185
P_111	AVG	0.835121	0.000624	0.025329	0.096103	0.069432	0.219241	0.999761	0.180151	0.066762	0.250437	0.066693	0.490225	nd	nd	0.003852
	ST DEV	0.165722	0.000422	0.003374	0.012007	0.022409	0.043529	0.209592	0.080367	0.013283	0.009998	0.006218	0.112008			0.000671
P_112	AVG	0.012324	0.512178	0.010518	0.175101	0.011342	0.034511	0.180315	0.009022	0.064744	0.393298	0.003302	0.150647	0.035084	0.058776	0.023588
	ST DEV	0.00132	0.087746	0.004856	0.046953	0.001291	0.006477	0.029352	0.001679	0.002655	0.097953	0.001598	0.003649	0.002782	0.005987	0.001979
P_113	AVG	0.042528	0.976166	0.030206	0.271265	0.070861	0.216963	1.07706	0.068262	0.032274	0.455501	0.023982	0.524482	0.169535	0.075479	0.069064
	ST DEV	0.002496	0.209546	0.00063	0.043916	0.026027	0.09854	0.405417	0.01903	0.001987	0.071841	0.000739	0.121642	0.003165	0.011871	0.028622
P_114	AVG	0.006328	0.393619	0.009231	0.090561	0.023723	0.061873	0.344761	0.010771	0.113488	0.663529	0.084566	0.140145	0.063049	0.020786	0.012451
	ST DEV	0.000951	0.032925	0.003508	0.031319	0.011565	0.002938	0.158453	0.006052	0.048497	0.158655	0.047452	0.055648	0.000981	0.01842	0.007923
P_115	AVG	0.017292	0.403838	0.029547	0.11212	0.02499	0.08149	0.287595	0.023342	0.097934	0.251324	0.060633	0.286164	0.053025	0.006513	0.014415
	ST DEV	0.010865	0.060256	0.026813	0.045632	0.005503	0.047301	0.018844	0.018674	0.025314	0.039478	0.031849	0.087986	0.017435	0.004775	0.011615
P_116	AVG	0.011002	0.511524	0.025983	0.092556	0.014938	0.106036	0.250575	0.011893	0.068217	0.322498	0.066345	0.509121	0.039576	0.042373	0.066647
	ST DEV	0.001212	0.011794	0.014245	0.021196	0.007596	0.104908	0.146657	0.013471	0.016258	0.097775	0.009795	0.057833	0.003658	0.01849	0.032648
P_117	AVG	0.032957	0.716992	0.014549	0.112266	0.012448	0.126526	0.163035	0.04189	0.068301	0.219826	0.092782	0.375193	0.077806	0.011908	0.006798
	ST DEV	0.001755	0.108228	0.003542	0.05048	0.000814	0.014148	0.012998	0.009332	0.011391	0.036068	0.068974	0.054132	0.00595	0.001211	0.005613
P_118	AVG	0.025795	0.532815	0.022079	0.043355	0.020317	0.106151	0.270353	0.021011	0.149955	0.221239	0.03501	0.154328	0.037261	0.015883	0.008942
	ST DEV	0.005554	0.044103	0.006425	0.002455	0.005489	0.009551	0.049841	0.004273	0.011181	0.029714	0.02007	0.025494	0.00043	0.002211	0.004792
P_119	AVG	0.797827	0.009163	0.061508	0.166826	0.073269	0.211274	0.906695	0.190139	0.142009	0.260011	0.017203	0.576779	nd	0.046006	0.039767
	ST DEV	0.013486	0.012218	0.003801	0.072194	0.001241	0.025067	0.231128	0.020368	0.047152	0.015695	0.011991	0.193107		0.005271	0.003643
P_119B	AVG	0.639613	0.001815	0.049529	0.109798	0.113915	0.285782	1.19823	0.13006	0.097632	0.387459	0.059205	0.29195	nd	0.028915	0.030511
	ST DEV	0.187851	0.000888	0.012125	0.029855	0.019337	0.036983	0.224957	0.00403	0.004161	0.078232	0.01724	0.105739		0.015601	0.01071
P_120	AVG	0.336979	nd	0.017968	nd	0.118657	0.274175	1.6235	0.130006	0.114947	1.08898	0.031631	0.335727	nd	0.076087	0.011088
	ST DEV	0.127937		0.00293		0.026983	0.05533	0.070285	0.062285	0.012969	0.51929	0.00931	0.084189		0.038903	0.001982
P_121	AVG	0.795519	nd	0.022617	0.245104	0.182342	0.295013	1.53402	0.064766	0.01292	1.80251	0.095412	0.151237	nd	0.046343	0.02724
	ST DEV	0.151912		0.006196	0.080103	0.044464	0.089245	0.342646	0.003454	0.004122	0.140189	0.025202	0.030049		0.001277	0.00508
P_122	AVG	0.49309	0.000463	0.02785	0.208518	0.141537	0.19067	1.27674	0.055803	0.050356	1.0134	0.041654	0.228465	nd	0.011388	0.021091
	ST DEV	0.181264	0.000275	0.005853	0.119883	0.013899	0.096554	0.209877	0.011065	0.013531	0.158854	0.017916	0.03107		0.001299	0.003075
P_123	AVG	0.027112	0.665513	0.020555	0.108037	0.0135	0.122198	0.218675	0.014754	0.157149	0.14426	0.066373	0.238777	0.053573	0.059905	0.021643
	ST DEV	0.001969	0.044868	0.002034	0.025868	0.0029	0.050328	0.032642	0.001284	0.059647	0.027446	0.002548	0.051993	0.018045	0.009925	0.005237
P_124	AVG	0.32376	nd	0.016732	nd	0.061474	0.137662	0.64598	0.070148	0.091482	0.778992	0.059156	0.451495	nd	0.051616	0.006777
	ST DEV	0.058104		0.013432		0.00797	0.015569	0.215573	0.015167	0.018705	0.08581	0.030149	0.013722		0.043392	0.006099
P_125	AVG	0.023195	0.548794	0.016691	0.084657	0.0227	0.140568	0.305771	0.029301	0.142886	0.335953	0.104021	0.273268	0.03101	0.006963	0.003619
	ST DEV	0.009568	0.085519	0.007978	0.02496	0.004059	0.011588	0.048603	0.004415	0.102152	0.067361	0.053225	0.112332	0.001296	0.000571	0.001625
P_126	AVG	0.025297	0.534394	0.026877	0.188941	0.024214	0.295702	0.305071	0.078443	0.092558	0.797145	0.050426	0.593876	0.099367	0.039219	0.039296
	ST DEV	0.008963	0.11869	0.013011	0.037663	0.002583	0.055509	0.047978	0.007353	0.007208	0.108648	0.026707	0.170777	0.01019	0.012756	0.017074
P_127	AVG	0.281695	0.000425	0.02975	0.422981	0.308507	0.305964	1.89426	0.041545	0.050658	1.75313	0.074673	0.5884	nd	0.080769	0.0559
	ST DEV	0.061191	0.000197	0.011255	0.264175	0.036351	0.123664	0.374539	0.033064	0.049077	0.308665	0.029921	0.309375		0.055134	0.047886
P_128	AVG	0.728687	nd	0.03264	0.165934	0.054073	0.283644	0.85407	0.139375	0.099976	0.349609	0.068811	0.371044	nd	0.040026	0.029101
	ST DEV	0.15669		0.017146	0.010933	0.058286	0.095239	0.650731	0.016934	0.034639	0.007145	0.033068	0.020984		0.029548	0.023841
P_129	AVG	0.707061	0.001888	0.076114	0.08008	0.018013	0.380079	0.377395	0.241522	0.054326	0.987711	0.072989	0.134769	nd	0.05051	0.086114
	ST DEV	0.016301	0.000141	0.010061	0.004878	0.004651	0.001434	0.139581	0.076632	0.025872	0.223403	0.040099	0.019886		0.002917	0.00799
P_130	AVG	0.033531	0.575528	0.037456	0.083019	0.07515	0.214504	0.942372	0.035169	0.079461	0.51932	0.046403	0.545718	0.07609	0.040723	0.027259
	ST DEV	0.000677	0.176848	0.023698	0.006128	0.028302	0.119053	0.40732	0.025798	0.021319	0.335756	0.012721	0.178902	0.009051	0.027496	0.026895
P_131	AVG	0.011835	0.541413	0.016303	0.177516	0.014039	0.18004	0.303198	0.034788	0.034928	0.406013	0.078531	0.402036	0.046585	0.116125	0.112017
	ST DEV	0.002042	0.101151	0.006024	0.035807	0.00306	0.037617	0.108084	0.010498	0.00564	0.078471	0.027493	0.069659	0.014863	0.029509	0.028252
P_132	AVG	0.012519	0.457116	0.005333	nd	0.038811	0.180402	0.353744	0.090939	0.12308	0.295077	0.035153	0.192782	0.018954	0.014405	0.002992
	ST DEV	0.004508	0.066125	0.000654		0.007644	0.041194	0.08617	0.020599	0.010241	0.017573	0.013629	0.055079	0.010527	0.003046	0.0008
P_133	AVG	0.755269	0.000796	0.042891	0.351808	0.144613	0.256182	1.12158	0.089664	0.020943	1.50345	0.052885	0.150105	nd	0.077714	0.066226
	ST DEV	0.005787	0.000675	0.002803	0.120086	0.046725	0.018464	0.316122	0.048097	0.002927	0.124028	0.025164	0.056153		0.007407	0.014207
P_135	AVG	0.012588	0.389878	0.012029	0.081096	0.035814	0.113792	0.456648	0.030225	0.060205	0.311362	0.026076	0.235948	0.02598	0.005747	0.006089
	ST DEV	0.004576	0.004108	0.006585	0.013946	0.004022	0.034179	0.054786	0.005245	0.051801	0.069531	0.001034	0.020365	0.00617	0.004165	0.001908
P_136	AVG	0.504169	0.001082	0.020917	0.168678	0.17018	0.20331	1.4829	0.107791	0.070704	0.5229	0.115003	0.408949	nd	0.005232	0.010526
	ST DEV	0.138757	0.000444	0.001807	0.001318	0.016706	0.050739	0.32371	0.072309	0.014712	0.02662	0.024324	0.137186		0.00097	0.00328
P_137	AVG	0.046919	0.724643	0.047365	0.20106	0.012493	0.166298	0.195455	0.045617	0.111466	0.220448	0.010626	0.77397	0.059198	0.040264	0.061956
	ST DEV	0.002269	0.134465	0.012014	0.019631	0.000268	0.020929	0.044268	0.005223	0.065122	0.026419	0.004208	0.074605	0.001348	0.002769	0.019087
P_138	AVG	0.014807	0.591452	0.041377	0.05911	0.081355	0.135363	0.86272	0.04129	0.120736	0.187808	0.022336	0.476959	0.069908	0.091173	0.032181
	ST DEV	0.003429	0.150621	0.022166	0.00315	0.006322	0.004789	0.059495	0.006278	0.034467	3e-06	0.001387	0.18716	0.000643	0.077744	0.036402
P_138B	AVG	0.012171	0.538024	0.025273	0.085015	0.010991	0.087678	0.148143	0.036936	0.062346	0.328966	0.014212	0.284183	0.054483	0.114986	0.032675
	ST DEV	0.001428	0.016982	0.000629	0.052885	0.00042	0.046143	0.014045	0.019028	0.005623	0.070635	0.01368	0.09253	0.010486	0.008205	0.007186
P_139	AVG	0.392296	nd	0.018057	0.051532	0.022772	0.211451	0.321176	0.125483	0.102533	0.547901	0.110189	0.158794	nd	0.016422	0.004215
	ST DEV	0.083449		0.006801	0.027735	0.00487	0.059224	0.041432	0.01412	0.012362	0.061583	0.051655	0.017369		0.003468	0.002201
P_140	AVG	0.019107	0.619619	0.01578	0.15798	0.017056	0.090357	0.288658	0.013042	0.063837	0.209299	0.068425	0.30378	0.08224	0.032118	0.011715
	ST DEV	0.00567	0.158852	0.0046	0.11456	0.002757	0.007281	0.054239	0.010619	0.026792	0.014804	0.024295	0.25113	0.000322	0.025454	0.003785
P_141	AVG	0.007358	0.400953	0.006189	0.223975	0.069168	0.059712	0.541825	0.006387	0.160435	0.206135	0.075808	0.630831	0.026502	0.026615	0.010974
	ST DEV	0.002349	0.099938	0.000621	0.06975	0.074343	0.003628	0.444908	0.001263	0.107545	0.067042	0.011605	0.109455	0.0026	0.004802	0.007904
P_142	AVG	0.011911	0.705226	0.015196	nd	0.015808	0.218648	0.194031	0.033712	0.145475	0.532191	0.11045	0.542126	0.046654	0.054879	0.022914
	ST DEV	0.006548	0.249348	0.008182		0.005286	0.053145	0.065924	0.004887	0.06928	0.07485	0.077867	0.102424	0.025249	0.020841	0.009578
P_143	AVG	0.499322	0.00024	0.028621	0.118156	0.070275	0.145836	0.852033	0.108848	0.116891	0.083321	0.015211	0.185905	nd	0.097351	0.031444
	ST DEV	0.310034	2e-06	0.008444	0.029264	0.008467	0.039707	0.268138	0.039172	0.0186	0.051004	0.003762	0.011491		0.009628	0.000785
P_144	AVG	0.788557	0.000906	0.047886	0.174485	0.145333	0.222281	1.18321	0.110047	0.05289	0.91114	0.072315	0.221082	nd	0.041416	0.059427
	ST DEV	0.28501	0.001022	0.00732	0.032727	0.017029	0.010853	0.206789	0.05755	0.011895	0.331716	0.012468	0.035509		0.003319	0.032339
P_145	AVG	0.799592	nd	0.027133	0.576055	0.17229	0.337972	1.83687	0.084185	0.049601	1.12811	0.071762	0.338235	nd	0.029969	0.02894
	ST DEV	0.085998		0.012363	0.042113	0.019369	0.082702	0.302054	0.001905	0.024048	0.501726	0.062153	0.123097		0.012384	0.014335
P_146	AVG	0.606192	0.000365	0.034477	0.277538	0.173674	0.363971	1.4394	0.405404	0.099686	0.860181	0.035578	0.098113	nd	0.019465	0.014055
	ST DEV	0.095308	0.000297	0.012712	0.176897	0.056103	0.051566	0.478172	0.022031	0.000528	0.181592	0.004386	0.016553		0.001048	0.000858
P_148	AVG	0.00476	0.3909	0.007771	0.315713	0.023312	0.100385	0.201806	0.020477	0.255645	0.337013	0.016363	0.234211	0.030518	0.027108	0.007443
	ST DEV	0.00085	0.131551	0.003545	0.271973	0.006707	0.000932	0.029599	0.00815	0.012617	0.081005	0.002193	0.031692	0.001861	0.003255	0.001932
P_149	AVG	0.076476	0.708101	0.022252	0.209793	0.069543	0.191588	0.789931	0.033256	0.034837	0.856144	0.054303	0.16633	0.071166	0.008041	0.036817
	ST DEV	0.042111	0.099961	0.003221	0.017709	0.005074	0.006245	0.213578	0.01482	0.002919	0.413	0.016597	0.037348	0.007695	0.003746	0.030292
P_149B	AVG	0.59609	0.001161	0.027839	0.145721	0.139932	0.178498	1.08604	0.129699	0.175422	0.335193	0.092927	0.475772	nd	0.079218	0.021938
	ST DEV	0.155177	0.00043	0.005949	0.019909	0.007504	0.012945	0.266326	0.033995	0.052987	0.050368	0.025861	0.153813		0.012779	0.000625
P_149C	AVG	0.021682	0.655462	0.010738	0.254765	0.073421	0.181962	0.679298	0.031846	0.095391	0.623564	0.112389	0.206753	0.069834	0.018745	0.008976
	ST DEV	0.009857	0.265901	0.002915	0.002563	0.087147	0.011825	0.701162	0.002797	0.030886	0.336608	0.146568	0.021002	0.019624	0.005348	0.005954
P_150	AVG	0.326946	nd	0.036465	0.127681	0.195223	0.22297	1.14652	0.092099	0.13245	0.477798	0.011096	0.299403	nd	0.055537	0.034613
	ST DEV	0.104112		0.004394	0.077601	0.000936	0.121506	0.10769	0.065424	0.021396	0.127771	0.006302	0.243963		0.012431	0.019341
P_151	AVG	nd	0.34121	0.021083	0.044757	0.023292	0.053887	0.271827	0.015591	0.114265	0.243152	0.027644	0.366552	0.016208	0.035998	0.010411
	ST DEV		0.119436	0.011143	0.020974	0.000648	0.060316	0.00902	0.015588	0.044058	0.019269	0.00255	0.022069	0.007156	0.008924	0.007826
P_152	AVG	0.022757	0.556814	0.05312	0.26797	0.021339	0.241173	0.283042	0.089623	0.083222	0.67724	0.043208	0.266602	0.051217	0.070294	0.105685
	ST DEV	0.017606	0.038404	0.013731	0.025719	0.001645	0.080033	0.036317	0.081501	0.018192	0.082928	0.000498	0.007053	0.000405	0.00056	0.025556
P_153	AVG	0.018966	0.474912	0.018705	nd	0.013786	0.277488	0.227549	0.158378	0.080378	0.67064	0.019605	0.20983	0.017406	0.013527	0.031478
	ST DEV	0.002982	0.063805	0.007584		0.001196	0.031917	0.044964	0.014131	0.013404	0.100271	0.002711	0.014268	0.001506	0.004658	0.020343
P_154	AVG	0.568342	0.001363	0.056706	0.28893	0.014425	0.206213	0.244399	0.088065	0.03715	0.106761	0.016961	0.16185	nd	0.049634	0.026845
	ST DEV	0.19761	0.000466	0.014174	0.17691	0.002341	0.016714	0.002955	0.032017	0.002809	0.029965	0.008412	0.028293		0.013618	0.016521
P_155	AVG	0.026514	0.559025	0.046468	0.172683	0.108356	0.26853	1.05154	0.075525	0.122427	0.581326	0.057852	0.634088	0.102194	0.045193	0.060444
	ST DEV	0.011503	0.034319	0.010427	0.054973	0.03093	0.144826	0.23216	0.001702	0.035969	0.071152	0.022251	0.287789	0.027138	0.00354	0.0092
P_157	AVG	0.596478	0.000465	0.039038	0.23422	0.022932	0.376426	0.357203	0.151577	0.03621	1.25676	0.076031	0.033634	nd	0.04787	0.047715
	ST DEV	0.073599	5.2e-05	0.001788	0.007214	0.009766	0.226365	0.122737	0.038711	0.006349	0.584318	0.006297	0.017255		0.035525	0.029919
P_158	AVG	0.549289	0.000877	nd	0.237819	0.012169	0.285376	0.228943	0.14121	0.091119	0.581231	0.077049	0.207554	nd	0.076022	0.050176
	ST DEV	0.211641	0.0003		0.044363	0.003123	0.095199	0.048123	0.08582	0.006905	0.206358	0.027714	0.045527		0.01573	0.044979
P_159	AVG	0.44533	0.001408	0.035768	0.161115	0.146509	0.229659	1.50055	0.106867	0.030799	0.741994	0.042968	0.2106	nd	0.109617	0.061013
	ST DEV	0.064714	0.000355	0.011591	0.034204	0.031498	0.098761	0.450755	0.042847	0.020196	0.172406	0.012015	0.035761		0.026316	0.054923
P_160	AVG	0.45781	nd	0.031083	0.261789	0.040477	0.226096	0.285233	0.118594	0.019976	1.35214	0.072091	0.39117	nd	0.006504	0.016362
	ST DEV	0.127828		0.007108	0.051448	0.025611	0.041214	0.092324	0.079384	0.010233	0.32755	0.002873	0.202554		0.000817	0.007291
P_161	AVG	0.009368	0.377433	0.027435	0.117745	0.016538	0.094258	0.250318	0.016624	0.068349	0.754065	0.079551	0.323032	0.027404	0.018691	0.033964
	ST DEV	0.002421	0.118371	0.001463	0.036581	0.001928	0.036913	0.033066	0.009319	0.009221	0.180497	0.035685	0.087077	0.002487	0.000326	0.011329
P_162	AVG	0.418495	0.000988	0.038553	0.314886	0.014229	0.176386	0.281703	0.028685	0.026618	0.702169	0.068009	0.241917	nd	0.050984	0.042976
	ST DEV	0.087502	9.6e-05	0.031622	0.151173	0.002878	0.1243	0.092297	0.009958	0.030513	0.25155	0.019789	0.142898		0.01415	0.045573
P_163	AVG	0.398421	nd	0.019717	0.383552	0.031777	0.264578	1.22398	0.068976	0.022352	0.352344	0.007661	0.145507	nd	0.070273	0.031696
	ST DEV	0.235497		0.005118	0.079629	0.000227	0.081325	0.048049	0.001237	0.004336	0.070021	0.001999	0.034546		0.013243	0.01084
P_164	AVG	0.014948	0.505323	0.021154	0.278294	0.018929	0.191543	0.301942	0.046505	0.042875	0.710062	0.030552	0.226188	0.061009	0.080023	0.029954
	ST DEV	0.004161	0.066345	0.00913	0.064036	0.007015	0.089023	0.075783	0.018384	0.001261	0.023308	0.011997	0.00863	0.00395	0.025648	0.015886
P_166	AVG	0.012383	0.489123	0.013918	0.243228	0.00914	0.058412	0.19556	0.010187	0.021145	0.278331	0.026468	0.078569	0.053473	0.013856	0.003369
	ST DEV	0.003868	0.032992	0.006496	0.046628	0.000369	0.002407	0.020633	0.001637	0.002272	0.080477	0.001018	0.010306	0.003416	0.003343	0.00127
P_167	AVG	0.907515	0.001779	0.02786	0.473561	0.154625	0.276236	1.59126	0.105469	0.105994	1.45907	0.051321	0.261272	6.6e-05	0.012706	0.017539
	ST DEV	0.102204	0.000497	0.010351	0.232941	0.020595	0.139507	0.559893	0.015833	0.091343	1.09576	0.012698	0.16661	2.4e-05	0.004338	0.00473
P_168	AVG	0.493832	0.031827	0.017428	0.180677	0.022468	0.095261	0.375649	0.060616	0.038376	0.470763	0.073256	0.182378	0.008093	0.011915	0.010148
	ST DEV	0.152092	0.019499	0.004852	0.020998	0.004467	0.031691	0.007698	0.023775	0.011296	0.021159	0.006644	0.050039	0.00698	0.003037	0.000107
P_169	AVG	0.014818	0.603525	0.01762	0.381452	0.022893	0.185514	0.40337	0.028266	0.043534	0.511666	0.065857	0.310734	0.0551	0.030502	0.030348
	ST DEV	0.001923	0.044158	0.013764	0.13273	0.009186	0.033543	0.13284	0.001644	0.007618	0.089932	0.046835	0.11592	0.009284	0.029335	0.03267
P_170	AVG	0.008863	0.357466	0.025426	0.211056	0.170932	0.234346	0.855019	0.079711	0.08627	nd	0.040275	0.415172	0.01663	0.086626	0.052214
	ST DEV	0.00234	0.016318	0.000234	0.017955	0.039138	0.133435	0.362095	0.040729	0.026976		0.005734	0.050747	0.003592	0.00064	0.021087

## Sheet: S4
Supplemenary Table S4 Metabolite codes, skewness (in the RILs population, with standard error SE), kurtosis (in the RILs population, with standard error SE), broad sense heritability (h2) and the number of transgressive RILs for the traits in the study are reported.
	Metabolite	Code	Skewness/SE	Kurtosis/SE	h2	Transg. vs 305E40	Transg. vs 67/3
FLESH
Untargeted	pseudoprotodioscin	F-PPROT	0.88/0.19	0.41/0.38	0.73	7	5
	solamargine	F-SOLM	4.81/0.19	29.55/0.38	0.88	58	59
	malonyl-solamargine	F-MSOLM	4.19/0.19	22.90/0.38	0.83	45	19
	n,n'-dicaffeoylspermidine	F-DCASP	1.18/0.19	0.98/0.38	0.90	21	0
	n,n'-dicaffeoylspermidine iso	F-DCASP2	1.10/0.19	0.59/0.38	0.89	28	0
Targeted	demissine	F-DEM	2.16/0.19	4.56/0.39	0.92	0	26
	solasonine	F-SOLA	4.35/0.19	23.16/0.88	0.88	62	44
PEEL
Untargeted	delphinidin-3-rutinoside	P-D3R	0.72/0.19	-1.05/0.95	0.95	46	0
	nasunin	P-NAN	-0.13/0.20	-1.15/0.40	0.95	0	2
	rutin	P-RUT	1.45/0.19	2.82/0.39	0.76	21	0
	pseudoprotodioscin	P-PPROT	1.13/0.20	1.46/0.40	0.69	0	0
	n,n'-dicaffeoylspermidine	P-DCASP	1.12/0.19	0.99/0.38	0.93	2	6
	n-caffeoylputrescine	P-CAPTR	0.48/0.19	0.15/0.38	0.70	0	20
	n-dihydrocaffeoyl-n'-caffeoylspermidine	P-DHCNCS	0.67/0.19	-0.78/0.38	0.88	45	1
	n-coumaroylputrescine	P-COPTR	2.14/0.19	7.69/0.38	0.89	8	13
	glutamine	P-GLUT	7.93/0.19	82.75/0.38	0.73	1	3
	unknown	P-UNKN	1.24/0.19	1.28/0.38	0.76	133	0
	trigonelline	P-TRIG	0.65/0.19	1.13/0.38	0.48	55	0
	acetylcholine	P-ACH	1.00/0.19	0.76/0.38	0.83	3	7
Targeted	delphinidin 3-O-D-glucoside-5-(6-coumaroyl-D-glucoside)	P-D3G5CG	0.92/0.24	1.76/0.48	0.92	0	31
	Kaempferol 3-O-beta-D-sophoroside	P-KSOPH	1.14/0.19	1.23/0.39	0.82	77	0
	kaempferol-3-O-D-glucoside	P-K3G	1.49/0.19	2.14/0.38	0.73	29	0
