# Supplementary material for: An Eggplant Recombinant Inbred Population Allows the Discovery of Metabolic QTLs Controlling Fruit Nutritional Quality
Source: Front Plant Sci. 2021 May 17;12:638195. doi: 10.3389/fpls.2021.638195 (PMC8166230; doi:10.3389/fpls.2021.638195)
Supplement: Supplementary file 3 [file Data_Sheet_2.xlsx]

## Sheet: Foglio1
CH	Start			Anno
SMEL3Ch01	91035	93317	ID=SMEL_001g114990.1	Note=Similar to FRS5: Protein FAR1-RELATED SEQUENCE 5 (Arabidopsis thaliana OX%3D3702)
SMEL3Ch01	102056	104137	ID=SMEL_001g115000.1	Note=Similar to FRS5: Protein FAR1-RELATED SEQUENCE 5 (Arabidopsis thaliana OX%3D3702)
SMEL3Ch01	123478	132201	ID=SMEL_001g115010.1	Note=Similar to CLC-E: Chloride channel protein CLC-e (Arabidopsis thaliana OX%3D3702)
SMEL3Ch01	146117	146913	ID=SMEL_001g115020.1	Note=Similar to CLC-E: Chloride channel protein CLC-e (Arabidopsis thaliana OX%3D3702)
SMEL3Ch01	154629	172891	ID=SMEL_001g115030.1	Note=Similar to Glutamate--tRNA ligase%2C chloroplastic/mitochondrial (Nicotiana tabacum OX%3D4097)
SMEL3Ch01	180342	183390	ID=SMEL_001g115040.1	Note=Similar to Glutamate--tRNA ligase%2C chloroplastic/mitochondrial (Nicotiana tabacum OX%3D4097)
SMEL3Ch01	208617	213078	ID=SMEL_001g115050.1	Note=Protein of unknown function
SMEL3Ch01	222478	240866	ID=SMEL_001g115060.1	Note=Similar to At2g17340: Damage-control phosphatase At2g17340 (Arabidopsis thaliana OX%3D3702)
SMEL3Ch01	241445	241903	ID=SMEL_001g115070.1	Note=Protein of unknown function
SMEL3Ch01	242362	248584	ID=SMEL_001g115080.1	Note=Similar to CPK5: Calcium-dependent protein kinase 5 (Solanum tuberosum OX%3D4113)
SMEL3Ch01	250960	252178	ID=SMEL_001g115090.1	Note=Similar to MSSP3: Monosaccharide-sensing protein 3 (Arabidopsis thaliana OX%3D3702)
SMEL3Ch01	264572	268354	ID=SMEL_001g115100.1	Note=Similar to MSSP2: Monosaccharide-sensing protein 2 (Arabidopsis thaliana OX%3D3702)
SMEL3Ch01	269380	271526	ID=SMEL_001g115110.1	Note=Similar to HSK: Homoserine kinase (Arabidopsis thaliana OX%3D3702)
SMEL3Ch01	271721	275165	ID=SMEL_001g115120.1	Note=Similar to GLR3.2: Glutamate receptor 3.2 (Arabidopsis thaliana OX%3D3702)
SMEL3Ch01	278503	294136	ID=SMEL_001g115130.1	Note=Similar to GNTI: Alpha-1%2C3-mannosyl-glycoprotein 2-beta-N-acetylglucosaminyltransferase (Arabidopsis thaliana OX%3D3702)
SMEL3Ch01	295011	295433	ID=SMEL_001g115140.1	Note=Similar to MT4B: Metallothionein-like protein 4B (Arabidopsis thaliana OX%3D3702)
SMEL3Ch01	301098	303060	ID=SMEL_001g115150.1	Note=Similar to PIX13: Probable serine/threonine-protein kinase PIX13 (Arabidopsis thaliana OX%3D3702)
SMEL3Ch01	304658	312163	ID=SMEL_001g115160.1	Note=Similar to GAUT3: Probable galacturonosyltransferase 3 (Arabidopsis thaliana OX%3D3702)
SMEL3Ch01	313128	318764	ID=SMEL_001g115170.1	Note=Similar to NLP2: Protein NLP2 (Arabidopsis thaliana OX%3D3702)
SMEL3Ch01	326458	334977	ID=SMEL_001g115180.1	Note=Protein of unknown function
SMEL3Ch01	337151	339994	ID=SMEL_001g115190.1	Note=Protein of unknown function
SMEL3Ch01	341832	343774	ID=SMEL_001g115200.1	Note=Similar to SLY1: SEC1 family transport protein SLY1 (Arabidopsis thaliana OX%3D3702)
SMEL3Ch01	343814	350889	ID=SMEL_001g115210.1	Note=Similar to FMO1: Probable flavin-containing monooxygenase 1 (Arabidopsis thaliana OX%3D3702)
SMEL3Ch01	366421	370679	ID=SMEL_001g115220.1	Note=Similar to FMO1: Probable flavin-containing monooxygenase 1 (Arabidopsis thaliana OX%3D3702)
SMEL3Ch01	374199	376352	ID=SMEL_001g115230.1	Note=Similar to FMO1: Probable flavin-containing monooxygenase 1 (Arabidopsis thaliana OX%3D3702)
SMEL3Ch01	377342	387952	ID=SMEL_001g115240.1	Note=Similar to DTX45: Protein DETOXIFICATION 45%2C chloroplastic (Arabidopsis thaliana OX%3D3702)
SMEL3Ch01	389612	392487	ID=SMEL_001g115250.1	Note=Similar to LYM2: LysM domain-containing GPI-anchored protein 2 (Arabidopsis thaliana OX%3D3702)
SMEL3Ch01	394500	401875	ID=SMEL_001g115260.1	Note=Similar to GPAT9: Glycerol-3-phosphate acyltransferase 9 (Arabidopsis thaliana OX%3D3702)
SMEL3Ch01	407794	411767	ID=SMEL_001g115270.1	Note=Similar to OFUT6: O-fucosyltransferase 6 (Arabidopsis thaliana OX%3D3702)
SMEL3Ch01	412252	415970	ID=SMEL_001g115280.1	Note=Similar to DVR: Divinyl chlorophyllide a 8-vinyl-reductase%2C chloroplastic (Zea mays OX%3D4577)
SMEL3Ch01	423762	430995	ID=SMEL_001g115290.1	Note=Similar to NRG2: Nitrate regulatory gene2 protein (Arabidopsis thaliana OX%3D3702)
SMEL3Ch01	432660	434711	ID=SMEL_001g115300.1	Note=Similar to NMAT1: Nuclear intron maturase 1%2C mitochondrial (Arabidopsis thaliana OX%3D3702)
SMEL3Ch01	438849	439525	ID=SMEL_001g115310.1	Note=Protein of unknown function
SMEL3Ch01	440897	441730	ID=SMEL_001g115320.1	Note=Protein of unknown function
SMEL3Ch01	442996	453610	ID=SMEL_001g115330.1	Note=Similar to At4g35850: Pentatricopeptide repeat-containing protein At4g35850%2C mitochondrial (Arabidopsis thaliana OX%3D3702)
SMEL3Ch01	457131	459848	ID=SMEL_001g115340.1	Note=Protein of unknown function
SMEL3Ch01	464310	466021	ID=SMEL_001g115350.1	Note=Similar to EXLA1: Expansin-like A1 (Arabidopsis thaliana OX%3D3702)
SMEL3Ch01	476037	486847	ID=SMEL_001g115360.1	Note=Similar to POPTRDRAFT_821063: Alanine--tRNA ligase%2C chloroplastic/mitochondrial (Populus trichocarpa OX%3D3694)
SMEL3Ch01	492574	495678	ID=SMEL_001g115370.1	Note=Similar to AATL1: Lysine histidine transporter-like 8 (Arabidopsis thaliana OX%3D3702)
SMEL3Ch01	497310	498289	ID=SMEL_001g115380.1	Note=Similar to ERD10: Dehydrin ERD10 (Arabidopsis thaliana OX%3D3702)
SMEL3Ch01	501078	504881	ID=SMEL_001g115390.1	Note=Similar to L-ascorbate oxidase homolog (Nicotiana tabacum OX%3D4097)
SMEL3Ch01	505444	507328	ID=SMEL_001g115400.1	Note=Similar to At5g55050: GDSL esterase/lipase At5g55050 (Arabidopsis thaliana OX%3D3702)
SMEL3Ch01	507983	511369	ID=SMEL_001g115410.1	Note=Similar to RBK1: Receptor-like cytosolic serine/threonine-protein kinase RBK1 (Arabidopsis thaliana OX%3D3702)
SMEL3Ch01	515159	517486	ID=SMEL_001g115420.1	Note=Protein of unknown function
SMEL3Ch01	524363	527844	ID=SMEL_001g115430.1	Note=Similar to ROPGEF1: Rop guanine nucleotide exchange factor 1 (Arabidopsis thaliana OX%3D3702)
SMEL3Ch01	528732	531121	ID=SMEL_001g115440.1	Note=Similar to SKIP23: F-box protein SKIP23 (Arabidopsis thaliana OX%3D3702)
SMEL3Ch01	532295	545940	ID=SMEL_001g115450.1	Note=Similar to IYO: Transcriptional elongation regulator MINIYO (Arabidopsis thaliana OX%3D3702)
SMEL3Ch01	548893	551355	ID=SMEL_001g115460.1	Note=Similar to ASMT: Acetylserotonin O-methyltransferase (Arabidopsis thaliana OX%3D3702)
SMEL3Ch01	551824	558952	ID=SMEL_001g115470.1	Note=Similar to FBL10: F-box/LRR-repeat protein 10 (Arabidopsis thaliana OX%3D3702)
SMEL3Ch01	566529	577261	ID=SMEL_001g115480.1	Note=Similar to STY46: Serine/threonine-protein kinase STY46 (Arabidopsis thaliana OX%3D3702)
SMEL3Ch01	579678	600013	ID=SMEL_001g115490.1	Note=Similar to ATR: Serine/threonine-protein kinase ATR (Arabidopsis thaliana OX%3D3702)
SMEL3Ch01	601702	608527	ID=SMEL_001g115500.1	Note=Protein of unknown function
SMEL3Ch01	611219	612667	ID=SMEL_001g115510.1	Note=Similar to ASPG2: Protein ASPARTIC PROTEASE IN GUARD CELL 2 (Arabidopsis thaliana OX%3D3702)
SMEL3Ch01	612928	616782	ID=SMEL_001g115520.1	Note=Protein of unknown function
SMEL3Ch01	619326	619715	ID=SMEL_001g115530.1	Note=Protein of unknown function
SMEL3Ch01	636005	637078	ID=SMEL_001g115540.1	Note=Similar to SMT2: 24-methylenesterol C-methyltransferase 2 (Arabidopsis thaliana OX%3D3702)
SMEL3Ch01	642522	642920	ID=SMEL_001g115550.1	Note=Protein of unknown function
SMEL3Ch01	647109	647465	ID=SMEL_001g115560.1	Note=Protein of unknown function
SMEL3Ch01	652732	654075	ID=SMEL_001g115570.1	Note=Similar to At1g31830: Probable polyamine transporter At1g31830 (Arabidopsis thaliana OX%3D3702)
SMEL3Ch01	654772	656852	ID=SMEL_001g115580.1	Note=Similar to B'KAPPA: Serine/threonine protein phosphatase 2A 57 kDa regulatory subunit B' kappa isoform (Arabidopsis thaliana OX%3D3702)
SMEL3Ch01	656821	677194	ID=SMEL_001g115590.1	Note=Similar to TRN1: Transportin-1 (Arabidopsis thaliana OX%3D3702)
SMEL3Ch01	679904	683644	ID=SMEL_001g115600.1	Note=Protein of unknown function
SMEL3Ch01	684815	686994	ID=SMEL_001g115610.1	Note=Similar to V-type proton ATPase subunit B 2 (Fragment) (Gossypium hirsutum OX%3D3635)
SMEL3Ch01	696543	699671	ID=SMEL_001g115620.1	Note=Similar to CPP1: Protein CHAPERONE-LIKE PROTEIN OF POR1%2C chloroplastic (Nicotiana benthamiana OX%3D4100)
SMEL3Ch01	700074	704277	ID=SMEL_001g115630.1	Note=Similar to NRG2: Nitrate regulatory gene2 protein (Arabidopsis thaliana OX%3D3702)
SMEL3Ch01	708816	717104	ID=SMEL_001g115640.1	Note=Similar to ycf2-A: Protein Ycf2 A (Atropa belladonna OX%3D33113)
SMEL3Ch01	729174	730376	ID=SMEL_001g115650.1	Note=Similar to TA1: Short-chain dehydrogenase reductase ATA1 (Arabidopsis thaliana OX%3D3702)
SMEL3Ch01	733447	741758	ID=SMEL_001g115660.1	Note=Similar to IF3-1: Translation initiation factor IF3-1%2C mitochondrial (Arabidopsis thaliana OX%3D3702)
SMEL3Ch01	742540	746906	ID=SMEL_001g115670.1	Note=Similar to 21D7: Probable 26S proteasome non-ATPase regulatory subunit 3 (Nicotiana tabacum OX%3D4097)
SMEL3Ch01	747523	751620	ID=SMEL_001g115680.1	Note=Similar to 21D7: Probable 26S proteasome non-ATPase regulatory subunit 3 (Nicotiana tabacum OX%3D4097)
SMEL3Ch01	751825	755742	ID=SMEL_001g115690.1	Note=Protein of unknown function
SMEL3Ch01	758347	768607	ID=SMEL_001g115700.1	Note=Similar to UBC23: Probable ubiquitin-conjugating enzyme E2 23 (Arabidopsis thaliana OX%3D3702)
SMEL3Ch01	769527	769985	ID=SMEL_001g115710.1	Note=Protein of unknown function
SMEL3Ch01	771337	772912	ID=SMEL_001g115720.1	Note=Similar to PIP2-7: Aquaporin PIP2-7 (Arabidopsis thaliana OX%3D3702)
SMEL3Ch01	789334	791524	ID=SMEL_001g115730.1	Note=Similar to SKP1B: SKP1-like protein 1B (Arabidopsis thaliana OX%3D3702)
SMEL3Ch01	793341	796369	ID=SMEL_001g115740.1	Note=Similar to HPR: Glycerate dehydrogenase HPR%2C peroxisomal (Arabidopsis thaliana OX%3D3702)
SMEL3Ch01	803676	807993	ID=SMEL_001g115750.1	Note=Protein of unknown function
SMEL3Ch01	810067	811144	ID=SMEL_001g115760.1	Note=Similar to BRG3: Probable BOI-related E3 ubiquitin-protein ligase 3 (Arabidopsis thaliana OX%3D3702)
SMEL3Ch01	831060	834030	ID=SMEL_001g115770.1	Note=Similar to HIPP26: Heavy metal-associated isoprenylated plant protein 26 (Arabidopsis thaliana OX%3D3702)
SMEL3Ch01	835142	838059	ID=SMEL_001g115780.1	Note=Similar to MSI2: WD-40 repeat-containing protein MSI2 (Arabidopsis thaliana OX%3D3702)
SMEL3Ch01	844644	845456	ID=SMEL_001g115790.1	Note=Similar to BZIP23: Basic leucine zipper 23 (Arabidopsis thaliana OX%3D3702)
SMEL3Ch01	853231	857175	ID=SMEL_001g115800.1	Note=Similar to PERK13: Proline-rich receptor-like protein kinase PERK13 (Arabidopsis thaliana OX%3D3702)
SMEL3Ch01	864891	870540	ID=SMEL_001g115810.1	Note=Similar to ARAC3: Rac-like GTP-binding protein ARAC3 (Arabidopsis thaliana OX%3D3702)
SMEL3Ch01	874324	878076	ID=SMEL_001g115820.1	Note=Protein of unknown function
SMEL3Ch01	880214	884960	ID=SMEL_001g115830.1	Note=Similar to BGAL14: Beta-galactosidase 14 (Arabidopsis thaliana OX%3D3702)
SMEL3Ch01	888629	900514	ID=SMEL_001g115840.1	Note=Similar to UPL3: E3 ubiquitin-protein ligase UPL3 (Arabidopsis thaliana OX%3D3702)
SMEL3Ch01	904696	916094	ID=SMEL_001g115850.1	Note=Similar to SYT1: Synaptotagmin-1 (Arabidopsis thaliana OX%3D3702)
SMEL3Ch01	916742	923725	ID=SMEL_001g115860.1	Note=Similar to APX3: L-ascorbate peroxidase 3 (Arabidopsis thaliana OX%3D3702)
SMEL3Ch01	927220	929623	ID=SMEL_001g115870.1	Note=Similar to MYB308: Myb-related protein 308 (Antirrhinum majus OX%3D4151)
SMEL3Ch01	946061	950225	ID=SMEL_001g115880.1	Note=Similar to At2g16880: Pentatricopeptide repeat-containing protein At2g16880 (Arabidopsis thaliana OX%3D3702)
SMEL3Ch01	952651	957502	ID=SMEL_001g115890.1	Note=Similar to PAD1: Proteasome subunit alpha type-7 (Solanum lycopersicum OX%3D4081)
SMEL3Ch01	958646	961679	ID=SMEL_001g115900.1	Note=Similar to ERD7: Protein EARLY-RESPONSIVE TO DEHYDRATION 7%2C chloroplastic (Arabidopsis thaliana OX%3D3702)
SMEL3Ch01	961867	963804	ID=SMEL_001g115910.1	Note=Similar to PCMP-E84: Pentatricopeptide repeat-containing protein At3g49740 (Arabidopsis thaliana OX%3D3702)
SMEL3Ch01	964709	975347	ID=SMEL_001g115920.1	Note=Similar to RPL10A: 60S ribosomal protein L10a (Chlamydomonas reinhardtii OX%3D3055)
SMEL3Ch01	1017457	1019778	ID=SMEL_001g115930.1	Note=Similar to SBT1.6: Subtilisin-like protease SBT1.6 (Arabidopsis thaliana OX%3D3702)
SMEL3Ch01	1027890	1029363	ID=SMEL_001g115940.1	Note=Similar to ADF5: Actin-depolymerizing factor 5 (Arabidopsis thaliana OX%3D3702)
SMEL3Ch01	1033656	1038873	ID=SMEL_001g115950.1	Note=Similar to CHER1: Choline transporter protein 1 (Arabidopsis thaliana OX%3D3702)
SMEL3Ch01	1039548	1043968	ID=SMEL_001g115960.1	Note=Similar to CYP21-1: Peptidyl-prolyl cis-trans isomerase CYP21-1 (Arabidopsis thaliana OX%3D3702)
SMEL3Ch01	1052542	1056340	ID=SMEL_001g115970.1	Note=Similar to NFD4: Protein NUCLEAR FUSION DEFECTIVE 4 (Arabidopsis thaliana OX%3D3702)
SMEL3Ch01	1056513	1061730	ID=SMEL_001g115980.1	Note=Protein of unknown function
SMEL3Ch01	1062927	1065583	ID=SMEL_001g115990.1	Note=Similar to XYN5: Endo-1%2C4-beta-xylanase 5 (Arabidopsis thaliana OX%3D3702)
SMEL3Ch01	1071092	1073079	ID=SMEL_001g116000.1	Note=Similar to TLP1: Thaumatin-like protein 1 (Arabidopsis thaliana OX%3D3702)
SMEL3Ch01	1075081	1079287	ID=SMEL_001g116010.1	Note=Similar to TLP1: Thaumatin-like protein 1 (Arabidopsis thaliana OX%3D3702)
SMEL3Ch01	1087851	1091808	ID=SMEL_001g116020.1	Note=Similar to LAX5: Auxin transporter-like protein 5 (Medicago truncatula OX%3D3880)
SMEL3Ch01	1102667	1103272	ID=SMEL_001g116030.1	Note=Similar to GRP-2: Glycine-rich protein 2 (Nicotiana sylvestris OX%3D4096)
SMEL3Ch01	1103852	1107030	ID=SMEL_001g116040.1	Note=Protein of unknown function
SMEL3Ch01	1112519	1114029	ID=SMEL_001g116050.1	Note=Protein of unknown function
SMEL3Ch01	1116503	1117860	ID=SMEL_001g116060.1	Note=Protein of unknown function
SMEL3Ch01	1123512	1127639	ID=SMEL_001g116070.1	Note=Similar to TOC120: Translocase of chloroplast 120%2C chloroplastic (Arabidopsis thaliana OX%3D3702)
SMEL3Ch01	1130103	1130621	ID=SMEL_001g116080.1	Note=Similar to DIR23: Dirigent protein 23 (Arabidopsis thaliana OX%3D3702)
SMEL3Ch01	1131449	1133297	ID=SMEL_001g116090.1	Note=Similar to DIR23: Dirigent protein 23 (Arabidopsis thaliana OX%3D3702)
SMEL3Ch01	1135445	1137588	ID=SMEL_001g116100.1	Note=Similar to At4g34880: Probable amidase At4g34880 (Arabidopsis thaliana OX%3D3702)
SMEL3Ch01	1138210	1142940	ID=SMEL_001g116110.1	Note=Similar to At4g34880: Probable amidase At4g34880 (Arabidopsis thaliana OX%3D3702)
SMEL3Ch01	1143408	1145134	ID=SMEL_001g116120.1	Note=Protein of unknown function
SMEL3Ch01	1147711	1150144	ID=SMEL_001g116130.1	Note=Similar to EIF4B3: Eukaryotic translation initiation factor 4B3 (Arabidopsis thaliana OX%3D3702)
SMEL3Ch01	1151437	1158425	ID=SMEL_001g116140.1	Note=Similar to At2g21120: Probable magnesium transporter NIPA6 (Arabidopsis thaliana OX%3D3702)
SMEL3Ch01	1163465	1163980	ID=SMEL_001g116150.1	Note=Similar to CYP: Peptidyl-prolyl cis-trans isomerase (Solanum lycopersicum OX%3D4081)
SMEL3Ch01	1164926	1167229	ID=SMEL_001g116160.1	Note=Similar to PRP2: Proline-rich protein 2 (Arabidopsis thaliana OX%3D3702)
SMEL3Ch01	1170762	1182797	ID=SMEL_001g116170.1	Note=Similar to At2g21160: Translocon-associated protein subunit alpha (Arabidopsis thaliana OX%3D3702)
SMEL3Ch01	1186265	1190666	ID=SMEL_001g116180.1	Note=Similar to BHLH121: Transcription factor bHLH121 (Arabidopsis thaliana OX%3D3702)
SMEL3Ch01	1192068	1200431	ID=SMEL_001g116190.1	Note=Similar to TPIP1: Triosephosphate isomerase%2C chloroplastic (Spinacia oleracea OX%3D3562)
SMEL3Ch01	1202750	1203001	ID=SMEL_001g116200.1	Note=Protein of unknown function
SMEL3Ch01	1216408	1251593	ID=SMEL_001g116210.1	Note=Similar to AAE: Acetylajmalan esterase (Rauvolfia serpentina OX%3D4060)
SMEL3Ch01	1267295	1273295	ID=SMEL_001g116220.1	Note=Similar to INVB: Probable alkaline/neutral invertase B (Arabidopsis thaliana OX%3D3702)
SMEL3Ch01	1274763	1280702	ID=SMEL_001g116230.1	Note=Similar to ERD2B: ER lumen protein-retaining receptor B (Arabidopsis thaliana OX%3D3702)
SMEL3Ch01	1288293	1289334	ID=SMEL_001g116240.1	Note=Similar to SN2: Snakin-2 (Solanum tuberosum OX%3D4113)
SMEL3Ch01	1289704	1291561	ID=SMEL_001g116250.1	Note=Similar to PKSB: Type III polyketide synthase B (Arabidopsis thaliana OX%3D3702)
SMEL3Ch01	1292211	1299960	ID=SMEL_001g116260.1	Note=Similar to MTN2: 5'-methylthioadenosine/S-adenosylhomocysteine nucleosidase 2 (Arabidopsis thaliana OX%3D3702)
SMEL3Ch01	1303615	1306955	ID=SMEL_001g116270.1	Note=Similar to BC1L6: COBRA-like protein 1 (Oryza sativa subsp. japonica OX%3D39947)
SMEL3Ch01	1307964	1311447	ID=SMEL_001g116280.1	Note=Protein of unknown function
SMEL3Ch01	1318623	1325309	ID=SMEL_001g116290.1	Note=Similar to WDR12: Ribosome biogenesis protein WDR12 homolog (Arabidopsis thaliana OX%3D3702)
SMEL3Ch01	1327218	1344794	ID=SMEL_001g116300.1	Note=Similar to MRL1: Pentatricopeptide repeat-containing protein MRL1%2C chloroplastic (Arabidopsis thaliana OX%3D3702)
SMEL3Ch01	1345209	1346180	ID=SMEL_001g116310.1	Note=Similar to Aquaporin PIP-type (Atriplex canescens OX%3D35922)
SMEL3Ch01	1346339	1346455	ID=SMEL_001g116320.1	Note=Protein of unknown function
SMEL3Ch01	1347444	1347704	ID=SMEL_001g116330.1	Note=Similar to SAUR20: Auxin-responsive protein SAUR20 (Arabidopsis thaliana OX%3D3702)
SMEL3Ch01	1350258	1354697	ID=SMEL_001g116340.1	Note=Similar to At3g26560: Probable pre-mRNA-splicing factor ATP-dependent RNA helicase DEAH5 (Arabidopsis thaliana OX%3D3702)
SMEL3Ch01	1356267	1356524	ID=SMEL_001g116350.1	Note=Similar to Auxin-induced protein 15A (Glycine max OX%3D3847)
SMEL3Ch01	1358722	1360692	ID=SMEL_001g116360.1	Note=Protein of unknown function
SMEL3Ch01	1363288	1372029	ID=SMEL_001g116370.1	Note=Similar to At5g47430: E3 ubiquitin ligase PQT3-like (Arabidopsis thaliana OX%3D3702)
SMEL3Ch01	1373165	1373425	ID=SMEL_001g116380.1	Note=Similar to Auxin-induced protein 15A (Glycine max OX%3D3847)
SMEL3Ch01	1375190	1375441	ID=SMEL_001g116390.1	Note=Similar to SAUR21: Auxin-responsive protein SAUR21 (Arabidopsis thaliana OX%3D3702)
SMEL3Ch01	1377096	1377356	ID=SMEL_001g116400.1	Note=Similar to Auxin-induced protein 15A (Glycine max OX%3D3847)
SMEL3Ch01	1379206	1379463	ID=SMEL_001g116410.1	Note=Similar to SAUR21: Auxin-responsive protein SAUR21 (Arabidopsis thaliana OX%3D3702)
SMEL3Ch01	1387598	1387855	ID=SMEL_001g116420.1	Note=Similar to SAUR21: Auxin-responsive protein SAUR21 (Arabidopsis thaliana OX%3D3702)
SMEL3Ch01	1391694	1395022	ID=SMEL_001g116430.1	Note=Similar to Auxin-induced protein X10A (Glycine max OX%3D3847)
SMEL3Ch01	1400686	1400982	ID=SMEL_001g116440.1	Note=Similar to SAUR21: Auxin-responsive protein SAUR21 (Arabidopsis thaliana OX%3D3702)
SMEL3Ch01	1407605	1407907	ID=SMEL_001g116450.1	Note=Similar to SAUR21: Auxin-responsive protein SAUR21 (Arabidopsis thaliana OX%3D3702)
SMEL3Ch01	1410763	1413277	ID=SMEL_001g116460.1	Note=Similar to SAUR20: Auxin-responsive protein SAUR20 (Arabidopsis thaliana OX%3D3702)
SMEL3Ch01	1415532	1415822	ID=SMEL_001g116470.1	Note=Similar to SAUR21: Auxin-responsive protein SAUR21 (Arabidopsis thaliana OX%3D3702)
SMEL3Ch01	1419497	1419787	ID=SMEL_001g116480.1	Note=Similar to SAUR21: Auxin-responsive protein SAUR21 (Arabidopsis thaliana OX%3D3702)
SMEL3Ch01	1427594	1438034	ID=SMEL_001g116490.1	Note=Similar to SNRNP65: U11/U12 small nuclear ribonucleoprotein 65 kDa protein (Arabidopsis thaliana OX%3D3702)
SMEL3Ch01	1438958	1439218	ID=SMEL_001g116500.1	Note=Similar to Auxin-induced protein 15A (Glycine max OX%3D3847)
SMEL3Ch01	1440670	1440921	ID=SMEL_001g116510.1	Note=Similar to SAUR20: Auxin-responsive protein SAUR20 (Arabidopsis thaliana OX%3D3702)
SMEL3Ch01	1442445	1442802	ID=SMEL_001g116520.1	Note=Similar to SAUR20: Auxin-responsive protein SAUR20 (Arabidopsis thaliana OX%3D3702)
SMEL3Ch01	1444124	1444494	ID=SMEL_001g116530.1	Note=Similar to SAUR20: Auxin-responsive protein SAUR20 (Arabidopsis thaliana OX%3D3702)
SMEL3Ch01	1446371	1446631	ID=SMEL_001g116540.1	Note=Similar to SAUR20: Auxin-responsive protein SAUR20 (Arabidopsis thaliana OX%3D3702)
SMEL3Ch01	1447030	1447347	ID=SMEL_001g116550.1	Note=Similar to SAUR50: Auxin-responsive protein SAUR50 (Arabidopsis thaliana OX%3D3702)
SMEL3Ch01	1451414	1451728	ID=SMEL_001g116560.1	Note=Similar to SAUR50: Auxin-responsive protein SAUR50 (Arabidopsis thaliana OX%3D3702)
SMEL3Ch01	1459400	1459705	ID=SMEL_001g116570.1	Note=Similar to SAUR50: Auxin-responsive protein SAUR50 (Arabidopsis thaliana OX%3D3702)
SMEL3Ch01	1467594	1467899	ID=SMEL_001g116580.1	Note=Similar to SAUR50: Auxin-responsive protein SAUR50 (Arabidopsis thaliana OX%3D3702)
SMEL3Ch01	1472441	1472758	ID=SMEL_001g116590.1	Note=Similar to SAUR50: Auxin-responsive protein SAUR50 (Arabidopsis thaliana OX%3D3702)
SMEL3Ch01	1483055	1483372	ID=SMEL_001g116600.1	Note=Similar to SAUR50: Auxin-responsive protein SAUR50 (Arabidopsis thaliana OX%3D3702)
SMEL3Ch01	1484127	1484444	ID=SMEL_001g116610.1	Note=Similar to SAUR50: Auxin-responsive protein SAUR50 (Arabidopsis thaliana OX%3D3702)
SMEL3Ch01	1502451	1502909	ID=SMEL_001g116620.1	Note=Similar to SAUR40: Auxin-responsive protein SAUR40 (Arabidopsis thaliana OX%3D3702)
SMEL3Ch01	1505316	1509727	ID=SMEL_001g116630.1	Note=Similar to At4g34730: Probable ribosome-binding factor A%2C chloroplastic (Arabidopsis thaliana OX%3D3702)
SMEL3Ch01	1510156	1512491	ID=SMEL_001g116640.1	Note=Protein of unknown function
SMEL3Ch01	1513882	1517525	ID=SMEL_001g116650.1	Note=Similar to PIN1: Peptidyl-prolyl cis-trans isomerase Pin1 (Malus domestica OX%3D3750)
SMEL3Ch01	1523880	1525616	ID=SMEL_001g116660.1	Note=Similar to ASE2: Amidophosphoribosyltransferase 2%2C chloroplastic (Arabidopsis thaliana OX%3D3702)
SMEL3Ch01	1527533	1529006	ID=SMEL_001g116670.1	Note=Similar to EPSIN3: Clathrin interactor EPSIN 3 (Arabidopsis thaliana OX%3D3702)
SMEL3Ch01	1530229	1534611	ID=SMEL_001g116680.1	Note=Similar to At4g38890: tRNA-dihydrouridine(47) synthase [NAD(P)(+)]-like (Arabidopsis thaliana OX%3D3702)
SMEL3Ch01	1537212	1541997	ID=SMEL_001g116690.1	Note=Similar to RF2a: Transcription factor RF2a (Oryza sativa subsp. japonica OX%3D39947)
SMEL3Ch01	1548124	1550930	ID=SMEL_001g116700.1	Note=Similar to BPC4: Protein BASIC PENTACYSTEINE4 (Arabidopsis thaliana OX%3D3702)
SMEL3Ch01	1556873	1566320	ID=SMEL_001g116710.1	Note=Similar to PPRD2: Polyprenol reductase 2 (Arabidopsis thaliana OX%3D3702)
SMEL3Ch01	1566600	1569970	ID=SMEL_001g116720.1	Note=Similar to S6PDH: NADP-dependent D-sorbitol-6-phosphate dehydrogenase (Malus domestica OX%3D3750)
SMEL3Ch01	1571783	1573960	ID=SMEL_001g116730.1	Note=Similar to Arginine decarboxylase (Pisum sativum OX%3D3888)
SMEL3Ch01	1594217	1599856	ID=SMEL_001g116740.1	Note=Similar to VHA-c5: V-type proton ATPase subunit c5 (Arabidopsis thaliana OX%3D3702)
SMEL3Ch01	1602958	1618925	ID=SMEL_001g116750.1	Note=Protein of unknown function
SMEL3Ch01	1619718	1620005	ID=SMEL_001g116760.1	Note=Similar to Os09g0528100: 30S ribosomal protein S31%2C mitochondrial (Oryza sativa subsp. japonica OX%3D39947)
SMEL3Ch01	1622308	1626258	ID=SMEL_001g116770.1	Note=Similar to CIB22: NADH dehydrogenase [ubiquinone] 1 beta subcomplex subunit 9 (Arabidopsis thaliana OX%3D3702)
SMEL3Ch01	1627105	1633811	ID=SMEL_001g116780.1	Note=Similar to KIN7E: Kinesin-like protein KIN-7E (Arabidopsis thaliana OX%3D3702)
SMEL3Ch01	1645414	1651302	ID=SMEL_001g116790.1	Note=Similar to BBX19: B-box zinc finger protein 19 (Arabidopsis thaliana OX%3D3702)
SMEL3Ch01	1652325	1655182	ID=SMEL_001g116800.1	Note=Similar to FBA2: Fructose-bisphosphate aldolase 2%2C chloroplastic (Arabidopsis thaliana OX%3D3702)
SMEL3Ch01	1655886	1658442	ID=SMEL_001g116810.1	Note=Protein of unknown function
SMEL3Ch01	1660660	1666352	ID=SMEL_001g116820.1	Note=Similar to At4g39010: Endoglucanase 24 (Arabidopsis thaliana OX%3D3702)
SMEL3Ch01	1677055	1680492	ID=SMEL_001g116830.1	Note=Similar to CTF7: Protein CHROMOSOME TRANSMISSION FIDELITY 7 (Arabidopsis thaliana OX%3D3702)
SMEL3Ch01	1682261	1685996	ID=SMEL_001g116840.1	Note=Protein of unknown function
SMEL3Ch01	1688754	1690136	ID=SMEL_001g116850.1	Note=Similar to GATA5: GATA transcription factor 5 (Arabidopsis thaliana OX%3D3702)
SMEL3Ch01	1710606	1716592	ID=SMEL_001g116860.1	Note=Similar to SH3P2: SH3 domain-containing protein 2 (Arabidopsis thaliana OX%3D3702)
SMEL3Ch01	1717273	1726106	ID=SMEL_001g116870.1	Note=Similar to SS: Squalene synthase (Solanum lycopersicum OX%3D4081)
SMEL3Ch01	1725969	1726046	ID=SMEL_001g116880.1	Note=Protein of unknown function
SMEL3Ch01	1742444	1744856	ID=SMEL_001g116890.1	Note=Similar to DTX46: Protein DETOXIFICATION 46%2C chloroplastic (Arabidopsis thaliana OX%3D3702)
SMEL3Ch01	1747597	1749570	ID=SMEL_001g116900.1	Note=Similar to PGM1: Phosphoglucomutase%2C cytoplasmic (Solanum tuberosum OX%3D4113)
SMEL3Ch01	1752129	1757854	ID=SMEL_001g116910.1	Note=Similar to PGM1: Phosphoglucomutase%2C cytoplasmic (Solanum tuberosum OX%3D4113)
SMEL3Ch01	1758827	1769641	ID=SMEL_001g116920.1	Note=Similar to DTX46: Protein DETOXIFICATION 46%2C chloroplastic (Arabidopsis thaliana OX%3D3702)
SMEL3Ch01	1769974	1772749	ID=SMEL_001g116930.1	Note=Protein of unknown function
SMEL3Ch01	1779437	1786844	ID=SMEL_001g116940.1	Note=Similar to PLA2: Protein terminal ear1 homolog (Oryza sativa subsp. japonica OX%3D39947)
SMEL3Ch01	1790160	1791446	ID=SMEL_001g116950.1	Note=Similar to PLA2: Protein terminal ear1 homolog (Oryza sativa subsp. japonica OX%3D39947)
SMEL3Ch01	1795903	1807799	ID=SMEL_001g116960.1	Note=Similar to KIN7D: Kinesin-like protein KIN-7D%2C mitochondrial (Arabidopsis thaliana OX%3D3702)
SMEL3Ch01	1810045	1811763	ID=SMEL_001g116970.1	Note=Similar to BBX20: B-box zinc finger protein 20 (Arabidopsis thaliana OX%3D3702)
SMEL3Ch01	1822331	1830589	ID=SMEL_001g116980.1	Note=Protein of unknown function
SMEL3Ch01	1841885	1843464	ID=SMEL_001g116990.1	Note=Similar to SRS1: Protein SHI RELATED SEQUENCE 1 (Arabidopsis thaliana OX%3D3702)
SMEL3Ch01	1849378	1849551	ID=SMEL_001g117000.1	Note=Protein of unknown function
SMEL3Ch01	1852267	1859148	ID=SMEL_001g117010.1	Note=Similar to MCM4: DNA replication licensing factor MCM4 (Arabidopsis thaliana OX%3D3702)
SMEL3Ch01	1862069	1873314	ID=SMEL_001g117020.1	Note=Similar to VHA-a2: V-type proton ATPase subunit a2 (Arabidopsis thaliana OX%3D3702)
SMEL3Ch01	1873854	1876475	ID=SMEL_001g117030.1	Note=Similar to RD19A: Cysteine protease RD19A (Arabidopsis thaliana OX%3D3702)
SMEL3Ch01	1877752	1881818	ID=SMEL_001g117040.1	Note=Protein of unknown function
SMEL3Ch01	1881498	1884510	ID=SMEL_001g117050.1	Note=Similar to ARI3: Probable E3 ubiquitin-protein ligase ARI3 (Arabidopsis thaliana OX%3D3702)
SMEL3Ch01	1888002	1888643	ID=SMEL_001g117060.1	Note=Similar to ARI9: Probable E3 ubiquitin-protein ligase ARI9 (Arabidopsis thaliana OX%3D3702)
SMEL3Ch01	1893246	1897857	ID=SMEL_001g117070.1	Note=Similar to PAP2: Purple acid phosphatase 2 (Ipomoea batatas OX%3D4120)
SMEL3Ch01	1899269	1910981	ID=SMEL_001g117080.1	Note=Similar to WDR5A: COMPASS-like H3K4 histone methylase component WDR5A (Arabidopsis thaliana OX%3D3702)
SMEL3Ch01	1911136	1918858	ID=SMEL_001g117090.1	Note=Similar to EBS: Chromatin remodeling protein EBS (Arabidopsis thaliana OX%3D3702)
SMEL3Ch01	1919717	1922371	ID=SMEL_001g117100.1	Note=Similar to PCMP-E69: Pentatricopeptide repeat-containing protein At1g74600%2C chloroplastic (Arabidopsis thaliana OX%3D3702)
SMEL3Ch01	1922904	1929002	ID=SMEL_001g117110.1	Note=Similar to BGAL3: Beta-galactosidase 3 (Arabidopsis thaliana OX%3D3702)
SMEL3Ch01	1940969	1959197	ID=SMEL_001g117120.1	Note=Similar to SC35: Serine/arginine-rich splicing factor SC35 (Arabidopsis thaliana OX%3D3702)
SMEL3Ch01	1966528	1971523	ID=SMEL_001g117130.1	Note=Similar to BLH6: BEL1-like homeodomain protein 6 (Arabidopsis thaliana OX%3D3702)
SMEL3Ch01	1971697	1982282	ID=SMEL_001g117140.1	Note=Similar to DRD1: Protein CHROMATIN REMODELING 35 (Arabidopsis thaliana OX%3D3702)
SMEL3Ch01	1990060	2002058	ID=SMEL_001g117150.1	Note=Similar to SAE2: SUMO-activating enzyme subunit 2 (Arabidopsis thaliana OX%3D3702)
SMEL3Ch01	2003063	2005699	ID=SMEL_001g117160.1	Note=Similar to At4g39110: Probable receptor-like protein kinase At4g39110 (Arabidopsis thaliana OX%3D3702)
SMEL3Ch01	2006891	2012187	ID=SMEL_001g117170.1	Note=Similar to RPT4B: 26S proteasome regulatory subunit S10B homolog B (Arabidopsis thaliana OX%3D3702)
SMEL3Ch01	2012316	2018350	ID=SMEL_001g117180.1	Note=Similar to HISN7: Bifunctional phosphatase IMPL2%2C chloroplastic (Arabidopsis thaliana OX%3D3702)
SMEL3Ch01	2019484	2022383	ID=SMEL_001g117190.1	Note=Similar to Late embryogenesis abundant protein (Raphanus sativus OX%3D3726)
SMEL3Ch01	2023948	2028565	ID=SMEL_001g117200.1	Note=Protein of unknown function
SMEL3Ch01	2041982	2042182	ID=SMEL_001g117210.1	Note=Protein of unknown function
SMEL3Ch01	2051736	2058246	ID=SMEL_001g117220.1	Note=Similar to ATJ10: Chaperone protein dnaJ 10 (Arabidopsis thaliana OX%3D3702)
SMEL3Ch01	2072258	2072755	ID=SMEL_001g117230.1	Note=Similar to BZIP44: bZIP transcription factor 44 (Arabidopsis thaliana OX%3D3702)
SMEL3Ch01	2098721	2106535	ID=SMEL_001g117240.1	Note=Similar to SFH8: Phosphatidylinositol/phosphatidylcholine transfer protein SFH8 (Arabidopsis thaliana OX%3D3702)
SMEL3Ch01	2106904	2110403	ID=SMEL_001g117250.1	Note=Similar to SFH12: Phosphatidylinositol/phosphatidylcholine transfer protein SFH12 (Arabidopsis thaliana OX%3D3702)
SMEL3Ch01	2120139	2125485	ID=SMEL_001g117260.1	Note=Similar to LYSA2: Diaminopimelate decarboxylase 2%2C chloroplastic (Arabidopsis thaliana OX%3D3702)
SMEL3Ch01	2132342	2138034	ID=SMEL_001g117270.1	Note=Similar to Bifunctional dihydrofolate reductase-thymidylate synthase (Glycine max OX%3D3847)
SMEL3Ch01	2143031	2143741	ID=SMEL_001g117280.1	Note=Protein of unknown function
SMEL3Ch01	2149583	2150260	ID=SMEL_001g117290.1	Note=Protein of unknown function
SMEL3Ch01	2156825	2157508	ID=SMEL_001g117300.1	Note=Protein of unknown function
SMEL3Ch01	2170365	2175195	ID=SMEL_001g117310.1	Note=Similar to AGPS1: Glucose-1-phosphate adenylyltransferase large subunit 1 (Fragment) (Solanum tuberosum OX%3D4113)
SMEL3Ch01	2176071	2179884	ID=SMEL_001g117320.1	Note=Similar to At2g16365: F-box protein At2g16365 (Arabidopsis thaliana OX%3D3702)
SMEL3Ch01	2184684	2188140	ID=SMEL_001g117330.1	Note=Similar to RER1B: Protein RER1B (Arabidopsis thaliana OX%3D3702)
SMEL3Ch01	2189882	2191543	ID=SMEL_001g117340.1	Note=Similar to NFD4: Protein NUCLEAR FUSION DEFECTIVE 4 (Arabidopsis thaliana OX%3D3702)
SMEL3Ch01	2192987	2194707	ID=SMEL_001g117350.1	Note=Similar to SYP112: Syntaxin-112 (Arabidopsis thaliana OX%3D3702)
SMEL3Ch01	2195388	2196952	ID=SMEL_001g117360.1	Note=Protein of unknown function
SMEL3Ch01	2197329	2200107	ID=SMEL_001g117370.1	Note=Similar to PME11: Putative pectinesterase 11 (Arabidopsis thaliana OX%3D3702)
SMEL3Ch01	2208415	2210747	ID=SMEL_001g117380.1	Note=Protein of unknown function
SMEL3Ch01	2212280	2214742	ID=SMEL_001g117390.1	Note=Similar to At3g01520: Universal stress protein A-like protein (Arabidopsis thaliana OX%3D3702)
SMEL3Ch01	2218693	2221699	ID=SMEL_001g117400.1	Note=Similar to BHLH63: Transcription factor bHLH63 (Arabidopsis thaliana OX%3D3702)
SMEL3Ch01	2252470	2253996	ID=SMEL_001g117410.1	Note=Similar to RL6: Protein RADIALIS-like 6 (Arabidopsis thaliana OX%3D3702)
SMEL3Ch01	2259358	2260909	ID=SMEL_001g117420.1	Note=Protein of unknown function
SMEL3Ch01	2263436	2264312	ID=SMEL_001g117430.1	Note=Protein of unknown function
SMEL3Ch01	2273094	2274183	ID=SMEL_001g117440.1	Note=Similar to Glycine-rich RNA-binding protein (Daucus carota OX%3D4039)
SMEL3Ch01	2294695	2303738	ID=SMEL_001g117450.1	Note=Similar to At2g16250: Probable LRR receptor-like serine/threonine-protein kinase At2g16250 (Arabidopsis thaliana OX%3D3702)
SMEL3Ch01	2307214	2312528	ID=SMEL_001g117460.1	Note=Similar to At3g50860: AP-3 complex subunit sigma (Arabidopsis thaliana OX%3D3702)
SMEL3Ch01	2313946	2317667	ID=SMEL_001g117470.1	Note=Similar to MTERF2: Transcription termination factor MTERF2%2C chloroplastic (Arabidopsis thaliana OX%3D3702)
SMEL3Ch01	2318456	2324364	ID=SMEL_001g117480.1	Note=Similar to NADH dehydrogenase [ubiquinone] iron-sulfur protein 8%2C mitochondrial (Solanum tuberosum OX%3D4113)
SMEL3Ch01	2329176	2332591	ID=SMEL_001g117490.1	Note=Similar to At1g01500: Uncharacterized protein At1g01500 (Arabidopsis thaliana OX%3D3702)
SMEL3Ch01	2333240	2342185	ID=SMEL_001g117500.1	Note=Similar to At3g05675: BTB/POZ domain-containing protein At3g05675 (Arabidopsis thaliana OX%3D3702)
SMEL3Ch01	2354612	2360365	ID=SMEL_001g117510.1	Note=Similar to At4g34500: Probable receptor-like serine/threonine-protein kinase At4g34500 (Arabidopsis thaliana OX%3D3702)
SMEL3Ch01	2361890	2369036	ID=SMEL_001g117520.1	Note=Similar to CAP1: Cyclase-associated protein 1 (Arabidopsis thaliana OX%3D3702)
SMEL3Ch01	2372184	2377092	ID=SMEL_001g117530.1	Note=Similar to OLE9: Glucan endo-1%2C3-beta-D-glucosidase (Olea europaea OX%3D4146)
SMEL3Ch01	2378658	2386774	ID=SMEL_001g117540.1	Note=Similar to GB1: Guanine nucleotide-binding protein subunit beta (Solanum tuberosum OX%3D4113)
SMEL3Ch01	2387425	2388300	ID=SMEL_001g117550.1	Note=Similar to MTERF1: Transcription termination factor MTEF1%2C chloroplastic (Arabidopsis thaliana OX%3D3702)
SMEL3Ch01	2388464	2401349	ID=SMEL_001g117560.1	Note=Similar to At4g34450: Coatomer subunit gamma (Arabidopsis thaliana OX%3D3702)
SMEL3Ch01	2404180	2409020	ID=SMEL_001g117570.1	Note=Similar to PERK4: Proline-rich receptor-like protein kinase PERK4 (Arabidopsis thaliana OX%3D3702)
SMEL3Ch01	2411286	2415788	ID=SMEL_001g117580.1	Note=Similar to RABG3F: Ras-related protein RABG3f (Arabidopsis thaliana OX%3D3702)
SMEL3Ch01	2416517	2428136	ID=SMEL_001g117590.1	Note=Similar to SWI3D: SWI/SNF complex subunit SWI3D (Arabidopsis thaliana OX%3D3702)
SMEL3Ch01	2437900	2445165	ID=SMEL_001g117600.1	Note=Similar to USPL1: BURP domain protein USPL1 (Arabidopsis thaliana OX%3D3702)
SMEL3Ch01	2447109	2448384	ID=SMEL_001g117610.1	Note=Protein of unknown function
SMEL3Ch01	2456261	2457630	ID=SMEL_001g117620.1	Note=Similar to USPL1: BURP domain protein USPL1 (Arabidopsis thaliana OX%3D3702)
SMEL3Ch01	2460763	2461788	ID=SMEL_001g117630.1	Note=Similar to PLT5: Polyol transporter 5 (Arabidopsis thaliana OX%3D3702)
SMEL3Ch01	2473874	2474826	ID=SMEL_001g117640.1	Note=Similar to PLT5: Polyol transporter 5 (Arabidopsis thaliana OX%3D3702)
SMEL3Ch01	2482341	2486787	ID=SMEL_001g117650.1	Note=Similar to PLT5: Polyol transporter 5 (Arabidopsis thaliana OX%3D3702)
SMEL3Ch01	2525246	2532569	ID=SMEL_001g117660.1	Note=Protein of unknown function
SMEL3Ch01	2532191	2532367	ID=SMEL_001g117670.1	Note=Protein of unknown function
SMEL3Ch01	2539178	2543956	ID=SMEL_001g117680.1	Note=Similar to At4g17486: DeSI-like protein At4g17486 (Arabidopsis thaliana OX%3D3702)
SMEL3Ch01	2544785	2547617	ID=SMEL_001g117690.1	Note=Similar to At4g36750: Probable NAD(P)H dehydrogenase (quinone) FQR1-like 2 (Arabidopsis thaliana OX%3D3702)
SMEL3Ch01	2548645	2557612	ID=SMEL_001g117700.1	Note=Similar to OST48: Dolichyl-diphosphooligosaccharide--protein glycosyltransferase 48 kDa subunit (Oryza sativa subsp. japonica OX%3D39947)
SMEL3Ch01	2563287	2564543	ID=SMEL_001g117710.1	Note=Similar to At1g13570: F-box/FBD/LRR-repeat protein At1g13570 (Arabidopsis thaliana OX%3D3702)
SMEL3Ch01	2565110	2565424	ID=SMEL_001g117720.1	Note=Similar to DIR1: Putative lipid-transfer protein DIR1 (Arabidopsis thaliana OX%3D3702)
SMEL3Ch01	2584529	2585641	ID=SMEL_001g117730.1	Note=Similar to At4g34320: UPF0496 protein At4g34320 (Arabidopsis thaliana OX%3D3702)
SMEL3Ch01	2586515	2589542	ID=SMEL_001g117740.1	Note=Similar to LPAT5: Probable 1-acyl-sn-glycerol-3-phosphate acyltransferase 5 (Arabidopsis thaliana OX%3D3702)
SMEL3Ch01	2589507	2591242	ID=SMEL_001g117750.1	Note=Similar to atpA: ATP synthase subunit alpha%2C chloroplastic (Solanum lycopersicum OX%3D4081)
SMEL3Ch01	2598914	2619990	ID=SMEL_001g117760.1	Note=Similar to WDR5A: COMPASS-like H3K4 histone methylase component WDR5A (Arabidopsis thaliana OX%3D3702)
SMEL3Ch01	2625592	2626937	ID=SMEL_001g117770.1	Note=Similar to RMA1: E3 ubiquitin-protein ligase RMA1 (Arabidopsis thaliana OX%3D3702)
SMEL3Ch01	2629262	2640294	ID=SMEL_001g117780.1	Note=Similar to CCS1: Cytochrome c biogenesis protein CCS1%2C chloroplastic (Arabidopsis thaliana OX%3D3702)
SMEL3Ch01	2644340	2647165	ID=SMEL_001g117790.1	Note=Similar to DTX33: Protein DETOXIFICATION 33 (Arabidopsis thaliana OX%3D3702)
SMEL3Ch01	2652942	2655656	ID=SMEL_001g117800.1	Note=Similar to DTX33: Protein DETOXIFICATION 33 (Arabidopsis thaliana OX%3D3702)
SMEL3Ch01	2660319	2662391	ID=SMEL_001g117810.1	Note=Similar to DTX33: Protein DETOXIFICATION 33 (Arabidopsis thaliana OX%3D3702)
SMEL3Ch01	2662486	2667891	ID=SMEL_001g117820.1	Note=Similar to ISPH: 4-hydroxy-3-methylbut-2-enyl diphosphate reductase%2C chloroplastic (Arabidopsis thaliana OX%3D3702)
SMEL3Ch01	2671044	2673803	ID=SMEL_001g117830.1	Note=Protein of unknown function
SMEL3Ch01	2674943	2685934	ID=SMEL_001g117840.1	Note=Similar to ARI2: Probable E3 ubiquitin-protein ligase ARI2 (Arabidopsis thaliana OX%3D3702)
SMEL3Ch01	2690005	2692949	ID=SMEL_001g117850.1	Note=Protein of unknown function
SMEL3Ch01	2694193	2699418	ID=SMEL_001g117860.1	Note=Similar to PDV2: Plastid division protein PDV2 (Arabidopsis thaliana OX%3D3702)
SMEL3Ch01	2700857	2701333	ID=SMEL_001g117870.1	Note=Protein of unknown function
SMEL3Ch01	2707414	2707910	ID=SMEL_001g117880.1	Note=Similar to LBD24: LOB domain-containing protein 24 (Arabidopsis thaliana OX%3D3702)
SMEL3Ch01	2709265	2711843	ID=SMEL_001g117890.1	Note=Protein of unknown function
SMEL3Ch01	2719789	2719953	ID=SMEL_001g117900.1	Note=Similar to TOM6: Mitochondrial import receptor subunit TOM6 homolog (Arabidopsis thaliana OX%3D3702)
SMEL3Ch01	2721958	2723205	ID=SMEL_001g117910.1	Note=Similar to ATL65: RING-H2 finger protein ATL65 (Arabidopsis thaliana OX%3D3702)
SMEL3Ch01	2729345	2734381	ID=SMEL_001g117920.1	Note=Similar to LACS2: Long chain acyl-CoA synthetase 2 (Arabidopsis thaliana OX%3D3702)
SMEL3Ch01	2734297	2736081	ID=SMEL_001g117930.1	Note=Similar to COR413PM2: Cold-regulated 413 plasma membrane protein 2 (Arabidopsis thaliana OX%3D3702)
SMEL3Ch01	2741718	2747055	ID=SMEL_001g117940.1	Note=Similar to AOS3: Allene oxide synthase 3 (Solanum lycopersicum OX%3D4081)
SMEL3Ch01	2757813	2759669	ID=SMEL_001g117950.1	Note=Similar to DES: 9-divinyl ether synthase (Capsicum annuum OX%3D4072)
SMEL3Ch01	2766703	2770558	ID=SMEL_001g117960.1	Note=Protein of unknown function
SMEL3Ch01	2814822	2819673	ID=SMEL_001g117970.1	Note=Similar to XLG1: Extra-large guanine nucleotide-binding protein 1 (Arabidopsis thaliana OX%3D3702)
SMEL3Ch01	2819823	2820047	ID=SMEL_001g117980.1	Note=Protein of unknown function
SMEL3Ch01	2821938	2823383	ID=SMEL_001g117990.1	Note=Protein of unknown function
SMEL3Ch01	2827078	2857284	ID=SMEL_001g118000.1	Note=Similar to TOR: Serine/threonine-protein kinase TOR (Oryza sativa subsp. japonica OX%3D39947)
SMEL3Ch01	2866265	2866510	ID=SMEL_001g118010.1	Note=Protein of unknown function
SMEL3Ch01	2866729	2869558	ID=SMEL_001g118020.1	Note=Similar to At2g15630: Pentatricopeptide repeat-containing protein At2g15630%2C mitochondrial (Arabidopsis thaliana OX%3D3702)
SMEL3Ch01	2870921	2872195	ID=SMEL_001g118030.1	Note=Protein of unknown function
SMEL3Ch01	2872507	2876196	ID=SMEL_001g118040.1	Note=Similar to petM: Cytochrome b6-f complex subunit 7 (Fragment) (Spinacia oleracea OX%3D3562)
SMEL3Ch01	2877561	2878900	ID=SMEL_001g118050.1	Note=Similar to Os03g0621600: Putative B3 domain-containing protein Os03g0621600 (Oryza sativa subsp. japonica OX%3D39947)
SMEL3Ch01	2881297	2896740	ID=SMEL_001g118060.1	Note=Protein of unknown function
SMEL3Ch01	2900974	2902788	ID=SMEL_001g118070.1	Note=Similar to MEE14: CCG-binding protein 1 (Arabidopsis thaliana OX%3D3702)
SMEL3Ch01	2903463	2904684	ID=SMEL_001g118080.1	Note=Similar to PEX4: Pollen-specific leucine-rich repeat extensin-like protein 4 (Arabidopsis thaliana OX%3D3702)
SMEL3Ch01	2907012	2911951	ID=SMEL_001g118090.1	Note=Protein of unknown function
SMEL3Ch01	2914774	2917227	ID=SMEL_001g118100.1	Note=Similar to DLO2: Protein DMR6-LIKE OXYGENASE 2 (Arabidopsis thaliana OX%3D3702)
SMEL3Ch01	2918096	2920214	ID=SMEL_001g118110.1	Note=Similar to DLO2: Protein DMR6-LIKE OXYGENASE 2 (Arabidopsis thaliana OX%3D3702)
SMEL3Ch01	2923612	2925023	ID=SMEL_001g118120.1	Note=Similar to At5g05600: Probable 2-oxoglutarate-dependent dioxygenase At5g05600 (Arabidopsis thaliana OX%3D3702)
SMEL3Ch01	2926295	2927683	ID=SMEL_001g118130.1	Note=Similar to TMK1: Receptor protein kinase TMK1 (Arabidopsis thaliana OX%3D3702)
SMEL3Ch01	2933885	2938879	ID=SMEL_001g118140.1	Note=Similar to TMK1: Receptor protein kinase TMK1 (Arabidopsis thaliana OX%3D3702)
SMEL3Ch01	2947547	2948725	ID=SMEL_001g118150.1	Note=Similar to SABP2: Salicylic acid-binding protein 2 (Nicotiana tabacum OX%3D4097)
SMEL3Ch01	2952550	2953800	ID=SMEL_001g118160.1	Note=Similar to MES3: Methylesterase 3 (Arabidopsis thaliana OX%3D3702)
SMEL3Ch01	2966745	2968009	ID=SMEL_001g118170.1	Note=Similar to PNAE: Polyneuridine-aldehyde esterase (Rauvolfia serpentina OX%3D4060)
SMEL3Ch01	2969018	2970266	ID=SMEL_001g118180.1	Note=Similar to MES10: Methylesterase 10 (Arabidopsis thaliana OX%3D3702)
SMEL3Ch01	2971158	2973998	ID=SMEL_001g118190.1	Note=Similar to SABP2: Salicylic acid-binding protein 2 (Nicotiana tabacum OX%3D4097)
SMEL3Ch01	3004999	3005621	ID=SMEL_001g118200.1	Note=Similar to SABP2: Salicylic acid-binding protein 2 (Nicotiana tabacum OX%3D4097)
SMEL3Ch01	3007491	3010933	ID=SMEL_001g118210.1	Note=Similar to SABP2: Salicylic acid-binding protein 2 (Nicotiana tabacum OX%3D4097)
SMEL3Ch01	3031033	3032241	ID=SMEL_001g118220.1	Note=Similar to PNAE: Polyneuridine-aldehyde esterase (Rauvolfia serpentina OX%3D4060)
SMEL3Ch01	3034648	3035888	ID=SMEL_001g118230.1	Note=Similar to PNAE: Polyneuridine-aldehyde esterase (Rauvolfia serpentina OX%3D4060)
SMEL3Ch01	3045360	3060845	ID=SMEL_001g118240.1	Note=Similar to KIN12D: Kinesin-like protein KIN-12D (Arabidopsis thaliana OX%3D3702)
SMEL3Ch01	3063630	3071451	ID=SMEL_001g118250.1	Note=Similar to At2g19940: Probable N-acetyl-gamma-glutamyl-phosphate reductase%2C chloroplastic (Arabidopsis thaliana OX%3D3702)
SMEL3Ch01	3072154	3075219	ID=SMEL_001g118260.1	Note=Protein of unknown function
SMEL3Ch01	3075500	3076241	ID=SMEL_001g118270.1	Note=Similar to At5g45910: GDSL esterase/lipase At5g45910 (Arabidopsis thaliana OX%3D3702)
SMEL3Ch01	3077584	3079268	ID=SMEL_001g118280.1	Note=Similar to At1g28640: GDSL esterase/lipase At1g28640 (Arabidopsis thaliana OX%3D3702)
SMEL3Ch01	3080122	3084706	ID=SMEL_001g118290.1	Note=Similar to NIR1: Ferredoxin--nitrite reductase%2C chloroplastic (Arabidopsis thaliana OX%3D3702)
SMEL3Ch01	3087067	3092030	ID=SMEL_001g118300.1	Note=Protein of unknown function
SMEL3Ch01	3096428	3097642	ID=SMEL_001g118310.1	Note=Similar to KRP7: Cyclin-dependent kinase inhibitor 7 (Arabidopsis thaliana OX%3D3702)
SMEL3Ch01	3104195	3117233	ID=SMEL_001g118320.1	Note=Similar to PREP1: Presequence protease 1%2C chloroplastic/mitochondrial (Arabidopsis thaliana OX%3D3702)
SMEL3Ch01	3118975	3120025	ID=SMEL_001g118330.1	Note=Similar to HIDM: 2-hydroxyisoflavanone dehydratase (Glycyrrhiza echinata OX%3D46348)
SMEL3Ch01	3122423	3123361	ID=SMEL_001g118340.1	Note=Similar to CXE7: Probable carboxylesterase 7 (Arabidopsis thaliana OX%3D3702)
SMEL3Ch01	3124719	3125663	ID=SMEL_001g118350.1	Note=Similar to HIDM: 2-hydroxyisoflavanone dehydratase (Glycyrrhiza echinata OX%3D46348)
SMEL3Ch01	3126509	3133507	ID=SMEL_001g118360.1	Note=Similar to HIDM: 2-hydroxyisoflavanone dehydratase (Glycyrrhiza echinata OX%3D46348)
SMEL3Ch01	3134927	3135904	ID=SMEL_001g118370.1	Note=Similar to CXE13: Probable carboxylesterase 13 (Arabidopsis thaliana OX%3D3702)
SMEL3Ch01	3138726	3139640	ID=SMEL_001g118380.1	Note=Similar to CXE13: Probable carboxylesterase 13 (Arabidopsis thaliana OX%3D3702)
SMEL3Ch01	3143458	3146871	ID=SMEL_001g118390.1	Note=Protein of unknown function
SMEL3Ch01	3148355	3154931	ID=SMEL_001g118400.1	Note=Similar to RBP47: Polyadenylate-binding protein RBP47 (Nicotiana plumbaginifolia OX%3D4092)
SMEL3Ch01	3157825	3172066	ID=SMEL_001g118410.1	Note=Similar to CXP%3B2-3: Serine carboxypeptidase II-3 (Hordeum vulgare OX%3D4513)
SMEL3Ch01	3174451	3178976	ID=SMEL_001g118420.1	Note=Similar to CXP%3B2-3: Serine carboxypeptidase II-3 (Hordeum vulgare OX%3D4513)
SMEL3Ch01	3186587	3187619	ID=SMEL_001g118430.1	Note=Protein of unknown function
SMEL3Ch01	3194072	3198789	ID=SMEL_001g118440.1	Note=Similar to ZOP1: Zinc finger protein ZOP1 (Arabidopsis thaliana OX%3D3702)
SMEL3Ch01	3200501	3201856	ID=SMEL_001g118450.1	Note=Similar to At3g55350: Protein ALP1-like (Arabidopsis thaliana OX%3D3702)
SMEL3Ch01	3207514	3208184	ID=SMEL_001g118460.1	Note=Similar to EMB2745: Pentatricopeptide repeat-containing protein At5g39710 (Arabidopsis thaliana OX%3D3702)
SMEL3Ch01	3208687	3210990	ID=SMEL_001g118470.1	Note=Similar to EMB2745: Pentatricopeptide repeat-containing protein At5g39710 (Arabidopsis thaliana OX%3D3702)
SMEL3Ch01	3219100	3228995	ID=SMEL_001g118480.1	Note=Similar to CRK5: CDPK-related kinase 5 (Arabidopsis thaliana OX%3D3702)
SMEL3Ch01	3240108	3240664	ID=SMEL_001g118490.1	Note=Similar to Proteinase inhibitor (Linum usitatissimum OX%3D4006)
SMEL3Ch01	3241180	3251919	ID=SMEL_001g118500.1	Note=Protein of unknown function
SMEL3Ch01	3248789	3249139	ID=SMEL_001g118510.1	Note=Similar to Glu S.griseus protease inhibitor (Momordica charantia OX%3D3673)
SMEL3Ch01	3262646	3268245	ID=SMEL_001g118520.1	Note=Similar to CYP40: Peptidyl-prolyl cis-trans isomerase CYP40 (Arabidopsis thaliana OX%3D3702)
SMEL3Ch01	3274683	3275138	ID=SMEL_001g118530.1	Note=Protein of unknown function
SMEL3Ch01	3280218	3281708	ID=SMEL_001g118540.1	Note=Similar to PER10: Peroxidase 10 (Arabidopsis thaliana OX%3D3702)
SMEL3Ch01	3283750	3286831	ID=SMEL_001g118550.1	Note=Similar to LARP6C: La-related protein 6C (Arabidopsis thaliana OX%3D3702)
SMEL3Ch01	3292067	3296656	ID=SMEL_001g118560.1	Note=Similar to EFM: Myb family transcription factor EFM (Arabidopsis thaliana OX%3D3702)
SMEL3Ch01	3308638	3313669	ID=SMEL_001g118570.1	Note=Similar to NERD: Zinc finger CCCH domain-containing protein 19 (Arabidopsis thaliana OX%3D3702)
SMEL3Ch01	3323261	3330144	ID=SMEL_001g118580.1	Note=Similar to SRK2E: Serine/threonine-protein kinase SRK2E (Arabidopsis thaliana OX%3D3702)
SMEL3Ch01	3330563	3331834	ID=SMEL_001g118590.1	Note=Similar to At1g28640: GDSL esterase/lipase At1g28640 (Arabidopsis thaliana OX%3D3702)
SMEL3Ch01	3353525	3357088	ID=SMEL_001g118600.1	Note=Similar to CYP707A4: Abscisic acid 8'-hydroxylase 4 (Arabidopsis thaliana OX%3D3702)
SMEL3Ch01	3368724	3382054	ID=SMEL_001g118610.1	Note=Similar to LAG2: LAG1 longevity assurance homolog 2 (Arabidopsis thaliana OX%3D3702)
SMEL3Ch01	3390524	3391345	ID=SMEL_001g118620.1	Note=Similar to ERF109: Ethylene-responsive transcription factor ERF109 (Arabidopsis thaliana OX%3D3702)
SMEL3Ch01	3400172	3404017	ID=SMEL_001g118630.1	Note=Similar to CYPRO4: Protein CYPRO4 (Cynara cardunculus OX%3D4265)
SMEL3Ch01	3404280	3407966	ID=SMEL_001g118640.1	Note=Protein of unknown function
SMEL3Ch01	3409006	3412409	ID=SMEL_001g118650.1	Note=Similar to At2g14440: Putative leucine-rich repeat receptor-like serine/threonine-protein kinase At2g14440 (Arabidopsis thaliana OX%3D3702)
SMEL3Ch01	3413229	3416629	ID=SMEL_001g118660.1	Note=Similar to SCO2: Protein disulfide-isomerase SCO2 (Arabidopsis thaliana OX%3D3702)
SMEL3Ch01	3417013	3417570	ID=SMEL_001g118670.1	Note=Similar to CML30: Calmodulin-like protein 30 (Arabidopsis thaliana OX%3D3702)
SMEL3Ch01	3419971	3421881	ID=SMEL_001g118680.1	Note=Similar to PCMP-H66: Pentatricopeptide repeat-containing protein At2g15690%2C mitochondrial (Arabidopsis thaliana OX%3D3702)
SMEL3Ch01	3424136	3424582	ID=SMEL_001g118690.1	Note=Protein of unknown function
SMEL3Ch01	3431396	3432465	ID=SMEL_001g118700.1	Note=Protein of unknown function
SMEL3Ch01	3436807	3459615	ID=SMEL_001g118710.1	Note=Similar to ATG2: Autophagy-related protein 2 (Arabidopsis thaliana OX%3D3702)
SMEL3Ch01	3467947	3491970	ID=SMEL_001g118720.1	Note=Similar to DBR: 2-alkenal reductase (NADP(+)-dependent) (Nicotiana tabacum OX%3D4097)
SMEL3Ch01	3483269	3485026	ID=SMEL_001g118730.1	Note=Similar to At1g65750: Putative ribonuclease H protein At1g65750 (Arabidopsis thaliana OX%3D3702)
SMEL3Ch01	3491970	3495686	ID=SMEL_001g118740.1	Note=Similar to At3g19184: B3 domain-containing protein At3g19184 (Arabidopsis thaliana OX%3D3702)
SMEL3Ch01	3496778	3503787	ID=SMEL_001g118750.1	Note=Similar to At5g42700: B3 domain-containing protein At5g42700 (Arabidopsis thaliana OX%3D3702)
SMEL3Ch01	3525897	3526163	ID=SMEL_001g118760.1	Note=Protein of unknown function
SMEL3Ch01	3527573	3532228	ID=SMEL_001g118770.1	Note=Similar to At3g19184: B3 domain-containing protein At3g19184 (Arabidopsis thaliana OX%3D3702)
SMEL3Ch01	3536683	3537876	ID=SMEL_001g118780.1	Note=Similar to AGL86: Agamous-like MADS-box protein AGL86 (Arabidopsis thaliana OX%3D3702)
SMEL3Ch01	3539280	3548151	ID=SMEL_001g118790.1	Note=Similar to FUT12: Putative fucosyltransferase-like protein (Arabidopsis thaliana OX%3D3702)
SMEL3Ch01	3549732	3556501	ID=SMEL_001g118800.1	Note=Protein of unknown function
SMEL3Ch01	3567516	3568697	ID=SMEL_001g118810.1	Note=Protein of unknown function
SMEL3Ch01	3573415	3574596	ID=SMEL_001g118820.1	Note=Protein of unknown function
SMEL3Ch01	3592078	3594830	ID=SMEL_001g118830.1	Note=Similar to ABF1: ABSCISIC ACID-INSENSITIVE 5-like protein 4 (Arabidopsis thaliana OX%3D3702)
SMEL3Ch01	3594747	3599052	ID=SMEL_001g118840.1	Note=Similar to DJ1C: Protein DJ-1 homolog C (Arabidopsis thaliana OX%3D3702)
SMEL3Ch01	3618760	3624050	ID=SMEL_001g118850.1	Note=Similar to MCCB: Methylcrotonoyl-CoA carboxylase beta chain%2C mitochondrial (Arabidopsis thaliana OX%3D3702)
SMEL3Ch01	3625882	3629927	ID=SMEL_001g118860.1	Note=Similar to GAT1: Thioredoxin M3%2C chloroplastic (Arabidopsis thaliana OX%3D3702)
SMEL3Ch01	3632265	3635573	ID=SMEL_001g118870.1	Note=Protein of unknown function
SMEL3Ch01	3644319	3650840	ID=SMEL_001g118880.1	Note=Similar to At1g49730: Probable receptor-like protein kinase At1g49730 (Arabidopsis thaliana OX%3D3702)
SMEL3Ch01	3655142	3659770	ID=SMEL_001g118890.1	Note=Similar to At5g67130: PI-PLC X domain-containing protein At5g67130 (Arabidopsis thaliana OX%3D3702)
SMEL3Ch01	3670779	3672026	ID=SMEL_001g118900.1	Note=Similar to PUB25: U-box domain-containing protein 25 (Arabidopsis thaliana OX%3D3702)
SMEL3Ch01	3676278	3679696	ID=SMEL_001g118910.1	Note=Similar to BHLH95: Transcription factor bHLH95 (Arabidopsis thaliana OX%3D3702)
SMEL3Ch01	3692767	3701133	ID=SMEL_001g118920.1	Note=Similar to MBR1: E3 ubiquitin-protein ligase MBR1 (Arabidopsis thaliana OX%3D3702)
SMEL3Ch01	3714757	3715995	ID=SMEL_001g118930.1	Note=Similar to At3g55350: Protein ALP1-like (Arabidopsis thaliana OX%3D3702)
SMEL3Ch01	3721453	3723635	ID=SMEL_001g118940.1	Note=Similar to CCOAOMT6: Caffeoyl-CoA O-methyltransferase 6 (Nicotiana tabacum OX%3D4097)
SMEL3Ch01	3732195	3738507	ID=SMEL_001g118950.1	Note=Similar to WSD1: O-acyltransferase WSD1 (Arabidopsis thaliana OX%3D3702)
SMEL3Ch01	3744682	3746275	ID=SMEL_001g118960.1	Note=Similar to WSD1: O-acyltransferase WSD1 (Arabidopsis thaliana OX%3D3702)
SMEL3Ch01	3746871	3751103	ID=SMEL_001g118970.1	Note=Similar to WSD1: O-acyltransferase WSD1 (Arabidopsis thaliana OX%3D3702)
SMEL3Ch01	3751269	3758264	ID=SMEL_001g118980.1	Note=Similar to FPP7: Filament-like plant protein 7 (Arabidopsis thaliana OX%3D3702)
SMEL3Ch01	3762985	3769941	ID=SMEL_001g118990.1	Note=Similar to SUD1: Probable E3 ubiquitin ligase SUD1 (Arabidopsis thaliana OX%3D3702)
SMEL3Ch01	3770428	3779820	ID=SMEL_001g119000.1	Note=Similar to PAB8: Polyadenylate-binding protein 8 (Arabidopsis thaliana OX%3D3702)
SMEL3Ch01	3785935	3798138	ID=SMEL_001g119010.1	Note=Similar to CBSX1: CBS domain-containing protein CBSX1%2C chloroplastic (Arabidopsis thaliana OX%3D3702)
SMEL3Ch01	3801933	3803348	ID=SMEL_001g119020.1	Note=Similar to TOGT1: Scopoletin glucosyltransferase (Nicotiana tabacum OX%3D4097)
SMEL3Ch01	3807716	3810617	ID=SMEL_001g119030.1	Note=Similar to TOGT1: Scopoletin glucosyltransferase (Nicotiana tabacum OX%3D4097)
SMEL3Ch01	3811188	3812615	ID=SMEL_001g119040.1	Note=Similar to TOGT1: Scopoletin glucosyltransferase (Nicotiana tabacum OX%3D4097)
SMEL3Ch01	3819364	3820770	ID=SMEL_001g119050.1	Note=Similar to TOGT1: Scopoletin glucosyltransferase (Nicotiana tabacum OX%3D4097)
SMEL3Ch01	3831561	3832505	ID=SMEL_001g119060.1	Note=Similar to IRX15-L: Protein IRX15-LIKE (Arabidopsis thaliana OX%3D3702)
SMEL3Ch01	3834733	3837262	ID=SMEL_001g119070.1	Note=Similar to At4g06744: Uncharacterized protein At4g06744 (Arabidopsis thaliana OX%3D3702)
SMEL3Ch01	3840271	3841719	ID=SMEL_001g119080.1	Note=Similar to TOGT1: Scopoletin glucosyltransferase (Nicotiana tabacum OX%3D4097)
SMEL3Ch01	3843011	3844462	ID=SMEL_001g119090.1	Note=Similar to TOGT1: Scopoletin glucosyltransferase (Nicotiana tabacum OX%3D4097)
SMEL3Ch01	3849533	3852879	ID=SMEL_001g119100.1	Note=Similar to RD21B: Probable cysteine protease RD21B (Arabidopsis thaliana OX%3D3702)
SMEL3Ch01	3854766	3866005	ID=SMEL_001g119110.1	Note=Similar to PTEN2A: Phosphatidylinositol 3%2C4%2C5-trisphosphate 3-phosphatase and protein-tyrosine-phosphatase PTEN2A (Arabidopsis thaliana OX%3D3702)
SMEL3Ch01	3866824	3870064	ID=SMEL_001g119120.1	Note=Similar to PP16-2: 16 kDa phloem protein 2 (Arabidopsis thaliana OX%3D3702)
SMEL3Ch01	3874884	3877042	ID=SMEL_001g119130.1	Note=Similar to CYCD3-1: Cyclin-D3-1 (Arabidopsis thaliana OX%3D3702)
SMEL3Ch01	3892662	3894504	ID=SMEL_001g119140.1	Note=Protein of unknown function
SMEL3Ch01	3898219	3899827	ID=SMEL_001g119150.1	Note=Protein of unknown function
SMEL3Ch01	3900449	3915424	ID=SMEL_001g119160.1	Note=Similar to CYCLASE2: Cyclase-like protein 2 (Arabidopsis thaliana OX%3D3702)
SMEL3Ch01	3916921	3925572	ID=SMEL_001g119170.1	Note=Similar to CYCLASE2: Cyclase-like protein 2 (Arabidopsis thaliana OX%3D3702)
SMEL3Ch01	3938733	3939881	ID=SMEL_001g119180.1	Note=Similar to FLS2: LRR receptor-like serine/threonine-protein kinase FLS2 (Oryza sativa subsp. japonica OX%3D39947)
SMEL3Ch01	3942155	3944780	ID=SMEL_001g119190.1	Note=Similar to SEP1: Stress enhanced protein 1%2C chloroplastic (Arabidopsis thaliana OX%3D3702)
SMEL3Ch01	3945452	3950790	ID=SMEL_001g119200.1	Note=Similar to At4g37250: Probable LRR receptor-like serine/threonine-protein kinase At4g37250 (Arabidopsis thaliana OX%3D3702)
SMEL3Ch01	3957125	3960658	ID=SMEL_001g119210.1	Note=Similar to TIC21: Protein TIC 21%2C chloroplastic (Arabidopsis thaliana OX%3D3702)
SMEL3Ch01	3962502	3964325	ID=SMEL_001g119220.1	Note=Protein of unknown function
SMEL3Ch01	3966041	3971989	ID=SMEL_001g119230.1	Note=Similar to RTNLB11: Reticulon-like protein B11 (Arabidopsis thaliana OX%3D3702)
SMEL3Ch01	3972719	3976041	ID=SMEL_001g119240.1	Note=Protein of unknown function
SMEL3Ch01	3977807	3986234	ID=SMEL_001g119250.1	Note=Protein of unknown function
SMEL3Ch01	3986993	3990674	ID=SMEL_001g119260.1	Note=Similar to CAD19: Probable cinnamyl alcohol dehydrogenase 2 (Nicotiana tabacum OX%3D4097)
SMEL3Ch01	3993958	4001043	ID=SMEL_001g119270.1	Note=Similar to At3g19440: RNA pseudouridine synthase 4%2C mitochondrial (Arabidopsis thaliana OX%3D3702)
SMEL3Ch01	3994189	3994353	ID=SMEL_001g119280.1	Note=Protein of unknown function
SMEL3Ch01	4003048	4003188	ID=SMEL_001g119290.1	Note=Protein of unknown function
SMEL3Ch01	4015655	4015882	ID=SMEL_001g119300.1	Note=Protein of unknown function
SMEL3Ch01	4020843	4022306	ID=SMEL_001g119310.1	Note=Similar to GT2: Cinnamate beta-D-glucosyltransferase (Fragaria ananassa OX%3D3747)
SMEL3Ch01	4034668	4039227	ID=SMEL_001g119320.1	Note=Similar to MTK: Methylthioribose kinase (Arabidopsis thaliana OX%3D3702)
SMEL3Ch01	4040091	4040691	ID=SMEL_001g119330.1	Note=Protein of unknown function
SMEL3Ch01	4048574	4051345	ID=SMEL_001g119340.1	Note=Similar to Basic secretory protease (Fragments) (Boswellia serrata OX%3D613112)
SMEL3Ch01	4056828	4077455	ID=SMEL_001g119350.1	Note=Similar to REV1: DNA repair protein REV1 (Arabidopsis thaliana OX%3D3702)
SMEL3Ch01	4080328	4082779	ID=SMEL_001g119360.1	Note=Similar to BHLH113: Transcription factor bHLH113 (Arabidopsis thaliana OX%3D3702)
SMEL3Ch01	4088300	4088987	ID=SMEL_001g119370.1	Note=Similar to At3g19508: LYR motif-containing protein At3g19508 (Arabidopsis thaliana OX%3D3702)
SMEL3Ch01	4092673	4094283	ID=SMEL_001g119380.1	Note=Protein of unknown function
SMEL3Ch01	4096770	4097848	ID=SMEL_001g119390.1	Note=Protein of unknown function
SMEL3Ch01	4104778	4105531	ID=SMEL_001g119400.1	Note=Similar to ZFP7: Zinc finger protein 7 (Arabidopsis thaliana OX%3D3702)
SMEL3Ch01	4108183	4114635	ID=SMEL_001g119410.1	Note=Similar to TIP41L: TIP41-like protein (Arabidopsis thaliana OX%3D3702)
SMEL3Ch01	4115766	4128392	ID=SMEL_001g119420.1	Note=Similar to PRH: Pathogenesis-related homeodomain protein (Petroselinum crispum OX%3D4043)
SMEL3Ch01	4167210	4173339	ID=SMEL_001g119430.1	Note=Protein of unknown function
SMEL3Ch01	4174030	4174569	ID=SMEL_001g119440.1	Note=Similar to GASA10: Gibberellin-regulated protein 10 (Arabidopsis thaliana OX%3D3702)
SMEL3Ch01	4176235	4187279	ID=SMEL_001g119450.1	Note=Protein of unknown function
SMEL3Ch01	4200396	4203832	ID=SMEL_001g119460.1	Note=Protein of unknown function
SMEL3Ch01	4211990	4214782	ID=SMEL_001g119470.1	Note=Similar to AGP18: Lysine-rich arabinogalactan protein 18 (Arabidopsis thaliana OX%3D3702)
SMEL3Ch01	4219017	4221224	ID=SMEL_001g119480.1	Note=Similar to NERD: Zinc finger CCCH domain-containing protein 19 (Arabidopsis thaliana OX%3D3702)
SMEL3Ch01	4222628	4226692	ID=SMEL_001g119490.1	Note=Similar to At5g02860: Pentatricopeptide repeat-containing protein At5g02860 (Arabidopsis thaliana OX%3D3702)
SMEL3Ch01	4227323	4230605	ID=SMEL_001g119500.1	Note=Similar to At4g33920: Probable protein phosphatase 2C 63 (Arabidopsis thaliana OX%3D3702)
SMEL3Ch01	4232970	4236836	ID=SMEL_001g119510.1	Note=Similar to RHY1A: Probable E3 ubiquitin-protein ligase RHY1A (Arabidopsis thaliana OX%3D3702)
SMEL3Ch01	4241943	4243195	ID=SMEL_001g119520.1	Note=Protein of unknown function
SMEL3Ch01	4244448	4248376	ID=SMEL_001g119530.1	Note=Protein of unknown function
SMEL3Ch01	4256809	4259303	ID=SMEL_001g119540.1	Note=Similar to LRR1: Leucine-rich repeat protein 1 (Arabidopsis thaliana OX%3D3702)
SMEL3Ch01	4261406	4268095	ID=SMEL_001g119550.1	Note=Similar to PMP22: Peroxisomal membrane protein PMP22 (Arabidopsis thaliana OX%3D3702)
SMEL3Ch01	4269107	4270195	ID=SMEL_001g119560.1	Note=Protein of unknown function
SMEL3Ch01	4275413	4276468	ID=SMEL_001g119570.1	Note=Protein of unknown function
SMEL3Ch01	4291500	4304532	ID=SMEL_001g119580.1	Note=Similar to QWRF2: QWRF motif-containing protein 2 (Arabidopsis thaliana OX%3D3702)
SMEL3Ch01	4327742	4328576	ID=SMEL_001g119590.1	Note=Similar to LBD37: LOB domain-containing protein 37 (Arabidopsis thaliana OX%3D3702)
SMEL3Ch01	4337931	4343274	ID=SMEL_001g119600.1	Note=Similar to NPY2: BTB/POZ domain-containing protein NPY2 (Arabidopsis thaliana OX%3D3702)
SMEL3Ch01	4360982	4363270	ID=SMEL_001g119610.1	Note=Similar to ZAT10: Zinc finger protein ZAT10 (Arabidopsis thaliana OX%3D3702)
SMEL3Ch01	4374698	4379850	ID=SMEL_001g119620.1	Note=Similar to BUB3.1: Mitotic checkpoint protein BUB3.1 (Arabidopsis thaliana OX%3D3702)
SMEL3Ch01	4382049	4389831	ID=SMEL_001g119630.1	Note=Protein of unknown function
SMEL3Ch01	4403854	4405474	ID=SMEL_001g119640.1	Note=Similar to BHLH84: Transcription factor bHLH84 (Arabidopsis thaliana OX%3D3702)
SMEL3Ch01	4406113	4413889	ID=SMEL_001g119650.1	Note=Similar to VSR3: Vacuolar-sorting receptor 3 (Arabidopsis thaliana OX%3D3702)
SMEL3Ch01	4415239	4418078	ID=SMEL_001g119660.1	Note=Protein of unknown function
SMEL3Ch01	4420566	4420907	ID=SMEL_001g119670.1	Note=Protein of unknown function
SMEL3Ch01	4425490	4425831	ID=SMEL_001g119680.1	Note=Protein of unknown function
SMEL3Ch01	4426853	4427194	ID=SMEL_001g119690.1	Note=Protein of unknown function
SMEL3Ch01	4431034	4431291	ID=SMEL_001g119700.1	Note=Similar to At3g50280: Uncharacterized acetyltransferase At3g50280 (Arabidopsis thaliana OX%3D3702)
SMEL3Ch01	4437537	4440080	ID=SMEL_001g119710.1	Note=Similar to At3g50280: Uncharacterized acetyltransferase At3g50280 (Arabidopsis thaliana OX%3D3702)
SMEL3Ch01	4442459	4444503	ID=SMEL_001g119720.1	Note=Similar to At1g57790: F-box/kelch-repeat protein At1g57790 (Arabidopsis thaliana OX%3D3702)
SMEL3Ch01	4445851	4449569	ID=SMEL_001g119730.1	Note=Protein of unknown function
SMEL3Ch01	4450716	4454132	ID=SMEL_001g119740.1	Note=Protein of unknown function
SMEL3Ch01	4454802	4456050	ID=SMEL_001g119750.1	Note=Protein of unknown function
SMEL3Ch01	4456534	4464012	ID=SMEL_001g119760.1	Note=Similar to POLK: DNA polymerase kappa (Arabidopsis thaliana OX%3D3702)
SMEL3Ch01	4466349	4470558	ID=SMEL_001g119770.1	Note=Similar to At4g33820: Endo-1%2C4-beta-xylanase 5-like (Arabidopsis thaliana OX%3D3702)
SMEL3Ch01	4473881	4486076	ID=SMEL_001g119780.1	Note=Similar to At4g33820: Endo-1%2C4-beta-xylanase 5-like (Arabidopsis thaliana OX%3D3702)
SMEL3Ch01	4769389	4771100	ID=SMEL_001g119790.1	Note=Protein of unknown function
SMEL3Ch01	4773865	4776853	ID=SMEL_001g119800.1	Note=Protein of unknown function
SMEL3Ch01	4790537	4791794	ID=SMEL_001g119810.1	Note=Similar to XTH10: Probable xyloglucan endotransglucosylase/hydrolase protein 10 (Arabidopsis thaliana OX%3D3702)
SMEL3Ch01	4794846	4795605	ID=SMEL_001g119820.1	Note=Similar to TPS3: (-)-camphene/tricyclene synthase%2C chloroplastic (Solanum lycopersicum OX%3D4081)
SMEL3Ch01	4806232	4808285	ID=SMEL_001g119830.1	Note=Similar to Basic form of pathogenesis-related protein 1 (Nicotiana tabacum OX%3D4097)
SMEL3Ch01	4810078	4810482	ID=SMEL_001g119840.1	Note=Similar to Basic form of pathogenesis-related protein 1 (Nicotiana tabacum OX%3D4097)
SMEL3Ch01	4812306	4812842	ID=SMEL_001g119850.1	Note=Similar to Basic form of pathogenesis-related protein 1 (Nicotiana tabacum OX%3D4097)
SMEL3Ch01	4815273	4815677	ID=SMEL_001g119860.1	Note=Similar to Basic form of pathogenesis-related protein 1 (Nicotiana tabacum OX%3D4097)
SMEL3Ch01	4823680	4824189	ID=SMEL_001g119870.1	Note=Similar to Basic form of pathogenesis-related protein 1 (Nicotiana tabacum OX%3D4097)
SMEL3Ch01	4828452	4831191	ID=SMEL_001g119880.1	Note=Similar to Pathogenesis-related protein 1A1 (Solanum lycopersicum OX%3D4081)
SMEL3Ch01	4833573	4834146	ID=SMEL_001g119890.1	Note=Similar to Pathogenesis-related protein 1B (Nicotiana tabacum OX%3D4097)
SMEL3Ch01	4836161	4836703	ID=SMEL_001g119900.1	Note=Similar to Pathogenesis-related protein 1B (Nicotiana tabacum OX%3D4097)
SMEL3Ch01	4839034	4849613	ID=SMEL_001g119910.1	Note=Similar to CGR3: Probable pectin methylesterase CGR3 (Arabidopsis thaliana OX%3D3702)
SMEL3Ch01	4853484	4853588	ID=SMEL_001g119920.1	Note=Protein of unknown function
SMEL3Ch01	4853507	4861735	ID=SMEL_001g119930.1	Note=Similar to CBSDUF3: DUF21 domain-containing protein At2g14520 (Arabidopsis thaliana OX%3D3702)
SMEL3Ch01	4855097	4855201	ID=SMEL_001g119940.1	Note=Protein of unknown function
SMEL3Ch01	4863767	4867288	ID=SMEL_001g119950.1	Note=Protein of unknown function
SMEL3Ch01	4873123	4877009	ID=SMEL_001g119960.1	Note=Protein of unknown function
SMEL3Ch01	4877455	4878289	ID=SMEL_001g119970.1	Note=Protein of unknown function
SMEL3Ch01	4881474	4882580	ID=SMEL_001g119980.1	Note=Protein of unknown function
SMEL3Ch01	4884394	4885137	ID=SMEL_001g119990.1	Note=Protein of unknown function
SMEL3Ch01	4886811	4890045	ID=SMEL_001g120000.1	Note=Similar to RLK7: Receptor-like protein kinase 7 (Arabidopsis thaliana OX%3D3702)
SMEL3Ch01	4896283	4899043	ID=SMEL_001g120010.1	Note=Similar to Malate dehydrogenase%2C glyoxysomal (Citrullus lanatus OX%3D3654)
SMEL3Ch01	4899103	4901869	ID=SMEL_001g120020.1	Note=Protein of unknown function
SMEL3Ch01	4908937	4911833	ID=SMEL_001g120030.1	Note=Similar to BHLH25: Transcription factor bHLH25 (Arabidopsis thaliana OX%3D3702)
SMEL3Ch01	4916022	4919515	ID=SMEL_001g120040.1	Note=Similar to LGALDH: L-galactose dehydrogenase (Arabidopsis thaliana OX%3D3702)
SMEL3Ch01	4921518	4930784	ID=SMEL_001g120050.1	Note=Similar to PAT23: Probable protein S-acyltransferase 23 (Arabidopsis thaliana OX%3D3702)
SMEL3Ch01	4931775	4935719	ID=SMEL_001g120060.1	Note=Similar to PPA6: Soluble inorganic pyrophosphatase 6%2C chloroplastic (Arabidopsis thaliana OX%3D3702)
SMEL3Ch01	4936480	4948564	ID=SMEL_001g120070.1	Note=Similar to At5g64500: Probable sphingolipid transporter spinster homolog 2 (Arabidopsis thaliana OX%3D3702)
SMEL3Ch01	4950534	4951415	ID=SMEL_001g120080.1	Note=Similar to MSRB5: Peptide methionine sulfoxide reductase B5 (Oryza sativa subsp. japonica OX%3D39947)
SMEL3Ch01	4953601	4956252	ID=SMEL_001g120090.1	Note=Similar to HEMA1: Glutamyl-tRNA reductase 1%2C chloroplastic (Cucumis sativus OX%3D3659)
SMEL3Ch01	4957666	4958199	ID=SMEL_001g120100.1	Note=Protein of unknown function
SMEL3Ch01	4959304	4959837	ID=SMEL_001g120110.1	Note=Protein of unknown function
SMEL3Ch01	4961629	4965601	ID=SMEL_001g120120.1	Note=Similar to TBL12: Protein trichome birefringence-like 12 (Arabidopsis thaliana OX%3D3702)
SMEL3Ch01	4966592	4975699	ID=SMEL_001g120130.1	Note=Similar to FAAH: Fatty acid amide hydrolase (Arabidopsis thaliana OX%3D3702)
SMEL3Ch01	4980108	4988774	ID=SMEL_001g120140.1	Note=Similar to FAAH: Fatty acid amide hydrolase (Arabidopsis thaliana OX%3D3702)
SMEL3Ch01	4992933	5000170	ID=SMEL_001g120150.1	Note=Similar to FAAH: Fatty acid amide hydrolase (Arabidopsis thaliana OX%3D3702)
SMEL3Ch01	5001489	5011151	ID=SMEL_001g120160.1	Note=Similar to FAAH: Fatty acid amide hydrolase (Arabidopsis thaliana OX%3D3702)
SMEL3Ch01	5013734	5016947	ID=SMEL_001g120170.1	Note=Similar to FAAH: Fatty acid amide hydrolase (Arabidopsis thaliana OX%3D3702)
SMEL3Ch01	5031527	5033020	ID=SMEL_001g120180.1	Note=Protein of unknown function
SMEL3Ch01	5049663	5050422	ID=SMEL_001g120190.1	Note=Protein of unknown function
SMEL3Ch01	5059844	5065947	ID=SMEL_001g120200.1	Note=Protein of unknown function
SMEL3Ch01	5068441	5071052	ID=SMEL_001g120210.1	Note=Similar to GTE7: Transcription factor GTE7 (Arabidopsis thaliana OX%3D3702)
SMEL3Ch01	5072417	5075761	ID=SMEL_001g120220.1	Note=Similar to HSP68: Heat shock 70 kDa protein%2C mitochondrial (Solanum tuberosum OX%3D4113)
SMEL3Ch01	5078062	5079811	ID=SMEL_001g120230.1	Note=Similar to N: TMV resistance protein N (Nicotiana glutinosa OX%3D35889)
SMEL3Ch01	5080929	5082703	ID=SMEL_001g120240.1	Note=Similar to At5g66980: Putative B3 domain-containing protein At5g66980 (Arabidopsis thaliana OX%3D3702)
SMEL3Ch01	5082718	5094443	ID=SMEL_001g120250.1	Note=Protein of unknown function
SMEL3Ch01	5096119	5100347	ID=SMEL_001g120260.1	Note=Similar to HSP68: Heat shock 70 kDa protein%2C mitochondrial (Solanum tuberosum OX%3D4113)
SMEL3Ch01	5103715	5113406	ID=SMEL_001g120270.1	Note=Similar to OPT4: Oligopeptide transporter 4 (Arabidopsis thaliana OX%3D3702)
SMEL3Ch01	5108549	5118901	ID=SMEL_001g120280.1	Note=Protein of unknown function
SMEL3Ch01	5122524	5140915	ID=SMEL_001g120290.1	Note=Protein of unknown function
SMEL3Ch01	5130588	5131326	ID=SMEL_001g120300.1	Note=Similar to MADS27: MADS-box transcription factor 27 (Oryza sativa subsp. japonica OX%3D39947)
SMEL3Ch01	5142782	5146177	ID=SMEL_001g120310.1	Note=Similar to AGL21: Agamous-like MADS-box protein AGL21 (Arabidopsis thaliana OX%3D3702)
SMEL3Ch01	5158991	5161138	ID=SMEL_001g120320.1	Note=Similar to LECRK91: L-type lectin-domain containing receptor kinase IX.1 (Arabidopsis thaliana OX%3D3702)
SMEL3Ch01	5161773	5162147	ID=SMEL_001g120330.1	Note=Protein of unknown function
SMEL3Ch01	5162922	5164064	ID=SMEL_001g120340.1	Note=Protein of unknown function
SMEL3Ch01	5166088	5167228	ID=SMEL_001g120350.1	Note=Protein of unknown function
SMEL3Ch01	5167955	5168695	ID=SMEL_001g120360.1	Note=Protein of unknown function
SMEL3Ch01	5209649	5210614	ID=SMEL_001g120370.1	Note=Similar to At1g18265: Protein FLOURY 1-like (Arabidopsis thaliana OX%3D3702)
SMEL3Ch01	5211348	5214750	ID=SMEL_001g120380.1	Note=Similar to PPD1: PsbP domain-containing protein 1%2C chloroplastic (Arabidopsis thaliana OX%3D3702)
SMEL3Ch01	5216626	5223241	ID=SMEL_001g120390.1	Note=Similar to ALDH6B2: Methylmalonate-semialdehyde dehydrogenase [acylating]%2C mitochondrial (Arabidopsis thaliana OX%3D3702)
SMEL3Ch01	5223447	5223824	ID=SMEL_001g120400.1	Note=Protein of unknown function
SMEL3Ch01	5238041	5241877	ID=SMEL_001g120410.1	Note=Similar to GGP5: Gamma-glutamyl peptidase 5 (Arabidopsis thaliana OX%3D3702)
SMEL3Ch01	5251874	5265884	ID=SMEL_001g120420.1	Note=Similar to DRP3A: Dynamin-related protein 3A (Arabidopsis thaliana OX%3D3702)
SMEL3Ch01	5265647	5265862	ID=SMEL_001g120430.1	Note=Protein of unknown function
SMEL3Ch01	5266448	5272563	ID=SMEL_001g120440.1	Note=Similar to GATA24: GATA transcription factor 24 (Arabidopsis thaliana OX%3D3702)
SMEL3Ch01	5325575	5335457	ID=SMEL_001g120460.1	Note=Similar to R1A: Late blight resistance protein R1-A (Solanum demissum OX%3D50514)
SMEL3Ch01	5337525	5348885	ID=SMEL_001g120470.1	Note=Similar to PRAF1: PH%2C RCC1 and FYVE domains-containing protein 1 (Arabidopsis thaliana OX%3D3702)
SMEL3Ch01	5351957	5353582	ID=SMEL_001g120480.1	Note=Similar to ycf2-A: Protein Ycf2 (Morus indica OX%3D248361)
SMEL3Ch01	5355991	5356620	ID=SMEL_001g120490.1	Note=Similar to rps12-B: 30S ribosomal protein S12-B%2C chloroplastic (Populus trichocarpa OX%3D3694)
SMEL3Ch01	5386038	5387495	ID=SMEL_001g120500.1	Note=Similar to MYB113: Transcription factor MYB113 (Arabidopsis thaliana OX%3D3702)
SMEL3Ch01	5454106	5455866	ID=SMEL_001g120510.1	Note=Similar to OPR11: Putative 12-oxophytodienoate reductase 11 (Oryza sativa subsp. japonica OX%3D39947)
SMEL3Ch01	5459954	5463583	ID=SMEL_001g120520.1	Note=Similar to UGT86A1: UDP-glycosyltransferase 86A1 (Arabidopsis thaliana OX%3D3702)
SMEL3Ch01	5468246	5471891	ID=SMEL_001g120530.1	Note=Similar to OPR1: 12-oxophytodienoate reductase 1 (Solanum lycopersicum OX%3D4081)
SMEL3Ch01	5479947	5485294	ID=SMEL_001g120540.1	Note=Protein of unknown function
SMEL3Ch01	5498284	5503536	ID=SMEL_001g120550.1	Note=Similar to ADK2: Adenosine kinase 2 (Arabidopsis thaliana OX%3D3702)
SMEL3Ch01	5520092	5521980	ID=SMEL_001g120560.1	Note=Similar to OPR2: 12-oxophytodienoate reductase-like protein (Solanum lycopersicum OX%3D4081)
SMEL3Ch01	5523629	5527285	ID=SMEL_001g120570.1	Note=Similar to PALA: Phenylalanine ammonia-lyase (Nicotiana tabacum OX%3D4097)
SMEL3Ch01	5541649	5543826	ID=SMEL_001g120580.1	Note=Similar to ycf2-A: Protein Ycf2 (Solanum lycopersicum OX%3D4081)
SMEL3Ch01	5549501	5553881	ID=SMEL_001g120590.1	Note=Similar to TD1: Threonine dehydratase 1 biosynthetic%2C chloroplastic (Solanum lycopersicum OX%3D4081)
SMEL3Ch01	5553936	5555225	ID=SMEL_001g120600.1	Note=Similar to AMI1: Amidase 1 (Arabidopsis thaliana OX%3D3702)
SMEL3Ch01	5559937	5564373	ID=SMEL_001g120610.1	Note=Similar to 29 kDa ribonucleoprotein B%2C chloroplastic (Nicotiana sylvestris OX%3D4096)
SMEL3Ch01	5564120	5568801	ID=SMEL_001g120620.1	Note=Similar to At5g03250: BTB/POZ domain-containing protein At5g03250 (Arabidopsis thaliana OX%3D3702)
SMEL3Ch01	5585292	5587680	ID=SMEL_001g120630.1	Note=Similar to ARF18: Auxin response factor 18 (Oryza sativa subsp. japonica OX%3D39947)
SMEL3Ch01	5593464	5604276	ID=SMEL_001g120640.1	Note=Similar to gba_locus_10451: CASP-like protein 5A1 (Ginkgo biloba OX%3D3311)
SMEL3Ch01	5608559	5609017	ID=SMEL_001g120650.1	Note=Protein of unknown function
SMEL3Ch01	5673199	5673657	ID=SMEL_001g120660.1	Note=Protein of unknown function
SMEL3Ch01	5740387	5740845	ID=SMEL_001g120670.1	Note=Protein of unknown function
SMEL3Ch01	5766744	5770532	ID=SMEL_001g120680.1	Note=Similar to ABCG11: ABC transporter G family member 11 (Arabidopsis thaliana OX%3D3702)
SMEL3Ch01	5778872	5783836	ID=SMEL_001g120690.1	Note=Similar to ABCG11: ABC transporter G family member 11 (Arabidopsis thaliana OX%3D3702)
SMEL3Ch01	5787781	5790382	ID=SMEL_001g120700.1	Note=Similar to ABCG11: ABC transporter G family member 11 (Arabidopsis thaliana OX%3D3702)
SMEL3Ch01	5793267	5804320	ID=SMEL_001g120710.1	Note=Similar to DHS2: Phospho-2-dehydro-3-deoxyheptonate aldolase 2%2C chloroplastic (Arabidopsis thaliana OX%3D3702)
SMEL3Ch01	5808538	5809446	ID=SMEL_001g120720.1	Note=Similar to EXL2: Protein EXORDIUM-like 2 (Arabidopsis thaliana OX%3D3702)
SMEL3Ch01	5830526	5833359	ID=SMEL_001g120730.1	Note=Protein of unknown function
SMEL3Ch01	5839424	5841991	ID=SMEL_001g120740.1	Note=Similar to UGT85A24: 7-deoxyloganetin glucosyltransferase (Gardenia jasminoides OX%3D114476)
SMEL3Ch01	5843374	5850415	ID=SMEL_001g120750.1	Note=Similar to DJA7A: Chaperone protein dnaJ A7A%2C chloroplastic (Oryza sativa subsp. japonica OX%3D39947)
SMEL3Ch01	5854282	5859931	ID=SMEL_001g120760.1	Note=Similar to MBD8: Methyl-CpG-binding domain-containing protein 8 (Arabidopsis thaliana OX%3D3702)
SMEL3Ch01	5860969	5863512	ID=SMEL_001g120770.1	Note=Similar to AMC2: Metacaspase-2 (Arabidopsis thaliana OX%3D3702)
SMEL3Ch01	5867886	5869834	ID=SMEL_001g120780.1	Note=Similar to AMC3: Metacaspase-3 (Arabidopsis thaliana OX%3D3702)
SMEL3Ch01	5873629	5875765	ID=SMEL_001g120790.1	Note=Similar to AMC3: Metacaspase-3 (Arabidopsis thaliana OX%3D3702)
SMEL3Ch01	5876137	5878721	ID=SMEL_001g120800.1	Note=Protein of unknown function
SMEL3Ch01	5881083	5885459	ID=SMEL_001g120810.1	Note=Similar to At1g34750: Probable protein phosphatase 2C 10 (Arabidopsis thaliana OX%3D3702)
SMEL3Ch01	5892227	5900664	ID=SMEL_001g120820.1	Note=Similar to TOM1: Tobamovirus multiplication protein 1 (Arabidopsis thaliana OX%3D3702)
SMEL3Ch01	5901312	5901752	ID=SMEL_001g120830.1	Note=Protein of unknown function
SMEL3Ch01	5903515	5904039	ID=SMEL_001g120840.1	Note=Protein of unknown function
SMEL3Ch01	5906469	5911469	ID=SMEL_001g120850.1	Note=Similar to UBP4: Ubiquitin carboxyl-terminal hydrolase 4 (Arabidopsis thaliana OX%3D3702)
SMEL3Ch01	5911896	5924282	ID=SMEL_001g120860.1	Note=Similar to CAMTA2: Calmodulin-binding transcription activator 2 (Arabidopsis thaliana OX%3D3702)
SMEL3Ch01	5925578	5927938	ID=SMEL_001g120870.1	Note=Similar to AOMI 1: Ubiquinol oxidase%2C mitochondrial (Mangifera indica OX%3D29780)
SMEL3Ch01	5928128	5933051	ID=SMEL_001g120880.1	Note=Similar to DAR1: Protein DA1-related 1 (Arabidopsis thaliana OX%3D3702)
SMEL3Ch01	5941592	5945834	ID=SMEL_001g120890.1	Note=Similar to DA1: Protein DA1 (Arabidopsis thaliana OX%3D3702)
SMEL3Ch01	5954031	5958401	ID=SMEL_001g120900.1	Note=Similar to DA1: Protein DA1 (Arabidopsis thaliana OX%3D3702)
SMEL3Ch01	5963295	5982022	ID=SMEL_001g120910.1	Note=Similar to PAA1: Copper-transporting ATPase PAA1%2C chloroplastic (Arabidopsis thaliana OX%3D3702)
SMEL3Ch01	5982241	5992122	ID=SMEL_001g120920.1	Note=Similar to POT7: Potassium transporter 7 (Arabidopsis thaliana OX%3D3702)
SMEL3Ch01	6002561	6009362	ID=SMEL_001g120930.1	Note=Similar to SC35: Serine/arginine-rich splicing factor SC35 (Arabidopsis thaliana OX%3D3702)
SMEL3Ch01	6013013	6016191	ID=SMEL_001g120940.1	Note=Protein of unknown function
SMEL3Ch01	6021218	6021460	ID=SMEL_001g120950.1	Note=Similar to Auxin-responsive protein SAUR50 (Helianthus annuus OX%3D4232)
SMEL3Ch01	6030701	6039016	ID=SMEL_001g120960.1	Note=Similar to LNK1: Protein LNK1 (Arabidopsis thaliana OX%3D3702)
SMEL3Ch01	6039230	6039463	ID=SMEL_001g120970.1	Note=Protein of unknown function
SMEL3Ch01	6042002	6051262	ID=SMEL_001g120980.1	Note=Protein of unknown function
SMEL3Ch01	6052319	6055480	ID=SMEL_001g120990.1	Note=Similar to At3g25440: Uncharacterized CRM domain-containing protein At3g25440%2C chloroplastic (Arabidopsis thaliana OX%3D3702)
SMEL3Ch01	6057162	6059443	ID=SMEL_001g121000.1	Note=Similar to At2g26730: Probable inactive receptor kinase At2g26730 (Arabidopsis thaliana OX%3D3702)
SMEL3Ch01	6060924	6062490	ID=SMEL_001g121010.1	Note=Similar to poxN1: Peroxidase N1 (Nicotiana tabacum OX%3D4097)
SMEL3Ch01	6075151	6079184	ID=SMEL_001g121020.1	Note=Protein of unknown function
SMEL3Ch01	6079415	6085366	ID=SMEL_001g121030.1	Note=Similar to CAP10B: Chlorophyll a-b binding protein CP24 10B%2C chloroplastic (Solanum lycopersicum OX%3D4081)
SMEL3Ch01	6081582	6084990	ID=SMEL_001g121040.1	Note=Similar to WTF9: Protein WHAT'S THIS FACTOR 9%2C mitochondrial (Arabidopsis thaliana OX%3D3702)
SMEL3Ch01	6086462	6095181	ID=SMEL_001g121050.1	Note=Similar to Os10g0370000: Probable protein phosphatase 2C 71 (Oryza sativa subsp. japonica OX%3D39947)
SMEL3Ch01	6107173	6109129	ID=SMEL_001g121060.1	Note=Similar to At5g64080: Non-specific lipid-transfer protein-like protein At5g64080 (Arabidopsis thaliana OX%3D3702)
SMEL3Ch01	6110808	6112927	ID=SMEL_001g121070.1	Note=Similar to NAKR1: Protein SODIUM POTASSIUM ROOT DEFECTIVE 1 (Arabidopsis thaliana OX%3D3702)
SMEL3Ch01	6114697	6118202	ID=SMEL_001g121080.1	Note=Protein of unknown function
SMEL3Ch01	6123686	6126251	ID=SMEL_001g121090.1	Note=Similar to At1g22040: F-box/kelch-repeat protein At1g22040 (Arabidopsis thaliana OX%3D3702)
SMEL3Ch01	6126384	6136102	ID=SMEL_001g121100.1	Note=Similar to BAK1: BRASSINOSTEROID INSENSITIVE 1-associated receptor kinase 1 (Arabidopsis thaliana OX%3D3702)
SMEL3Ch01	6149665	6152200	ID=SMEL_001g121110.1	Note=Similar to Xyl2: Beta-xylosidase/alpha-L-arabinofuranosidase 2 (Medicago sativa subsp. varia OX%3D36902)
SMEL3Ch01	6151681	6159241	ID=SMEL_001g121120.1	Note=Similar to BAK1: BRASSINOSTEROID INSENSITIVE 1-associated receptor kinase 1 (Arabidopsis thaliana OX%3D3702)
SMEL3Ch01	6173161	6178160	ID=SMEL_001g121130.1	Note=Similar to Xyl2: Beta-xylosidase/alpha-L-arabinofuranosidase 2 (Medicago sativa subsp. varia OX%3D36902)
SMEL3Ch01	6179103	6188940	ID=SMEL_001g121140.1	Note=Similar to NSF: Vesicle-fusing ATPase (Arabidopsis thaliana OX%3D3702)
SMEL3Ch01	6218192	6220063	ID=SMEL_001g121150.1	Note=Similar to WRKY19: Probable WRKY transcription factor 19 (Arabidopsis thaliana OX%3D3702)
SMEL3Ch01	6228791	6229655	ID=SMEL_001g121160.1	Note=Similar to NAC104: NAC domain-containing protein 104 (Arabidopsis thaliana OX%3D3702)
SMEL3Ch01	6238734	6240594	ID=SMEL_001g121170.1	Note=Protein of unknown function
SMEL3Ch01	6241480	6265972	ID=SMEL_001g121180.1	Note=Similar to PSD2: Phosphatidylserine decarboxylase proenzyme 2 (Arabidopsis thaliana OX%3D3702)
SMEL3Ch01	6266166	6268216	ID=SMEL_001g121190.1	Note=Similar to At1g03050: Putative clathrin assembly protein At1g03050 (Arabidopsis thaliana OX%3D3702)
SMEL3Ch01	6271272	6273240	ID=SMEL_001g121200.1	Note=Similar to PER43: Peroxidase 43 (Arabidopsis thaliana OX%3D3702)
SMEL3Ch01	6276021	6281361	ID=SMEL_001g121210.1	Note=Similar to SCPL42: Serine carboxypeptidase-like 42 (Arabidopsis thaliana OX%3D3702)
SMEL3Ch01	6285503	6289927	ID=SMEL_001g121220.1	Note=Similar to RZ1A: Glycine-rich RNA-binding protein RZ1A (Arabidopsis thaliana OX%3D3702)
SMEL3Ch01	6290892	6291506	ID=SMEL_001g121230.1	Note=Similar to At3g43660: Vacuolar iron transporter homolog 4 (Arabidopsis thaliana OX%3D3702)
SMEL3Ch01	6294325	6294984	ID=SMEL_001g121240.1	Note=Similar to At3g43660: Vacuolar iron transporter homolog 4 (Arabidopsis thaliana OX%3D3702)
SMEL3Ch01	6297256	6297903	ID=SMEL_001g121250.1	Note=Similar to At3g43660: Vacuolar iron transporter homolog 4 (Arabidopsis thaliana OX%3D3702)
SMEL3Ch01	6298601	6301004	ID=SMEL_001g121260.1	Note=Protein of unknown function
SMEL3Ch01	6303753	6305522	ID=SMEL_001g121270.1	Note=Protein of unknown function
SMEL3Ch01	6316371	6316997	ID=SMEL_001g121280.1	Note=Similar to At3g43660: Vacuolar iron transporter homolog 4 (Arabidopsis thaliana OX%3D3702)
SMEL3Ch01	6321043	6322659	ID=SMEL_001g121290.1	Note=Similar to At1g09380: WAT1-related protein At1g09380 (Arabidopsis thaliana OX%3D3702)
SMEL3Ch01	6330698	6333462	ID=SMEL_001g121300.1	Note=Similar to AC101: Actin-101 (Solanum tuberosum OX%3D4113)
SMEL3Ch01	6337388	6338590	ID=SMEL_001g121310.1	Note=Protein of unknown function
SMEL3Ch01	6345599	6347215	ID=SMEL_001g121320.1	Note=Similar to At1g09380: WAT1-related protein At1g09380 (Arabidopsis thaliana OX%3D3702)
SMEL3Ch01	6349486	6351181	ID=SMEL_001g121330.1	Note=Protein of unknown function
SMEL3Ch01	6356202	6357049	ID=SMEL_001g121340.1	Note=Protein of unknown function
SMEL3Ch01	6358671	6360838	ID=SMEL_001g121350.1	Note=Protein of unknown function
SMEL3Ch01	6362701	6363913	ID=SMEL_001g121360.1	Note=Protein of unknown function
SMEL3Ch01	6369991	6374264	ID=SMEL_001g121370.1	Note=Similar to TULP8: Tubby-like F-box protein 8 (Oryza sativa subsp. japonica OX%3D39947)
SMEL3Ch01	6375409	6376584	ID=SMEL_001g121380.1	Note=Protein of unknown function
SMEL3Ch01	6380269	6385333	ID=SMEL_001g121390.1	Note=Similar to BZIP12: bZIP transcription factor 12 (Oryza sativa subsp. japonica OX%3D39947)
SMEL3Ch01	6386214	6388870	ID=SMEL_001g121400.1	Note=Similar to AC100: Actin-100 (Fragment) (Solanum tuberosum OX%3D4113)
SMEL3Ch01	6391943	6406822	ID=SMEL_001g121410.1	Note=Similar to MAA3: Probable helicase MAGATAMA 3 (Arabidopsis thaliana OX%3D3702)
SMEL3Ch01	6496442	6499574	ID=SMEL_001g121420.1	Note=Similar to (-)-alpha-terpineol synthase (Vitis vinifera OX%3D29760)
SMEL3Ch01	6501562	6513952	ID=SMEL_001g121430.1	Note=Similar to TPS3: (-)-camphene/tricyclene synthase%2C chloroplastic (Solanum lycopersicum OX%3D4081)
SMEL3Ch01	6537147	6538002	ID=SMEL_001g121440.1	Note=Similar to TPS5: (R)-linalool synthase TPS5%2C chloroplastic (Solanum lycopersicum OX%3D4081)
SMEL3Ch01	6538403	6540495	ID=SMEL_001g121450.1	Note=Similar to TPS5: (R)-linalool synthase TPS5%2C chloroplastic (Solanum lycopersicum OX%3D4081)
SMEL3Ch01	6552889	6556351	ID=SMEL_001g121460.1	Note=Similar to TPS3: (-)-camphene/tricyclene synthase%2C chloroplastic (Solanum lycopersicum OX%3D4081)
SMEL3Ch01	6559632	6573731	ID=SMEL_001g121470.1	Note=Similar to ULP2B: Probable ubiquitin-like-specific protease 2B (Arabidopsis thaliana OX%3D3702)
SMEL3Ch01	6575944	6582044	ID=SMEL_001g121480.1	Note=Similar to At5g09550: Guanosine nucleotide diphosphate dissociation inhibitor At5g09550 (Arabidopsis thaliana OX%3D3702)
SMEL3Ch01	6582785	6589540	ID=SMEL_001g121490.1	Note=Similar to J: MADS-box protein JOINTLESS (Solanum lycopersicum OX%3D4081)
SMEL3Ch01	6596433	6597764	ID=SMEL_001g121500.1	Note=Protein of unknown function
SMEL3Ch01	6604282	6606516	ID=SMEL_001g121510.1	Note=Similar to At4g38065: Uncharacterized protein At4g38065 (Arabidopsis thaliana OX%3D3702)
SMEL3Ch01	6613100	6615277	ID=SMEL_001g121520.1	Note=Similar to PELPK1: Protein PELPK1 (Arabidopsis thaliana OX%3D3702)
SMEL3Ch01	6617369	6618078	ID=SMEL_001g121530.1	Note=Similar to PELPK1: Protein PELPK1 (Arabidopsis thaliana OX%3D3702)
SMEL3Ch01	6620179	6620991	ID=SMEL_001g121540.1	Note=Similar to PELPK1: Protein PELPK1 (Arabidopsis thaliana OX%3D3702)
SMEL3Ch01	6622226	6623038	ID=SMEL_001g121550.1	Note=Similar to PELPK1: Protein PELPK1 (Arabidopsis thaliana OX%3D3702)
SMEL3Ch01	6630859	6631686	ID=SMEL_001g121560.1	Note=Similar to PELPK1: Protein PELPK1 (Arabidopsis thaliana OX%3D3702)
SMEL3Ch01	6635756	6636049	ID=SMEL_001g121570.1	Note=Protein of unknown function
SMEL3Ch01	6640055	6641284	ID=SMEL_001g121580.1	Note=Protein of unknown function
SMEL3Ch01	6644836	6647109	ID=SMEL_001g121590.1	Note=Similar to FKBP12: Peptidyl-prolyl cis-trans isomerase FKBP12 (Vicia faba OX%3D3906)
SMEL3Ch01	6649575	6652451	ID=SMEL_001g121600.1	Note=Similar to BHLH143: Transcription factor bHLH143 (Arabidopsis thaliana OX%3D3702)
SMEL3Ch01	6654677	6658028	ID=SMEL_001g121610.1	Note=Similar to RPT3: Root phototropism protein 3 (Arabidopsis thaliana OX%3D3702)
SMEL3Ch01	6661357	6665939	ID=SMEL_001g121620.1	Note=Similar to PEPKR2: Serine/threonine-protein kinase PEPKR2 (Arabidopsis thaliana OX%3D3702)
SMEL3Ch01	6669357	6670778	ID=SMEL_001g121630.1	Note=Similar to DLO2: Protein DMR6-LIKE OXYGENASE 2 (Arabidopsis thaliana OX%3D3702)
SMEL3Ch01	6671990	6674777	ID=SMEL_001g121640.1	Note=Similar to DLO2: Protein DMR6-LIKE OXYGENASE 2 (Arabidopsis thaliana OX%3D3702)
SMEL3Ch01	6684419	6685318	ID=SMEL_001g121650.1	Note=Similar to Calmodulin (Triticum aestivum OX%3D4565)
SMEL3Ch01	6690418	6691866	ID=SMEL_001g121660.1	Note=Similar to ATL54: RING-H2 finger protein ATL54 (Arabidopsis thaliana OX%3D3702)
SMEL3Ch01	6693458	6695155	ID=SMEL_001g121670.1	Note=Similar to ATL54: RING-H2 finger protein ATL54 (Arabidopsis thaliana OX%3D3702)
SMEL3Ch01	6696776	6697404	ID=SMEL_001g121680.1	Note=Similar to ATL54: RING-H2 finger protein ATL54 (Arabidopsis thaliana OX%3D3702)
SMEL3Ch01	6698720	6699076	ID=SMEL_001g121690.1	Note=Similar to DRP4A: Putative dynamin-related protein 4A (Arabidopsis thaliana OX%3D3702)
SMEL3Ch01	6700908	6703090	ID=SMEL_001g121700.1	Note=Protein of unknown function
SMEL3Ch01	6705679	6708777	ID=SMEL_001g121710.1	Note=Similar to BEAT: Acetyl-CoA-benzylalcohol acetyltransferase (Clarkia breweri OX%3D36903)
SMEL3Ch01	6711720	6712737	ID=SMEL_001g121720.1	Note=Similar to ACT: Vinorine synthase (Rauvolfia serpentina OX%3D4060)
SMEL3Ch01	6713186	6719482	ID=SMEL_001g121730.1	Note=Protein of unknown function
SMEL3Ch01	6721589	6722863	ID=SMEL_001g121740.1	Note=Similar to BEAT: Acetyl-CoA-benzylalcohol acetyltransferase (Clarkia breweri OX%3D36903)
SMEL3Ch01	6723540	6729522	ID=SMEL_001g121750.1	Note=Similar to RIBA1: Bifunctional riboflavin biosynthesis protein RIBA 1%2C chloroplastic (Arabidopsis thaliana OX%3D3702)
SMEL3Ch01	6734725	6737961	ID=SMEL_001g121760.1	Note=Similar to MPK16: Mitogen-activated protein kinase 16 (Arabidopsis thaliana OX%3D3702)
SMEL3Ch01	6748740	6752918	ID=SMEL_001g121770.1	Note=Similar to DIT2-1: Dicarboxylate transporter 2.1%2C chloroplastic (Arabidopsis thaliana OX%3D3702)
SMEL3Ch01	6755316	6768326	ID=SMEL_001g121780.1	Note=Similar to MCM9: Probable DNA helicase MCM9 (Arabidopsis thaliana OX%3D3702)
SMEL3Ch01	6769483	6787897	ID=SMEL_001g121790.1	Note=Similar to At4g33820: Endo-1%2C4-beta-xylanase 5-like (Arabidopsis thaliana OX%3D3702)
SMEL3Ch01	6790639	6797153	ID=SMEL_001g121800.1	Note=Similar to ABC4: 2-carboxy-1%2C4-naphthoquinone phytyltransferase%2C chloroplastic (Arabidopsis thaliana OX%3D3702)
SMEL3Ch01	6805835	6809270	ID=SMEL_001g121810.1	Note=Similar to ABCG11: ABC transporter G family member 11 (Arabidopsis thaliana OX%3D3702)
SMEL3Ch01	6827341	6832465	ID=SMEL_001g121820.1	Note=Similar to At2g06000: Pentatricopeptide repeat-containing protein At2g06000 (Arabidopsis thaliana OX%3D3702)
SMEL3Ch01	6834309	6834671	ID=SMEL_001g121830.1	Note=Protein of unknown function
SMEL3Ch01	6843937	6848400	ID=SMEL_001g121840.1	Note=Similar to CSN8: COP9 signalosome complex subunit 8 (Arabidopsis thaliana OX%3D3702)
SMEL3Ch01	6850810	6854109	ID=SMEL_001g121850.1	Note=Similar to RPL3: 60S ribosomal protein L3 (Oryza sativa subsp. japonica OX%3D39947)
SMEL3Ch01	6855701	6858718	ID=SMEL_001g121860.1	Note=Similar to NHL13: NDR1/HIN1-like protein 13 (Arabidopsis thaliana OX%3D3702)
SMEL3Ch01	6861653	6867870	ID=SMEL_001g121870.1	Note=Similar to NDC80: Kinetochore protein NDC80 homolog (Arabidopsis thaliana OX%3D3702)
SMEL3Ch01	6868144	6874652	ID=SMEL_001g121880.1	Note=Protein of unknown function
SMEL3Ch01	6878318	6880713	ID=SMEL_001g121890.1	Note=Similar to WRKY9: Probable WRKY transcription factor 9 (Arabidopsis thaliana OX%3D3702)
SMEL3Ch01	6894635	6902371	ID=SMEL_001g121900.1	Note=Protein of unknown function
SMEL3Ch01	6908181	6920709	ID=SMEL_001g121910.1	Note=Similar to MEKK1: Mitogen-activated protein kinase kinase kinase 1 (Arabidopsis thaliana OX%3D3702)
SMEL3Ch01	6923449	6928962	ID=SMEL_001g121920.1	Note=Similar to MSI1: WD-40 repeat-containing protein MSI1 (Solanum lycopersicum OX%3D4081)
SMEL3Ch01	6933229	6936848	ID=SMEL_001g121930.1	Note=Protein of unknown function
SMEL3Ch01	6937420	6962397	ID=SMEL_001g121940.1	Note=Similar to ESP1: Separase (Arabidopsis thaliana OX%3D3702)
SMEL3Ch01	6964343	6967584	ID=SMEL_001g121950.1	Note=Protein of unknown function
SMEL3Ch01	6967751	6973600	ID=SMEL_001g121960.1	Note=Similar to PYM: Partner of Y14 and mago (Arabidopsis thaliana OX%3D3702)
SMEL3Ch01	7011758	7014628	ID=SMEL_001g121970.1	Note=Similar to At1g65750: Putative ribonuclease H protein At1g65750 (Arabidopsis thaliana OX%3D3702)
SMEL3Ch01	7030123	7041131	ID=SMEL_001g121980.1	Note=Similar to UGT80B1: Sterol 3-beta-glucosyltransferase UGT80B1 (Arabidopsis thaliana OX%3D3702)
SMEL3Ch01	7043739	7045872	ID=SMEL_001g121990.1	Note=Similar to Basic blue protein (Cucumis sativus OX%3D3659)
SMEL3Ch01	7047846	7048421	ID=SMEL_001g122000.1	Note=Similar to Chemocyanin (Lilium longiflorum OX%3D4690)
SMEL3Ch01	7052579	7053543	ID=SMEL_001g122010.1	Note=Similar to RPP1B: 60S acidic ribosomal protein P1-2 (Arabidopsis thaliana OX%3D3702)
SMEL3Ch01	7062639	7071661	ID=SMEL_001g122020.1	Note=Protein of unknown function
SMEL3Ch01	7079423	7080427	ID=SMEL_001g122030.1	Note=Similar to RTE1: Protein REVERSION-TO-ETHYLENE SENSITIVITY1 (Arabidopsis thaliana OX%3D3702)
SMEL3Ch01	7105059	7109598	ID=SMEL_001g122040.1	Note=Similar to PAP4: Probable plastid-lipid-associated protein 4%2C chloroplastic (Arabidopsis thaliana OX%3D3702)
SMEL3Ch01	7111512	7115825	ID=SMEL_001g122050.1	Note=Protein of unknown function
SMEL3Ch01	7119644	7141812	ID=SMEL_001g122060.1	Note=Protein of unknown function
SMEL3Ch01	7142274	7144264	ID=SMEL_001g122070.1	Note=Similar to Pathogenesis-related thaumatin-like protein 3.5 (Cryptomeria japonica OX%3D3369)
SMEL3Ch01	7151181	7157102	ID=SMEL_001g122080.1	Note=Similar to RER1: Protein RETICULATA-RELATED 1%2C chloroplastic (Arabidopsis thaliana OX%3D3702)
SMEL3Ch01	7159222	7164929	ID=SMEL_001g122090.1	Note=Similar to RBL10: RHOMBOID-like protein 10%2C chloroplastic (Arabidopsis thaliana OX%3D3702)
SMEL3Ch01	7166721	7172489	ID=SMEL_001g122100.1	Note=Protein of unknown function
SMEL3Ch01	7335775	7344826	ID=SMEL_001g122110.1	Note=Similar to TRN1: Transportin-1 (Arabidopsis thaliana OX%3D3702)
SMEL3Ch01	7345835	7351161	ID=SMEL_001g122120.1	Note=Similar to At1g60990: Putative transferase At1g60990%2C chloroplastic (Arabidopsis thaliana OX%3D3702)
SMEL3Ch01	7353036	7354964	ID=SMEL_001g122130.1	Note=Similar to At1g11050: Probable receptor-like protein kinase At1g11050 (Arabidopsis thaliana OX%3D3702)
SMEL3Ch01	7357712	7383620	ID=SMEL_001g122140.1	Note=Similar to UGGT: UDP-glucose:glycoprotein glucosyltransferase (Arabidopsis thaliana OX%3D3702)
SMEL3Ch01	7387880	7400271	ID=SMEL_001g122150.1	Note=Similar to AKT2: Potassium channel AKT2/3 (Arabidopsis thaliana OX%3D3702)
SMEL3Ch01	7401122	7401607	ID=SMEL_001g122160.1	Note=Similar to ATS3A: Embryo-specific protein ATS3A (Arabidopsis thaliana OX%3D3702)
SMEL3Ch01	7407281	7407778	ID=SMEL_001g122170.1	Note=Similar to ATS3A: Embryo-specific protein ATS3A (Arabidopsis thaliana OX%3D3702)
SMEL3Ch01	7422064	7423232	ID=SMEL_001g122180.1	Note=Protein of unknown function
SMEL3Ch01	7427548	7433552	ID=SMEL_001g122190.1	Note=Similar to SHM6: Serine hydroxymethyltransferase 6 (Arabidopsis thaliana OX%3D3702)
SMEL3Ch01	7447536	7454399	ID=SMEL_001g122200.1	Note=Protein of unknown function
SMEL3Ch01	7454989	7465941	ID=SMEL_001g122210.1	Note=Protein of unknown function
SMEL3Ch01	7489264	7489674	ID=SMEL_001g122220.1	Note=Protein of unknown function
SMEL3Ch01	7490318	7503542	ID=SMEL_001g122230.1	Note=Similar to RECQL4A: ATP-dependent DNA helicase Q-like 4A (Arabidopsis thaliana OX%3D3702)
SMEL3Ch01	7507301	7517562	ID=SMEL_001g122240.1	Note=Similar to TH1: Thiamine biosynthetic bifunctional enzyme TH1%2C chloroplastic (Arabidopsis thaliana OX%3D3702)
SMEL3Ch01	7519178	7523166	ID=SMEL_001g122250.1	Note=Similar to SRK2B: Serine/threonine-protein kinase SRK2B (Arabidopsis thaliana OX%3D3702)
SMEL3Ch01	7531111	7539513	ID=SMEL_001g122260.1	Note=Similar to TMN1: Transmembrane 9 superfamily member 1 (Arabidopsis thaliana OX%3D3702)
SMEL3Ch01	7540653	7541087	ID=SMEL_001g122270.1	Note=Similar to AP1: Ferredoxin%2C chloroplastic (Capsicum annuum OX%3D4072)
SMEL3Ch01	7541610	7542669	ID=SMEL_001g122280.1	Note=Similar to At1g50870: Putative F-box protein At1g50870 (Arabidopsis thaliana OX%3D3702)
SMEL3Ch01	7545586	7550455	ID=SMEL_001g122290.1	Note=Similar to PLDDELTA: Phospholipase D delta (Arabidopsis thaliana OX%3D3702)
SMEL3Ch01	7555673	7561215	ID=SMEL_001g122300.1	Note=Similar to MRS2-4: Magnesium transporter MRS2-4 (Arabidopsis thaliana OX%3D3702)
SMEL3Ch01	7562538	7568728	ID=SMEL_001g122310.1	Note=Similar to At4g06598: Uncharacterized protein At4g06598 (Arabidopsis thaliana OX%3D3702)
SMEL3Ch01	7569087	7569523	ID=SMEL_001g122320.1	Note=Similar to AGL103: Agamous-like MADS-box protein AGL103 (Arabidopsis thaliana OX%3D3702)
SMEL3Ch01	7571384	7574009	ID=SMEL_001g122330.1	Note=Similar to COBL6: COBRA-like protein 6 (Arabidopsis thaliana OX%3D3702)
SMEL3Ch01	7575206	7582155	ID=SMEL_001g122340.1	Note=Similar to At4g06599: Ubiquitin-like domain-containing CTD phosphatase (Arabidopsis thaliana OX%3D3702)
SMEL3Ch01	7592395	7592793	ID=SMEL_001g122350.1	Note=Protein of unknown function
SMEL3Ch01	7593890	7594784	ID=SMEL_001g122360.1	Note=Similar to ZHD4: Zinc-finger homeodomain protein 4 (Arabidopsis thaliana OX%3D3702)
SMEL3Ch01	7613657	7613968	ID=SMEL_001g122370.1	Note=Similar to ZHD1: Zinc-finger homeodomain protein 2 (Arabidopsis thaliana OX%3D3702)
SMEL3Ch01	7615282	7617512	ID=SMEL_001g122380.1	Note=Similar to RPS12: 40S ribosomal protein S12 (Hordeum vulgare OX%3D4513)
SMEL3Ch01	7619041	7620102	ID=SMEL_001g122390.1	Note=Similar to At5g23170: Serine/threonine-protein kinase-like protein At5g23170 (Arabidopsis thaliana OX%3D3702)
SMEL3Ch01	7646663	7649647	ID=SMEL_001g122400.1	Note=Similar to TCP8: Transcription factor TCP8 (Arabidopsis thaliana OX%3D3702)
SMEL3Ch01	7657139	7658780	ID=SMEL_001g122410.1	Note=Protein of unknown function
SMEL3Ch01	7659112	7664923	ID=SMEL_001g122420.1	Note=Similar to At1g71900: Probable magnesium transporter NIPA4 (Arabidopsis thaliana OX%3D3702)
SMEL3Ch01	7666840	7667022	ID=SMEL_001g122430.1	Note=Similar to ATPA: ATP synthase subunit alpha%2C mitochondrial (Helianthus annuus OX%3D4232)
SMEL3Ch01	7670402	7675423	ID=SMEL_001g122440.1	Note=Similar to HISN1B: ATP phosphoribosyltransferase 2%2C chloroplastic (Arabidopsis thaliana OX%3D3702)
SMEL3Ch01	7676834	7685873	ID=SMEL_001g122450.1	Note=Similar to BOP1: Ribosome biogenesis protein BOP1 homolog (Arabidopsis thaliana OX%3D3702)
SMEL3Ch01	7686437	7689653	ID=SMEL_001g122460.1	Note=Similar to NIFU2: NifU-like protein 2%2C chloroplastic (Arabidopsis thaliana OX%3D3702)
SMEL3Ch01	7691743	7693074	ID=SMEL_001g122470.1	Note=Protein of unknown function
SMEL3Ch01	7698977	7732842	ID=SMEL_001g122480.1	Note=Similar to At1g58060: DExH-box ATP-dependent RNA helicase DExH7%2C chloroplastic (Arabidopsis thaliana OX%3D3702)
SMEL3Ch01	7738236	7743493	ID=SMEL_001g122490.1	Note=Similar to At5g49945: Uncharacterized protein At5g49945 (Arabidopsis thaliana OX%3D3702)
SMEL3Ch01	7743833	7754070	ID=SMEL_001g122500.1	Note=Similar to EMB8: Embryogenesis-associated protein EMB8 (Picea glauca OX%3D3330)
SMEL3Ch01	7755770	7763894	ID=SMEL_001g122510.1	Note=Similar to EMB8: Embryogenesis-associated protein EMB8 (Picea glauca OX%3D3330)
SMEL3Ch01	7764903	7771296	ID=SMEL_001g122520.1	Note=Similar to EMB8: Embryogenesis-associated protein EMB8 (Picea glauca OX%3D3330)
SMEL3Ch01	7772446	7773651	ID=SMEL_001g122530.1	Note=Similar to WTF9: Protein WHAT'S THIS FACTOR 9%2C mitochondrial (Arabidopsis thaliana OX%3D3702)
SMEL3Ch01	7773757	7774026	ID=SMEL_001g122540.1	Note=Protein of unknown function
SMEL3Ch01	7774900	7775961	ID=SMEL_001g122550.1	Note=Similar to At3g17710: F-box protein At3g17710 (Arabidopsis thaliana OX%3D3702)
SMEL3Ch01	7778233	7779249	ID=SMEL_001g122560.1	Note=Protein of unknown function
SMEL3Ch01	7788620	7789968	ID=SMEL_001g122570.1	Note=Protein of unknown function
SMEL3Ch01	7802187	7805910	ID=SMEL_001g122580.1	Note=Similar to BASS1: Probable sodium/metabolite cotransporter BASS1%2C chloroplastic (Arabidopsis thaliana OX%3D3702)
SMEL3Ch01	7806540	7806876	ID=SMEL_001g122590.1	Note=Protein of unknown function
SMEL3Ch01	7810794	7811720	ID=SMEL_001g122600.1	Note=Similar to AGL82: Agamous-like MADS-box protein AGL82 (Arabidopsis thaliana OX%3D3702)
SMEL3Ch01	7815774	7817031	ID=SMEL_001g122610.1	Note=Protein of unknown function
SMEL3Ch01	7831664	7832596	ID=SMEL_001g122620.1	Note=Similar to AGL82: Agamous-like MADS-box protein AGL82 (Arabidopsis thaliana OX%3D3702)
SMEL3Ch01	7840062	7840766	ID=SMEL_001g122630.1	Note=Similar to DMP5: Protein DMP5 (Arabidopsis thaliana OX%3D3702)
SMEL3Ch01	7843687	7852249	ID=SMEL_001g122640.1	Note=Similar to GTE7: Transcription factor GTE7 (Arabidopsis thaliana OX%3D3702)
SMEL3Ch01	7852947	7862286	ID=SMEL_001g122650.1	Note=Protein of unknown function
SMEL3Ch01	7867183	7868145	ID=SMEL_001g122660.1	Note=Similar to AGL82: Agamous-like MADS-box protein AGL82 (Arabidopsis thaliana OX%3D3702)
SMEL3Ch01	7868562	7874979	ID=SMEL_001g122670.1	Note=Similar to ECT2: YTH domain-containing protein ECT2 (Arabidopsis thaliana OX%3D3702)
SMEL3Ch01	7877168	7881825	ID=SMEL_001g122680.1	Note=Similar to BAM1: Leucine-rich repeat receptor-like serine/threonine-protein kinase BAM1 (Arabidopsis thaliana OX%3D3702)
SMEL3Ch01	7902640	7904851	ID=SMEL_001g122690.1	Note=Similar to RPL3: 60S ribosomal protein L3 (Oryza sativa subsp. japonica OX%3D39947)
SMEL3Ch01	7907519	7908760	ID=SMEL_001g122700.1	Note=Protein of unknown function
SMEL3Ch01	7909059	7917087	ID=SMEL_001g122710.1	Note=Similar to At4g24290: MACPF domain-containing protein At4g24290 (Arabidopsis thaliana OX%3D3702)
SMEL3Ch01	7921694	7929045	ID=SMEL_001g122720.1	Note=Similar to At5g05010: Coatomer subunit delta (Arabidopsis thaliana OX%3D3702)
SMEL3Ch01	7930445	7931617	ID=SMEL_001g122730.1	Note=Protein of unknown function
SMEL3Ch01	7933275	7933916	ID=SMEL_001g122740.1	Note=Similar to WEX: Werner Syndrome-like exonuclease (Arabidopsis thaliana OX%3D3702)
SMEL3Ch01	7936282	7938120	ID=SMEL_001g122750.1	Note=Protein of unknown function
SMEL3Ch01	7938752	7943779	ID=SMEL_001g122760.1	Note=Similar to HSP70: Stromal 70 kDa heat shock-related protein%2C chloroplastic (Pisum sativum OX%3D3888)
SMEL3Ch01	7944890	7949273	ID=SMEL_001g122770.1	Note=Similar to PUR2: Phosphoribosylamine--glycine ligase%2C chloroplastic (Arabidopsis thaliana OX%3D3702)
SMEL3Ch01	7945616	7945897	ID=SMEL_001g122780.1	Note=Protein of unknown function
SMEL3Ch01	7951024	7961896	ID=SMEL_001g122790.1	Note=Similar to ASK10: Shaggy-related protein kinase kappa (Arabidopsis thaliana OX%3D3702)
SMEL3Ch01	7967537	7967656	ID=SMEL_001g122800.1	Note=Protein of unknown function
SMEL3Ch01	7967757	7973402	ID=SMEL_001g122810.1	Note=Similar to UPF3: Regulator of nonsense transcripts UPF3 (Arabidopsis thaliana OX%3D3702)
SMEL3Ch01	8016522	8020046	ID=SMEL_001g122820.1	Note=Similar to ITN1: Ankyrin repeat-containing protein ITN1 (Arabidopsis thaliana OX%3D3702)
SMEL3Ch01	8042561	8054765	ID=SMEL_001g122830.1	Note=Similar to At1g09660/At1g09670: KH domain-containing protein At1g09660/At1g09670 (Arabidopsis thaliana OX%3D3702)
SMEL3Ch01	8056681	8061315	ID=SMEL_001g122840.1	Note=Protein of unknown function
SMEL3Ch01	8060921	8064065	ID=SMEL_001g122850.1	Note=Similar to OPR2: 12-oxophytodienoate reductase-like protein (Solanum lycopersicum OX%3D4081)
SMEL3Ch01	8066271	8068309	ID=SMEL_001g122860.1	Note=Similar to OPR2: 12-oxophytodienoate reductase-like protein (Solanum lycopersicum OX%3D4081)
SMEL3Ch01	8069334	8072881	ID=SMEL_001g122870.1	Note=Similar to RABA2A: Ras-related protein RABA2a (Arabidopsis thaliana OX%3D3702)
SMEL3Ch01	8073156	8078460	ID=SMEL_001g122880.1	Note=Similar to RABD1: Ras-related protein RABD1 (Arabidopsis thaliana OX%3D3702)
SMEL3Ch01	8083012	8092033	ID=SMEL_001g122890.1	Note=Similar to At1g09600: Probable serine/threonine-protein kinase At1g09600 (Arabidopsis thaliana OX%3D3702)
SMEL3Ch01	8098222	8105652	ID=SMEL_001g122900.1	Note=Protein of unknown function
SMEL3Ch01	8120689	8124829	ID=SMEL_001g122910.1	Note=Similar to At5g08430: Uncharacterized protein At5g08430 (Arabidopsis thaliana OX%3D3702)
SMEL3Ch01	8134518	8137493	ID=SMEL_001g122920.1	Note=Similar to At3g51120: Zinc finger CCCH domain-containing protein 44 (Arabidopsis thaliana OX%3D3702)
SMEL3Ch01	8148024	8162839	ID=SMEL_001g122930.1	Note=Protein of unknown function
SMEL3Ch01	8167161	8171107	ID=SMEL_001g122940.1	Note=Similar to Cytochrome c (Solanum tuberosum OX%3D4113)
SMEL3Ch01	8175007	8176197	ID=SMEL_001g122950.1	Note=Protein of unknown function
SMEL3Ch01	8180765	8181343	ID=SMEL_001g122960.1	Note=Protein of unknown function
SMEL3Ch01	8184849	8190519	ID=SMEL_001g122970.1	Note=Similar to FRS11: Protein FAR1-RELATED SEQUENCE 11 (Arabidopsis thaliana OX%3D3702)
SMEL3Ch01	8209423	8220381	ID=SMEL_001g122980.1	Note=Protein of unknown function
SMEL3Ch01	8221516	8225638	ID=SMEL_001g122990.1	Note=Similar to GRP23: Pentatricopeptide repeat-containing protein At1g10270 (Arabidopsis thaliana OX%3D3702)
SMEL3Ch01	8225863	8226174	ID=SMEL_001g123000.1	Note=Protein of unknown function
SMEL3Ch01	8226449	8233325	ID=SMEL_001g123010.1	Note=Similar to BC10: Glycosyltransferase BC10 (Oryza sativa subsp. japonica OX%3D39947)
SMEL3Ch01	8245077	8253399	ID=SMEL_001g123020.1	Note=Similar to CLC-C: Chloride channel protein CLC-c (Arabidopsis thaliana OX%3D3702)
SMEL3Ch01	8254546	8269567	ID=SMEL_001g123030.1	Note=Similar to DRP2B: Dynamin-2B (Arabidopsis thaliana OX%3D3702)
SMEL3Ch01	8270044	8281695	ID=SMEL_001g123040.1	Note=Similar to At1g10310: NADPH-dependent pterin aldehyde reductase (Arabidopsis thaliana OX%3D3702)
SMEL3Ch01	8292513	8296911	ID=SMEL_001g123050.1	Note=Similar to At1g10320: Zinc finger CCCH domain-containing protein 5 (Arabidopsis thaliana OX%3D3702)
SMEL3Ch01	8303627	8317529	ID=SMEL_001g123060.1	Note=Similar to MTR4: DExH-box ATP-dependent RNA helicase DExH9 (Arabidopsis thaliana OX%3D3702)
SMEL3Ch01	8317706	8318255	ID=SMEL_001g123070.1	Note=Protein of unknown function
SMEL3Ch01	8319391	8319941	ID=SMEL_001g123080.1	Note=Similar to VAS: Lipid transfer-like protein VAS (Arabidopsis thaliana OX%3D3702)
SMEL3Ch01	8324684	8331536	ID=SMEL_001g123090.1	Note=Similar to ARF1: Auxin response factor 1 (Arabidopsis thaliana OX%3D3702)
SMEL3Ch01	8346441	8363141	ID=SMEL_001g123100.1	Note=Similar to MAD1: Mitotic spindle checkpoint protein MAD1 (Arabidopsis thaliana OX%3D3702)
SMEL3Ch01	8378888	8384338	ID=SMEL_001g123110.1	Note=Similar to NPF4.3: Protein NRT1/ PTR FAMILY 4.3 (Arabidopsis thaliana OX%3D3702)
SMEL3Ch01	8386944	8395001	ID=SMEL_001g123120.1	Note=Protein of unknown function
SMEL3Ch01	8400494	8426663	ID=SMEL_001g123130.1	Note=Similar to CAND1: Cullin-associated NEDD8-dissociated protein 1 (Arabidopsis thaliana OX%3D3702)
SMEL3Ch01	8431517	8441448	ID=SMEL_001g123140.1	Note=Similar to CLPX2: CLP protease regulatory subunit CLPX2%2C mitochondrial (Arabidopsis thaliana OX%3D3702)
SMEL3Ch01	8444933	8447121	ID=SMEL_001g123150.1	Note=Similar to ZHD4: Zinc-finger homeodomain protein 4 (Arabidopsis thaliana OX%3D3702)
SMEL3Ch01	8463314	8479931	ID=SMEL_001g123160.1	Note=Similar to 28 kDa ribonucleoprotein%2C chloroplastic (Spinacia oleracea OX%3D3562)
SMEL3Ch01	8482142	8482729	ID=SMEL_001g123170.1	Note=Similar to HSP22.7: 22.7 kDa class IV heat shock protein (Pisum sativum OX%3D3888)
SMEL3Ch01	8483522	8491422	ID=SMEL_001g123180.1	Note=Protein of unknown function
SMEL3Ch01	8493126	8501731	ID=SMEL_001g123190.1	Note=Similar to MMT1: Methionine S-methyltransferase (Wedelia biflora OX%3D101473)
SMEL3Ch01	8506265	8520995	ID=SMEL_001g123200.1	Note=Similar to N: TMV resistance protein N (Nicotiana glutinosa OX%3D35889)
SMEL3Ch01	8522791	8522994	ID=SMEL_001g123210.1	Note=Similar to rpl23-A: 50S ribosomal protein L23%2C chloroplastic (Nicotiana sylvestris OX%3D4096)
SMEL3Ch01	8527307	8528123	ID=SMEL_001g123220.1	Note=Similar to At5g39150: Germin-like protein subfamily 1 member 17 (Arabidopsis thaliana OX%3D3702)
SMEL3Ch01	8532534	8533366	ID=SMEL_001g123230.1	Note=Similar to GLP2A: Germin-like protein subfamily 1 member 18 (Arabidopsis thaliana OX%3D3702)
SMEL3Ch01	8539462	8539716	ID=SMEL_001g123240.1	Note=Similar to At3g05950: Germin-like protein subfamily 1 member 7 (Arabidopsis thaliana OX%3D3702)
SMEL3Ch01	8551494	8552519	ID=SMEL_001g123250.1	Note=Similar to GLP6: Germin-like protein subfamily 1 member 13 (Arabidopsis thaliana OX%3D3702)
SMEL3Ch01	8577539	8578563	ID=SMEL_001g123260.1	Note=Similar to GLP6: Germin-like protein subfamily 1 member 13 (Arabidopsis thaliana OX%3D3702)
SMEL3Ch01	8592859	8593907	ID=SMEL_001g123270.1	Note=Similar to GLP2A: Germin-like protein subfamily 1 member 18 (Arabidopsis thaliana OX%3D3702)
SMEL3Ch01	8609266	8612842	ID=SMEL_001g123280.1	Note=Similar to At5g39150: Germin-like protein subfamily 1 member 17 (Arabidopsis thaliana OX%3D3702)
SMEL3Ch01	8620205	8621032	ID=SMEL_001g123290.1	Note=Similar to GLP2A: Germin-like protein subfamily 1 member 18 (Arabidopsis thaliana OX%3D3702)
SMEL3Ch01	8622874	8628197	ID=SMEL_001g123300.1	Note=Similar to N: TMV resistance protein N (Nicotiana glutinosa OX%3D35889)
SMEL3Ch01	8631681	8642450	ID=SMEL_001g123310.1	Note=Similar to N: TMV resistance protein N (Nicotiana glutinosa OX%3D35889)
SMEL3Ch01	8657399	8662823	ID=SMEL_001g123320.1	Note=Similar to N: TMV resistance protein N (Nicotiana glutinosa OX%3D35889)
SMEL3Ch01	8703351	8706556	ID=SMEL_001g123330.1	Note=Similar to N: TMV resistance protein N (Nicotiana glutinosa OX%3D35889)
SMEL3Ch01	8706561	8708001	ID=SMEL_001g123340.1	Note=Similar to RPP2A: Disease resistance protein RPP2A (Arabidopsis thaliana OX%3D3702)
SMEL3Ch01	8708058	8709341	ID=SMEL_001g123350.1	Note=Protein of unknown function
SMEL3Ch01	8709611	8710369	ID=SMEL_001g123360.1	Note=Protein of unknown function
SMEL3Ch01	8711058	8715656	ID=SMEL_001g123370.1	Note=Similar to N: TMV resistance protein N (Nicotiana glutinosa OX%3D35889)
SMEL3Ch01	8717338	8723521	ID=SMEL_001g123380.1	Note=Similar to N: TMV resistance protein N (Nicotiana glutinosa OX%3D35889)
SMEL3Ch01	8724214	8727305	ID=SMEL_001g123390.1	Note=Similar to At1g14450: NADH dehydrogenase [ubiquinone] 1 beta subcomplex subunit 3-B (Arabidopsis thaliana OX%3D3702)
SMEL3Ch01	8777519	8783314	ID=SMEL_001g123400.1	Note=Similar to ISPD: 2-C-methyl-D-erythritol 4-phosphate cytidylyltransferase%2C chloroplastic (Arabidopsis thaliana OX%3D3702)
SMEL3Ch01	8783495	8790197	ID=SMEL_001g123410.1	Note=Similar to STI: Protein STICHEL (Arabidopsis thaliana OX%3D3702)
SMEL3Ch01	8796586	8807167	ID=SMEL_001g123420.1	Note=Similar to At3g02760: Histidine--tRNA ligase%2C cytoplasmic (Arabidopsis thaliana OX%3D3702)
SMEL3Ch01	8808554	8810830	ID=SMEL_001g123430.1	Note=Similar to PCMP-A4: Pentatricopeptide repeat-containing protein At1g14470 (Arabidopsis thaliana OX%3D3702)
SMEL3Ch01	8811351	8827464	ID=SMEL_001g123440.1	Note=Similar to ALFIN-1: PHD finger protein Alfin1 (Medicago sativa OX%3D3879)
SMEL3Ch01	8834462	8836522	ID=SMEL_001g123450.1	Note=Similar to NAC035: NAC domain-containing protein 35 (Arabidopsis thaliana OX%3D3702)
SMEL3Ch01	8846703	8848297	ID=SMEL_001g123460.1	Note=Protein of unknown function
SMEL3Ch01	8856403	8860316	ID=SMEL_001g123470.1	Note=Similar to CCR1: Cinnamoyl-CoA reductase 1 (Arabidopsis thaliana OX%3D3702)
SMEL3Ch01	8862619	8863945	ID=SMEL_001g123480.1	Note=Protein of unknown function
SMEL3Ch01	8865040	8873127	ID=SMEL_001g123490.1	Note=Similar to At5g49770: Probable leucine-rich repeat receptor-like protein kinase At5g49770 (Arabidopsis thaliana OX%3D3702)
SMEL3Ch01	8885623	8900811	ID=SMEL_001g123500.1	Note=Similar to At5g49770: Probable leucine-rich repeat receptor-like protein kinase At5g49770 (Arabidopsis thaliana OX%3D3702)
SMEL3Ch01	8908667	8918321	ID=SMEL_001g123510.1	Note=Similar to PCMP-H79: Pentatricopeptide repeat-containing protein At3g49710 (Arabidopsis thaliana OX%3D3702)
SMEL3Ch01	8926585	8928531	ID=SMEL_001g123520.1	Note=Similar to At5g49770: Probable leucine-rich repeat receptor-like protein kinase At5g49770 (Arabidopsis thaliana OX%3D3702)
SMEL3Ch01	8930350	8932679	ID=SMEL_001g123530.1	Note=Protein of unknown function
SMEL3Ch01	8933335	8938599	ID=SMEL_001g123540.1	Note=Similar to Glutathione S-transferase zeta class (Euphorbia esula OX%3D3993)
SMEL3Ch01	8940051	8941119	ID=SMEL_001g123550.1	Note=Protein of unknown function
SMEL3Ch01	8941361	8946723	ID=SMEL_001g123560.1	Note=Similar to Glutathione S-transferase zeta class (Euphorbia esula OX%3D3993)
SMEL3Ch01	8948091	8949159	ID=SMEL_001g123570.1	Note=Protein of unknown function
SMEL3Ch01	8957883	8968027	ID=SMEL_001g123580.1	Note=Similar to ZW10: Centromere/kinetochore protein zw10 homolog (Arabidopsis thaliana OX%3D3702)
SMEL3Ch01	8979005	8983362	ID=SMEL_001g123590.1	Note=Similar to FRO6: Ferric reduction oxidase 6 (Arabidopsis thaliana OX%3D3702)
SMEL3Ch01	8989159	8995726	ID=SMEL_001g123600.1	Note=Similar to TIF3C1: Eukaryotic translation initiation factor 3 subunit C (Medicago truncatula OX%3D3880)
SMEL3Ch01	8992754	8992969	ID=SMEL_001g123610.1	Note=Protein of unknown function
SMEL3Ch01	8999555	9003458	ID=SMEL_001g123620.1	Note=Similar to KOR: Endoglucanase 25 (Arabidopsis thaliana OX%3D3702)
SMEL3Ch01	9005869	9007505	ID=SMEL_001g123630.1	Note=Similar to NUP160: Nuclear pore complex protein NUP160 (Arabidopsis thaliana OX%3D3702)
SMEL3Ch01	9012642	9031153	ID=SMEL_001g123640.1	Note=Similar to NUP160: Nuclear pore complex protein NUP160 (Arabidopsis thaliana OX%3D3702)
SMEL3Ch01	9037361	9040323	ID=SMEL_001g123650.1	Note=Protein of unknown function
SMEL3Ch01	9040517	9043628	ID=SMEL_001g123660.1	Note=Similar to MLO13: MLO-like protein 13 (Arabidopsis thaliana OX%3D3702)
SMEL3Ch01	9049162	9064924	ID=SMEL_001g123670.1	Note=Protein of unknown function
SMEL3Ch01	9066777	9071188	ID=SMEL_001g123680.1	Note=Protein of unknown function
SMEL3Ch01	9073148	9083297	ID=SMEL_001g123690.1	Note=Similar to MFDR: NADPH:adrenodoxin oxidoreductase%2C mitochondrial (Arabidopsis thaliana OX%3D3702)
SMEL3Ch01	9085341	9086303	ID=SMEL_001g123700.1	Note=Similar to At4g38150: Pentatricopeptide repeat-containing protein At4g38150 (Arabidopsis thaliana OX%3D3702)
SMEL3Ch01	9088765	9097564	ID=SMEL_001g123710.1	Note=Similar to At1g77220: Protein LAZ1 homolog 1 (Arabidopsis thaliana OX%3D3702)
SMEL3Ch01	9109653	9110029	ID=SMEL_001g123720.1	Note=Protein of unknown function
SMEL3Ch01	9113283	9113609	ID=SMEL_001g123730.1	Note=Protein of unknown function
SMEL3Ch01	9120944	9122502	ID=SMEL_001g123740.1	Note=Protein of unknown function
SMEL3Ch01	9126969	9134826	ID=SMEL_001g123750.1	Note=Similar to At5g26710: Glutamate--tRNA ligase%2C cytoplasmic (Arabidopsis thaliana OX%3D3702)
SMEL3Ch01	9136870	9140984	ID=SMEL_001g123760.1	Note=Similar to NECI: Nectarin-1 (Nicotiana langsdorffii x Nicotiana sanderae OX%3D164110)
SMEL3Ch01	9144704	9147044	ID=SMEL_001g123770.1	Note=Similar to NECI: Nectarin-1 (Nicotiana langsdorffii x Nicotiana sanderae OX%3D164110)
SMEL3Ch01	9155325	9162724	ID=SMEL_001g123780.1	Note=Similar to FEN1: Flap endonuclease 1 (Glycine max OX%3D3847)
SMEL3Ch01	9167238	9170034	ID=SMEL_001g123790.1	Note=Similar to NPF4.3: Protein NRT1/ PTR FAMILY 4.3 (Arabidopsis thaliana OX%3D3702)
SMEL3Ch01	9184847	9189804	ID=SMEL_001g123800.1	Note=Similar to PAE12: Pectin acetylesterase 12 (Arabidopsis thaliana OX%3D3702)
SMEL3Ch01	9200647	9202621	ID=SMEL_001g123810.1	Note=Similar to MYB61: Transcription factor MYB61 (Arabidopsis thaliana OX%3D3702)
SMEL3Ch01	9228222	9229274	ID=SMEL_001g123820.1	Note=Protein of unknown function
SMEL3Ch01	9230780	9232504	ID=SMEL_001g123830.1	Note=Similar to At4g34215: Probable carbohydrate esterase At4g34215 (Arabidopsis thaliana OX%3D3702)
SMEL3Ch01	9233427	9234555	ID=SMEL_001g123840.1	Note=Protein of unknown function
SMEL3Ch01	9237978	9241884	ID=SMEL_001g123850.1	Note=Protein of unknown function
SMEL3Ch01	9242300	9247379	ID=SMEL_001g123860.1	Note=Similar to PIF3: Transcription factor PIF3 (Arabidopsis thaliana OX%3D3702)
SMEL3Ch01	9271681	9272641	ID=SMEL_001g123870.1	Note=Similar to LTI6A: Hydrophobic protein LTI6A (Oryza sativa subsp. japonica OX%3D39947)
SMEL3Ch01	9472346	9476726	ID=SMEL_001g123880.1	Note=Similar to PVS1: Vetispiradiene synthase 1 (Solanum tuberosum OX%3D4113)
SMEL3Ch01	9494151	9500242	ID=SMEL_001g123890.1	Note=Similar to APA1: Aspartic proteinase A1 (Arabidopsis thaliana OX%3D3702)
SMEL3Ch01	9500956	9505486	ID=SMEL_001g123900.1	Note=Similar to STIPL2: Septin and tuftelin-interacting protein 1 homolog 2 (Arabidopsis thaliana OX%3D3702)
SMEL3Ch01	9510944	9511165	ID=SMEL_001g123910.1	Note=Protein of unknown function
SMEL3Ch01	9525890	9526609	ID=SMEL_001g123920.1	Note=Similar to AGL80: Agamous-like MADS-box protein AGL80 (Arabidopsis thaliana OX%3D3702)
SMEL3Ch01	9536474	9537306	ID=SMEL_001g123930.1	Note=Similar to GLP2A: Germin-like protein subfamily 1 member 18 (Arabidopsis thaliana OX%3D3702)
SMEL3Ch01	9542750	9548591	ID=SMEL_001g123940.1	Note=Similar to Vetispiradiene synthase 1 (Hyoscyamus muticus OX%3D35626)
SMEL3Ch01	9549395	9550600	ID=SMEL_001g123950.1	Note=Protein of unknown function
SMEL3Ch01	9555014	9557221	ID=SMEL_001g123960.1	Note=Similar to At5g64320: Pentatricopeptide repeat-containing protein At5g64320%2C mitochondrial (Arabidopsis thaliana OX%3D3702)
SMEL3Ch01	9558076	9564596	ID=SMEL_001g123970.1	Note=Protein of unknown function
SMEL3Ch01	9579365	9582565	ID=SMEL_001g123980.1	Note=Similar to NEAP2: Nuclear envelope-associated protein 2 (Arabidopsis thaliana OX%3D3702)
SMEL3Ch01	9583680	9587707	ID=SMEL_001g123990.1	Note=Similar to At1g11820: Glucan endo-1%2C3-beta-glucosidase 1 (Arabidopsis thaliana OX%3D3702)
SMEL3Ch01	9594177	9601042	ID=SMEL_001g124000.1	Note=Similar to HASPIN: Serine/threonine-protein kinase haspin homolog (Arabidopsis thaliana OX%3D3702)
SMEL3Ch01	9612003	9616922	ID=SMEL_001g124010.1	Note=Similar to At2g42960: Probable receptor-like protein kinase At2g42960 (Arabidopsis thaliana OX%3D3702)
SMEL3Ch01	9618383	9626641	ID=SMEL_001g124020.1	Note=Protein of unknown function
SMEL3Ch01	9643530	9654940	ID=SMEL_001g124030.1	Note=Similar to PDR3: Pleiotropic drug resistance protein 3 (Nicotiana tabacum OX%3D4097)
SMEL3Ch01	9656061	9658692	ID=SMEL_001g124040.1	Note=Similar to METK1: S-adenosylmethionine synthase 1 (Solanum tuberosum OX%3D4113)
SMEL3Ch01	9670250	9671660	ID=SMEL_001g124050.1	Note=Similar to GSVIVT00037159001: Peroxidase 5 (Vitis vinifera OX%3D29760)
SMEL3Ch01	9675440	9679789	ID=SMEL_001g124060.1	Note=Similar to ACLA-2: ATP-citrate synthase alpha chain protein 2 (Oryza sativa subsp. japonica OX%3D39947)
SMEL3Ch01	9682119	9687234	ID=SMEL_001g124070.1	Note=Similar to SPT16: FACT complex subunit SPT16 (Zea mays OX%3D4577)
SMEL3Ch01	9688035	9691250	ID=SMEL_001g124080.1	Note=Similar to SPT16: FACT complex subunit SPT16 (Zea mays OX%3D4577)
SMEL3Ch01	9693864	9702624	ID=SMEL_001g124090.1	Note=Similar to At5g26760: Putative RNA polymerase II subunit B1 CTD phosphatase RPAP2 homolog (Arabidopsis thaliana OX%3D3702)
SMEL3Ch01	9710852	9717768	ID=SMEL_001g124100.1	Note=Similar to NTK-1: Shaggy-related protein kinase NtK-1 (Nicotiana tabacum OX%3D4097)
SMEL3Ch01	9720497	9723691	ID=SMEL_001g124110.1	Note=Similar to Os01g0252200: Zinc finger CCCH domain-containing protein 3 (Oryza sativa subsp. japonica OX%3D39947)
SMEL3Ch01	9727247	9729582	ID=SMEL_001g124120.1	Note=Similar to At1g48100: Polygalacturonase At1g48100 (Arabidopsis thaliana OX%3D3702)
SMEL3Ch01	9731152	9737374	ID=SMEL_001g124130.1	Note=Protein of unknown function
SMEL3Ch01	9742745	9751944	ID=SMEL_001g124140.1	Note=Similar to G6PD4: Inactive glucose-6-phosphate 1-dehydrogenase 4%2C chloroplastic (Arabidopsis thaliana OX%3D3702)
SMEL3Ch01	9757693	9758079	ID=SMEL_001g124150.1	Note=Protein of unknown function
SMEL3Ch01	9758687	9763342	ID=SMEL_001g124160.1	Note=Similar to At1g09390: GDSL esterase/lipase At1g09390 (Arabidopsis thaliana OX%3D3702)
SMEL3Ch01	9767416	9771888	ID=SMEL_001g124170.1	Note=Similar to At1g09380: WAT1-related protein At1g09380 (Arabidopsis thaliana OX%3D3702)
SMEL3Ch01	9781770	9797245	ID=SMEL_001g124180.1	Note=Similar to At1g09380: WAT1-related protein At1g09380 (Arabidopsis thaliana OX%3D3702)
SMEL3Ch01	9801451	9806288	ID=SMEL_001g124190.1	Note=Similar to At1g09380: WAT1-related protein At1g09380 (Arabidopsis thaliana OX%3D3702)
SMEL3Ch01	9814885	9819477	ID=SMEL_001g124200.1	Note=Similar to At1g09380: WAT1-related protein At1g09380 (Arabidopsis thaliana OX%3D3702)
SMEL3Ch01	9821134	9824914	ID=SMEL_001g124210.1	Note=Similar to ARF: ADP-ribosylation factor 2 (Oryza sativa subsp. japonica OX%3D39947)
SMEL3Ch01	9825829	9830680	ID=SMEL_001g124220.1	Note=Similar to ABCI20: ABC transporter I family member 20 (Arabidopsis thaliana OX%3D3702)
SMEL3Ch01	9831626	9837141	ID=SMEL_001g124230.1	Note=Protein of unknown function
SMEL3Ch01	9837335	9844302	ID=SMEL_001g124240.1	Note=Similar to GOLS1: Galactinol synthase 1 (Solanum lycopersicum OX%3D4081)
SMEL3Ch01	9877059	9883465	ID=SMEL_001g124250.1	Note=Similar to NLP8: Protein NLP8 (Arabidopsis thaliana OX%3D3702)
SMEL3Ch01	9884295	9890834	ID=SMEL_001g124260.1	Note=Similar to GOLS1: Galactinol synthase 1 (Solanum lycopersicum OX%3D4081)
SMEL3Ch01	9892590	9894753	ID=SMEL_001g124270.1	Note=Protein of unknown function
SMEL3Ch01	9895019	9898153	ID=SMEL_001g124280.1	Note=Similar to GOLS1: Galactinol synthase 1 (Solanum lycopersicum OX%3D4081)
SMEL3Ch01	9899715	9907319	ID=SMEL_001g124290.1	Note=Similar to AP3M: AP-3 complex subunit mu (Arabidopsis thaliana OX%3D3702)
SMEL3Ch01	9910371	9917854	ID=SMEL_001g124300.1	Note=Similar to INVA: Alkaline/neutral invertase A%2C mitochondrial (Arabidopsis thaliana OX%3D3702)
SMEL3Ch01	9918610	9920567	ID=SMEL_001g124310.1	Note=Similar to PCMP-E64: Putative pentatricopeptide repeat-containing protein At1g56570 (Arabidopsis thaliana OX%3D3702)
SMEL3Ch01	9922612	9924849	ID=SMEL_001g124320.1	Note=Similar to PCMP-H12: Pentatricopeptide repeat-containing protein At1g08070%2C chloroplastic (Arabidopsis thaliana OX%3D3702)
SMEL3Ch01	9926976	9933565	ID=SMEL_001g124330.1	Note=Similar to AGDP1: Protein AGENET DOMAIN (AGD)-CONTAINING P1 (Arabidopsis thaliana OX%3D3702)
SMEL3Ch01	9935448	9935984	ID=SMEL_001g124340.1	Note=Protein of unknown function
SMEL3Ch01	9939476	9940000	ID=SMEL_001g124350.1	Note=Protein of unknown function
SMEL3Ch01	9944848	9954279	ID=SMEL_001g124360.1	Note=Similar to ICP55: Intermediate cleaving peptidase 55%2C mitochondrial (Arabidopsis thaliana OX%3D3702)
SMEL3Ch01	9955384	9963374	ID=SMEL_001g124370.1	Note=Similar to STR6: Rhodanese-like domain-containing protein 6 (Arabidopsis thaliana OX%3D3702)
SMEL3Ch01	9968985	9981589	ID=SMEL_001g124380.1	Note=Similar to IMPA4: Importin subunit alpha-4 (Arabidopsis thaliana OX%3D3702)
SMEL3Ch01	9986970	9987314	ID=SMEL_001g124390.1	Note=Protein of unknown function
SMEL3Ch01	9996523	9999996	ID=SMEL_001g124400.1	Note=Protein of unknown function
SMEL3Ch01	10000280	10005110	ID=SMEL_001g124410.1	Note=Protein of unknown function
SMEL3Ch01	10033137	10033754	ID=SMEL_001g124420.1	Note=Similar to WEX: Werner Syndrome-like exonuclease (Arabidopsis thaliana OX%3D3702)
SMEL3Ch01	10037061	10037690	ID=SMEL_001g124430.1	Note=Similar to WEX: Werner Syndrome-like exonuclease (Arabidopsis thaliana OX%3D3702)
SMEL3Ch01	10053412	10055224	ID=SMEL_001g124440.1	Note=Similar to BHLH149: Transcription factor bHLH149 (Arabidopsis thaliana OX%3D3702)
SMEL3Ch01	10061130	10084802	ID=SMEL_001g124450.1	Note=Similar to SOQ1: Protein SUPPRESSOR OF QUENCHING 1%2C chloroplastic (Arabidopsis thaliana OX%3D3702)
SMEL3Ch01	10086444	10091545	ID=SMEL_001g124460.1	Note=Similar to HMGB11: Putative high mobility group B protein 11 (Arabidopsis thaliana OX%3D3702)
SMEL3Ch01	10093129	10101756	ID=SMEL_001g124470.1	Note=Similar to IREG3: Solute carrier family 40 member 3%2C chloroplastic (Arabidopsis thaliana OX%3D3702)
SMEL3Ch01	10111149	10116233	ID=SMEL_001g124480.1	Note=Similar to GPA3: Protein GLUTELIN PRECURSOR ACCUMULATION 3 (Oryza sativa subsp. japonica OX%3D39947)
SMEL3Ch01	10118528	10124890	ID=SMEL_001g124490.1	Note=Protein of unknown function
SMEL3Ch01	10124943	10127901	ID=SMEL_001g124500.1	Note=Similar to At1g60770: Pentatricopeptide repeat-containing protein At1g60770 (Arabidopsis thaliana OX%3D3702)
SMEL3Ch01	10132670	10136629	ID=SMEL_001g124510.1	Note=Similar to NOP5-1: Probable nucleolar protein 5-1 (Arabidopsis thaliana OX%3D3702)
SMEL3Ch01	10137001	10141578	ID=SMEL_001g124520.1	Note=Similar to N: TMV resistance protein N (Nicotiana glutinosa OX%3D35889)
SMEL3Ch01	10145091	10150633	ID=SMEL_001g124530.1	Note=Protein of unknown function
SMEL3Ch01	10155947	10176165	ID=SMEL_001g124540.1	Note=Similar to EXL3: GDSL esterase/lipase EXL3 (Arabidopsis thaliana OX%3D3702)
SMEL3Ch01	10178222	10185565	ID=SMEL_001g124550.1	Note=Similar to CLPP5: ATP-dependent Clp protease proteolytic subunit 5%2C chloroplastic (Arabidopsis thaliana OX%3D3702)
SMEL3Ch01	10191771	10198198	ID=SMEL_001g124560.1	Note=Similar to OSH6: Homeobox protein knotted-1-like 1 (Oryza sativa subsp. japonica OX%3D39947)
SMEL3Ch01	10204352	10208532	ID=SMEL_001g124570.1	Note=Protein of unknown function
SMEL3Ch01	10212474	10213427	ID=SMEL_001g124580.1	Note=Similar to CHLN: Nicotianamine synthase (Solanum lycopersicum OX%3D4081)
SMEL3Ch01	10225030	10227703	ID=SMEL_001g124590.1	Note=Protein of unknown function
SMEL3Ch01	10243464	10244706	ID=SMEL_001g124600.1	Note=Similar to BZIP53: bZIP transcription factor 53 (Arabidopsis thaliana OX%3D3702)
SMEL3Ch01	10248322	10254827	ID=SMEL_001g124610.1	Note=Protein of unknown function
SMEL3Ch01	10248404	10249819	ID=SMEL_001g124620.1	Note=Protein of unknown function
SMEL3Ch01	10255611	10256286	ID=SMEL_001g124630.1	Note=Protein of unknown function
SMEL3Ch01	10272950	10277029	ID=SMEL_001g124640.1	Note=Protein of unknown function
SMEL3Ch01	10279421	10281586	ID=SMEL_001g124650.1	Note=Similar to DIM1A: Ribosomal RNA small subunit methyltransferase (Arabidopsis thaliana OX%3D3702)
SMEL3Ch01	10283988	10289019	ID=SMEL_001g124660.1	Note=Similar to PRFB2: Peptide chain release factor PrfB2%2C chloroplastic (Arabidopsis thaliana OX%3D3702)
SMEL3Ch01	10289546	10298210	ID=SMEL_001g124670.1	Note=Similar to At5g03905: Iron-sulfur assembly protein IscA-like 2%2C mitochondrial (Arabidopsis thaliana OX%3D3702)
SMEL3Ch01	10300473	10303527	ID=SMEL_001g124680.1	Note=Similar to At1g56345: RNA pseudouridine synthase 1 (Arabidopsis thaliana OX%3D3702)
SMEL3Ch01	10308768	10312806	ID=SMEL_001g124690.1	Note=Similar to CAL1: Calreticulin (Nicotiana plumbaginifolia OX%3D4092)
SMEL3Ch01	10316464	10317499	ID=SMEL_001g124700.1	Note=Similar to At3g01520: Universal stress protein A-like protein (Arabidopsis thaliana OX%3D3702)
SMEL3Ch01	10323175	10337502	ID=SMEL_001g124710.1	Note=Similar to LPD2: Dihydrolipoyl dehydrogenase 2%2C chloroplastic (Arabidopsis thaliana OX%3D3702)
SMEL3Ch01	10338726	10341887	ID=SMEL_001g124720.1	Note=Similar to SAR1A: GTP-binding protein SAR1A (Arabidopsis thaliana OX%3D3702)
SMEL3Ch01	10343059	10354601	ID=SMEL_001g124730.1	Note=Similar to PCMP-E70: Pentatricopeptide repeat-containing protein At1g09190 (Arabidopsis thaliana OX%3D3702)
SMEL3Ch01	10368871	10375353	ID=SMEL_001g124740.1	Note=Similar to Probable protein disulfide-isomerase A6 (Medicago sativa OX%3D3879)
SMEL3Ch01	10380189	10381349	ID=SMEL_001g124750.1	Note=Protein of unknown function
SMEL3Ch01	10393591	10400845	ID=SMEL_001g124760.1	Note=Protein of unknown function
SMEL3Ch01	10407870	10415286	ID=SMEL_001g124770.1	Note=Similar to RECQL1: ATP-dependent DNA helicase Q-like 1 (Arabidopsis thaliana OX%3D3702)
SMEL3Ch01	10417446	10417817	ID=SMEL_001g124780.1	Note=Protein of unknown function
SMEL3Ch01	10418913	10440249	ID=SMEL_001g124790.1	Note=Similar to WEX: Werner Syndrome-like exonuclease (Arabidopsis thaliana OX%3D3702)
SMEL3Ch01	10444897	10452455	ID=SMEL_001g124800.1	Note=Protein of unknown function
SMEL3Ch01	10452698	10454218	ID=SMEL_001g124810.1	Note=Similar to TGD1: Protein TRIGALACTOSYLDIACYLGLYCEROL 1%2C chloroplastic (Arabidopsis thaliana OX%3D3702)
SMEL3Ch01	10464351	10468880	ID=SMEL_001g124820.1	Note=Similar to CBP60D: Calmodulin-binding protein 60 D (Arabidopsis thaliana OX%3D3702)
SMEL3Ch01	10469742	10471242	ID=SMEL_001g124830.1	Note=Similar to rpoC2: DNA-directed RNA polymerase subunit beta'' (Solanum tuberosum OX%3D4113)
SMEL3Ch01	10473211	10475107	ID=SMEL_001g124840.1	Note=Similar to ATJ6: Chaperone protein dnaJ 6 (Arabidopsis thaliana OX%3D3702)
SMEL3Ch01	10480904	10481546	ID=SMEL_001g124850.1	Note=Similar to Proteasome subunit beta type-6 (Nicotiana tabacum OX%3D4097)
SMEL3Ch01	10484023	10484841	ID=SMEL_001g124860.1	Note=Similar to GATA15: GATA transcription factor 15 (Arabidopsis thaliana OX%3D3702)
SMEL3Ch01	10488147	10490752	ID=SMEL_001g124870.1	Note=Similar to GATL7: Probable galacturonosyltransferase-like 7 (Arabidopsis thaliana OX%3D3702)
SMEL3Ch01	10494460	10496430	ID=SMEL_001g124880.1	Note=Similar to SCL33: Scarecrow-like protein 33 (Arabidopsis thaliana OX%3D3702)
SMEL3Ch01	10499168	10503806	ID=SMEL_001g124890.1	Note=Similar to SCL33: Scarecrow-like protein 33 (Arabidopsis thaliana OX%3D3702)
SMEL3Ch01	10504382	10513888	ID=SMEL_001g124900.1	Note=Protein of unknown function
SMEL3Ch01	10515990	10521508	ID=SMEL_001g124910.1	Note=Similar to DPD1: Exonuclease DPD1%2C chloroplastic/mitochondrial (Arabidopsis thaliana OX%3D3702)
SMEL3Ch01	10523100	10528130	ID=SMEL_001g124920.1	Note=Similar to SYP43: Syntaxin-43 (Arabidopsis thaliana OX%3D3702)
SMEL3Ch01	10530481	10535346	ID=SMEL_001g124930.1	Note=Similar to DI19-3: Protein DEHYDRATION-INDUCED 19 homolog 3 (Arabidopsis thaliana OX%3D3702)
SMEL3Ch01	10536703	10540535	ID=SMEL_001g124940.1	Note=Similar to MBD9: Methyl-CpG-binding domain-containing protein 9 (Arabidopsis thaliana OX%3D3702)
SMEL3Ch01	10561066	10568303	ID=SMEL_001g124950.1	Note=Similar to KIN14I: Kinesin-like protein KIN-14I (Arabidopsis thaliana OX%3D3702)
SMEL3Ch01	10578795	10583190	ID=SMEL_001g124960.1	Note=Similar to At1g09160: Probable protein phosphatase 2C 5 (Arabidopsis thaliana OX%3D3702)
SMEL3Ch01	10589423	10590804	ID=SMEL_001g124970.1	Note=Similar to ATL18: RING-H2 finger protein ATL18 (Arabidopsis thaliana OX%3D3702)
SMEL3Ch01	10605702	10606235	ID=SMEL_001g124980.1	Note=Similar to WAKL20: Wall-associated receptor kinase-like 20 (Arabidopsis thaliana OX%3D3702)
SMEL3Ch01	10607828	10612605	ID=SMEL_001g124990.1	Note=Similar to At4g11060: Single-stranded DNA-binding protein%2C mitochondrial (Arabidopsis thaliana OX%3D3702)
SMEL3Ch01	10613721	10614683	ID=SMEL_001g125000.1	Note=Protein of unknown function
SMEL3Ch01	10614933	10618313	ID=SMEL_001g125010.1	Note=Similar to PRP38: Pre-mRNA-splicing factor 38 (Arabidopsis thaliana OX%3D3702)
SMEL3Ch01	10622038	10634895	ID=SMEL_001g125020.1	Note=Similar to TPR3: Topless-related protein 3 (Arabidopsis thaliana OX%3D3702)
SMEL3Ch01	10674474	10677339	ID=SMEL_001g125030.1	Note=Similar to PPC6-7: Probable protein phosphatase 2C 73 (Arabidopsis thaliana OX%3D3702)
SMEL3Ch01	10677504	10678561	ID=SMEL_001g125040.1	Note=Similar to Deoxyuridine 5'-triphosphate nucleotidohydrolase (Solanum lycopersicum OX%3D4081)
SMEL3Ch01	10679907	10694735	ID=SMEL_001g125050.1	Note=Similar to PLDZETA1: Phospholipase D zeta 1 (Arabidopsis thaliana OX%3D3702)
SMEL3Ch01	10703055	10704395	ID=SMEL_001g125060.1	Note=Similar to PP2B15: F-box protein PP2-B15 (Arabidopsis thaliana OX%3D3702)
SMEL3Ch01	10707464	10708709	ID=SMEL_001g125070.1	Note=Similar to PP2B15: F-box protein PP2-B15 (Arabidopsis thaliana OX%3D3702)
SMEL3Ch01	10712354	10714941	ID=SMEL_001g125080.1	Note=Similar to PP2B15: F-box protein PP2-B15 (Arabidopsis thaliana OX%3D3702)
SMEL3Ch01	10719242	10724344	ID=SMEL_001g125090.1	Note=Similar to GRDP1: Glycine-rich domain-containing protein 1 (Arabidopsis thaliana OX%3D3702)
SMEL3Ch01	10731419	10737442	ID=SMEL_001g125100.1	Note=Similar to FBL3: F-box/LRR-repeat protein 3 (Arabidopsis thaliana OX%3D3702)
SMEL3Ch01	10737836	10739571	ID=SMEL_001g125110.1	Note=Similar to PME22: Putative pectinesterase/pectinesterase inhibitor 22 (Arabidopsis thaliana OX%3D3702)
SMEL3Ch01	10743075	10746901	ID=SMEL_001g125120.1	Note=Similar to PME41: Probable pectinesterase/pectinesterase inhibitor 41 (Arabidopsis thaliana OX%3D3702)
SMEL3Ch01	10747227	10750456	ID=SMEL_001g125130.1	Note=Similar to PME28: Putative pectinesterase/pectinesterase inhibitor 28 (Arabidopsis thaliana OX%3D3702)
SMEL3Ch01	10752753	10755639	ID=SMEL_001g125140.1	Note=Protein of unknown function
SMEL3Ch01	10757596	10759080	ID=SMEL_001g125150.1	Note=Protein of unknown function
SMEL3Ch01	10774444	10778992	ID=SMEL_001g125160.1	Note=Similar to KAI2: Probable esterase KAI2 (Arabidopsis thaliana OX%3D3702)
SMEL3Ch01	10779637	10791568	ID=SMEL_001g125170.1	Note=Similar to RPL18B: 60S ribosomal protein L18-2 (Arabidopsis thaliana OX%3D3702)
SMEL3Ch01	10803789	10820355	ID=SMEL_001g125180.1	Note=Similar to SWEET16: Bidirectional sugar transporter SWEET16 (Oryza sativa subsp. japonica OX%3D39947)
SMEL3Ch01	10823560	10825870	ID=SMEL_001g125190.1	Note=Similar to TOPP9: Serine/threonine-protein phosphatase PP1 isozyme 9 (Arabidopsis thaliana OX%3D3702)
SMEL3Ch01	10827324	10833013	ID=SMEL_001g125200.1	Note=Protein of unknown function
SMEL3Ch01	10835552	10837815	ID=SMEL_001g125210.1	Note=Similar to At1g56220: Dormancy-associated protein homolog 3 (Arabidopsis thaliana OX%3D3702)
SMEL3Ch01	10864943	10866842	ID=SMEL_001g125220.1	Note=Similar to RPL22B: 60S ribosomal protein L22-2 (Arabidopsis thaliana OX%3D3702)
SMEL3Ch01	10868338	10869574	ID=SMEL_001g125230.1	Note=Protein of unknown function
SMEL3Ch01	10870837	10881538	ID=SMEL_001g125240.1	Note=Similar to SR30: Serine/arginine-rich splicing factor SR30 (Arabidopsis thaliana OX%3D3702)
SMEL3Ch01	10885518	10894812	ID=SMEL_001g125250.1	Note=Similar to RFI2: E3 ubiquitin-protein ligase RFI2 (Arabidopsis thaliana OX%3D3702)
SMEL3Ch01	10894326	10894631	ID=SMEL_001g125260.1	Note=Protein of unknown function
SMEL3Ch01	11206138	11222799	ID=SMEL_001g125270.1	Note=Similar to Cysteine synthase (Spinacia oleracea OX%3D3562)
SMEL3Ch01	11222801	11225061	ID=SMEL_001g125280.1	Note=Similar to At5g27980: Late embryogenesis abundant protein 47 (Arabidopsis thaliana OX%3D3702)
SMEL3Ch01	11227399	11227861	ID=SMEL_001g125290.1	Note=Similar to DUT: Deoxyuridine 5'-triphosphate nucleotidohydrolase (Arabidopsis thaliana OX%3D3702)
SMEL3Ch01	11231714	11247222	ID=SMEL_001g125300.1	Note=Similar to EDR1: Serine/threonine-protein kinase EDR1 (Arabidopsis thaliana OX%3D3702)
SMEL3Ch01	11248047	11248559	ID=SMEL_001g125310.1	Note=Protein of unknown function
SMEL3Ch01	11256266	11258014	ID=SMEL_001g125320.1	Note=Similar to Elongation factor 1-delta (Pimpinella brachycarpa OX%3D45043)
SMEL3Ch01	11258326	11261460	ID=SMEL_001g125330.1	Note=Protein of unknown function
SMEL3Ch01	11264523	11272270	ID=SMEL_001g125340.1	Note=Protein of unknown function
SMEL3Ch01	11266960	11268483	ID=SMEL_001g125350.1	Note=Similar to At2g17525: Pentatricopeptide repeat-containing protein At2g17525%2C mitochondrial (Arabidopsis thaliana OX%3D3702)
SMEL3Ch01	11272641	11275225	ID=SMEL_001g125360.1	Note=Protein of unknown function
SMEL3Ch01	11277597	11278139	ID=SMEL_001g125370.1	Note=Similar to MADS47: MADS-box transcription factor 47 (Oryza sativa subsp. japonica OX%3D39947)
SMEL3Ch01	11284293	11284892	ID=SMEL_001g125380.1	Note=Similar to MADS47: MADS-box transcription factor 47 (Oryza sativa subsp. japonica OX%3D39947)
SMEL3Ch01	11287282	11287755	ID=SMEL_001g125390.1	Note=Similar to AGL61: Agamous-like MADS-box protein AGL61 (Arabidopsis thaliana OX%3D3702)
SMEL3Ch01	11290391	11291005	ID=SMEL_001g125400.1	Note=Similar to AGL28: Agamous-like MADS-box protein AGL28 (Arabidopsis thaliana OX%3D3702)
SMEL3Ch01	11294379	11297961	ID=SMEL_001g125410.1	Note=Similar to KIN14U: Kinesin-like protein KIN-14U (Arabidopsis thaliana OX%3D3702)
SMEL3Ch01	11304537	11327381	ID=SMEL_001g125420.1	Note=Similar to PRL2: Protein pleiotropic regulator PRL2 (Arabidopsis thaliana OX%3D3702)
SMEL3Ch01	11345872	11346728	ID=SMEL_001g125430.1	Note=Protein of unknown function
SMEL3Ch01	11350376	11367900	ID=SMEL_001g125440.1	Note=Similar to At1g54570: Acyltransferase-like protein At1g54570%2C chloroplastic (Arabidopsis thaliana OX%3D3702)
SMEL3Ch01	11368922	11372818	ID=SMEL_001g125450.1	Note=Protein of unknown function
SMEL3Ch01	11375359	11376390	ID=SMEL_001g125460.1	Note=Similar to CXE1: Carboxylesterase 1 (Actinidia eriantha OX%3D165200)
SMEL3Ch01	11377905	11378909	ID=SMEL_001g125470.1	Note=Similar to CXE1: Carboxylesterase 1 (Actinidia eriantha OX%3D165200)
SMEL3Ch01	11379065	11381749	ID=SMEL_001g125480.1	Note=Similar to EMB175: Pentatricopeptide repeat-containing protein At5g03800 (Arabidopsis thaliana OX%3D3702)
SMEL3Ch01	11382612	11398457	ID=SMEL_001g125490.1	Note=Similar to At1g54610: Probable serine/threonine-protein kinase At1g54610 (Arabidopsis thaliana OX%3D3702)
SMEL3Ch01	11402205	11421030	ID=SMEL_001g125500.1	Note=Similar to HST1: Protein HASTY 1 (Arabidopsis thaliana OX%3D3702)
SMEL3Ch01	11423886	11444344	ID=SMEL_001g125510.1	Note=Similar to CYT1: Mannose-1-phosphate guanylyltransferase 1 (Arabidopsis thaliana OX%3D3702)
SMEL3Ch01	11458139	11466880	ID=SMEL_001g125520.1	Note=Similar to NHX2: Sodium/hydrogen exchanger 2 (Arabidopsis thaliana OX%3D3702)
SMEL3Ch01	11467634	11478237	ID=SMEL_001g125530.1	Note=Similar to PVA22: Vesicle-associated protein 2-2 (Arabidopsis thaliana OX%3D3702)
SMEL3Ch01	11484110	11492831	ID=SMEL_001g125540.1	Note=Protein of unknown function
SMEL3Ch01	11494206	11495737	ID=SMEL_001g125550.1	Note=Similar to LBD20: LOB domain-containing protein 20 (Arabidopsis thaliana OX%3D3702)
SMEL3Ch01	11505290	11512804	ID=SMEL_001g125560.1	Note=Similar to TIM44-2: Mitochondrial import inner membrane translocase subunit TIM44-2 (Arabidopsis thaliana OX%3D3702)
SMEL3Ch01	11521260	11532874	ID=SMEL_001g125570.1	Note=Similar to FRL3: FRIGIDA-like protein 3 (Arabidopsis thaliana OX%3D3702)
SMEL3Ch01	11547470	11550739	ID=SMEL_001g125580.1	Note=Similar to ATJ49: Chaperone protein dnaJ 49 (Arabidopsis thaliana OX%3D3702)
SMEL3Ch01	11574390	11575220	ID=SMEL_001g125590.1	Note=Protein of unknown function
SMEL3Ch01	11575686	11581231	ID=SMEL_001g125600.1	Note=Similar to NRPE5A: DNA-directed RNA polymerase V subunit 5A (Arabidopsis thaliana OX%3D3702)
SMEL3Ch01	11587933	11591385	ID=SMEL_001g125610.1	Note=Protein of unknown function
SMEL3Ch01	11591759	11596847	ID=SMEL_001g125620.1	Note=Similar to CYCL1-1: Cyclin-L1-1 (Arabidopsis thaliana OX%3D3702)
SMEL3Ch01	11598377	11615005	ID=SMEL_001g125630.1	Note=Similar to DAPB1: 4-hydroxy-tetrahydrodipicolinate reductase 1%2C chloroplastic (Arabidopsis thaliana OX%3D3702)
SMEL3Ch01	11620320	11622785	ID=SMEL_001g125640.1	Note=Similar to GID1C: Gibberellin receptor GID1C (Arabidopsis thaliana OX%3D3702)
SMEL3Ch01	11622395	11622529	ID=SMEL_001g125650.1	Note=Protein of unknown function
SMEL3Ch01	11626128	11627487	ID=SMEL_001g125660.1	Note=Similar to AHP1: Histidine-containing phosphotransfer protein 1 (Arabidopsis thaliana OX%3D3702)
SMEL3Ch01	11641040	11651316	ID=SMEL_001g125670.1	Note=Similar to LYK3: LysM domain receptor-like kinase 3 (Medicago truncatula OX%3D3880)
SMEL3Ch01	11651543	11663826	ID=SMEL_001g125680.1	Note=Similar to ATG18H: Autophagy-related protein 18h (Arabidopsis thaliana OX%3D3702)
SMEL3Ch01	11669067	11672071	ID=SMEL_001g125690.1	Note=Protein of unknown function
SMEL3Ch01	11676860	11681302	ID=SMEL_001g125700.1	Note=Similar to RBK2: Receptor-like cytosolic serine/threonine-protein kinase RBK2 (Arabidopsis thaliana OX%3D3702)
SMEL3Ch01	11687514	11690249	ID=SMEL_001g125710.1	Note=Protein of unknown function
SMEL3Ch01	11690489	11691109	ID=SMEL_001g125720.1	Note=Protein of unknown function
SMEL3Ch01	11692522	11698316	ID=SMEL_001g125730.1	Note=Protein of unknown function
SMEL3Ch01	11698699	11701903	ID=SMEL_001g125740.1	Note=Similar to PCMP-E48: Pentatricopeptide repeat-containing protein At2g21090 (Arabidopsis thaliana OX%3D3702)
SMEL3Ch01	11701792	11709016	ID=SMEL_001g125750.1	Note=Similar to At1g54730: Sugar transporter ERD6-like 5 (Arabidopsis thaliana OX%3D3702)
SMEL3Ch01	11711440	11712781	ID=SMEL_001g125760.1	Note=Similar to At1g47710: Serpin-ZX (Arabidopsis thaliana OX%3D3702)
SMEL3Ch01	11717220	11728943	ID=SMEL_001g125770.1	Note=Similar to At1g54730: Sugar transporter ERD6-like 5 (Arabidopsis thaliana OX%3D3702)
SMEL3Ch01	11729935	11738352	ID=SMEL_001g125780.1	Note=Similar to TRPA1: Tryptophan synthase alpha chain (Arabidopsis thaliana OX%3D3702)
SMEL3Ch01	11751739	11756258	ID=SMEL_001g125790.1	Note=Similar to At1g54730: Sugar transporter ERD6-like 5 (Arabidopsis thaliana OX%3D3702)
SMEL3Ch01	11758943	11759809	ID=SMEL_001g125800.1	Note=Protein of unknown function
SMEL3Ch01	11761959	11763171	ID=SMEL_001g125810.1	Note=Similar to PNSB3: Photosynthetic NDH subunit of subcomplex B 3%2C chloroplastic (Arabidopsis thaliana OX%3D3702)
SMEL3Ch01	11765045	11765780	ID=SMEL_001g125820.1	Note=Similar to At3g05170: Phosphoglycerate mutase-like protein AT74 (Arabidopsis thaliana OX%3D3702)
SMEL3Ch01	11766805	11770372	ID=SMEL_001g125830.1	Note=Similar to At3g05170: Phosphoglycerate mutase-like protein AT74 (Arabidopsis thaliana OX%3D3702)
SMEL3Ch01	11775263	11776994	ID=SMEL_001g125840.1	Note=Similar to At3g05170: Phosphoglycerate mutase-like protein AT74 (Arabidopsis thaliana OX%3D3702)
SMEL3Ch01	11779779	11784890	ID=SMEL_001g125850.1	Note=Protein of unknown function
SMEL3Ch01	11785308	11791675	ID=SMEL_001g125860.1	Note=Similar to GSH2: Glutathione synthetase%2C chloroplastic (Solanum lycopersicum OX%3D4081)
SMEL3Ch01	11792631	11793359	ID=SMEL_001g125870.1	Note=Protein of unknown function
SMEL3Ch01	11800365	11802456	ID=SMEL_001g125880.1	Note=Protein of unknown function
SMEL3Ch01	11802767	11805315	ID=SMEL_001g125890.1	Note=Similar to At1g54780: UPF0603 protein At1g54780%2C chloroplastic (Arabidopsis thaliana OX%3D3702)
SMEL3Ch01	11805300	11807227	ID=SMEL_001g125900.1	Note=Similar to At1g54790: GDSL esterase/lipase At1g54790 (Arabidopsis thaliana OX%3D3702)
SMEL3Ch01	11809494	11813559	ID=SMEL_001g125910.1	Note=Similar to KIN1: Kinesin-like protein KIN-1 (Arabidopsis thaliana OX%3D3702)
SMEL3Ch01	11817929	11820685	ID=SMEL_001g125920.1	Note=Similar to RLP50: Receptor-like protein 50 (Arabidopsis thaliana OX%3D3702)
SMEL3Ch01	11822186	11826135	ID=SMEL_001g125930.1	Note=Similar to RLP47: Receptor-like protein 47 (Arabidopsis thaliana OX%3D3702)
SMEL3Ch01	11845298	11845687	ID=SMEL_001g125940.1	Note=Protein of unknown function
SMEL3Ch01	11848371	11861492	ID=SMEL_001g125950.1	Note=Similar to At5g27410: Branched-chain-amino-acid aminotransferase-like protein 2 (Arabidopsis thaliana OX%3D3702)
SMEL3Ch01	11868858	11876357	ID=SMEL_001g125960.1	Note=Similar to At1g65240: Aspartic proteinase-like protein 2 (Arabidopsis thaliana OX%3D3702)
SMEL3Ch01	11897164	11898660	ID=SMEL_001g125970.1	Note=Similar to BHLH96: Transcription factor bHLH96 (Arabidopsis thaliana OX%3D3702)
SMEL3Ch01	11914805	11916088	ID=SMEL_001g125980.1	Note=Similar to ATL6: E3 ubiquitin-protein ligase ATL6 (Arabidopsis thaliana OX%3D3702)
SMEL3Ch01	11921650	11925226	ID=SMEL_001g125990.1	Note=Similar to PBL7: Probable serine/threonine-protein kinase PBL7 (Arabidopsis thaliana OX%3D3702)
SMEL3Ch01	11930915	11936351	ID=SMEL_001g126000.1	Note=Similar to LUL3: Probable E3 ubiquitin-protein ligase LUL3 (Arabidopsis thaliana OX%3D3702)
SMEL3Ch01	11951002	11954600	ID=SMEL_001g126010.1	Note=Similar to HIPP32: Heavy metal-associated isoprenylated plant protein 32 (Arabidopsis thaliana OX%3D3702)
SMEL3Ch01	11955957	11957252	ID=SMEL_001g126020.1	Note=Similar to BG: Basic 7S globulin (Glycine max OX%3D3847)
SMEL3Ch01	11957900	11961320	ID=SMEL_001g126030.1	Note=Similar to At5g27430: Signal peptidase complex subunit 3B (Arabidopsis thaliana OX%3D3702)
SMEL3Ch01	11963672	11965362	ID=SMEL_001g126040.1	Note=Similar to IDM3: Increased DNA methylation 3 (Arabidopsis thaliana OX%3D3702)
SMEL3Ch01	11965992	11972825	ID=SMEL_001g126050.1	Note=Similar to CCX5: Cation/calcium exchanger 5 (Arabidopsis thaliana OX%3D3702)
SMEL3Ch01	11976956	11979737	ID=SMEL_001g126060.1	Note=Similar to ACD22.3: Alpha-crystallin domain-containing protein 22.3 (Arabidopsis thaliana OX%3D3702)
SMEL3Ch01	11982572	11986124	ID=SMEL_001g126070.1	Note=Similar to ACD22.3: Alpha-crystallin domain-containing protein 22.3 (Arabidopsis thaliana OX%3D3702)
SMEL3Ch01	11987636	11989738	ID=SMEL_001g126080.1	Note=Similar to CPT1: Coleoptile phototropism protein 1 (Oryza sativa subsp. japonica OX%3D39947)
SMEL3Ch01	11990536	11995106	ID=SMEL_001g126090.1	Note=Protein of unknown function
SMEL3Ch01	11997652	12002851	ID=SMEL_001g126100.1	Note=Similar to At5g27450: Mevalonate kinase (Arabidopsis thaliana OX%3D3702)
SMEL3Ch01	12002886	12005122	ID=SMEL_001g126110.1	Note=Similar to ChlADR1: NADPH-dependent aldehyde reductase 1%2C chloroplastic (Arabidopsis thaliana OX%3D3702)
SMEL3Ch01	12005729	12007828	ID=SMEL_001g126120.1	Note=Similar to At3g06035: Uncharacterized GPI-anchored protein At3g06035 (Arabidopsis thaliana OX%3D3702)
SMEL3Ch01	12010471	12028456	ID=SMEL_001g126130.1	Note=Protein of unknown function
SMEL3Ch01	12032199	12038893	ID=SMEL_001g126140.1	Note=Similar to Serine--tRNA ligase (Helianthus annuus OX%3D4232)
SMEL3Ch01	12040728	12040952	ID=SMEL_001g126150.1	Note=Protein of unknown function
SMEL3Ch01	12043716	12049607	ID=SMEL_001g126160.1	Note=Protein of unknown function
SMEL3Ch01	12050831	12054775	ID=SMEL_001g126170.1	Note=Similar to PNC1: Peroxisomal adenine nucleotide carrier 1 (Arabidopsis thaliana OX%3D3702)
SMEL3Ch01	12064855	12078009	ID=SMEL_001g126180.1	Note=Similar to MIRO1: Mitochondrial Rho GTPase 1 (Arabidopsis thaliana OX%3D3702)
SMEL3Ch01	12082898	12083667	ID=SMEL_001g126190.1	Note=Similar to CYCP3-1: Cyclin-P3-1 (Oryza sativa subsp. japonica OX%3D39947)
SMEL3Ch01	12087172	12090992	ID=SMEL_001g126200.1	Note=Similar to PME25: Probable pectinesterase/pectinesterase inhibitor 25 (Arabidopsis thaliana OX%3D3702)
SMEL3Ch01	12095181	12097898	ID=SMEL_001g126210.1	Note=Similar to GUX4: Putative UDP-glucuronate:xylan alpha-glucuronosyltransferase 4 (Arabidopsis thaliana OX%3D3702)
SMEL3Ch01	12099049	12103007	ID=SMEL_001g126220.1	Note=Similar to GUX4: Putative UDP-glucuronate:xylan alpha-glucuronosyltransferase 4 (Arabidopsis thaliana OX%3D3702)
SMEL3Ch01	12103212	12110902	ID=SMEL_001g126230.1	Note=Similar to NPK1: Mitogen-activated protein kinase kinase kinase NPK1 (Nicotiana tabacum OX%3D4097)
SMEL3Ch01	12111622	12117099	ID=SMEL_001g126240.1	Note=Similar to KIN14S: Kinesin-like protein KIN-14S (Arabidopsis thaliana OX%3D3702)
SMEL3Ch01	12118365	12124807	ID=SMEL_001g126250.1	Note=Protein of unknown function
SMEL3Ch01	12124863	12126863	ID=SMEL_001g126260.1	Note=Similar to PCMP-E83: Pentatricopeptide repeat-containing protein At3g05340 (Arabidopsis thaliana OX%3D3702)
SMEL3Ch01	12130987	12133888	ID=SMEL_001g126270.1	Note=Similar to At5g03980: GDSL esterase/lipase At5g03980 (Arabidopsis thaliana OX%3D3702)
SMEL3Ch01	12144618	12147269	ID=SMEL_001g126280.1	Note=Similar to AAE: Acetylajmalan esterase (Rauvolfia serpentina OX%3D4060)
SMEL3Ch01	12150530	12155812	ID=SMEL_001g126290.1	Note=Similar to AAE: Acetylajmalan esterase (Rauvolfia serpentina OX%3D4060)
SMEL3Ch01	12156454	12157995	ID=SMEL_001g126300.1	Note=Similar to At5g03980: GDSL esterase/lipase At5g03980 (Arabidopsis thaliana OX%3D3702)
SMEL3Ch01	12160472	12164321	ID=SMEL_001g126310.1	Note=Similar to AAE: Acetylajmalan esterase (Rauvolfia serpentina OX%3D4060)
SMEL3Ch01	12167013	12172463	ID=SMEL_001g126320.1	Note=Similar to EBM: Mannosylglycoprotein endo-beta-mannosidase (Lilium longiflorum OX%3D4690)
SMEL3Ch01	12172453	12173976	ID=SMEL_001g126330.1	Note=Similar to atpA: ATP synthase subunit alpha%2C chloroplastic (Solanum lycopersicum OX%3D4081)
SMEL3Ch01	12192692	12208686	ID=SMEL_001g126340.1	Note=Similar to LACS6: Long chain acyl-CoA synthetase 6%2C peroxisomal (Arabidopsis thaliana OX%3D3702)
SMEL3Ch01	12210756	12220912	ID=SMEL_001g126350.1	Note=Similar to APP2: Aminopeptidase P2 (Arabidopsis thaliana OX%3D3702)
SMEL3Ch01	12221965	12227429	ID=SMEL_001g126360.1	Note=Similar to AXR4: Protein AUXIN RESPONSE 4 (Arabidopsis thaliana OX%3D3702)
SMEL3Ch01	12227988	12230750	ID=SMEL_001g126370.1	Note=Similar to At1g55000: F-box protein At1g55000 (Arabidopsis thaliana OX%3D3702)
SMEL3Ch01	12231025	12244923	ID=SMEL_001g126380.1	Note=Similar to KMS1: Vacuole membrane protein KMS1 (Arabidopsis thaliana OX%3D3702)
SMEL3Ch01	12255657	12274332	ID=SMEL_001g126390.1	Note=Similar to LOX1.5: Probable linoleate 9S-lipoxygenase 5 (Solanum tuberosum OX%3D4113)
SMEL3Ch01	12278922	12283837	ID=SMEL_001g126400.1	Note=Similar to LOX1.5: Probable linoleate 9S-lipoxygenase 5 (Solanum tuberosum OX%3D4113)
SMEL3Ch01	12291484	12311680	ID=SMEL_001g126410.1	Note=Similar to REV3: DNA polymerase zeta catalytic subunit (Arabidopsis thaliana OX%3D3702)
SMEL3Ch01	12317201	12318277	ID=SMEL_001g126420.1	Note=Similar to At4g29120: Probable 3-hydroxyisobutyrate dehydrogenase-like 1%2C mitochondrial (Arabidopsis thaliana OX%3D3702)
SMEL3Ch01	12319413	12323501	ID=SMEL_001g126430.1	Note=Similar to EIX2: Receptor-like protein EIX2 (Solanum lycopersicum OX%3D4081)
SMEL3Ch01	12335538	12338104	ID=SMEL_001g126440.1	Note=Protein of unknown function
SMEL3Ch01	12338280	12340989	ID=SMEL_001g126450.1	Note=Similar to TAN: Microtubule-binding protein TANGLED (Arabidopsis thaliana OX%3D3702)
SMEL3Ch01	12343821	12350830	ID=SMEL_001g126460.1	Note=Similar to SNF4: Sucrose nonfermenting 4-like protein (Arabidopsis thaliana OX%3D3702)
SMEL3Ch01	12363696	12371377	ID=SMEL_001g126470.1	Note=Similar to SNF4: Sucrose nonfermenting 4-like protein (Arabidopsis thaliana OX%3D3702)
SMEL3Ch01	12378656	12385732	ID=SMEL_001g126480.1	Note=Similar to CUL1: Cullin-1 (Oryza sativa subsp. japonica OX%3D39947)
SMEL3Ch01	12387539	12414147	ID=SMEL_001g126490.1	Note=Similar to MORC6: Protein MICRORCHIDIA 6 (Arabidopsis thaliana OX%3D3702)
SMEL3Ch01	12424782	12434293	ID=SMEL_001g126500.1	Note=Similar to ACBP4: Acyl-CoA-binding domain-containing protein 4 (Arabidopsis thaliana OX%3D3702)
SMEL3Ch01	12447266	12455487	ID=SMEL_001g126510.1	Note=Similar to CYCH1-1: Cyclin-H1-1 (Oryza sativa subsp. japonica OX%3D39947)
SMEL3Ch01	12458857	12459451	ID=SMEL_001g126520.1	Note=Similar to NFYB4: Nuclear transcription factor Y subunit B-4 (Arabidopsis thaliana OX%3D3702)
SMEL3Ch01	12463441	12464853	ID=SMEL_001g126530.1	Note=Similar to ERD3: Probable methyltransferase PMT21 (Arabidopsis thaliana OX%3D3702)
SMEL3Ch01	12470983	12471590	ID=SMEL_001g126540.1	Note=Protein of unknown function
SMEL3Ch01	12472201	12476787	ID=SMEL_001g126550.1	Note=Similar to GAF1: Zinc finger protein GAI-ASSOCIATED FACTOR 1 (Arabidopsis thaliana OX%3D3702)
SMEL3Ch01	12477789	12478249	ID=SMEL_001g126560.1	Note=Similar to Histone H1 (Zea mays OX%3D4577)
SMEL3Ch01	12480752	12498212	ID=SMEL_001g126570.1	Note=Similar to ACBP4: Acyl-CoA-binding domain-containing protein 4 (Arabidopsis thaliana OX%3D3702)
SMEL3Ch01	12520969	12522116	ID=SMEL_001g126580.1	Note=Similar to ACBP4: Acyl-CoA-binding domain-containing protein 4 (Arabidopsis thaliana OX%3D3702)
SMEL3Ch01	12529901	12530662	ID=SMEL_001g126590.1	Note=Protein of unknown function
SMEL3Ch01	12531375	12532631	ID=SMEL_001g126600.1	Note=Protein of unknown function
SMEL3Ch01	12552885	12554252	ID=SMEL_001g126610.1	Note=Protein of unknown function
SMEL3Ch01	12569541	12572787	ID=SMEL_001g126620.1	Note=Protein of unknown function
SMEL3Ch01	12578426	12579256	ID=SMEL_001g126630.1	Note=Similar to SRC2: Protein SRC2 (Glycine max OX%3D3847)
SMEL3Ch01	12581641	12589235	ID=SMEL_001g126640.1	Note=Similar to DOT2: SART-1 family protein DOT2 (Arabidopsis thaliana OX%3D3702)
SMEL3Ch01	12591833	12592801	ID=SMEL_001g126650.1	Note=Similar to SRC2: Protein SRC2 homolog (Arabidopsis thaliana OX%3D3702)
SMEL3Ch01	12594570	12599737	ID=SMEL_001g126660.1	Note=Similar to ATG18A: Autophagy-related protein 18a (Arabidopsis thaliana OX%3D3702)
SMEL3Ch01	12624513	12625293	ID=SMEL_001g126670.1	Note=Similar to Histone H2A.1 (Solanum lycopersicum OX%3D4081)
SMEL3Ch01	12634589	12648552	ID=SMEL_001g126680.1	Note=Similar to RECQSIM: ATP-dependent DNA helicase Q-like SIM (Arabidopsis thaliana OX%3D3702)
SMEL3Ch01	12649675	12651260	ID=SMEL_001g126690.1	Note=Protein of unknown function
SMEL3Ch01	12668264	12668644	ID=SMEL_001g126700.1	Note=Similar to RALF: Rapid alkalinization factor (Nicotiana tabacum OX%3D4097)
SMEL3Ch01	12677838	12685387	ID=SMEL_001g126710.1	Note=Similar to At5g14770: Pentatricopeptide repeat-containing protein At5g14770%2C mitochondrial (Arabidopsis thaliana OX%3D3702)
SMEL3Ch01	12685679	12686326	ID=SMEL_001g126720.1	Note=Protein of unknown function
SMEL3Ch01	12688686	12699236	ID=SMEL_001g126730.1	Note=Similar to Desiccation-related protein PCC13-62 (Craterostigma plantagineum OX%3D4153)
SMEL3Ch01	12709638	12711337	ID=SMEL_001g126740.1	Note=Similar to HIPP35: Heavy metal-associated isoprenylated plant protein 35 (Arabidopsis thaliana OX%3D3702)
SMEL3Ch01	12721631	12725629	ID=SMEL_001g126750.1	Note=Similar to RBOHB: Respiratory burst oxidase homolog protein B (Solanum tuberosum OX%3D4113)
SMEL3Ch01	12730550	12733228	ID=SMEL_001g126760.1	Note=Similar to XTH1: Probable xyloglucan endotransglucosylase/hydrolase 1 (Solanum lycopersicum OX%3D4081)
SMEL3Ch01	12749266	12752594	ID=SMEL_001g126770.1	Note=Similar to FH11: Formin-like protein 11 (Arabidopsis thaliana OX%3D3702)
SMEL3Ch01	12754626	12757887	ID=SMEL_001g126780.1	Note=Similar to BIP5: Luminal-binding protein 5 (Nicotiana tabacum OX%3D4097)
SMEL3Ch01	12758422	12760501	ID=SMEL_001g126790.1	Note=Similar to RPS10A: 40S ribosomal protein S10-1 (Arabidopsis thaliana OX%3D3702)
SMEL3Ch01	12764383	12766597	ID=SMEL_001g126800.1	Note=Similar to SRP: Stress-related protein (Vitis riparia OX%3D96939)
SMEL3Ch01	12767924	12781448	ID=SMEL_001g126810.1	Note=Similar to CLPR3: ATP-dependent Clp protease proteolytic subunit-related protein 3%2C chloroplastic (Arabidopsis thaliana OX%3D3702)
SMEL3Ch01	12782013	12792329	ID=SMEL_001g126820.1	Note=Protein of unknown function
SMEL3Ch01	12793784	12797165	ID=SMEL_001g126830.1	Note=Similar to At1g78690: N-acylphosphatidylethanolamine synthase (Arabidopsis thaliana OX%3D3702)
SMEL3Ch01	12798081	12805627	ID=SMEL_001g126840.1	Note=Similar to At3g05520: F-actin-capping protein subunit alpha (Arabidopsis thaliana OX%3D3702)
SMEL3Ch01	12807655	12814802	ID=SMEL_001g126850.1	Note=Similar to Probable U6 snRNA-associated Sm-like protein LSm4 (Nicotiana tabacum OX%3D4097)
SMEL3Ch01	12816157	12822434	ID=SMEL_001g126860.1	Note=Similar to TBP1: 26S proteasome regulatory subunit 6A homolog (Solanum lycopersicum OX%3D4081)
SMEL3Ch01	12825454	12832401	ID=SMEL_001g126870.1	Note=Similar to TCTP: Translationally-controlled tumor protein homolog (Solanum lycopersicum OX%3D4081)
SMEL3Ch01	12924889	12929427	ID=SMEL_001g126880.1	Note=Similar to Cysteine synthase (Citrullus lanatus OX%3D3654)
SMEL3Ch01	12942449	12948070	ID=SMEL_001g126890.1	Note=Similar to OASB: Cysteine synthase%2C chloroplastic/chromoplastic (Arabidopsis thaliana OX%3D3702)
SMEL3Ch01	12951547	12953999	ID=SMEL_001g126900.1	Note=Protein of unknown function
SMEL3Ch01	12955273	12955506	ID=SMEL_001g126910.1	Note=Protein of unknown function
SMEL3Ch01	12971189	12972460	ID=SMEL_001g126920.1	Note=Similar to At5g28040: Probable transcription factor At5g28040 (Arabidopsis thaliana OX%3D3702)
SMEL3Ch01	12973189	12978083	ID=SMEL_001g126930.1	Note=Similar to GSDA: Guanosine deaminase (Arabidopsis thaliana OX%3D3702)
SMEL3Ch01	12982290	12985808	ID=SMEL_001g126940.1	Note=Similar to RPS24B: 40S ribosomal protein S24-2 (Arabidopsis thaliana OX%3D3702)
SMEL3Ch01	12988551	12996979	ID=SMEL_001g126950.1	Note=Protein of unknown function
SMEL3Ch01	13003225	13006732	ID=SMEL_001g126960.1	Note=Similar to WNK1: Serine/threonine-protein kinase WNK1 (Arabidopsis thaliana OX%3D3702)
SMEL3Ch01	13023722	13024750	ID=SMEL_001g126970.1	Note=Protein of unknown function
SMEL3Ch01	13025249	13029643	ID=SMEL_001g126980.1	Note=Protein of unknown function
SMEL3Ch01	13030174	13041431	ID=SMEL_001g126990.1	Note=Similar to ZDS: Zeta-carotene desaturase%2C chloroplastic/chromoplastic (Solanum lycopersicum OX%3D4081)
SMEL3Ch01	13052493	13053410	ID=SMEL_001g127000.1	Note=Similar to DRT102: DNA damage-repair/toleration protein DRT102 (Arabidopsis thaliana OX%3D3702)
SMEL3Ch01	13067617	13068945	ID=SMEL_001g127010.1	Note=Protein of unknown function
SMEL3Ch01	13077292	13090656	ID=SMEL_001g127020.1	Note=Similar to PHOT2: Phototropin-2 (Arabidopsis thaliana OX%3D3702)
SMEL3Ch01	13091570	13100646	ID=SMEL_001g127030.1	Note=Protein of unknown function
SMEL3Ch01	13102300	13110692	ID=SMEL_001g127040.1	Note=Similar to At3g60050: Pentatricopeptide repeat-containing protein At3g60050 (Arabidopsis thaliana OX%3D3702)
SMEL3Ch01	13111025	13112023	ID=SMEL_001g127050.1	Note=Protein of unknown function
SMEL3Ch01	13112919	13115468	ID=SMEL_001g127060.1	Note=Similar to EMB2261: Pentatricopeptide repeat-containing protein At3g49170%2C chloroplastic (Arabidopsis thaliana OX%3D3702)
SMEL3Ch01	13116479	13120062	ID=SMEL_001g127070.1	Note=Protein of unknown function
SMEL3Ch01	13136313	13152297	ID=SMEL_001g127080.1	Note=Protein of unknown function
SMEL3Ch01	13147974	13148288	ID=SMEL_001g127090.1	Note=Protein of unknown function
SMEL3Ch01	13155022	13158091	ID=SMEL_001g127100.1	Note=Similar to At5g07610: F-box protein At5g07610 (Arabidopsis thaliana OX%3D3702)
SMEL3Ch01	13159666	13160748	ID=SMEL_001g127110.1	Note=Similar to At5g49610: F-box protein At5g49610 (Arabidopsis thaliana OX%3D3702)
SMEL3Ch01	13176387	13194722	ID=SMEL_001g127120.1	Note=Protein of unknown function
SMEL3Ch01	13201486	13203229	ID=SMEL_001g127130.1	Note=Similar to ANN4: Annexin D4 (Arabidopsis thaliana OX%3D3702)
SMEL3Ch01	13213377	13218078	ID=SMEL_001g127140.1	Note=Similar to ANN3: Annexin D3 (Arabidopsis thaliana OX%3D3702)
SMEL3Ch01	13218717	13222419	ID=SMEL_001g127150.1	Note=Similar to ANN4: Annexin D4 (Arabidopsis thaliana OX%3D3702)
SMEL3Ch01	13231083	13234552	ID=SMEL_001g127160.1	Note=Similar to ANN3: Annexin D3 (Arabidopsis thaliana OX%3D3702)
SMEL3Ch01	13238478	13250513	ID=SMEL_001g127170.1	Note=Similar to NEK2: Serine/threonine-protein kinase Nek2 (Oryza sativa subsp. japonica OX%3D39947)
SMEL3Ch01	13250784	13252295	ID=SMEL_001g127180.1	Note=Similar to IQD14: Protein IQ-DOMAIN 14 (Arabidopsis thaliana OX%3D3702)
SMEL3Ch01	13255246	13258832	ID=SMEL_001g127190.1	Note=Protein of unknown function
SMEL3Ch01	13260317	13261183	ID=SMEL_001g127200.1	Note=Similar to RPI3: Probable ribose-5-phosphate isomerase 3%2C chloroplastic (Arabidopsis thaliana OX%3D3702)
SMEL3Ch01	13261799	13272101	ID=SMEL_001g127210.1	Note=Similar to At3g04780: PITH domain-containing protein At3g04780 (Arabidopsis thaliana OX%3D3702)
SMEL3Ch01	13273369	13289935	ID=SMEL_001g127220.1	Note=Similar to PNG1: Peptide-N(4)-(N-acetyl-beta-glucosaminyl)asparagine amidase (Arabidopsis thaliana OX%3D3702)
SMEL3Ch01	13295239	13298556	ID=SMEL_001g127230.1	Note=Similar to ABCG19: ABC transporter G family member 19 (Arabidopsis thaliana OX%3D3702)
SMEL3Ch01	13306078	13309685	ID=SMEL_001g127240.1	Note=Similar to ACA13: Putative calcium-transporting ATPase 13%2C plasma membrane-type (Arabidopsis thaliana OX%3D3702)
SMEL3Ch01	13313924	13318183	ID=SMEL_001g127250.1	Note=Similar to PR: Perakine reductase (Rauvolfia serpentina OX%3D4060)
SMEL3Ch01	13329189	13330851	ID=SMEL_001g127260.1	Note=Similar to AMT3-1: Ammonium transporter 3 member 1 (Oryza sativa subsp. japonica OX%3D39947)
SMEL3Ch01	13331449	13331724	ID=SMEL_001g127270.1	Note=Protein of unknown function
SMEL3Ch01	13335517	13342382	ID=SMEL_001g127280.1	Note=Protein of unknown function
SMEL3Ch01	13344049	13347580	ID=SMEL_001g127290.1	Note=Similar to GME-1: GDP-mannose 3%2C5-epimerase 1 (Oryza sativa subsp. japonica OX%3D39947)
SMEL3Ch01	13365681	13371843	ID=SMEL_001g127300.1	Note=Similar to CPRF2: Light-inducible protein CPRF2 (Petroselinum crispum OX%3D4043)
SMEL3Ch01	13375253	13399017	ID=SMEL_001g127310.1	Note=Similar to MED14: Mediator of RNA polymerase II transcription subunit 14 (Arabidopsis thaliana OX%3D3702)
SMEL3Ch01	13399160	13403207	ID=SMEL_001g127320.1	Note=Similar to TATA: Sec-independent protein translocase protein TATA%2C chloroplastic (Pisum sativum OX%3D3888)
SMEL3Ch01	13403375	13407364	ID=SMEL_001g127330.1	Note=Similar to AIP3: Probable prefoldin subunit 4 (Arabidopsis thaliana OX%3D3702)
SMEL3Ch01	13409910	13413305	ID=SMEL_001g127340.1	Note=Similar to IAA16: Auxin-responsive protein IAA16 (Arabidopsis thaliana OX%3D3702)
SMEL3Ch01	13426392	13428257	ID=SMEL_001g127350.1	Note=Similar to WIN1: Wound-induced protein WIN1 (Solanum tuberosum OX%3D4113)
SMEL3Ch01	13430848	13432583	ID=SMEL_001g127360.1	Note=Similar to WIN2: Wound-induced protein WIN2 (Solanum tuberosum OX%3D4113)
SMEL3Ch01	13434807	13439702	ID=SMEL_001g127370.1	Note=Similar to LIMYB: L10-interacting MYB domain-containing protein (Arabidopsis thaliana OX%3D3702)
SMEL3Ch01	13445286	13445864	ID=SMEL_001g127380.1	Note=Similar to Pathogenesis-related protein P2 (Solanum lycopersicum OX%3D4081)
SMEL3Ch01	13446639	13447283	ID=SMEL_001g127390.1	Note=Similar to PRA1F2: PRA1 family protein F2 (Arabidopsis thaliana OX%3D3702)
SMEL3Ch01	13450750	13451130	ID=SMEL_001g127400.1	Note=Protein of unknown function
SMEL3Ch01	13459216	13474545	ID=SMEL_001g127410.1	Note=Similar to HOP3: Hsp70-Hsp90 organizing protein 3 (Arabidopsis thaliana OX%3D3702)
SMEL3Ch01	13476435	13478215	ID=SMEL_001g127420.1	Note=Protein of unknown function
SMEL3Ch01	13486203	13486715	ID=SMEL_001g127430.1	Note=Protein of unknown function
SMEL3Ch01	13489319	13499435	ID=SMEL_001g127440.1	Note=Protein of unknown function
SMEL3Ch01	13500157	13505291	ID=SMEL_001g127450.1	Note=Similar to CDC25: Dual specificity phosphatase Cdc25 (Arabidopsis thaliana OX%3D3702)
SMEL3Ch01	13507113	13509176	ID=SMEL_001g127460.1	Note=Similar to At3g62470: Pentatricopeptide repeat-containing protein At3g62470%2C mitochondrial (Arabidopsis thaliana OX%3D3702)
SMEL3Ch01	13510272	13515521	ID=SMEL_001g127470.1	Note=Similar to WDL2: Protein WVD2-like 2 (Arabidopsis thaliana OX%3D3702)
SMEL3Ch01	13529447	13547040	ID=SMEL_001g127480.1	Note=Protein of unknown function
SMEL3Ch01	13564815	13565810	ID=SMEL_001g127490.1	Note=Protein of unknown function
SMEL3Ch01	13569117	13570313	ID=SMEL_001g127500.1	Note=Protein of unknown function
SMEL3Ch01	13573553	13574035	ID=SMEL_001g127510.1	Note=Protein of unknown function
SMEL3Ch01	13575469	13576494	ID=SMEL_001g127520.1	Note=Protein of unknown function
SMEL3Ch01	13579626	13580621	ID=SMEL_001g127530.1	Note=Protein of unknown function
SMEL3Ch01	13585833	13588252	ID=SMEL_001g127540.1	Note=Protein of unknown function
SMEL3Ch01	13590202	13594690	ID=SMEL_001g127550.1	Note=Similar to RPA1C: Replication protein A 70 kDa DNA-binding subunit C (Oryza sativa subsp. japonica OX%3D39947)
SMEL3Ch01	13601505	13603434	ID=SMEL_001g127560.1	Note=Protein of unknown function
SMEL3Ch01	13604799	13608657	ID=SMEL_001g127570.1	Note=Similar to At2g34160: Uncharacterized protein At2g34160 (Arabidopsis thaliana OX%3D3702)
SMEL3Ch01	13609065	13613756	ID=SMEL_001g127580.1	Note=Similar to MYOB1: Myosin-binding protein 1 (Arabidopsis thaliana OX%3D3702)
SMEL3Ch01	13634403	13652837	ID=SMEL_001g127590.1	Note=Similar to FLK: Flowering locus K homology domain (Arabidopsis thaliana OX%3D3702)
SMEL3Ch01	13653549	13654373	ID=SMEL_001g127600.1	Note=Protein of unknown function
SMEL3Ch01	13657267	13663685	ID=SMEL_001g127610.1	Note=Similar to Xyl2: Beta-xylosidase/alpha-L-arabinofuranosidase 2 (Medicago sativa subsp. varia OX%3D36902)
SMEL3Ch01	13666571	13671610	ID=SMEL_001g127620.1	Note=Similar to VPS9A: Vacuolar protein sorting-associated protein 9A (Oryza sativa subsp. japonica OX%3D39947)
SMEL3Ch01	13672775	13674618	ID=SMEL_001g127630.1	Note=Similar to RTM2: Inactive protein RESTRICTED TEV MOVEMENT 2 (Arabidopsis thaliana OX%3D3702)
SMEL3Ch01	13689020	13697149	ID=SMEL_001g127640.1	Note=Similar to RBL: Protein RBL (Arabidopsis thaliana OX%3D3702)
SMEL3Ch01	13707982	13713423	ID=SMEL_001g127650.1	Note=Similar to At3g03770: Probable inactive leucine-rich repeat receptor-like protein kinase At3g03770 (Arabidopsis thaliana OX%3D3702)
SMEL3Ch01	13715521	13720956	ID=SMEL_001g127660.1	Note=Similar to ALA1: Phospholipid-transporting ATPase 1 (Arabidopsis thaliana OX%3D3702)
SMEL3Ch01	13733979	13743916	ID=SMEL_001g127670.1	Note=Protein of unknown function
SMEL3Ch01	13745915	13752279	ID=SMEL_001g127680.1	Note=Similar to VPS36: Vacuolar protein sorting-associated protein 36 (Arabidopsis thaliana OX%3D3702)
SMEL3Ch01	13761389	13790468	ID=SMEL_001g127690.1	Note=Similar to GYRA: DNA gyrase subunit A%2C chloroplastic/mitochondrial (Nicotiana benthamiana OX%3D4100)
SMEL3Ch01	13798272	13806227	ID=SMEL_001g127700.1	Note=Protein of unknown function
SMEL3Ch01	13812091	13817563	ID=SMEL_001g127710.1	Note=Similar to NPF6.2: Protein NRT1/ PTR FAMILY 6.2 (Arabidopsis thaliana OX%3D3702)
SMEL3Ch01	13818731	13828778	ID=SMEL_001g127720.1	Note=Similar to OVA6: Proline--tRNA ligase%2C chloroplastic/mitochondrial (Arabidopsis thaliana OX%3D3702)
SMEL3Ch01	13851777	13857285	ID=SMEL_001g127730.1	Note=Similar to WRI1: Ethylene-responsive transcription factor WRI1 (Arabidopsis thaliana OX%3D3702)
SMEL3Ch01	13858901	13867004	ID=SMEL_001g127740.1	Note=Similar to FRS3: Protein FAR1-RELATED SEQUENCE 3 (Arabidopsis thaliana OX%3D3702)
SMEL3Ch01	13869783	13871633	ID=SMEL_001g127750.1	Note=Similar to EDE1: Protein ENDOSPERM DEFECTIVE 1 (Arabidopsis thaliana OX%3D3702)
SMEL3Ch01	13878664	13906113	ID=SMEL_001g127760.1	Note=Similar to PDR2: Probable manganese-transporting ATPase PDR2 (Arabidopsis thaliana OX%3D3702)
SMEL3Ch01	13907878	13908412	ID=SMEL_001g127770.1	Note=Similar to AGL103: Agamous-like MADS-box protein AGL103 (Arabidopsis thaliana OX%3D3702)
SMEL3Ch01	13909848	13914083	ID=SMEL_001g127780.1	Note=Similar to CCAMK: Calcium and calcium/calmodulin-dependent serine/threonine-protein kinase (Lotus japonicus OX%3D34305)
SMEL3Ch01	13921678	13923501	ID=SMEL_001g127790.1	Note=Similar to EIN3: Protein ETHYLENE INSENSITIVE 3 (Arabidopsis thaliana OX%3D3702)
SMEL3Ch01	13927109	13931863	ID=SMEL_001g127800.1	Note=Similar to PPAN: Peter Pan-like protein (Arabidopsis thaliana OX%3D3702)
SMEL3Ch01	13933315	13934620	ID=SMEL_001g127810.1	Note=Protein of unknown function
SMEL3Ch01	13935197	13942079	ID=SMEL_001g127820.1	Note=Similar to SUN1: SUN domain-containing protein 1 (Arabidopsis thaliana OX%3D3702)
SMEL3Ch01	13958232	13964689	ID=SMEL_001g127830.1	Note=Protein of unknown function
SMEL3Ch01	13965492	13980425	ID=SMEL_001g127840.1	Note=Similar to AGO4A: Protein argonaute 4A (Oryza sativa subsp. japonica OX%3D39947)
SMEL3Ch01	13985302	13988455	ID=SMEL_001g127850.1	Note=Similar to AGO4A: Protein argonaute 4A (Oryza sativa subsp. japonica OX%3D39947)
SMEL3Ch01	14015970	14017383	ID=SMEL_001g127860.1	Note=Similar to TAD2: tRNA-specific adenosine deaminase TAD2 (Arabidopsis thaliana OX%3D3702)
SMEL3Ch01	14028875	14037384	ID=SMEL_001g127870.1	Note=Protein of unknown function
SMEL3Ch01	14064095	14065933	ID=SMEL_001g127880.1	Note=Protein of unknown function
SMEL3Ch01	14068165	14069805	ID=SMEL_001g127890.1	Note=Similar to AGO4: Protein argonaute 4 (Arabidopsis thaliana OX%3D3702)
SMEL3Ch01	14089294	14095780	ID=SMEL_001g127900.1	Note=Similar to ZIFL1: Protein ZINC INDUCED FACILITATOR-LIKE 1 (Arabidopsis thaliana OX%3D3702)
SMEL3Ch01	14102649	14121155	ID=SMEL_001g127910.1	Note=Similar to ZIFL1: Protein ZINC INDUCED FACILITATOR-LIKE 1 (Arabidopsis thaliana OX%3D3702)
SMEL3Ch01	14136413	14142231	ID=SMEL_001g127920.1	Note=Protein of unknown function
SMEL3Ch01	14145151	14147103	ID=SMEL_001g127930.1	Note=Similar to JJJ1: DNAJ protein JJJ1 homolog (Arabidopsis thaliana OX%3D3702)
SMEL3Ch01	14149404	14152741	ID=SMEL_001g127940.1	Note=Similar to PERK3: Proline-rich receptor-like protein kinase PERK3 (Arabidopsis thaliana OX%3D3702)
SMEL3Ch01	14157432	14166719	ID=SMEL_001g127950.1	Note=Similar to MAP65-5: 65-kDa microtubule-associated protein 5 (Arabidopsis thaliana OX%3D3702)
SMEL3Ch01	14167115	14170468	ID=SMEL_001g127960.1	Note=Similar to CYP98A2: Cytochrome P450 98A2 (Glycine max OX%3D3847)
SMEL3Ch01	14171679	14175878	ID=SMEL_001g127970.1	Note=Similar to MPH1: Protein MAINTENANCE OF PSII UNDER HIGH LIGHT 1 (Arabidopsis thaliana OX%3D3702)
SMEL3Ch01	14178032	14178529	ID=SMEL_001g127980.1	Note=Similar to ATL69: Putative RING-H2 finger protein ATL69 (Arabidopsis thaliana OX%3D3702)
SMEL3Ch01	14178792	14179796	ID=SMEL_001g127990.1	Note=Similar to SOT15: Cytosolic sulfotransferase 15 (Arabidopsis thaliana OX%3D3702)
SMEL3Ch01	14225492	14230029	ID=SMEL_001g128000.1	Note=Protein of unknown function
SMEL3Ch01	14231900	14237222	ID=SMEL_001g128010.1	Note=Similar to CFAP20: Cilia- and flagella-associated protein 20 (Chlamydomonas reinhardtii OX%3D3055)
SMEL3Ch01	14237278	14256477	ID=SMEL_001g128020.1	Note=Similar to THO1: THO complex subunit 1 (Arabidopsis thaliana OX%3D3702)
SMEL3Ch01	14258547	14261295	ID=SMEL_001g128030.1	Note=Protein of unknown function
SMEL3Ch01	14266093	14270770	ID=SMEL_001g128040.1	Note=Similar to RPS20A: 40S ribosomal protein S20-1 (Arabidopsis thaliana OX%3D3702)
SMEL3Ch01	14273841	14281964	ID=SMEL_001g128050.1	Note=Similar to At3g15140: Uncharacterized exonuclease domain-containing protein At3g15140 (Arabidopsis thaliana OX%3D3702)
SMEL3Ch01	14283648	14288749	ID=SMEL_001g128060.1	Note=Similar to CRSP: CO(2)-response secreted protease (Arabidopsis thaliana OX%3D3702)
SMEL3Ch01	14290005	14296060	ID=SMEL_001g128070.1	Note=Similar to PRMT3: Probable protein arginine N-methyltransferase 3 (Arabidopsis thaliana OX%3D3702)
SMEL3Ch01	14298774	14328565	ID=SMEL_001g128080.1	Note=Similar to PATROL1: Protein unc-13 homolog (Arabidopsis thaliana OX%3D3702)
SMEL3Ch01	14328949	14339342	ID=SMEL_001g128090.1	Note=Similar to CYP22: Peptidyl-prolyl cis-trans isomerase CYP22 (Arabidopsis thaliana OX%3D3702)
SMEL3Ch01	14342849	14343337	ID=SMEL_001g128100.1	Note=Similar to SIB2: Sigma factor binding protein 2%2C chloroplastic (Arabidopsis thaliana OX%3D3702)
SMEL3Ch01	14362494	14375719	ID=SMEL_001g128110.1	Note=Similar to LCBK1: Sphingoid long-chain bases kinase 1 (Arabidopsis thaliana OX%3D3702)
SMEL3Ch01	14378627	14396106	ID=SMEL_001g128120.1	Note=Similar to KEG: E3 ubiquitin-protein ligase KEG (Arabidopsis thaliana OX%3D3702)
SMEL3Ch01	14395746	14396021	ID=SMEL_001g128130.1	Note=Protein of unknown function
SMEL3Ch01	14398204	14401426	ID=SMEL_001g128140.1	Note=Similar to CITRX: Thioredoxin-like protein CITRX%2C chloroplastic (Solanum tuberosum OX%3D4113)
SMEL3Ch01	14402702	14405185	ID=SMEL_001g128150.1	Note=Similar to ASIL2: Trihelix transcription factor ASIL2 (Arabidopsis thaliana OX%3D3702)
SMEL3Ch01	14423680	14424615	ID=SMEL_001g128160.1	Note=Similar to PUB4: U-box domain-containing protein 4 (Arabidopsis thaliana OX%3D3702)
SMEL3Ch01	14427943	14430681	ID=SMEL_001g128170.1	Note=Similar to AED3: Aspartyl protease AED3 (Arabidopsis thaliana OX%3D3702)
SMEL3Ch01	14454102	14455847	ID=SMEL_001g128180.1	Note=Similar to PCMP-E48: Pentatricopeptide repeat-containing protein At2g21090 (Arabidopsis thaliana OX%3D3702)
SMEL3Ch01	14474383	14476760	ID=SMEL_001g128190.1	Note=Similar to NAD(P)H:quinone oxidoreductase (Solanum tuberosum OX%3D4113)
SMEL3Ch01	14488844	14489963	ID=SMEL_001g128200.1	Note=Similar to NAD(P)H:quinone oxidoreductase (Solanum tuberosum OX%3D4113)
SMEL3Ch01	14500555	14505100	ID=SMEL_001g128210.1	Note=Similar to PIP5K6: Phosphatidylinositol 4-phosphate 5-kinase 6 (Arabidopsis thaliana OX%3D3702)
SMEL3Ch01	14506392	14512598	ID=SMEL_001g128220.1	Note=Protein of unknown function
SMEL3Ch01	14513797	14540065	ID=SMEL_001g128230.1	Note=Similar to NRPE1: DNA-directed RNA polymerase V subunit 1 (Arabidopsis thaliana OX%3D3702)
SMEL3Ch01	14552076	14553200	ID=SMEL_001g128240.1	Note=Protein of unknown function
SMEL3Ch01	14564185	14565513	ID=SMEL_001g128250.1	Note=Similar to BHLH14: Transcription factor bHLH14 (Arabidopsis thaliana OX%3D3702)
SMEL3Ch01	14574819	14578394	ID=SMEL_001g128260.1	Note=Similar to ROPGAP3: Rho GTPase-activating protein 3 (Arabidopsis thaliana OX%3D3702)
SMEL3Ch01	14592068	14603047	ID=SMEL_001g128270.1	Note=Similar to CRK3: CDPK-related kinase 3 (Arabidopsis thaliana OX%3D3702)
SMEL3Ch01	14605235	14605579	ID=SMEL_001g128280.1	Note=Similar to SAUR32: Auxin-responsive protein SAUR32 (Arabidopsis thaliana OX%3D3702)
SMEL3Ch01	14633156	14634357	ID=SMEL_001g128290.1	Note=Similar to ATHB-7: Homeobox-leucine zipper protein ATHB-7 (Arabidopsis thaliana OX%3D3702)
SMEL3Ch01	14634531	14635076	ID=SMEL_001g128300.1	Note=Similar to ATHB-12: Homeobox-leucine zipper protein ATHB-12 (Arabidopsis thaliana OX%3D3702)
SMEL3Ch01	14639153	14644058	ID=SMEL_001g128310.1	Note=Similar to At1g16860: Uncharacterized membrane protein At1g16860 (Arabidopsis thaliana OX%3D3702)
SMEL3Ch01	14644565	14645835	ID=SMEL_001g128320.1	Note=Protein of unknown function
SMEL3Ch01	14648122	14653592	ID=SMEL_001g128330.1	Note=Similar to QQT1: GPN-loop GTPase QQT1 (Arabidopsis thaliana OX%3D3702)
SMEL3Ch01	14657198	14658646	ID=SMEL_001g128340.1	Note=Protein of unknown function
SMEL3Ch01	14662190	14665213	ID=SMEL_001g128350.1	Note=Similar to QQT1: GPN-loop GTPase QQT1 (Arabidopsis thaliana OX%3D3702)
SMEL3Ch01	14692038	14694667	ID=SMEL_001g128360.1	Note=Similar to CYP78A3: Cytochrome P450 78A3 (Glycine max OX%3D3847)
SMEL3Ch01	14708162	14709877	ID=SMEL_001g128370.1	Note=Similar to CYB5: Cytochrome b5 (Brassica oleracea var. botrytis OX%3D3715)
SMEL3Ch01	14718012	14719476	ID=SMEL_001g128380.1	Note=Protein of unknown function
SMEL3Ch01	14728232	14729215	ID=SMEL_001g128390.1	Note=Protein of unknown function
SMEL3Ch01	14730779	14734385	ID=SMEL_001g128400.1	Note=Protein of unknown function
SMEL3Ch01	14746633	14748108	ID=SMEL_001g128410.1	Note=Similar to At2g46620: AAA-ATPase At2g46620 (Arabidopsis thaliana OX%3D3702)
SMEL3Ch01	14750546	14753521	ID=SMEL_001g128420.1	Note=Similar to RABA3: Ras-related protein RABA3 (Arabidopsis thaliana OX%3D3702)
SMEL3Ch01	14757132	14758796	ID=SMEL_001g128430.1	Note=Similar to At5g16420: Pentatricopeptide repeat-containing protein At5g16420%2C mitochondrial (Arabidopsis thaliana OX%3D3702)
SMEL3Ch01	14763399	14771303	ID=SMEL_001g128440.1	Note=Similar to PUB44: U-box domain-containing protein 44 (Arabidopsis thaliana OX%3D3702)
SMEL3Ch01	14773664	14775340	ID=SMEL_001g128450.1	Note=Similar to PCMP-E20: Pentatricopeptide repeat-containing protein At5g08510 (Arabidopsis thaliana OX%3D3702)
SMEL3Ch01	14775678	14782821	ID=SMEL_001g128460.1	Note=Similar to LCA1: Calcium-transporting ATPase%2C endoplasmic reticulum-type (Solanum lycopersicum OX%3D4081)
SMEL3Ch01	14788196	14791926	ID=SMEL_001g128470.1	Note=Similar to RS31: Serine/arginine-rich splicing factor RS31 (Arabidopsis thaliana OX%3D3702)
SMEL3Ch01	14793158	14793490	ID=SMEL_001g128480.1	Note=Similar to KIC: Calcium-binding protein KIC (Arabidopsis thaliana OX%3D3702)
SMEL3Ch01	14795995	14797028	ID=SMEL_001g128490.1	Note=Similar to At4g27745: Protein yippee-like At4g27745 (Arabidopsis thaliana OX%3D3702)
SMEL3Ch01	14798190	14802882	ID=SMEL_001g128500.1	Note=Similar to WNK4: Probable serine/threonine-protein kinase WNK4 (Oryza sativa subsp. japonica OX%3D39947)
SMEL3Ch01	14805451	14814776	ID=SMEL_001g128510.1	Note=Similar to FKGP: Bifunctional fucokinase/fucose pyrophosphorylase (Arabidopsis thaliana OX%3D3702)
SMEL3Ch01	14829185	14830834	ID=SMEL_001g128520.1	Note=Protein of unknown function
SMEL3Ch01	14831442	14833664	ID=SMEL_001g128530.1	Note=Similar to ALMT10: Aluminum-activated malate transporter 10 (Arabidopsis thaliana OX%3D3702)
SMEL3Ch01	14843308	14850615	ID=SMEL_001g128540.1	Note=Protein of unknown function
SMEL3Ch01	14851435	14853217	ID=SMEL_001g128550.1	Note=Similar to DOF3.7: Dof zinc finger protein DOF3.7 (Arabidopsis thaliana OX%3D3702)
SMEL3Ch01	14862133	14862393	ID=SMEL_001g128560.1	Note=Protein of unknown function
SMEL3Ch01	14863574	14892533	ID=SMEL_001g128570.1	Note=Protein of unknown function
SMEL3Ch01	14908855	14916533	ID=SMEL_001g128580.1	Note=Protein of unknown function
SMEL3Ch01	14916883	14919039	ID=SMEL_001g128590.1	Note=Similar to At4g00950: Uncharacterized protein At4g00950 (Arabidopsis thaliana OX%3D3702)
SMEL3Ch01	14927837	14932264	ID=SMEL_001g128600.1	Note=Similar to ARF9: Auxin response factor 9 (Arabidopsis thaliana OX%3D3702)
SMEL3Ch01	14959613	14962540	ID=SMEL_001g128610.1	Note=Similar to CAS: Exportin-2 (Arabidopsis thaliana OX%3D3702)
SMEL3Ch01	14975981	14977771	ID=SMEL_001g128620.1	Note=Similar to MTB1: Transcription factor MTB1 (Solanum lycopersicum OX%3D4081)
SMEL3Ch01	15002269	15003723	ID=SMEL_001g128630.1	Note=Similar to APF2: Aspartyl protease family protein 2 (Arabidopsis thaliana OX%3D3702)
SMEL3Ch01	15003852	15004001	ID=SMEL_001g128640.1	Note=Protein of unknown function
SMEL3Ch01	15008904	15012832	ID=SMEL_001g128650.1	Note=Similar to At3g61800: UV-stimulated scaffold protein A homolog (Arabidopsis thaliana OX%3D3702)
SMEL3Ch01	15015741	15021124	ID=SMEL_001g128660.1	Note=Similar to SINAT5: E3 ubiquitin-protein ligase SINAT5 (Arabidopsis thaliana OX%3D3702)
SMEL3Ch01	15021466	15028681	ID=SMEL_001g128670.1	Note=Protein of unknown function
SMEL3Ch01	15031075	15031680	ID=SMEL_001g128680.1	Note=Protein of unknown function
SMEL3Ch01	15033041	15036823	ID=SMEL_001g128690.1	Note=Similar to PI4KG4: Phosphatidylinositol 4-kinase gamma 4 (Arabidopsis thaliana OX%3D3702)
SMEL3Ch01	15038894	15044722	ID=SMEL_001g128700.1	Note=Protein of unknown function
SMEL3Ch01	15048252	15062789	ID=SMEL_001g128710.1	Note=Similar to Dynamin-related protein 5A (Glycine max OX%3D3847)
SMEL3Ch01	15072311	15075667	ID=SMEL_001g128720.1	Note=Similar to WSD1: O-acyltransferase WSD1 (Arabidopsis thaliana OX%3D3702)
SMEL3Ch01	15089448	15092480	ID=SMEL_001g128730.1	Note=Similar to WSD1: O-acyltransferase WSD1 (Arabidopsis thaliana OX%3D3702)
SMEL3Ch01	15100605	15105641	ID=SMEL_001g128740.1	Note=Protein of unknown function
SMEL3Ch01	15111753	15116799	ID=SMEL_001g128750.1	Note=Similar to WSD1: O-acyltransferase WSD1 (Arabidopsis thaliana OX%3D3702)
SMEL3Ch01	15120485	15122525	ID=SMEL_001g128760.1	Note=Protein of unknown function
SMEL3Ch01	15124264	15126038	ID=SMEL_001g128770.1	Note=Similar to At3g61750: Cytochrome b561 and DOMON domain-containing protein At3g61750 (Arabidopsis thaliana OX%3D3702)
SMEL3Ch01	15126798	15143303	ID=SMEL_001g128780.1	Note=Similar to TSS: Protein TSS (Arabidopsis thaliana OX%3D3702)
SMEL3Ch01	15156240	15171617	ID=SMEL_001g128790.1	Note=Similar to ATX3: Histone-lysine N-methyltransferase ATX3 (Arabidopsis thaliana OX%3D3702)
SMEL3Ch01	15173007	15173558	ID=SMEL_001g128800.1	Note=Similar to At1g50680: AP2/ERF and B3 domain-containing transcription factor At1g50680 (Arabidopsis thaliana OX%3D3702)
SMEL3Ch01	15183033	15183632	ID=SMEL_001g128810.1	Note=Similar to ARF70: B3 domain-containing protein At2g31720 (Arabidopsis thaliana OX%3D3702)
SMEL3Ch01	15184783	15194152	ID=SMEL_001g128820.1	Note=Similar to RMF: Probable F-box protein At3g61730 (Arabidopsis thaliana OX%3D3702)
SMEL3Ch01	15202028	15203695	ID=SMEL_001g128830.1	Note=Similar to ATL22: RING-H2 finger protein ATL22 (Arabidopsis thaliana OX%3D3702)
SMEL3Ch01	15213528	15218947	ID=SMEL_001g128840.1	Note=Similar to ATL21A: Putative RING-H2 finger protein ATL21A (Arabidopsis thaliana OX%3D3702)
SMEL3Ch01	15223684	15225154	ID=SMEL_001g128850.1	Note=Similar to ATL21A: Putative RING-H2 finger protein ATL21A (Arabidopsis thaliana OX%3D3702)
SMEL3Ch01	15225301	15229286	ID=SMEL_001g128860.1	Note=Similar to ATO: Splicing factor SF3a60 homolog (Arabidopsis thaliana OX%3D3702)
SMEL3Ch01	15233712	15234053	ID=SMEL_001g128870.1	Note=Similar to Non-specific lipid-transfer protein (Ambrosia artemisiifolia OX%3D4212)
SMEL3Ch01	15236041	15242782	ID=SMEL_001g128880.1	Note=Similar to CNGC1: Cyclic nucleotide-gated ion channel 1 (Arabidopsis thaliana OX%3D3702)
SMEL3Ch01	15243116	15244468	ID=SMEL_001g128890.1	Note=Similar to UGT94E5: Beta-D-glucosyl crocetin beta-1%2C6-glucosyltransferase (Gardenia jasminoides OX%3D114476)
SMEL3Ch01	15249325	15258047	ID=SMEL_001g128900.1	Note=Similar to LACS4: Long chain acyl-CoA synthetase 4 (Arabidopsis thaliana OX%3D3702)
SMEL3Ch01	15259091	15266911	ID=SMEL_001g128910.1	Note=Similar to RH31: DEAD-box ATP-dependent RNA helicase 31 (Arabidopsis thaliana OX%3D3702)
SMEL3Ch01	15268466	15274040	ID=SMEL_001g128920.1	Note=Protein of unknown function
SMEL3Ch01	15604983	15610538	ID=SMEL_001g128930.1	Note=Similar to SNRNP59: U11/U12 small nuclear ribonucleoprotein 59 kDa protein (Arabidopsis thaliana OX%3D3702)
SMEL3Ch01	15616351	15617247	ID=SMEL_001g128940.1	Note=Protein of unknown function
SMEL3Ch01	15620488	15621384	ID=SMEL_001g128950.1	Note=Similar to Acidic endochitinase (Nicotiana tabacum OX%3D4097)
SMEL3Ch01	15623151	15623357	ID=SMEL_001g128960.1	Note=Similar to Acidic endochitinase (Cucumis sativus OX%3D3659)
SMEL3Ch01	15623361	15624062	ID=SMEL_001g128970.1	Note=Similar to Acidic endochitinase (Nicotiana tabacum OX%3D4097)
SMEL3Ch01	15632515	15633939	ID=SMEL_001g128980.1	Note=Similar to At5g24010: Probable receptor-like protein kinase At5g24010 (Arabidopsis thaliana OX%3D3702)
SMEL3Ch01	15641840	15646337	ID=SMEL_001g128990.1	Note=Similar to FRO2: Ferric reduction oxidase 2 (Arabidopsis thaliana OX%3D3702)
SMEL3Ch01	15651788	15655419	ID=SMEL_001g129000.1	Note=Similar to FRO2: Ferric reduction oxidase 2 (Arabidopsis thaliana OX%3D3702)
SMEL3Ch01	15659973	15667754	ID=SMEL_001g129010.1	Note=Similar to FRO2: Ferric reduction oxidase 2 (Arabidopsis thaliana OX%3D3702)
SMEL3Ch01	15667915	15686745	ID=SMEL_001g129020.1	Note=Protein of unknown function
SMEL3Ch01	15689270	15692168	ID=SMEL_001g129030.1	Note=Protein of unknown function
SMEL3Ch01	15713778	15718921	ID=SMEL_001g129040.1	Note=Similar to FAS4: ATP-dependent RNA helicase DEAH13 (Arabidopsis thaliana OX%3D3702)
SMEL3Ch01	15721197	15727035	ID=SMEL_001g129050.1	Note=Similar to FAS4: ATP-dependent RNA helicase DEAH13 (Arabidopsis thaliana OX%3D3702)
SMEL3Ch01	15739479	15741487	ID=SMEL_001g129060.1	Note=Similar to PYL8: Abscisic acid receptor PYL8 (Arabidopsis thaliana OX%3D3702)
SMEL3Ch01	15743574	15746372	ID=SMEL_001g129070.1	Note=Similar to PCMP-H65: Pentatricopeptide repeat-containing protein At4g01030%2C mitochondrial (Arabidopsis thaliana OX%3D3702)
SMEL3Ch01	15750570	15752186	ID=SMEL_001g129080.1	Note=Similar to At4g01037: Protein WHAT'S THIS FACTOR 1 homolog%2C chloroplastic (Arabidopsis thaliana OX%3D3702)
SMEL3Ch01	15754660	15759822	ID=SMEL_001g129090.1	Note=Similar to STR4: Rhodanese-like domain-containing protein 4%2C chloroplastic (Arabidopsis thaliana OX%3D3702)
SMEL3Ch01	15760862	15766096	ID=SMEL_001g129100.1	Note=Similar to HTR12: Histone H3-like centromeric protein HTR12 (Arabidopsis thaliana OX%3D3702)
SMEL3Ch01	15767005	15768039	ID=SMEL_001g129110.1	Note=Similar to TRY: Transcription factor TRY (Arabidopsis thaliana OX%3D3702)
SMEL3Ch01	15787457	15789449	ID=SMEL_001g129120.1	Note=Similar to WRKY41: Probable WRKY transcription factor 41 (Arabidopsis thaliana OX%3D3702)
SMEL3Ch01	15807251	15808678	ID=SMEL_001g129130.1	Note=Similar to AS: Hydroquinone glucosyltransferase (Rauvolfia serpentina OX%3D4060)
SMEL3Ch01	15822487	15825805	ID=SMEL_001g129140.1	Note=Similar to TBL25: Protein trichome birefringence-like 25 (Arabidopsis thaliana OX%3D3702)
SMEL3Ch01	15835977	15838801	ID=SMEL_001g129150.1	Note=Similar to PCMP-E92: Putative pentatricopeptide repeat-containing protein At3g18840 (Arabidopsis thaliana OX%3D3702)
SMEL3Ch01	15838892	15844394	ID=SMEL_001g129160.1	Note=Similar to EDR4: Protein ENHANCED DISEASE RESISTANCE 4 (Arabidopsis thaliana OX%3D3702)
SMEL3Ch01	15856229	15856615	ID=SMEL_001g129170.1	Note=Protein of unknown function
SMEL3Ch01	15858174	15861862	ID=SMEL_001g129180.1	Note=Similar to JAR4: Jasmonoyl--L-amino acid synthetase JAR4 (Nicotiana attenuata OX%3D49451)
SMEL3Ch01	15889528	15895777	ID=SMEL_001g129190.1	Note=Similar to ADNT1: Mitochondrial adenine nucleotide transporter ADNT1 (Arabidopsis thaliana OX%3D3702)
SMEL3Ch01	15896030	15896859	ID=SMEL_001g129200.1	Note=Protein of unknown function
SMEL3Ch01	15901051	15904394	ID=SMEL_001g129210.1	Note=Similar to PHY1: Light-sensor Protein kinase (Ceratodon purpureus OX%3D3225)
SMEL3Ch01	15905216	15913894	ID=SMEL_001g129220.1	Note=Similar to At5g41760: CMP-sialic acid transporter 1 (Arabidopsis thaliana OX%3D3702)
SMEL3Ch01	15913721	15913837	ID=SMEL_001g129230.1	Note=Protein of unknown function
SMEL3Ch01	15915290	15915559	ID=SMEL_001g129240.1	Note=Protein of unknown function
SMEL3Ch01	15926714	15927042	ID=SMEL_001g129250.1	Note=Similar to AGP20: Arabinogalactan protein 20 (Arabidopsis thaliana OX%3D3702)
SMEL3Ch01	15927284	15934337	ID=SMEL_001g129260.1	Note=Similar to MTM1: Mitochondrial carrier protein MTM1 (Arabidopsis thaliana OX%3D3702)
SMEL3Ch01	15942998	15943882	ID=SMEL_001g129270.1	Note=Similar to CRF4: Ethylene-responsive transcription factor CRF4 (Arabidopsis thaliana OX%3D3702)
SMEL3Ch01	15951007	15955846	ID=SMEL_001g129280.1	Note=Similar to UBC9: SUMO-conjugating enzyme UBC9 (Arabidopsis thaliana OX%3D3702)
SMEL3Ch01	15959165	15966767	ID=SMEL_001g129290.1	Note=Similar to RRP41: Exosome complex component RRP41 homolog (Arabidopsis thaliana OX%3D3702)
SMEL3Ch01	15966943	15973127	ID=SMEL_001g129300.1	Note=Similar to Putative glucose-6-phosphate 1-epimerase (Cenchrus ciliaris OX%3D35872)
SMEL3Ch01	15986093	15993926	ID=SMEL_001g129310.1	Note=Similar to TAF1: Transcriptional activator TAF-1 (Fragment) (Nicotiana tabacum OX%3D4097)
SMEL3Ch01	16009266	16012738	ID=SMEL_001g129320.1	Note=Similar to At4g01130: GDSL esterase/lipase At4g01130 (Arabidopsis thaliana OX%3D3702)
SMEL3Ch01	16013997	16014755	ID=SMEL_001g129330.1	Note=Protein of unknown function
SMEL3Ch01	16019241	16022885	ID=SMEL_001g129340.1	Note=Similar to CURT1A: Protein CURVATURE THYLAKOID 1A%2C chloroplastic (Arabidopsis thaliana OX%3D3702)
SMEL3Ch01	16026604	16028184	ID=SMEL_001g129350.1	Note=Similar to Eukaryotic translation initiation factor 1A (Onobrychis viciifolia OX%3D3882)
SMEL3Ch01	16030399	16036849	ID=SMEL_001g129360.1	Note=Similar to POB1: BTB/POZ domain-containing protein POB1 (Arabidopsis thaliana OX%3D3702)
SMEL3Ch01	16039146	16042641	ID=SMEL_001g129370.1	Note=Similar to At5g41620: Uncharacterized protein At5g41620 (Arabidopsis thaliana OX%3D3702)
SMEL3Ch01	16048250	16049467	ID=SMEL_001g129380.1	Note=Similar to At3g61590: F-box/kelch-repeat protein At3g61590 (Arabidopsis thaliana OX%3D3702)
SMEL3Ch01	16085031	16085840	ID=SMEL_001g129390.1	Note=Similar to BAP2: BON1-associated protein 2 (Arabidopsis thaliana OX%3D3702)
SMEL3Ch01	16086970	16087626	ID=SMEL_001g129400.1	Note=Protein of unknown function
SMEL3Ch01	16087978	16093162	ID=SMEL_001g129410.1	Note=Similar to BAG6: BAG family molecular chaperone regulator 6 (Arabidopsis thaliana OX%3D3702)
SMEL3Ch01	16094133	16095038	ID=SMEL_001g129420.1	Note=Similar to CHIT3: Acidic endochitinase (Vitis vinifera OX%3D29760)
SMEL3Ch01	16095367	16106868	ID=SMEL_001g129430.1	Note=Protein of unknown function
SMEL3Ch01	16114524	16119282	ID=SMEL_001g129440.1	Note=Similar to MGP4: UDP-D-xylose:L-fucose alpha-1%2C3-D-xylosyltransferase MGP4 (Arabidopsis thaliana OX%3D3702)
SMEL3Ch01	16121330	16127513	ID=SMEL_001g129450.1	Note=Similar to ABIL1: Protein ABIL1 (Arabidopsis thaliana OX%3D3702)
SMEL3Ch01	16131193	16134170	ID=SMEL_001g129460.1	Note=Protein of unknown function
SMEL3Ch01	16183435	16203200	ID=SMEL_001g129470.1	Note=Similar to GC4: Golgin candidate 4 (Arabidopsis thaliana OX%3D3702)
SMEL3Ch01	16203720	16206956	ID=SMEL_001g129480.1	Note=Similar to RTNLB5: Reticulon-like protein B5 (Arabidopsis thaliana OX%3D3702)
SMEL3Ch01	16212682	16216704	ID=SMEL_001g129490.1	Note=Similar to ERD3: Probable methyltransferase PMT21 (Arabidopsis thaliana OX%3D3702)
SMEL3Ch01	16217702	16218478	ID=SMEL_001g129500.1	Note=Similar to ATL68: RING-H2 finger protein ATL68 (Arabidopsis thaliana OX%3D3702)
SMEL3Ch01	16257212	16257892	ID=SMEL_001g129510.1	Note=Similar to At1g64065: Late embryogenesis abundant protein At1g64065 (Arabidopsis thaliana OX%3D3702)
SMEL3Ch01	16259707	16261794	ID=SMEL_001g129520.1	Note=Similar to PCMP-H5: Pentatricopeptide repeat-containing protein At4g37170 (Arabidopsis thaliana OX%3D3702)
SMEL3Ch01	16263114	16265666	ID=SMEL_001g129530.1	Note=Similar to Desiccation protectant protein Lea14 homolog (Glycine max OX%3D3847)
SMEL3Ch01	16269883	16271173	ID=SMEL_001g129540.1	Note=Similar to Desiccation protectant protein Lea14 homolog (Glycine max OX%3D3847)
SMEL3Ch01	16283101	16293615	ID=SMEL_001g129550.1	Note=Protein of unknown function
SMEL3Ch01	16296122	16298398	ID=SMEL_001g129560.1	Note=Similar to At3g61520: Pentatricopeptide repeat-containing protein At3g61520%2C mitochondrial (Arabidopsis thaliana OX%3D3702)
SMEL3Ch01	16301160	16303004	ID=SMEL_001g129570.1	Note=Similar to WRKY22: WRKY transcription factor 22 (Arabidopsis thaliana OX%3D3702)
SMEL3Ch01	16318438	16326586	ID=SMEL_001g129580.1	Note=Protein of unknown function
SMEL3Ch01	16357344	16360097	ID=SMEL_001g129590.1	Note=Similar to ACS2: 1-aminocyclopropane-1-carboxylate synthase 2 (Solanum lycopersicum OX%3D4081)
SMEL3Ch01	16376947	16379408	ID=SMEL_001g129600.1	Note=Similar to HIPP39: Heavy metal-associated isoprenylated plant protein 39 (Arabidopsis thaliana OX%3D3702)
SMEL3Ch01	16385756	16391154	ID=SMEL_001g129610.1	Note=Similar to At1g01500: Uncharacterized protein At1g01500 (Arabidopsis thaliana OX%3D3702)
SMEL3Ch01	16401359	16403291	ID=SMEL_001g129620.1	Note=Protein of unknown function
SMEL3Ch01	16706836	16717353	ID=SMEL_001g129630.1	Note=Protein of unknown function
SMEL3Ch01	16717937	16721850	ID=SMEL_001g129640.1	Note=Similar to PCMP-E39: Pentatricopeptide repeat-containing protein At2g46050%2C mitochondrial (Arabidopsis thaliana OX%3D3702)
SMEL3Ch01	16722008	16725825	ID=SMEL_001g129650.1	Note=Similar to RHB1A: Probable E3 ubiquitin-protein ligase RHB1A (Arabidopsis thaliana OX%3D3702)
SMEL3Ch01	16729213	16729883	ID=SMEL_001g129660.1	Note=Similar to SD22: G-type lectin S-receptor-like serine/threonine-protein kinase SD2-2 (Arabidopsis thaliana OX%3D3702)
SMEL3Ch01	16737407	16742353	ID=SMEL_001g129670.1	Note=Protein of unknown function
SMEL3Ch01	16748743	16764596	ID=SMEL_001g129680.1	Note=Similar to ARID1: AT-rich interactive domain-containing protein 1 (Arabidopsis thaliana OX%3D3702)
SMEL3Ch01	16769705	16773606	ID=SMEL_001g129690.1	Note=Similar to UBC5: Ubiquitin-conjugating enzyme E2 5 (Arabidopsis thaliana OX%3D3702)
SMEL3Ch01	16773743	16786981	ID=SMEL_001g129700.1	Note=Similar to BRM: ATP-dependent helicase BRM (Arabidopsis thaliana OX%3D3702)
SMEL3Ch01	16793804	16796363	ID=SMEL_001g129710.1	Note=Similar to PCAS-2: Bifunctional L-3-cyanoalanine synthase/cysteine synthase 2%2C mitochondrial (Solanum tuberosum OX%3D4113)
SMEL3Ch01	16803364	16806167	ID=SMEL_001g129720.1	Note=Protein of unknown function
SMEL3Ch01	16811652	16816649	ID=SMEL_001g129730.1	Note=Similar to ATI1: ATG8-interacting protein 1 (Arabidopsis thaliana OX%3D3702)
SMEL3Ch01	16817832	16822124	ID=SMEL_001g129740.1	Note=Similar to ORC5: Origin of replication complex subunit 5 (Arabidopsis thaliana OX%3D3702)
SMEL3Ch01	16826220	16827776	ID=SMEL_001g129750.1	Note=Similar to CYP86A22: Cytochrome P450 86A22 (Petunia hybrida OX%3D4102)
SMEL3Ch01	16829031	16836899	ID=SMEL_001g129760.1	Note=Similar to PHT4%3B4: Ascorbate transporter%2C chloroplastic (Arabidopsis thaliana OX%3D3702)
SMEL3Ch01	16841456	16844310	ID=SMEL_001g129770.1	Note=Similar to GPAT4: Glycerol-3-phosphate 2-O-acyltransferase 4 (Arabidopsis thaliana OX%3D3702)
SMEL3Ch01	16850395	16853698	ID=SMEL_001g129780.1	Note=Similar to PIP1-2: Probable aquaporin PIP1-2 (Oryza sativa subsp. japonica OX%3D39947)
SMEL3Ch01	16868243	16884468	ID=SMEL_001g129790.1	Note=Similar to SPPL4: Signal peptide peptidase-like 4 (Arabidopsis thaliana OX%3D3702)
SMEL3Ch01	16885820	16886164	ID=SMEL_001g129800.1	Note=Protein of unknown function
SMEL3Ch01	16894079	16902615	ID=SMEL_001g129810.1	Note=Similar to PUB33: U-box domain-containing protein 33 (Arabidopsis thaliana OX%3D3702)
SMEL3Ch01	16908572	16913950	ID=SMEL_001g129820.1	Note=Similar to PAIR1: Protein PAIR1 (Oryza sativa subsp. japonica OX%3D39947)
SMEL3Ch01	16929323	16934278	ID=SMEL_001g129830.1	Note=Similar to TRM32: Protein TRM32 (Arabidopsis thaliana OX%3D3702)
SMEL3Ch01	16935322	16940443	ID=SMEL_001g129840.1	Note=Protein of unknown function
SMEL3Ch01	16960804	16968699	ID=SMEL_001g129850.1	Note=Similar to At1g65750: Putative ribonuclease H protein At1g65750 (Arabidopsis thaliana OX%3D3702)
SMEL3Ch01	16974051	16984731	ID=SMEL_001g129860.1	Note=Similar to MED12: Mediator of RNA polymerase II transcription subunit 12 (Arabidopsis thaliana OX%3D3702)
SMEL3Ch01	16986958	16989111	ID=SMEL_001g129870.1	Note=Similar to ROPGEF2: Rop guanine nucleotide exchange factor 2 (Arabidopsis thaliana OX%3D3702)
SMEL3Ch01	16996616	16998505	ID=SMEL_001g129880.1	Note=Similar to EMB2758: Pentatricopeptide repeat-containing protein At4g33990 (Arabidopsis thaliana OX%3D3702)
SMEL3Ch01	17005457	17007306	ID=SMEL_001g129890.1	Note=Similar to At5g51310: Gibberellin 20-oxidase-like protein (Arabidopsis thaliana OX%3D3702)
SMEL3Ch01	17011048	17022439	ID=SMEL_001g129900.1	Note=Similar to BAM7: Beta-amylase 7 (Arabidopsis thaliana OX%3D3702)
SMEL3Ch01	17011083	17011475	ID=SMEL_001g129910.1	Note=Protein of unknown function
SMEL3Ch01	17019417	17025530	ID=SMEL_001g129920.1	Note=Protein of unknown function
SMEL3Ch01	17026240	17028915	ID=SMEL_001g129930.1	Note=Similar to RPL36B: 60S ribosomal protein L36-2 (Arabidopsis thaliana OX%3D3702)
SMEL3Ch01	17040547	17064547	ID=SMEL_001g129940.1	Note=Protein of unknown function
SMEL3Ch01	17065850	17069371	ID=SMEL_001g129950.1	Note=Protein of unknown function
SMEL3Ch01	17071601	17081303	ID=SMEL_001g129960.1	Note=Protein of unknown function
SMEL3Ch01	17082318	17085392	ID=SMEL_001g129970.1	Note=Similar to SKIP4: F-box/kelch-repeat protein SKIP4 (Arabidopsis thaliana OX%3D3702)
SMEL3Ch01	17085929	17088134	ID=SMEL_001g129980.1	Note=Protein of unknown function
SMEL3Ch01	17106680	17109523	ID=SMEL_001g129990.1	Note=Protein of unknown function
SMEL3Ch01	17117753	17124460	ID=SMEL_001g130000.1	Note=Similar to At5g59250: D-xylose-proton symporter-like 3%2C chloroplastic (Arabidopsis thaliana OX%3D3702)
SMEL3Ch01	17143545	17146101	ID=SMEL_001g130010.1	Note=Similar to PYRD: Riboflavin biosynthesis protein PYRD%2C chloroplastic (Arabidopsis thaliana OX%3D3702)
SMEL3Ch01	17146459	17150049	ID=SMEL_001g130020.1	Note=Similar to AAA1: Katanin p60 ATPase-containing subunit A1 (Arabidopsis thaliana OX%3D3702)
SMEL3Ch01	17150539	17153002	ID=SMEL_001g130030.1	Note=Similar to PLIM2B: LIM domain-containing protein PLIM2b (Arabidopsis thaliana OX%3D3702)
SMEL3Ch01	17156234	17156560	ID=SMEL_001g130040.1	Note=Protein of unknown function
SMEL3Ch01	17157036	17164235	ID=SMEL_001g130050.1	Note=Protein of unknown function
SMEL3Ch01	17166045	17170348	ID=SMEL_001g130060.1	Note=Similar to CAC3: Acetyl-coenzyme A carboxylase carboxyl transferase subunit alpha%2C chloroplastic (Arabidopsis thaliana OX%3D3702)
SMEL3Ch01	17172794	17174891	ID=SMEL_001g130070.1	Note=Similar to RF9: Probable disease resistance protein RF9 (Arabidopsis thaliana OX%3D3702)
SMEL3Ch01	17179831	17196249	ID=SMEL_001g130080.1	Note=Similar to RH8: DEAD-box ATP-dependent RNA helicase 8 (Arabidopsis thaliana OX%3D3702)
SMEL3Ch01	17204392	17206869	ID=SMEL_001g130090.1	Note=Similar to MYB17: Transcription factor MYB17 (Arabidopsis thaliana OX%3D3702)
SMEL3Ch01	17207142	17211620	ID=SMEL_001g130100.1	Note=Similar to Remorin (Solanum tuberosum OX%3D4113)
SMEL3Ch01	17221021	17227519	ID=SMEL_001g130110.1	Note=Protein of unknown function
SMEL3Ch01	17228341	17229810	ID=SMEL_001g130120.1	Note=Similar to ADF12: Actin-depolymerizing factor 12 (Arabidopsis thaliana OX%3D3702)
SMEL3Ch01	17237361	17240390	ID=SMEL_001g130130.1	Note=Similar to FTIP3: FT-interacting protein 3 (Arabidopsis thaliana OX%3D3702)
SMEL3Ch01	17241286	17241855	ID=SMEL_001g130140.1	Note=Similar to Os02g0637000: Putative ripening-related protein 2 (Oryza sativa subsp. japonica OX%3D39947)
SMEL3Ch01	17243204	17243773	ID=SMEL_001g130150.1	Note=Similar to Os02g0637000: Putative ripening-related protein 2 (Oryza sativa subsp. japonica OX%3D39947)
SMEL3Ch01	17244764	17248113	ID=SMEL_001g130160.1	Note=Protein of unknown function
SMEL3Ch01	17250638	17257330	ID=SMEL_001g130170.1	Note=Similar to AHL9: AT-hook motif nuclear-localized protein 9 (Arabidopsis thaliana OX%3D3702)
SMEL3Ch01	17263654	17264613	ID=SMEL_001g130180.1	Note=Protein of unknown function
SMEL3Ch01	17266575	17275043	ID=SMEL_001g130190.1	Note=Similar to PRL1: Protein pleiotropic regulatory locus 1 (Arabidopsis thaliana OX%3D3702)
SMEL3Ch01	17276595	17277245	ID=SMEL_001g130200.1	Note=Similar to NAP2: NAC domain-containing protein 2 (Solanum lycopersicum OX%3D4081)
SMEL3Ch01	17282799	17296212	ID=SMEL_001g130210.1	Note=Similar to KEA2: K(+) efflux antiporter 2%2C chloroplastic (Arabidopsis thaliana OX%3D3702)
SMEL3Ch01	17296652	17300411	ID=SMEL_001g130220.1	Note=Similar to FOLD4: Bifunctional protein FolD 4%2C chloroplastic (Arabidopsis thaliana OX%3D3702)
SMEL3Ch01	17300581	17303624	ID=SMEL_001g130230.1	Note=Similar to MNR1: (+)-neomenthol dehydrogenase (Capsicum annuum OX%3D4072)
SMEL3Ch01	17304872	17314212	ID=SMEL_001g130240.1	Note=Similar to MNR1: (+)-neomenthol dehydrogenase (Capsicum annuum OX%3D4072)
SMEL3Ch01	17317652	17320007	ID=SMEL_001g130250.1	Note=Similar to SDR1: (+)-neomenthol dehydrogenase (Arabidopsis thaliana OX%3D3702)
SMEL3Ch01	17322789	17325455	ID=SMEL_001g130260.1	Note=Similar to SDR1: (+)-neomenthol dehydrogenase (Arabidopsis thaliana OX%3D3702)
SMEL3Ch01	17333133	17334891	ID=SMEL_001g130270.1	Note=Protein of unknown function
SMEL3Ch01	17344342	17357625	ID=SMEL_001g130280.1	Note=Similar to NAD-dependent malic enzyme 59 kDa isoform%2C mitochondrial (Solanum tuberosum OX%3D4113)
SMEL3Ch01	17362166	17366981	ID=SMEL_001g130290.1	Note=Protein of unknown function
SMEL3Ch01	17367867	17372182	ID=SMEL_001g130300.1	Note=Protein of unknown function
SMEL3Ch01	17377203	17382826	ID=SMEL_001g130310.1	Note=Similar to DGD2: Digalactosyldiacylglycerol synthase 2%2C chloroplastic (Lotus japonicus OX%3D34305)
SMEL3Ch01	17388441	17389100	ID=SMEL_001g130320.1	Note=Similar to RMA1H1: E3 ubiquitin-protein ligase RMA1H1 (Capsicum annuum OX%3D4072)
SMEL3Ch01	17392370	17392792	ID=SMEL_001g130330.1	Note=Protein of unknown function
SMEL3Ch01	17488314	17499393	ID=SMEL_001g130340.1	Note=Similar to FIGL1: ATPase family AAA domain-containing protein FIGL1 (Arabidopsis thaliana OX%3D3702)
SMEL3Ch01	17501728	17504499	ID=SMEL_001g130350.1	Note=Similar to CYP704C1: Cytochrome P450 704C1 (Pinus taeda OX%3D3352)
SMEL3Ch01	17505588	17508051	ID=SMEL_001g130360.1	Note=Similar to CYP704C1: Cytochrome P450 704C1 (Pinus taeda OX%3D3352)
SMEL3Ch01	17509570	17512852	ID=SMEL_001g130370.1	Note=Similar to REV: Homeobox-leucine zipper protein REVOLUTA (Arabidopsis thaliana OX%3D3702)
SMEL3Ch01	17513837	17514265	ID=SMEL_001g130380.1	Note=Similar to CYP704C1: Cytochrome P450 704C1 (Pinus taeda OX%3D3352)
SMEL3Ch01	17515259	17525952	ID=SMEL_001g130390.1	Note=Similar to CHY1: 3-hydroxyisobutyryl-CoA hydrolase 1 (Arabidopsis thaliana OX%3D3702)
SMEL3Ch01	17533857	17535349	ID=SMEL_001g130400.1	Note=Similar to FA18: 13S globulin seed storage protein 2 (Fagopyrum esculentum OX%3D3617)
SMEL3Ch01	17537234	17539583	ID=SMEL_001g130410.1	Note=Similar to CYP704C1: Cytochrome P450 704C1 (Pinus taeda OX%3D3352)
SMEL3Ch01	17595141	17596302	ID=SMEL_001g130420.1	Note=Similar to CYP704C1: Cytochrome P450 704C1 (Pinus taeda OX%3D3352)
SMEL3Ch01	17630593	17631175	ID=SMEL_001g130430.1	Note=Similar to SOT16: Cytosolic sulfotransferase 16 (Arabidopsis thaliana OX%3D3702)
SMEL3Ch01	17638268	17640891	ID=SMEL_001g130440.1	Note=Similar to CYP94B3: Cytochrome P450 94B3 (Arabidopsis thaliana OX%3D3702)
SMEL3Ch01	17646242	17648871	ID=SMEL_001g130450.1	Note=Similar to CYP704C1: Cytochrome P450 704C1 (Pinus taeda OX%3D3352)
SMEL3Ch01	17649420	17695899	ID=SMEL_001g130460.1	Note=Similar to BCHC2: BEACH domain-containing protein C2 (Arabidopsis thaliana OX%3D3702)
SMEL3Ch01	17700356	17703656	ID=SMEL_001g130470.1	Note=Similar to Blue copper protein (Pisum sativum OX%3D3888)
SMEL3Ch01	17704597	17720421	ID=SMEL_001g130480.1	Note=Similar to SYT4: Synaptotagmin-4 (Arabidopsis thaliana OX%3D3702)
SMEL3Ch01	17730762	17734457	ID=SMEL_001g130490.1	Note=Similar to At2g45590: Receptor-like serine/threonine-protein kinase At2g45590 (Arabidopsis thaliana OX%3D3702)
SMEL3Ch01	17742790	17743930	ID=SMEL_001g130500.1	Note=Similar to CXE8: Probable carboxylesterase 8 (Arabidopsis thaliana OX%3D3702)
SMEL3Ch01	17745486	17747167	ID=SMEL_001g130510.1	Note=Similar to UGT74F2: UDP-glycosyltransferase 74F2 (Arabidopsis thaliana OX%3D3702)
SMEL3Ch01	17755967	17762687	ID=SMEL_001g130520.1	Note=Similar to URT1: UTP:RNA uridylyltransferase 1 (Arabidopsis thaliana OX%3D3702)
SMEL3Ch01	17762874	17768857	ID=SMEL_001g130530.1	Note=Similar to HPR3: Glyoxylate/hydroxypyruvate reductase HPR3 (Arabidopsis thaliana OX%3D3702)
SMEL3Ch01	17769144	17771428	ID=SMEL_001g130540.1	Note=Similar to HPR3: Glyoxylate/hydroxypyruvate reductase HPR3 (Arabidopsis thaliana OX%3D3702)
SMEL3Ch01	17782971	17785201	ID=SMEL_001g130550.1	Note=Similar to GA20OX1: Gibberellin 20 oxidase 1 (Arabidopsis thaliana OX%3D3702)
SMEL3Ch01	17793346	17800703	ID=SMEL_001g130560.1	Note=Similar to GAUT1: Polygalacturonate 4-alpha-galacturonosyltransferase (Arabidopsis thaliana OX%3D3702)
SMEL3Ch01	17820373	17827286	ID=SMEL_001g130570.1	Note=Similar to MADS3: Agamous-like MADS-box protein MADS3 (Vitis vinifera OX%3D29760)
SMEL3Ch01	17831553	17832650	ID=SMEL_001g130580.1	Note=Similar to SOC1: MADS-box protein SOC1 (Arabidopsis thaliana OX%3D3702)
SMEL3Ch01	17844451	17844636	ID=SMEL_001g130590.1	Note=Similar to SOC1: MADS-box protein SOC1 (Arabidopsis thaliana OX%3D3702)
SMEL3Ch01	17867757	17872632	ID=SMEL_001g130600.1	Note=Similar to SOC1: MADS-box protein SOC1 (Arabidopsis thaliana OX%3D3702)
SMEL3Ch01	17878644	17897933	ID=SMEL_001g130610.1	Note=Similar to LPEAT2: Lysophospholipid acyltransferase LPEAT2 (Arabidopsis thaliana OX%3D3702)
SMEL3Ch01	17904857	17910387	ID=SMEL_001g130620.1	Note=Similar to At4g31010: CRS2-associated factor 1%2C mitochondrial (Arabidopsis thaliana OX%3D3702)
SMEL3Ch01	17912602	17916240	ID=SMEL_001g130630.1	Note=Similar to SBT4.14: Subtilisin-like protease SBT4.14 (Arabidopsis thaliana OX%3D3702)
SMEL3Ch01	17923978	17926407	ID=SMEL_001g130640.1	Note=Similar to SBTI1.1: Subtilisin-like protease SBT1.1 (Arabidopsis thaliana OX%3D3702)
SMEL3Ch01	17929270	17953880	ID=SMEL_001g130650.1	Note=Similar to PLDBETA1: Phospholipase D beta 1 (Arabidopsis thaliana OX%3D3702)
SMEL3Ch01	17948813	17949286	ID=SMEL_001g130660.1	Note=Protein of unknown function
SMEL3Ch01	17949732	17950119	ID=SMEL_001g130670.1	Note=Protein of unknown function
SMEL3Ch01	17955111	17955527	ID=SMEL_001g130680.1	Note=Similar to TCP9: Transcription factor TCP9 (Arabidopsis thaliana OX%3D3702)
SMEL3Ch01	17956534	17959093	ID=SMEL_001g130690.1	Note=Similar to PEX16: Peroxisome biogenesis protein 16 (Arabidopsis thaliana OX%3D3702)
SMEL3Ch01	18159121	18160748	ID=SMEL_001g130700.1	Note=Protein of unknown function
SMEL3Ch01	18161807	18169471	ID=SMEL_001g130710.1	Note=Similar to CPFTSY: Cell division protein FtsY homolog%2C chloroplastic (Arabidopsis thaliana OX%3D3702)
SMEL3Ch01	18174469	18175050	ID=SMEL_001g130720.1	Note=Similar to BAP2: BON1-associated protein 2 (Arabidopsis thaliana OX%3D3702)
SMEL3Ch01	18176598	18183716	ID=SMEL_001g130730.1	Note=Similar to At4g11680: E3 ubiquitin-protein ligase At4g11680 (Arabidopsis thaliana OX%3D3702)
SMEL3Ch01	18187273	18190079	ID=SMEL_001g130740.1	Note=Similar to PCMP-H60: Pentatricopeptide repeat-containing protein At2g27610 (Arabidopsis thaliana OX%3D3702)
SMEL3Ch01	18192350	18197961	ID=SMEL_001g130750.1	Note=Similar to ASK8: Shaggy-related protein kinase theta (Arabidopsis thaliana OX%3D3702)
SMEL3Ch01	18234790	18242290	ID=SMEL_001g130760.1	Note=Similar to ANL2: Homeobox-leucine zipper protein ANTHOCYANINLESS 2 (Arabidopsis thaliana OX%3D3702)
SMEL3Ch01	18252058	18259245	ID=SMEL_001g130770.1	Note=Similar to At4g00740: Probable methyltransferase PMT13 (Arabidopsis thaliana OX%3D3702)
SMEL3Ch01	18261313	18273884	ID=SMEL_001g130780.1	Note=Similar to CSN1: COP9 signalosome complex subunit 1 (Arabidopsis thaliana OX%3D3702)
SMEL3Ch01	18305020	18306246	ID=SMEL_001g130790.1	Note=Similar to SDR3b: Short-chain dehydrogenase reductase 3b (Arabidopsis thaliana OX%3D3702)
SMEL3Ch01	18340911	18342212	ID=SMEL_001g130800.1	Note=Similar to ASAT3: Acylsugar acyltransferase 3 (Solanum lycopersicum OX%3D4081)
SMEL3Ch01	18354276	18355282	ID=SMEL_001g130810.1	Note=Similar to SDR3b: Short-chain dehydrogenase reductase 3b (Arabidopsis thaliana OX%3D3702)
SMEL3Ch01	18363028	18364433	ID=SMEL_001g130820.1	Note=Similar to CYC2: Iridoid synthase CYC2 (Camptotheca acuminata OX%3D16922)
SMEL3Ch01	18368206	18372865	ID=SMEL_001g130830.1	Note=Similar to At4g00750: Probable methyltransferase PMT15 (Arabidopsis thaliana OX%3D3702)
SMEL3Ch01	18401723	18403748	ID=SMEL_001g130840.1	Note=Similar to PP2A13: F-box protein PP2-A13 (Arabidopsis thaliana OX%3D3702)
SMEL3Ch01	18408795	18413728	ID=SMEL_001g130850.1	Note=Similar to At4g00755: F-box protein At4g00755 (Arabidopsis thaliana OX%3D3702)
SMEL3Ch01	18415682	18420386	ID=SMEL_001g130860.1	Note=Similar to At4g00755: F-box protein At4g00755 (Arabidopsis thaliana OX%3D3702)
SMEL3Ch01	18422134	18426247	ID=SMEL_001g130870.1	Note=Similar to At4g00755: F-box protein At4g00755 (Arabidopsis thaliana OX%3D3702)
SMEL3Ch01	18427185	18430807	ID=SMEL_001g130880.1	Note=Similar to PEX11D: Peroxisomal membrane protein 11D (Arabidopsis thaliana OX%3D3702)
SMEL3Ch01	18435196	18438852	ID=SMEL_001g130890.1	Note=Similar to PUB3: U-box domain-containing protein 3 (Arabidopsis thaliana OX%3D3702)
SMEL3Ch01	18446026	18450134	ID=SMEL_001g130900.1	Note=Similar to RS40: Serine/arginine-rich splicing factor RS40 (Arabidopsis thaliana OX%3D3702)
SMEL3Ch01	18452155	18453030	ID=SMEL_001g130910.1	Note=Similar to RAP2-11: Ethylene-responsive transcription factor RAP2-11 (Arabidopsis thaliana OX%3D3702)
SMEL3Ch01	18462005	18464756	ID=SMEL_001g130920.1	Note=Similar to ATL1: RING-H2 finger protein ATL1 (Arabidopsis thaliana OX%3D3702)
SMEL3Ch01	18465788	18472498	ID=SMEL_001g130930.1	Note=Similar to At3g61080: Protein-ribulosamine 3-kinase%2C chloroplastic (Arabidopsis thaliana OX%3D3702)
SMEL3Ch01	18473661	18474143	ID=SMEL_001g130940.1	Note=Protein of unknown function
SMEL3Ch01	18474384	18480467	ID=SMEL_001g130950.1	Note=Similar to PFC1: Ribosomal RNA small subunit methyltransferase%2C chloroplastic (Arabidopsis thaliana OX%3D3702)
SMEL3Ch01	18481419	18485058	ID=SMEL_001g130960.1	Note=Similar to ARR2: Two-component response regulator ARR2 (Arabidopsis thaliana OX%3D3702)
SMEL3Ch01	18487873	18492865	ID=SMEL_001g130970.1	Note=Similar to GEN1: Flap endonuclease GEN-like 1 (Arabidopsis thaliana OX%3D3702)
SMEL3Ch01	18499270	18501791	ID=SMEL_001g130980.1	Note=Protein of unknown function
SMEL3Ch01	18513510	18516568	ID=SMEL_001g130990.1	Note=Similar to UTR4: UDP-galactose/UDP-glucose transporter 4 (Arabidopsis thaliana OX%3D3702)
SMEL3Ch01	18530430	18533765	ID=SMEL_001g131000.1	Note=Protein of unknown function
SMEL3Ch01	18538299	18542145	ID=SMEL_001g131010.1	Note=Similar to GRF12: Growth-regulating factor 12 (Oryza sativa subsp. japonica OX%3D39947)
SMEL3Ch01	18551991	18553253	ID=SMEL_001g131020.1	Note=Similar to FLA10: Fasciclin-like arabinogalactan protein 10 (Arabidopsis thaliana OX%3D3702)
SMEL3Ch01	18560684	18561436	ID=SMEL_001g131030.1	Note=Similar to ECI1: Enoyl-CoA delta isomerase 1%2C peroxisomal (Arabidopsis thaliana OX%3D3702)
SMEL3Ch01	18562029	18571608	ID=SMEL_001g131040.1	Note=Protein of unknown function
SMEL3Ch01	18576585	18587765	ID=SMEL_001g131050.1	Note=Protein of unknown function
SMEL3Ch01	18591998	18592994	ID=SMEL_001g131060.1	Note=Similar to ZPR2: Protein LITTLE ZIPPER 2 (Arabidopsis thaliana OX%3D3702)
SMEL3Ch01	18596280	18597915	ID=SMEL_001g131070.1	Note=Protein of unknown function
SMEL3Ch01	18600627	18610446	ID=SMEL_001g131080.1	Note=Similar to KINUB: Kinesin-like protein KIN-UB (Arabidopsis thaliana OX%3D3702)
SMEL3Ch01	18618200	18619674	ID=SMEL_001g131090.1	Note=Similar to AHL22: AT-hook motif nuclear-localized protein 22 (Arabidopsis thaliana OX%3D3702)
SMEL3Ch01	18638661	18639242	ID=SMEL_001g131100.1	Note=Similar to CML10: Probable calcium-binding protein CML10 (Oryza sativa subsp. japonica OX%3D39947)
SMEL3Ch01	18642002	18660364	ID=SMEL_001g131110.1	Note=Similar to BIG2: Brefeldin A-inhibited guanine nucleotide-exchange protein 2 (Arabidopsis thaliana OX%3D3702)
SMEL3Ch01	18668231	18673966	ID=SMEL_001g131120.1	Note=Similar to At1g01970: Pentatricopeptide repeat-containing protein At1g01970 (Arabidopsis thaliana OX%3D3702)
SMEL3Ch01	18676616	18681289	ID=SMEL_001g131130.1	Note=Similar to LBD18: LOB domain-containing protein 18 (Arabidopsis thaliana OX%3D3702)
SMEL3Ch01	18698277	18700427	ID=SMEL_001g131140.1	Note=Similar to CXE9: Probable carboxylesterase 9 (Arabidopsis thaliana OX%3D3702)
SMEL3Ch01	18704635	18707416	ID=SMEL_001g131150.1	Note=Similar to LBD31: LOB domain-containing protein 31 (Arabidopsis thaliana OX%3D3702)
SMEL3Ch01	18716237	18718222	ID=SMEL_001g131160.1	Note=Protein of unknown function
SMEL3Ch01	18725174	18730680	ID=SMEL_001g131170.1	Note=Similar to MAP65-3: 65-kDa microtubule-associated protein 3 (Arabidopsis thaliana OX%3D3702)
SMEL3Ch01	18740012	18744914	ID=SMEL_001g131180.1	Note=Similar to AHL1: AT-hook motif nuclear-localized protein 1 (Arabidopsis thaliana OX%3D3702)
SMEL3Ch01	18745213	18750480	ID=SMEL_001g131190.1	Note=Similar to At1g12390: Protein cornichon homolog 4 (Arabidopsis thaliana OX%3D3702)
SMEL3Ch01	18774320	18777173	ID=SMEL_001g131200.1	Note=Protein of unknown function
SMEL3Ch01	18778755	18784945	ID=SMEL_001g131210.1	Note=Similar to KU80: ATP-dependent DNA helicase 2 subunit KU80 (Arabidopsis thaliana OX%3D3702)
SMEL3Ch01	18785767	18798393	ID=SMEL_001g131220.1	Note=Similar to FKBP43: Peptidyl-prolyl cis-trans isomerase FKBP43 (Arabidopsis thaliana OX%3D3702)
SMEL3Ch01	18800278	18806778	ID=SMEL_001g131230.1	Note=Similar to GST1: Glutathione S-transferase 1 (Dianthus caryophyllus OX%3D3570)
SMEL3Ch01	18823210	18826417	ID=SMEL_001g131240.1	Note=Similar to SMO1-1: Methylsterol monooxygenase 1-1 (Arabidopsis thaliana OX%3D3702)
SMEL3Ch01	18828372	18837879	ID=SMEL_001g131250.1	Note=Similar to CHLREDRAFT_130093: Probable cytosolic iron-sulfur protein assembly protein CIAO1 homolog (Chlamydomonas reinhardtii OX%3D3055)
SMEL3Ch01	18845814	18859337	ID=SMEL_001g131260.1	Note=Similar to SEC1A: Protein transport Sec1a (Arabidopsis thaliana OX%3D3702)
SMEL3Ch01	19050007	19054276	ID=SMEL_001g131270.1	Note=Similar to PAT14: Probable protein S-acyltransferase 14 (Arabidopsis thaliana OX%3D3702)
SMEL3Ch01	19061817	19062575	ID=SMEL_001g131280.1	Note=Similar to PAT14: Probable protein S-acyltransferase 14 (Arabidopsis thaliana OX%3D3702)
SMEL3Ch01	19063508	19066767	ID=SMEL_001g131290.1	Note=Protein of unknown function
SMEL3Ch01	19068541	19072498	ID=SMEL_001g131300.1	Note=Protein of unknown function
SMEL3Ch01	19080428	19081655	ID=SMEL_001g131310.1	Note=Protein of unknown function
SMEL3Ch01	19085383	19086123	ID=SMEL_001g131320.1	Note=Protein of unknown function
SMEL3Ch01	19090466	19093455	ID=SMEL_001g131330.1	Note=Similar to CRR4: Pentatricopeptide repeat-containing protein At2g45350%2C chloroplastic (Arabidopsis thaliana OX%3D3702)
SMEL3Ch01	19096789	19101678	ID=SMEL_001g131340.1	Note=Similar to IMK2: Probably inactive leucine-rich repeat receptor-like protein kinase IMK2 (Arabidopsis thaliana OX%3D3702)
SMEL3Ch01	19114452	19116396	ID=SMEL_001g131350.1	Note=Similar to RPS13: 40S ribosomal protein S13 (Glycine max OX%3D3847)
SMEL3Ch01	19118172	19123966	ID=SMEL_001g131360.1	Note=Protein of unknown function
SMEL3Ch01	19126471	19127778	ID=SMEL_001g131370.1	Note=Similar to GAE3: UDP-glucuronate 4-epimerase 3 (Arabidopsis thaliana OX%3D3702)
SMEL3Ch01	19137403	19143675	ID=SMEL_001g131380.1	Note=Similar to 3-phosphoshikimate 1-carboxyvinyltransferase%2C chloroplastic (Solanum lycopersicum OX%3D4081)
SMEL3Ch01	19153112	19156426	ID=SMEL_001g131390.1	Note=Similar to NPF7.3: Protein NRT1/ PTR FAMILY 7.3 (Arabidopsis thaliana OX%3D3702)
SMEL3Ch01	19157037	19161816	ID=SMEL_001g131400.1	Note=Similar to ARGAH1: Arginase 1%2C mitochondrial (Arabidopsis thaliana OX%3D3702)
SMEL3Ch01	19167054	19171503	ID=SMEL_001g131410.1	Note=Protein of unknown function
SMEL3Ch01	19172841	19175815	ID=SMEL_001g131420.1	Note=Protein of unknown function
SMEL3Ch01	19192207	19193472	ID=SMEL_001g131430.1	Note=Similar to GIL1: Protein GRAVITROPIC IN THE LIGHT 1 (Arabidopsis thaliana OX%3D3702)
SMEL3Ch01	19196024	19196677	ID=SMEL_001g131440.1	Note=Similar to 21 kDa protein (Daucus carota OX%3D4039)
SMEL3Ch01	19202528	19203151	ID=SMEL_001g131450.1	Note=Similar to PMEI9: Pectinesterase inhibitor 9 (Arabidopsis thaliana OX%3D3702)
SMEL3Ch01	19204919	19220891	ID=SMEL_001g131460.1	Note=Similar to TFCD: Tubulin-folding cofactor D (Arabidopsis thaliana OX%3D3702)
SMEL3Ch01	19221888	19234653	ID=SMEL_001g131470.1	Note=Similar to MAP1A: Methionine aminopeptidase 1A (Arabidopsis thaliana OX%3D3702)
SMEL3Ch01	19241154	19243682	ID=SMEL_001g131480.1	Note=Similar to PME36: Probable pectinesterase/pectinesterase inhibitor 36 (Arabidopsis thaliana OX%3D3702)
SMEL3Ch01	19260320	19263008	ID=SMEL_001g131490.1	Note=Similar to PECS-2.1: Pectinesterase 2 (Citrus sinensis OX%3D2711)
SMEL3Ch01	19269097	19273304	ID=SMEL_001g131500.1	Note=Similar to PDLP8: Plasmodesmata-located protein 8 (Arabidopsis thaliana OX%3D3702)
SMEL3Ch01	19284316	19284792	ID=SMEL_001g131510.1	Note=Similar to SAUR36: Auxin-responsive protein SAUR36 (Arabidopsis thaliana OX%3D3702)
SMEL3Ch01	19312199	19316546	ID=SMEL_001g131520.1	Note=Similar to YAB1: Axial regulator YABBY 1 (Arabidopsis thaliana OX%3D3702)
SMEL3Ch01	19327950	19336292	ID=SMEL_001g131530.1	Note=Similar to GOS12: Golgi SNAP receptor complex member 1-2 (Arabidopsis thaliana OX%3D3702)
SMEL3Ch01	19344861	19347034	ID=SMEL_001g131540.1	Note=Protein of unknown function
SMEL3Ch01	19347168	19348307	ID=SMEL_001g131550.1	Note=Protein of unknown function
SMEL3Ch01	19367076	19375017	ID=SMEL_001g131560.1	Note=Similar to PVA13: Vesicle-associated protein 1-3 (Arabidopsis thaliana OX%3D3702)
SMEL3Ch01	19378305	19378750	ID=SMEL_001g131570.1	Note=Protein of unknown function
SMEL3Ch01	19380491	19380859	ID=SMEL_001g131580.1	Note=Similar to At4g00165: Putative lipid-binding protein At4g00165 (Arabidopsis thaliana OX%3D3702)
SMEL3Ch01	19380658	19380801	ID=SMEL_001g131590.1	Note=Protein of unknown function
SMEL3Ch01	19382796	19383606	ID=SMEL_001g131600.1	Note=Protein of unknown function
SMEL3Ch01	19405732	19408014	ID=SMEL_001g131610.1	Note=Protein of unknown function
SMEL3Ch01	19439180	19439281	ID=SMEL_001g131620.1	Note=Protein of unknown function
SMEL3Ch01	19439497	19441794	ID=SMEL_001g131630.1	Note=Similar to SCL6: Scarecrow-like protein 6 (Arabidopsis thaliana OX%3D3702)
SMEL3Ch01	19475599	19490231	ID=SMEL_001g131640.1	Note=Similar to CDS5: Phosphatidate cytidylyltransferase 5%2C chloroplastic (Arabidopsis thaliana OX%3D3702)
SMEL3Ch01	19506071	19512453	ID=SMEL_001g131650.1	Note=Protein of unknown function
SMEL3Ch01	19512496	19522631	ID=SMEL_001g131660.1	Note=Similar to PVA12: Vesicle-associated protein 1-2 (Arabidopsis thaliana OX%3D3702)
SMEL3Ch01	19526787	19530071	ID=SMEL_001g131670.1	Note=Protein of unknown function
SMEL3Ch01	19540491	19542196	ID=SMEL_001g131680.1	Note=Similar to SPX3: SPX domain-containing protein 3 (Arabidopsis thaliana OX%3D3702)
SMEL3Ch01	19544180	19547045	ID=SMEL_001g131690.1	Note=Protein of unknown function
SMEL3Ch01	19547596	19548054	ID=SMEL_001g131700.1	Note=Similar to OFP17: Transcription repressor OFP17 (Arabidopsis thaliana OX%3D3702)
SMEL3Ch01	19551303	19565571	ID=SMEL_001g131710.1	Note=Protein of unknown function
SMEL3Ch01	19566753	19577415	ID=SMEL_001g131720.1	Note=Protein of unknown function
SMEL3Ch01	19592291	19593280	ID=SMEL_001g131730.1	Note=Similar to ZAT9: Zinc finger protein ZAT9 (Arabidopsis thaliana OX%3D3702)
SMEL3Ch01	19612392	19613963	ID=SMEL_001g131740.1	Note=Similar to ZAT3: Zinc finger protein ZAT3 (Arabidopsis thaliana OX%3D3702)
SMEL3Ch01	19617200	19619181	ID=SMEL_001g131750.1	Note=Similar to EXPB2: Putative expansin-B2 (Arabidopsis thaliana OX%3D3702)
SMEL3Ch01	19639098	19640272	ID=SMEL_001g131760.1	Note=Similar to CYCU2-2: Cyclin-U2-2 (Arabidopsis thaliana OX%3D3702)
SMEL3Ch01	19651305	19653933	ID=SMEL_001g131770.1	Note=Similar to At5g07670: F-box protein At5g07670 (Arabidopsis thaliana OX%3D3702)
SMEL3Ch01	19661202	19666939	ID=SMEL_001g131780.1	Note=Similar to UNE10: Transcription factor UNE10 (Arabidopsis thaliana OX%3D3702)
SMEL3Ch01	19680924	19711026	ID=SMEL_001g131790.1	Note=Protein of unknown function
SMEL3Ch01	19722771	19728901	ID=SMEL_001g131800.1	Note=Similar to RHIP1: RGS1-HXK1-interacting protein 1 (Arabidopsis thaliana OX%3D3702)
SMEL3Ch01	19729683	19730809	ID=SMEL_001g131810.1	Note=Similar to GATA4: GATA transcription factor 4 (Arabidopsis thaliana OX%3D3702)
SMEL3Ch01	19737571	19747417	ID=SMEL_001g131820.1	Note=Similar to CCT1: T-complex protein 1 subunit alpha (Arabidopsis thaliana OX%3D3702)
SMEL3Ch01	19775197	19777023	ID=SMEL_001g131830.1	Note=Protein of unknown function
SMEL3Ch01	19791253	19794689	ID=SMEL_001g131840.1	Note=Similar to SPL8: Squamosa promoter-binding-like protein 8 (Arabidopsis thaliana OX%3D3702)
SMEL3Ch01	19804914	19811748	ID=SMEL_001g131850.1	Note=Protein of unknown function
SMEL3Ch01	19813037	19817365	ID=SMEL_001g131860.1	Note=Similar to Os10g0478200: Malate dehydrogenase%2C cytoplasmic (Oryza sativa subsp. japonica OX%3D39947)
SMEL3Ch01	19822156	19836728	ID=SMEL_001g131870.1	Note=Similar to At3g60510: 3-hydroxyisobutyryl-CoA hydrolase-like protein 1%2C mitochondrial (Arabidopsis thaliana OX%3D3702)
SMEL3Ch01	19836993	19855908	ID=SMEL_001g131880.1	Note=Similar to MEFG2: Elongation factor G-2%2C mitochondrial (Arabidopsis thaliana OX%3D3702)
SMEL3Ch01	19853674	19855893	ID=SMEL_001g131890.1	Note=Protein of unknown function
SMEL3Ch01	19856038	19864542	ID=SMEL_001g131900.1	Note=Similar to NUP62: Nuclear pore complex protein NUP62 (Arabidopsis thaliana OX%3D3702)
SMEL3Ch01	19865767	19869450	ID=SMEL_001g131910.1	Note=Protein of unknown function
SMEL3Ch01	19873334	19879544	ID=SMEL_001g131920.1	Note=Similar to CCD7: Carotenoid cleavage dioxygenase 7%2C chloroplastic (Arabidopsis thaliana OX%3D3702)
SMEL3Ch01	19896974	19918823	ID=SMEL_001g131930.1	Note=Similar to CHR10: Probable helicase CHR10 (Arabidopsis thaliana OX%3D3702)
SMEL3Ch01	19919315	19920834	ID=SMEL_001g131940.1	Note=Similar to AOP1: Probable 2-oxoglutarate-dependent dioxygenase AOP1 (Arabidopsis thaliana OX%3D3702)
SMEL3Ch01	19931155	19933408	ID=SMEL_001g131950.1	Note=Similar to AOP1.2: Probable 2-oxoglutarate-dependent dioxygenase AOP1.2 (Arabidopsis thaliana OX%3D3702)
SMEL3Ch01	19940448	19942099	ID=SMEL_001g131960.1	Note=Similar to PKSA: Type III polyketide synthase A (Arabidopsis thaliana OX%3D3702)
SMEL3Ch01	19943686	19954663	ID=SMEL_001g131970.1	Note=Protein of unknown function
SMEL3Ch01	19964473	19965279	ID=SMEL_001g131980.1	Note=Similar to ERF034: Ethylene-responsive transcription factor ERF034 (Arabidopsis thaliana OX%3D3702)
SMEL3Ch01	19984153	19992958	ID=SMEL_001g131990.1	Note=Similar to DJA6: Chaperone protein dnaJ A6 (Oryza sativa subsp. japonica OX%3D39947)
SMEL3Ch01	19995213	19997600	ID=SMEL_001g132000.1	Note=Similar to DUO1: Transcription factor DUO1 (Arabidopsis thaliana OX%3D3702)
SMEL3Ch01	20008420	20010513	ID=SMEL_001g132010.1	Note=Similar to PCMP-E46: Putative pentatricopeptide repeat-containing protein At3g25970 (Arabidopsis thaliana OX%3D3702)
SMEL3Ch01	20011295	20015041	ID=SMEL_001g132020.1	Note=Protein of unknown function
SMEL3Ch01	20032335	20035649	ID=SMEL_001g132030.1	Note=Similar to MTERF18: Transcription termination factor MTEF18%2C mitochondrial (Arabidopsis thaliana OX%3D3702)
SMEL3Ch01	20036566	20041440	ID=SMEL_001g132040.1	Note=Similar to PEP: RNA-binding KH domain-containing protein PEPPER (Arabidopsis thaliana OX%3D3702)
SMEL3Ch01	20043710	20050529	ID=SMEL_001g132050.1	Note=Protein of unknown function
SMEL3Ch01	20059232	20062284	ID=SMEL_001g132060.1	Note=Similar to ATHB-4: Homeobox-leucine zipper protein ATHB-4 (Arabidopsis thaliana OX%3D3702)
SMEL3Ch01	20064140	20070315	ID=SMEL_001g132070.1	Note=Similar to ARPC5A: Actin-related protein 2/3 complex subunit 5A (Arabidopsis thaliana OX%3D3702)
SMEL3Ch01	20076462	20078930	ID=SMEL_001g132080.1	Note=Protein of unknown function
SMEL3Ch01	20081179	20084900	ID=SMEL_001g132090.1	Note=Similar to R1B-14: Putative late blight resistance protein homolog R1B-14 (Solanum demissum OX%3D50514)
SMEL3Ch01	20093735	20128570	ID=SMEL_001g132100.1	Note=Similar to FBX5: Protein ARABIDILLO 1 (Arabidopsis thaliana OX%3D3702)
SMEL3Ch01	20131622	20135178	ID=SMEL_001g132110.1	Note=Protein of unknown function
SMEL3Ch01	20136215	20140535	ID=SMEL_001g132120.1	Note=Similar to PCMP-E9: Pentatricopeptide repeat-containing protein At2g44880 (Arabidopsis thaliana OX%3D3702)
SMEL3Ch01	20140636	20142961	ID=SMEL_001g132130.1	Note=Protein of unknown function
SMEL3Ch01	20192516	20192857	ID=SMEL_001g132140.1	Note=Similar to Non-specific lipid-transfer protein A (Ricinus communis OX%3D3988)
SMEL3Ch01	20200898	20201584	ID=SMEL_001g132150.1	Note=Similar to Non-specific lipid-transfer protein A (Ricinus communis OX%3D3988)
SMEL3Ch01	20206618	20208334	ID=SMEL_001g132160.1	Note=Similar to ERF13: Ethylene-responsive transcription factor 13 (Arabidopsis thaliana OX%3D3702)
SMEL3Ch01	20253216	20253866	ID=SMEL_001g132170.1	Note=Similar to ERF13: Ethylene-responsive transcription factor 13 (Arabidopsis thaliana OX%3D3702)
SMEL3Ch01	20389814	20407261	ID=SMEL_001g132180.1	Note=Similar to LCMT1: Leucine carboxyl methyltransferase 1 homolog (Arabidopsis thaliana OX%3D3702)
SMEL3Ch01	20414746	20419962	ID=SMEL_001g132190.1	Note=Similar to NRG2: Nitrate regulatory gene2 protein (Arabidopsis thaliana OX%3D3702)
SMEL3Ch01	20424821	20427125	ID=SMEL_001g132200.1	Note=Similar to SIEL: Protein SIEL (Arabidopsis thaliana OX%3D3702)
SMEL3Ch01	20447837	20451196	ID=SMEL_001g132210.1	Note=Similar to SIEL: Protein SIEL (Arabidopsis thaliana OX%3D3702)
SMEL3Ch01	20453855	20454370	ID=SMEL_001g132220.1	Note=Similar to PMEI: Pectinesterase inhibitor (Actinidia deliciosa OX%3D3627)
SMEL3Ch01	20459759	20463905	ID=SMEL_001g132230.1	Note=Similar to D6PKL2: Serine/threonine-protein kinase D6PKL2 (Arabidopsis thaliana OX%3D3702)
SMEL3Ch01	20477748	20511148	ID=SMEL_001g132240.1	Note=Similar to VAD1: Protein VASCULAR ASSOCIATED DEATH 1%2C chloroplastic (Arabidopsis thaliana OX%3D3702)
SMEL3Ch01	20485409	20485810	ID=SMEL_001g132250.1	Note=Protein of unknown function
SMEL3Ch01	20512574	20522624	ID=SMEL_001g132260.1	Note=Protein of unknown function
SMEL3Ch01	20524960	20525291	ID=SMEL_001g132270.1	Note=Similar to PLAT2: PLAT domain-containing protein 2 (Arabidopsis thaliana OX%3D3702)
SMEL3Ch01	20525455	20527556	ID=SMEL_001g132280.1	Note=Similar to RPS9C: 40S ribosomal protein S9-2 (Arabidopsis thaliana OX%3D3702)
SMEL3Ch01	20528451	20533787	ID=SMEL_001g132290.1	Note=Similar to Os09g0505700: Ribulose-phosphate 3-epimerase%2C cytoplasmic isoform (Oryza sativa subsp. japonica OX%3D39947)
SMEL3Ch01	20535304	20537770	ID=SMEL_001g132300.1	Note=Similar to PUB33: U-box domain-containing protein 33 (Arabidopsis thaliana OX%3D3702)
SMEL3Ch01	20544397	20558303	ID=SMEL_001g132310.1	Note=Similar to EDD1: Glycine--tRNA ligase%2C chloroplastic/mitochondrial 2 (Arabidopsis thaliana OX%3D3702)
SMEL3Ch01	20573697	20595024	ID=SMEL_001g132320.1	Note=Similar to EDD1: Glycine--tRNA ligase%2C chloroplastic/mitochondrial 2 (Arabidopsis thaliana OX%3D3702)
SMEL3Ch01	20598718	20599902	ID=SMEL_001g132330.1	Note=Protein of unknown function
SMEL3Ch01	20604524	20605078	ID=SMEL_001g132340.1	Note=Protein of unknown function
SMEL3Ch01	20606613	20613873	ID=SMEL_001g132350.1	Note=Similar to RGGB: RGG repeats nuclear RNA binding protein B (Arabidopsis thaliana OX%3D3702)
SMEL3Ch01	20615133	20615957	ID=SMEL_001g132360.1	Note=Similar to DODA: 4%2C5-DOPA dioxygenase extradiol (Beta vulgaris OX%3D161934)
SMEL3Ch01	20621388	20628029	ID=SMEL_001g132370.1	Note=Similar to RABD2A: Ras-related protein RABD2a (Arabidopsis thaliana OX%3D3702)
SMEL3Ch01	20644227	20645798	ID=SMEL_001g132380.1	Note=Similar to F3H-3: Flavanone 3-dioxygenase 3 (Oryza sativa subsp. japonica OX%3D39947)
SMEL3Ch01	20645383	20645960	ID=SMEL_001g132390.1	Note=Protein of unknown function
SMEL3Ch01	20680599	20683004	ID=SMEL_001g132400.1	Note=Similar to F3H-3: Flavanone 3-dioxygenase 3 (Oryza sativa subsp. japonica OX%3D39947)
SMEL3Ch01	20692588	20694308	ID=SMEL_001g132410.1	Note=Similar to UCC3: Uclacyanin-3 (Arabidopsis thaliana OX%3D3702)
SMEL3Ch01	20695901	20696630	ID=SMEL_001g132420.1	Note=Protein of unknown function
SMEL3Ch01	20699034	20701112	ID=SMEL_001g132430.1	Note=Protein of unknown function
SMEL3Ch01	20703240	20703401	ID=SMEL_001g132440.1	Note=Similar to rpoC2: DNA-directed RNA polymerase subunit beta'' (Atropa belladonna OX%3D33113)
SMEL3Ch01	20703440	20707520	ID=SMEL_001g132450.1	Note=Similar to rpoC2: DNA-directed RNA polymerase subunit beta'' (Solanum tuberosum OX%3D4113)
SMEL3Ch01	20708453	20711304	ID=SMEL_001g132460.1	Note=Similar to BI-1: Bax inhibitor 1 (Arabidopsis thaliana OX%3D3702)
SMEL3Ch01	20712531	20715095	ID=SMEL_001g132470.1	Note=Similar to BI-1: Bax inhibitor 1 (Arabidopsis thaliana OX%3D3702)
SMEL3Ch01	20719309	20720556	ID=SMEL_001g132480.1	Note=Similar to CPR1: F-box protein CPR1 (Arabidopsis thaliana OX%3D3702)
SMEL3Ch01	20723339	20725488	ID=SMEL_001g132490.1	Note=Similar to BI-1: Bax inhibitor 1 (Arabidopsis thaliana OX%3D3702)
SMEL3Ch01	20739646	20740959	ID=SMEL_001g132500.1	Note=Protein of unknown function
SMEL3Ch01	20748251	20752110	ID=SMEL_001g132510.1	Note=Similar to YSL7: Probable metal-nicotianamine transporter YSL7 (Arabidopsis thaliana OX%3D3702)
SMEL3Ch01	20752671	20753596	ID=SMEL_001g132520.1	Note=Similar to BI-1: Bax inhibitor 1 (Arabidopsis thaliana OX%3D3702)
SMEL3Ch01	20760358	20766661	ID=SMEL_001g132530.1	Note=Similar to R1A: Late blight resistance protein R1-A (Solanum demissum OX%3D50514)
SMEL3Ch01	20775431	20782744	ID=SMEL_001g132540.1	Note=Similar to BI-1: Bax inhibitor 1 (Arabidopsis thaliana OX%3D3702)
SMEL3Ch01	20783305	20785278	ID=SMEL_001g132550.1	Note=Similar to YSL7: Probable metal-nicotianamine transporter YSL7 (Arabidopsis thaliana OX%3D3702)
SMEL3Ch01	20804729	20810847	ID=SMEL_001g132560.1	Note=Protein of unknown function
SMEL3Ch01	20811625	20813662	ID=SMEL_001g132570.1	Note=Similar to Nucleoside diphosphate kinase 1 (Nicotiana tabacum OX%3D4097)
SMEL3Ch01	20839817	20840029	ID=SMEL_001g132580.1	Note=Protein of unknown function
SMEL3Ch01	20849198	20854377	ID=SMEL_001g132590.1	Note=Similar to WRKY12: Probable WRKY transcription factor 12 (Arabidopsis thaliana OX%3D3702)
SMEL3Ch01	20859003	20860919	ID=SMEL_001g132600.1	Note=Protein of unknown function
SMEL3Ch01	20861228	20869482	ID=SMEL_001g132610.1	Note=Similar to At3g26920: F-box/FBD/LRR-repeat protein At3g26920 (Arabidopsis thaliana OX%3D3702)
SMEL3Ch01	20876357	20880170	ID=SMEL_001g132620.1	Note=Similar to FLOT1: Flotillin-like protein 1 (Medicago truncatula OX%3D3880)
SMEL3Ch01	20881369	20883551	ID=SMEL_001g132630.1	Note=Similar to ALG12: Dol-P-Man:Man(7)GlcNAc(2)-PP-Dol alpha-1%2C6-mannosyltransferase (Arabidopsis thaliana OX%3D3702)
SMEL3Ch01	20883877	20901647	ID=SMEL_001g132640.1	Note=Similar to ALG12: Dol-P-Man:Man(7)GlcNAc(2)-PP-Dol alpha-1%2C6-mannosyltransferase (Arabidopsis thaliana OX%3D3702)
SMEL3Ch01	20902297	20902869	ID=SMEL_001g132650.1	Note=Protein of unknown function
SMEL3Ch01	20904082	20908528	ID=SMEL_001g132660.1	Note=Similar to At1g02150: Pentatricopeptide repeat-containing protein At1g02150 (Arabidopsis thaliana OX%3D3702)
SMEL3Ch01	20911023	20914502	ID=SMEL_001g132670.1	Note=Similar to At1g02150: Pentatricopeptide repeat-containing protein At1g02150 (Arabidopsis thaliana OX%3D3702)
SMEL3Ch01	20926608	20928572	ID=SMEL_001g132680.1	Note=Similar to CYCU4-1: Cyclin-U4-1 (Arabidopsis thaliana OX%3D3702)
SMEL3Ch01	20933501	20934463	ID=SMEL_001g132690.1	Note=Similar to BAD1: Ankyrin repeat-containing protein BDA1 (Arabidopsis thaliana OX%3D3702)
SMEL3Ch01	20936682	20937395	ID=SMEL_001g132700.1	Note=Protein of unknown function
SMEL3Ch01	20937479	20937715	ID=SMEL_001g132710.1	Note=Protein of unknown function
SMEL3Ch01	20943043	20945034	ID=SMEL_001g132720.1	Note=Similar to BAD1: Ankyrin repeat-containing protein BDA1 (Arabidopsis thaliana OX%3D3702)
SMEL3Ch01	20945663	20946133	ID=SMEL_001g132730.1	Note=Protein of unknown function
SMEL3Ch01	20946971	20947096	ID=SMEL_001g132740.1	Note=Protein of unknown function
SMEL3Ch01	20947407	20948399	ID=SMEL_001g132750.1	Note=Similar to FIP2: Protein FIP2 (Arabidopsis thaliana OX%3D3702)
SMEL3Ch01	20958029	20963541	ID=SMEL_001g132760.1	Note=Similar to LIF2: Heterogeneous nuclear ribonucleoprotein Q (Arabidopsis thaliana OX%3D3702)
SMEL3Ch01	20965018	20968552	ID=SMEL_001g132770.1	Note=Similar to At1g28695: Uncharacterized protein At1g28695 (Arabidopsis thaliana OX%3D3702)
SMEL3Ch01	20971914	20975699	ID=SMEL_001g132780.1	Note=Similar to RAC7: Rac-like GTP-binding protein 7 (Oryza sativa subsp. japonica OX%3D39947)
SMEL3Ch01	20976809	20978726	ID=SMEL_001g132790.1	Note=Protein of unknown function
SMEL3Ch01	20979102	20981435	ID=SMEL_001g132800.1	Note=Similar to CYP714C2: Cytochrome P450 714C2 (Oryza sativa subsp. japonica OX%3D39947)
SMEL3Ch01	20982505	20984469	ID=SMEL_001g132810.1	Note=Similar to At1g69290: Pentatricopeptide repeat-containing protein At1g69290 (Arabidopsis thaliana OX%3D3702)
SMEL3Ch01	20984652	20988150	ID=SMEL_001g132820.1	Note=Protein of unknown function
SMEL3Ch01	20993917	20998579	ID=SMEL_001g132830.1	Note=Similar to CKB1: Casein kinase II subunit beta-1 (Arabidopsis thaliana OX%3D3702)
SMEL3Ch01	21003860	21006483	ID=SMEL_001g132840.1	Note=Similar to ATJ39: Chaperone protein dnaJ 39 (Arabidopsis thaliana OX%3D3702)
SMEL3Ch01	21006993	21033049	ID=SMEL_001g132850.1	Note=Protein of unknown function
SMEL3Ch01	21035943	21037730	ID=SMEL_001g132860.1	Note=Similar to RPL37A: 60S ribosomal protein L37a (Gossypium hirsutum OX%3D3635)
SMEL3Ch01	21040925	21044644	ID=SMEL_001g132870.1	Note=Similar to AMC1: Metacaspase-1 (Arabidopsis thaliana OX%3D3702)
SMEL3Ch01	21055698	21060850	ID=SMEL_001g132880.1	Note=Similar to Os07g0555200: Eukaryotic translation initiation factor 4G (Oryza sativa subsp. japonica OX%3D39947)
SMEL3Ch01	21071119	21075866	ID=SMEL_001g132890.1	Note=Similar to Os07g0555200: Eukaryotic translation initiation factor 4G (Oryza sativa subsp. japonica OX%3D39947)
SMEL3Ch01	21093567	21099771	ID=SMEL_001g132900.1	Note=Similar to Os07g0555200: Eukaryotic translation initiation factor 4G (Oryza sativa subsp. japonica OX%3D39947)
SMEL3Ch01	21111474	21115574	ID=SMEL_001g132910.1	Note=Similar to PBL19: Probable serine/threonine-protein kinase PBL19 (Arabidopsis thaliana OX%3D3702)
SMEL3Ch01	21125996	21126133	ID=SMEL_001g132920.1	Note=Protein of unknown function
SMEL3Ch01	21129568	21130694	ID=SMEL_001g132930.1	Note=Similar to PBL19: Probable serine/threonine-protein kinase PBL19 (Arabidopsis thaliana OX%3D3702)
SMEL3Ch01	21130893	21136741	ID=SMEL_001g132940.1	Note=Similar to At5g01110: Pentatricopeptide repeat-containing protein At5g01110 (Arabidopsis thaliana OX%3D3702)
SMEL3Ch01	21140924	21141963	ID=SMEL_001g132950.1	Note=Similar to FLZ3: FCS-Like Zinc finger 3 (Arabidopsis thaliana OX%3D3702)
SMEL3Ch01	21167938	21169576	ID=SMEL_001g132960.1	Note=Protein of unknown function
SMEL3Ch01	21181112	21182563	ID=SMEL_001g132970.1	Note=Protein of unknown function
SMEL3Ch01	21186225	21190722	ID=SMEL_001g132980.1	Note=Similar to At2g44660: Probable dolichyl pyrophosphate Glc1Man9GlcNAc2 alpha-1%2C3-glucosyltransferase (Arabidopsis thaliana OX%3D3702)
SMEL3Ch01	21205822	21214674	ID=SMEL_001g132990.1	Note=Similar to RMR4: Receptor homology region%2C transmembrane domain- and RING domain-containing protein 4 (Arabidopsis thaliana OX%3D3702)
SMEL3Ch01	21226467	21226868	ID=SMEL_001g133000.1	Note=Similar to rpl2-A: 50S ribosomal protein L2%2C chloroplastic (Solanum lycopersicum OX%3D4081)
SMEL3Ch01	21239134	21240240	ID=SMEL_001g133010.1	Note=Similar to ATL4: E3 ubiquitin-protein ligase ATL4 (Arabidopsis thaliana OX%3D3702)
SMEL3Ch01	21246960	21250437	ID=SMEL_001g133020.1	Note=Protein of unknown function
SMEL3Ch01	21252218	21255743	ID=SMEL_001g133030.1	Note=Similar to CPN10-1: 10 kDa chaperonin 1%2C chloroplastic (Arabidopsis thaliana OX%3D3702)
SMEL3Ch01	21256825	21265369	ID=SMEL_001g133040.1	Note=Similar to TGD4: Protein TRIGALACTOSYLDIACYLGLYCEROL 4%2C chloroplastic (Arabidopsis thaliana OX%3D3702)
SMEL3Ch01	21266089	21266364	ID=SMEL_001g133050.1	Note=Similar to TGD4: Protein TRIGALACTOSYLDIACYLGLYCEROL 4%2C chloroplastic (Arabidopsis thaliana OX%3D3702)
SMEL3Ch01	21273445	21274011	ID=SMEL_001g133060.1	Note=Similar to Putative invertase inhibitor (Platanus acerifolia OX%3D140101)
SMEL3Ch01	21285757	21286320	ID=SMEL_001g133070.1	Note=Similar to Putative invertase inhibitor (Platanus acerifolia OX%3D140101)
SMEL3Ch01	21289874	21294331	ID=SMEL_001g133080.1	Note=Similar to MTACP1: Acyl carrier protein 1%2C mitochondrial (Arabidopsis thaliana OX%3D3702)
SMEL3Ch01	21295783	21303332	ID=SMEL_001g133090.1	Note=Similar to RABH1B: Ras-related protein RABH1b (Arabidopsis thaliana OX%3D3702)
SMEL3Ch01	21306035	21309376	ID=SMEL_001g133100.1	Note=Similar to PUP11: Probable purine permease 11 (Arabidopsis thaliana OX%3D3702)
SMEL3Ch01	21328811	21329749	ID=SMEL_001g133110.1	Note=Protein of unknown function
SMEL3Ch01	21349397	21358370	ID=SMEL_001g133120.1	Note=Similar to DRP1E: Dynamin-related protein 1E (Arabidopsis thaliana OX%3D3702)
SMEL3Ch01	21360919	21363559	ID=SMEL_001g133130.1	Note=Protein of unknown function
SMEL3Ch01	21799102	21804366	ID=SMEL_001g133140.1	Note=Similar to rpoC1: DNA-directed RNA polymerase subunit beta' (Nicotiana sylvestris OX%3D4096)
SMEL3Ch01	21811935	21813470	ID=SMEL_001g133150.1	Note=Similar to CSN7: COP9 signalosome complex subunit 7 (Arabidopsis thaliana OX%3D3702)
SMEL3Ch01	21828753	21834145	ID=SMEL_001g133160.1	Note=Similar to CSN7: COP9 signalosome complex subunit 7 (Arabidopsis thaliana OX%3D3702)
SMEL3Ch01	21838164	21838775	ID=SMEL_001g133170.1	Note=Similar to ERF13: Ethylene-responsive transcription factor 13 (Arabidopsis thaliana OX%3D3702)
SMEL3Ch01	21844042	21844611	ID=SMEL_001g133180.1	Note=Similar to ERF13: Ethylene-responsive transcription factor 13 (Arabidopsis thaliana OX%3D3702)
SMEL3Ch01	21849068	21849736	ID=SMEL_001g133190.1	Note=Similar to ERF2: Ethylene-responsive transcription factor 2 (Nicotiana tabacum OX%3D4097)
SMEL3Ch01	21908539	21920072	ID=SMEL_001g133200.1	Note=Similar to JHS1: DNA replication ATP-dependent helicase/nuclease JHS1 (Arabidopsis thaliana OX%3D3702)
SMEL3Ch01	21921050	21922879	ID=SMEL_001g133210.1	Note=Protein of unknown function
SMEL3Ch01	21944063	21948641	ID=SMEL_001g133220.1	Note=Similar to GL1-5: Very-long-chain aldehyde decarbonylase GL1-5 (Oryza sativa subsp. indica OX%3D39946)
SMEL3Ch01	21952772	21954846	ID=SMEL_001g133230.1	Note=Similar to PUB33: U-box domain-containing protein 33 (Arabidopsis thaliana OX%3D3702)
SMEL3Ch01	21969352	21973282	ID=SMEL_001g133240.1	Note=Similar to GL1-5: Very-long-chain aldehyde decarbonylase GL1-5 (Oryza sativa subsp. indica OX%3D39946)
SMEL3Ch01	21977814	21981570	ID=SMEL_001g133250.1	Note=Similar to ATL27: NEP1-interacting protein-like 1 (Arabidopsis thaliana OX%3D3702)
SMEL3Ch01	22008039	22008434	ID=SMEL_001g133260.1	Note=Similar to ATL3: RING-H2 finger protein ATL3 (Arabidopsis thaliana OX%3D3702)
SMEL3Ch01	22027088	22030681	ID=SMEL_001g133270.1	Note=Protein of unknown function
SMEL3Ch01	22030825	22035830	ID=SMEL_001g133280.1	Note=Similar to UMK3: UMP-CMP kinase 3 (Arabidopsis thaliana OX%3D3702)
SMEL3Ch01	22040975	22044442	ID=SMEL_001g133290.1	Note=Similar to At1g61280: Phosphatidylinositol N-acetylglucosaminyltransferase subunit P (Arabidopsis thaliana OX%3D3702)
SMEL3Ch01	22045966	22046955	ID=SMEL_001g133300.1	Note=Similar to At1g06270: Pentatricopeptide repeat-containing protein At1g06270 (Arabidopsis thaliana OX%3D3702)
SMEL3Ch01	22053844	22054185	ID=SMEL_001g133310.1	Note=Protein of unknown function
SMEL3Ch01	22055077	22059814	ID=SMEL_001g133320.1	Note=Similar to NPF7.3: Protein NRT1/ PTR FAMILY 7.3 (Arabidopsis thaliana OX%3D3702)
SMEL3Ch01	22067756	22069240	ID=SMEL_001g133330.1	Note=Similar to BSK2: Serine/threonine-protein kinase BSK2 (Arabidopsis thaliana OX%3D3702)
SMEL3Ch01	22070358	22084403	ID=SMEL_001g133340.1	Note=Similar to BSK2: Serine/threonine-protein kinase BSK2 (Arabidopsis thaliana OX%3D3702)
SMEL3Ch01	22105249	22105488	ID=SMEL_001g133350.1	Note=Protein of unknown function
SMEL3Ch01	22143406	22148513	ID=SMEL_001g133360.1	Note=Similar to KAO1: Ent-kaurenoic acid oxidase 1 (Arabidopsis thaliana OX%3D3702)
SMEL3Ch01	22159380	22160384	ID=SMEL_001g133370.1	Note=Protein of unknown function
SMEL3Ch01	22170261	22171475	ID=SMEL_001g133380.1	Note=Similar to PUB23: E3 ubiquitin-protein ligase PUB23 (Arabidopsis thaliana OX%3D3702)
SMEL3Ch01	22179363	22192795	ID=SMEL_001g133390.1	Note=Similar to CHY1: 3-hydroxyisobutyryl-CoA hydrolase 1 (Arabidopsis thaliana OX%3D3702)
SMEL3Ch01	22195853	22200542	ID=SMEL_001g133400.1	Note=Similar to TTL: Uric acid degradation bifunctional protein TTL (Arabidopsis thaliana OX%3D3702)
SMEL3Ch01	22205107	22208236	ID=SMEL_001g133410.1	Note=Similar to LEA6: Late embryogenesis abundant protein 6 (Arabidopsis thaliana OX%3D3702)
SMEL3Ch01	22215537	22216340	ID=SMEL_001g133420.1	Note=Similar to AHL21: AT-hook motif nuclear-localized protein 21 (Arabidopsis thaliana OX%3D3702)
SMEL3Ch01	22239663	22241723	ID=SMEL_001g133430.1	Note=Similar to OMT8: Benzoate O-methyltransferase (Zea mays OX%3D4577)
SMEL3Ch01	22407221	22415754	ID=SMEL_001g133440.1	Note=Similar to RGP1: Ras-related protein RGP1 (Oryza sativa subsp. japonica OX%3D39947)
SMEL3Ch01	22429178	22429693	ID=SMEL_001g133450.1	Note=Similar to At1g18250: Thaumatin-like protein (Arabidopsis thaliana OX%3D3702)
SMEL3Ch01	22441315	22442726	ID=SMEL_001g133460.1	Note=Protein of unknown function
SMEL3Ch01	22446800	22449715	ID=SMEL_001g133470.1	Note=Similar to RPM1: Disease resistance protein RPM1 (Arabidopsis thaliana OX%3D3702)
SMEL3Ch01	22451800	22457731	ID=SMEL_001g133480.1	Note=Protein of unknown function
SMEL3Ch01	22458989	22459601	ID=SMEL_001g133490.1	Note=Similar to HTR2: Histone H3.2 (Arabidopsis thaliana OX%3D3702)
SMEL3Ch01	22461573	22469752	ID=SMEL_001g133500.1	Note=Similar to At1g54610: Probable serine/threonine-protein kinase At1g54610 (Arabidopsis thaliana OX%3D3702)
SMEL3Ch01	22471692	22483698	ID=SMEL_001g133510.1	Note=Protein of unknown function
SMEL3Ch01	22497573	22506383	ID=SMEL_001g133520.1	Note=Similar to Furcatin hydrolase (Viburnum furcatum OX%3D237940)
SMEL3Ch01	22527299	22533970	ID=SMEL_001g133530.1	Note=Similar to Furcatin hydrolase (Viburnum furcatum OX%3D237940)
SMEL3Ch01	22551152	22551395	ID=SMEL_001g133540.1	Note=Protein of unknown function
SMEL3Ch01	22556182	22560842	ID=SMEL_001g133550.1	Note=Similar to BGLU12: Beta-glucosidase 12 (Oryza sativa subsp. indica OX%3D39946)
SMEL3Ch01	22583132	22584088	ID=SMEL_001g133560.1	Note=Similar to PHE2: MADS-box transcription factor PHERES 2 (Arabidopsis thaliana OX%3D3702)
SMEL3Ch01	22612526	22616222	ID=SMEL_001g133570.1	Note=Protein of unknown function
SMEL3Ch01	22629655	22633716	ID=SMEL_001g133580.1	Note=Similar to OFUT20: O-fucosyltransferase 20 (Arabidopsis thaliana OX%3D3702)
SMEL3Ch01	22636336	22640617	ID=SMEL_001g133590.1	Note=Protein of unknown function
SMEL3Ch01	22668069	22669412	ID=SMEL_001g133600.1	Note=Similar to GSTU8: Glutathione S-transferase U8 (Arabidopsis thaliana OX%3D3702)
SMEL3Ch01	22669461	22675711	ID=SMEL_001g133610.1	Note=Similar to SYN3: Sister chromatid cohesion 1 protein 3 (Arabidopsis thaliana OX%3D3702)
SMEL3Ch01	22684149	22686602	ID=SMEL_001g133620.1	Note=Similar to FTIP3: FT-interacting protein 3 (Arabidopsis thaliana OX%3D3702)
SMEL3Ch01	22689570	22709649	ID=SMEL_001g133630.1	Note=Similar to NRPA2: DNA-directed RNA polymerase I subunit 2 (Arabidopsis thaliana OX%3D3702)
SMEL3Ch01	22710025	22713369	ID=SMEL_001g133640.1	Note=Similar to FTIP1: FT-interacting protein 1 (Arabidopsis thaliana OX%3D3702)
SMEL3Ch01	22718339	22719364	ID=SMEL_001g133650.1	Note=Similar to At3g26670: Probable magnesium transporter NIPA8 (Arabidopsis thaliana OX%3D3702)
SMEL3Ch01	22730350	22742940	ID=SMEL_001g133660.1	Note=Similar to GFA2: Chaperone protein dnaJ GFA2%2C mitochondrial (Arabidopsis thaliana OX%3D3702)
SMEL3Ch01	22752418	22759691	ID=SMEL_001g133670.1	Note=Similar to ASAT3: Acylsugar acyltransferase 3 (Solanum lycopersicum OX%3D4081)
SMEL3Ch01	22762793	22785105	ID=SMEL_001g133680.1	Note=Similar to FMT: Clustered mitochondria protein (Arabidopsis thaliana OX%3D3702)
SMEL3Ch01	22836240	22836974	ID=SMEL_001g133690.1	Note=Protein of unknown function
SMEL3Ch01	22837792	22838388	ID=SMEL_001g133700.1	Note=Similar to HTR2: Histone H3.2 (Arabidopsis thaliana OX%3D3702)
SMEL3Ch01	22849777	22850970	ID=SMEL_001g133710.1	Note=Similar to LRX4: Leucine-rich repeat extensin-like protein 4 (Arabidopsis thaliana OX%3D3702)
SMEL3Ch01	22855459	22860372	ID=SMEL_001g133720.1	Note=Similar to RPM1: Disease resistance protein RPM1 (Arabidopsis thaliana OX%3D3702)
SMEL3Ch01	22865192	22874616	ID=SMEL_001g133730.1	Note=Similar to EML3: Protein EMSY-LIKE 3 (Arabidopsis thaliana OX%3D3702)
SMEL3Ch01	22881274	22885344	ID=SMEL_001g133740.1	Note=Similar to GTE9: Transcription factor GTE9 (Arabidopsis thaliana OX%3D3702)
SMEL3Ch01	22908001	22908861	ID=SMEL_001g133750.1	Note=Protein of unknown function
SMEL3Ch01	22910957	22914403	ID=SMEL_001g133760.1	Note=Similar to Os02g0194200: Zinc finger CCCH domain-containing protein 14 (Oryza sativa subsp. japonica OX%3D39947)
SMEL3Ch01	22914819	22921821	ID=SMEL_001g133770.1	Note=Similar to NTAN1: Protein N-terminal asparagine amidohydrolase (Arabidopsis thaliana OX%3D3702)
SMEL3Ch01	22923339	22936746	ID=SMEL_001g133780.1	Note=Protein of unknown function
SMEL3Ch01	22946913	22951184	ID=SMEL_001g133790.1	Note=Similar to HAT14: Homeobox-leucine zipper protein HAT14 (Arabidopsis thaliana OX%3D3702)
SMEL3Ch01	22963224	22963864	ID=SMEL_001g133800.1	Note=Similar to FRS10: Putative protein FAR1-RELATED SEQUENCE 10 (Arabidopsis thaliana OX%3D3702)
SMEL3Ch01	22969125	22969793	ID=SMEL_001g133810.1	Note=Protein of unknown function
SMEL3Ch01	22984884	22986170	ID=SMEL_001g133820.1	Note=Similar to RMA1H1: E3 ubiquitin-protein ligase RMA1H1 (Capsicum annuum OX%3D4072)
SMEL3Ch01	22990459	22991831	ID=SMEL_001g133830.1	Note=Protein of unknown function
SMEL3Ch01	23022827	23029894	ID=SMEL_001g133840.1	Note=Protein of unknown function
SMEL3Ch01	23036326	23037027	ID=SMEL_001g133850.1	Note=Protein of unknown function
SMEL3Ch01	23043807	23045492	ID=SMEL_001g133860.1	Note=Protein of unknown function
SMEL3Ch01	23058385	23060070	ID=SMEL_001g133870.1	Note=Protein of unknown function
SMEL3Ch01	23072352	23073110	ID=SMEL_001g133880.1	Note=Protein of unknown function
SMEL3Ch01	23074496	23075290	ID=SMEL_001g133890.1	Note=Protein of unknown function
SMEL3Ch01	23078494	23079219	ID=SMEL_001g133900.1	Note=Protein of unknown function
SMEL3Ch01	23083894	23084628	ID=SMEL_001g133910.1	Note=Protein of unknown function
SMEL3Ch01	23291089	23293349	ID=SMEL_001g133920.1	Note=Protein of unknown function
SMEL3Ch01	23302187	23304678	ID=SMEL_001g133930.1	Note=Similar to VHA-D: V-type proton ATPase subunit D (Arabidopsis thaliana OX%3D3702)
SMEL3Ch01	23306574	23306930	ID=SMEL_001g133940.1	Note=Protein of unknown function
SMEL3Ch01	23315795	23317991	ID=SMEL_001g133950.1	Note=Similar to YLS3: Protein YLS3 (Arabidopsis thaliana OX%3D3702)
SMEL3Ch01	23320474	23323814	ID=SMEL_001g133960.1	Note=Protein of unknown function
SMEL3Ch01	23334535	23335474	ID=SMEL_001g133970.1	Note=Protein of unknown function
SMEL3Ch01	23340317	23348285	ID=SMEL_001g133980.1	Note=Protein of unknown function
SMEL3Ch01	23351793	23353208	ID=SMEL_001g133990.1	Note=Similar to ycf2-A: Protein Ycf2 (Solanum bulbocastanum OX%3D147425)
SMEL3Ch01	23368068	23376795	ID=SMEL_001g134000.1	Note=Similar to NPP5: Serine/threonine-protein phosphatase PP2A-5 catalytic subunit (Nicotiana tabacum OX%3D4097)
SMEL3Ch01	23384574	23388221	ID=SMEL_001g134010.1	Note=Protein of unknown function
SMEL3Ch01	23388756	23397720	ID=SMEL_001g134020.1	Note=Similar to UFC: Protein UPSTREAM OF FLC (Arabidopsis thaliana OX%3D3702)
SMEL3Ch01	23423972	23426426	ID=SMEL_001g134030.1	Note=Protein of unknown function
SMEL3Ch01	23435984	23439354	ID=SMEL_001g134040.1	Note=Similar to HEXO2: Beta-hexosaminidase 2 (Arabidopsis thaliana OX%3D3702)
SMEL3Ch01	23440184	23443332	ID=SMEL_001g134050.1	Note=Similar to LTP8: Non-specific lipid-transfer protein 8 (Arabidopsis thaliana OX%3D3702)
SMEL3Ch01	23447146	23450380	ID=SMEL_001g134060.1	Note=Protein of unknown function
SMEL3Ch01	23474931	23556949	ID=SMEL_001g134070.1	Note=Protein of unknown function
SMEL3Ch01	23582575	23588055	ID=SMEL_001g134080.1	Note=Similar to PCMP-H42: Pentatricopeptide repeat-containing protein At4g13650 (Arabidopsis thaliana OX%3D3702)
SMEL3Ch01	23599187	23611550	ID=SMEL_001g134090.1	Note=Similar to XI-F: Myosin-12 (Arabidopsis thaliana OX%3D3702)
SMEL3Ch01	23613988	23616765	ID=SMEL_001g134100.1	Note=Similar to ANN3: Annexin D3 (Arabidopsis thaliana OX%3D3702)
SMEL3Ch01	23630056	23644015	ID=SMEL_001g134110.1	Note=Similar to UGPA: UTP--glucose-1-phosphate uridylyltransferase (Musa acuminata OX%3D4641)
SMEL3Ch01	23644202	23646482	ID=SMEL_001g134120.1	Note=Similar to At1g71170: Probable 3-hydroxyisobutyrate dehydrogenase-like 2%2C mitochondrial (Arabidopsis thaliana OX%3D3702)
SMEL3Ch01	23647669	23647809	ID=SMEL_001g134130.1	Note=Protein of unknown function
SMEL3Ch01	23650808	23655588	ID=SMEL_001g134140.1	Note=Similar to LHP1: Chromo domain protein LHP1 (Solanum lycopersicum OX%3D4081)
SMEL3Ch01	23668391	23672414	ID=SMEL_001g134150.1	Note=Similar to SIGB: RNA polymerase sigma factor sigB (Arabidopsis thaliana OX%3D3702)
SMEL3Ch01	23676738	23679951	ID=SMEL_001g134160.1	Note=Protein of unknown function
SMEL3Ch01	23681843	23693182	ID=SMEL_001g134170.1	Note=Similar to COQ5: 2-methoxy-6-polyprenyl-1%2C4-benzoquinol methylase%2C mitochondrial (Oryza sativa subsp. japonica OX%3D39947)
SMEL3Ch01	23694098	23703307	ID=SMEL_001g134180.1	Note=Similar to At5g24840: tRNA (guanine-N(7)-)-methyltransferase (Arabidopsis thaliana OX%3D3702)
SMEL3Ch01	23717626	23722154	ID=SMEL_001g134190.1	Note=Protein of unknown function
SMEL3Ch01	23724573	23750689	ID=SMEL_001g134200.1	Note=Protein of unknown function
SMEL3Ch01	23763178	23771438	ID=SMEL_001g134210.1	Note=Protein of unknown function
SMEL3Ch01	23788996	23792463	ID=SMEL_001g134220.1	Note=Similar to NFD4: Protein NUCLEAR FUSION DEFECTIVE 4 (Arabidopsis thaliana OX%3D3702)
SMEL3Ch01	23792708	23795370	ID=SMEL_001g134230.1	Note=Similar to Os04g0386900: B3 domain-containing protein Os04g0386900 (Oryza sativa subsp. japonica OX%3D39947)
SMEL3Ch01	23806920	23810072	ID=SMEL_001g134240.1	Note=Similar to Os04g0386900: B3 domain-containing protein Os04g0386900 (Oryza sativa subsp. japonica OX%3D39947)
SMEL3Ch01	23829229	23831543	ID=SMEL_001g134250.1	Note=Similar to XPT: Xylulose 5-phosphate/phosphate translocator%2C chloroplastic (Arabidopsis thaliana OX%3D3702)
SMEL3Ch01	23837088	23845112	ID=SMEL_001g134260.1	Note=Similar to AUG7: AUGMIN subunit 7 (Arabidopsis thaliana OX%3D3702)
SMEL3Ch01	23847946	23854385	ID=SMEL_001g134270.1	Note=Similar to CDR1: Aspartic proteinase CDR1 (Arabidopsis thaliana OX%3D3702)
SMEL3Ch01	23858093	23880864	ID=SMEL_001g134280.1	Note=Similar to ATJ1: Chaperone protein dnaJ 1%2C mitochondrial (Arabidopsis thaliana OX%3D3702)
SMEL3Ch01	23887452	23889641	ID=SMEL_001g134290.1	Note=Similar to At5g27460: Pentatricopeptide repeat-containing protein At5g27460 (Arabidopsis thaliana OX%3D3702)
SMEL3Ch01	23891178	23892022	ID=SMEL_001g134300.1	Note=Similar to HSP26-A: Probable glutathione S-transferase (Glycine max OX%3D3847)
SMEL3Ch01	23892796	23897980	ID=SMEL_001g134310.1	Note=Similar to PUR7: Phosphoribosylaminoimidazole-succinocarboxamide synthase%2C chloroplastic (Arabidopsis thaliana OX%3D3702)
SMEL3Ch01	23900326	23903388	ID=SMEL_001g134320.1	Note=Similar to PEPKR2: Serine/threonine-protein kinase PEPKR2 (Arabidopsis thaliana OX%3D3702)
SMEL3Ch01	23903890	23907139	ID=SMEL_001g134330.1	Note=Similar to PCMP-H23: Pentatricopeptide repeat-containing protein At3g03580 (Arabidopsis thaliana OX%3D3702)
SMEL3Ch01	23908473	23909416	ID=SMEL_001g134340.1	Note=Protein of unknown function
SMEL3Ch01	23910076	23910162	ID=SMEL_001g134350.1	Note=Protein of unknown function
SMEL3Ch01	23911515	23914813	ID=SMEL_001g134360.1	Note=Similar to PCMP-H24: Pentatricopeptide repeat-containing protein At4g02750 (Arabidopsis thaliana OX%3D3702)
SMEL3Ch01	23916456	23916939	ID=SMEL_001g134370.1	Note=Protein of unknown function
SMEL3Ch01	23920682	23922953	ID=SMEL_001g134380.1	Note=Similar to SKIP25: F-box/kelch-repeat protein SKIP25 (Arabidopsis thaliana OX%3D3702)
SMEL3Ch01	23928367	23929647	ID=SMEL_001g134390.1	Note=Protein of unknown function
SMEL3Ch01	23937516	23939389	ID=SMEL_001g134400.1	Note=Protein of unknown function
SMEL3Ch01	23946965	23952589	ID=SMEL_001g134410.1	Note=Similar to NRPB8B: DNA-directed RNA polymerases II%2C IV and V subunit 8B (Arabidopsis thaliana OX%3D3702)
SMEL3Ch01	23952963	23954861	ID=SMEL_001g134420.1	Note=Similar to At5g17580: BTB/POZ domain-containing protein At5g17580 (Arabidopsis thaliana OX%3D3702)
SMEL3Ch01	23961371	23961631	ID=SMEL_001g134430.1	Note=Protein of unknown function
SMEL3Ch01	23964111	23965940	ID=SMEL_001g134440.1	Note=Similar to PCMP-H12: Pentatricopeptide repeat-containing protein At1g08070%2C chloroplastic (Arabidopsis thaliana OX%3D3702)
SMEL3Ch01	23975682	23979181	ID=SMEL_001g134450.1	Note=Similar to BHLH91: Transcription factor bHLH91 (Arabidopsis thaliana OX%3D3702)
SMEL3Ch01	23982562	23984583	ID=SMEL_001g134460.1	Note=Similar to BHLH91: Transcription factor bHLH91 (Arabidopsis thaliana OX%3D3702)
SMEL3Ch01	23987794	23992294	ID=SMEL_001g134470.1	Note=Similar to RFC3: Replication factor C subunit 3 (Arabidopsis thaliana OX%3D3702)
SMEL3Ch01	23993273	24016932	ID=SMEL_001g134480.1	Note=Protein of unknown function
SMEL3Ch01	24023623	24024051	ID=SMEL_001g134490.1	Note=Similar to HIS2B: Histone H2B (Nicotiana tabacum OX%3D4097)
SMEL3Ch01	24031865	24037321	ID=SMEL_001g134500.1	Note=Similar to XTH30: Probable xyloglucan endotransglucosylase/hydrolase protein 30 (Arabidopsis thaliana OX%3D3702)
SMEL3Ch01	24054934	24099301	ID=SMEL_001g134510.1	Note=Similar to At5g35930: Putative acyl-activating enzyme 19 (Arabidopsis thaliana OX%3D3702)
SMEL3Ch01	24059632	24060156	ID=SMEL_001g134520.1	Note=Protein of unknown function
SMEL3Ch01	24105106	24106995	ID=SMEL_001g134530.1	Note=Similar to ATL51: RING-H2 finger protein ATL51 (Arabidopsis thaliana OX%3D3702)
SMEL3Ch01	24111911	24121046	ID=SMEL_001g134540.1	Note=Protein of unknown function
SMEL3Ch01	24123717	24125600	ID=SMEL_001g134550.1	Note=Similar to ELI1: Pentatricopeptide repeat-containing protein ELI1%2C chloroplastic (Arabidopsis thaliana OX%3D3702)
SMEL3Ch01	24129725	24131764	ID=SMEL_001g134560.1	Note=Similar to At1g50920: Nucleolar GTP-binding protein 1 (Arabidopsis thaliana OX%3D3702)
SMEL3Ch01	24132717	24133718	ID=SMEL_001g134570.1	Note=Similar to At4g16580: Probable protein phosphatase 2C 55 (Arabidopsis thaliana OX%3D3702)
SMEL3Ch01	24134420	24137665	ID=SMEL_001g134580.1	Note=Similar to BAMT: Benzoate carboxyl methyltransferase (Antirrhinum majus OX%3D4151)
SMEL3Ch01	24140920	24144165	ID=SMEL_001g134590.1	Note=Similar to BAMT: Benzoate carboxyl methyltransferase (Antirrhinum majus OX%3D4151)
SMEL3Ch01	24155495	24156544	ID=SMEL_001g134600.1	Note=Protein of unknown function
SMEL3Ch01	24158968	24159786	ID=SMEL_001g134610.1	Note=Protein of unknown function
SMEL3Ch01	24161278	24205195	ID=SMEL_001g134620.1	Note=Similar to CALS2: Callose synthase 2 (Arabidopsis thaliana OX%3D3702)
SMEL3Ch01	24210014	24218460	ID=SMEL_001g134630.1	Note=Similar to CS: Citrate synthase%2C mitochondrial (Daucus carota OX%3D4039)
SMEL3Ch01	24221209	24221532	ID=SMEL_001g134640.1	Note=Protein of unknown function
SMEL3Ch01	24228988	24238384	ID=SMEL_001g134650.1	Note=Similar to CNX2: GTP 3'%2C8-cyclase%2C mitochondrial (Arabidopsis thaliana OX%3D3702)
SMEL3Ch01	24256494	24256973	ID=SMEL_001g134660.1	Note=Similar to VQ25: VQ motif-containing protein 25 (Arabidopsis thaliana OX%3D3702)
SMEL3Ch01	24281023	24281271	ID=SMEL_001g134670.1	Note=Protein of unknown function
SMEL3Ch01	24285996	24286259	ID=SMEL_001g134680.1	Note=Protein of unknown function
SMEL3Ch01	24289039	24289458	ID=SMEL_001g134690.1	Note=Protein of unknown function
SMEL3Ch01	24293613	24296683	ID=SMEL_001g134700.1	Note=Similar to At5g57480: AAA-ATPase At5g57480 (Arabidopsis thaliana OX%3D3702)
SMEL3Ch01	24357100	24357574	ID=SMEL_001g134710.1	Note=Protein of unknown function
SMEL3Ch01	24364115	24364580	ID=SMEL_001g134720.1	Note=Similar to VPS18: Vacuolar sorting protein 18 (Arabidopsis thaliana OX%3D3702)
SMEL3Ch01	24368098	24370860	ID=SMEL_001g134730.1	Note=Similar to GR1: Protein gamma response 1 (Arabidopsis thaliana OX%3D3702)
SMEL3Ch01	24386682	24387788	ID=SMEL_001g134740.1	Note=Similar to DRT100: DNA damage-repair/toleration protein DRT100 (Arabidopsis thaliana OX%3D3702)
SMEL3Ch01	24393718	24403336	ID=SMEL_001g134750.1	Note=Protein of unknown function
SMEL3Ch01	24416465	24427246	ID=SMEL_001g134760.1	Note=Similar to At3g52120: SURP and G-patch domain-containing protein 1-like protein (Arabidopsis thaliana OX%3D3702)
SMEL3Ch01	24434956	24437433	ID=SMEL_001g134770.1	Note=Similar to BHLH130: Transcription factor bHLH130 (Arabidopsis thaliana OX%3D3702)
SMEL3Ch01	24447477	24455985	ID=SMEL_001g134780.1	Note=Protein of unknown function
SMEL3Ch01	24506773	24516456	ID=SMEL_001g134790.1	Note=Protein of unknown function
SMEL3Ch01	24521585	24528576	ID=SMEL_001g134800.1	Note=Similar to TOP2: DNA topoisomerase 2 (Arabidopsis thaliana OX%3D3702)
SMEL3Ch01	24529601	24536077	ID=SMEL_001g134810.1	Note=Similar to OBE4: Protein OBERON 4 (Arabidopsis thaliana OX%3D3702)
SMEL3Ch01	24543416	24545066	ID=SMEL_001g134820.1	Note=Similar to FKBP42: Peptidyl-prolyl cis-trans isomerase FKBP42 (Arabidopsis thaliana OX%3D3702)
SMEL3Ch01	24555353	24558321	ID=SMEL_001g134830.1	Note=Similar to FKBP42: Peptidyl-prolyl cis-trans isomerase FKBP42 (Arabidopsis thaliana OX%3D3702)
SMEL3Ch01	24596436	24598889	ID=SMEL_001g134840.1	Note=Similar to At2g34740: Probable protein phosphatase 2C 28 (Arabidopsis thaliana OX%3D3702)
SMEL3Ch01	24606040	24625254	ID=SMEL_001g134850.1	Note=Protein of unknown function
SMEL3Ch01	24636080	24652339	ID=SMEL_001g134860.1	Note=Protein of unknown function
SMEL3Ch01	24656839	24668999	ID=SMEL_001g134870.1	Note=Similar to EHD3: PHD finger protein EHD3 (Oryza sativa subsp. japonica OX%3D39947)
SMEL3Ch01	24678370	24685791	ID=SMEL_001g134880.1	Note=Protein of unknown function
SMEL3Ch01	24700899	24700976	ID=SMEL_001g134890.1	Note=Protein of unknown function
SMEL3Ch01	24727126	24744023	ID=SMEL_001g134900.1	Note=Protein of unknown function
SMEL3Ch01	24768274	24785816	ID=SMEL_001g134910.1	Note=Protein of unknown function
SMEL3Ch01	24788472	24788759	ID=SMEL_001g134920.1	Note=Protein of unknown function
SMEL3Ch01	24793924	24804666	ID=SMEL_001g134930.1	Note=Protein of unknown function
SMEL3Ch01	24858122	24883726	ID=SMEL_001g134940.1	Note=Similar to ATX3: Histone-lysine N-methyltransferase ATX3 (Arabidopsis thaliana OX%3D3702)
SMEL3Ch01	24890614	24899356	ID=SMEL_001g134950.1	Note=Protein of unknown function
SMEL3Ch01	24922428	24929859	ID=SMEL_001g134960.1	Note=Protein of unknown function
SMEL3Ch01	24930150	24934271	ID=SMEL_001g134970.1	Note=Similar to Polygalacturonase (Actinidia deliciosa OX%3D3627)
SMEL3Ch01	24947762	24967785	ID=SMEL_001g134980.1	Note=Similar to CCD1: Carotenoid 9%2C10(9'%2C10')-cleavage dioxygenase 1 (Pisum sativum OX%3D3888)
[truncated: 26,436 more rows]

## Sheet: P-ACH 3.1
Supplementary Table S5 Chromosomal locations and annotations of the genes underlying the confidence interval of each mQTL or mQTL cluster (Barchi et al., 2019). For each gene, the SNPEff output is reported for the 305E40 allelic variant with respect to the reference 67/3 one.
Ch	Start	END	Gene	Annotation	HIGH	MODERATE	LOW	MODIFIER	3_prime_UTR_variant	5_prime_UTR_premature_start_codon_gain_variant	5_prime_UTR_variant	conservative_inframe_deletion	conservative_inframe_insertion	disruptive_inframe_deletion	disruptive_inframe_insertion	downstream_gene_variant	frameshift_variant	intron_variant	missense_variant	non_coding_transcript_variant	splice_donor_variant	splice_region_variant	start_lost	stop_gained	stop_lost	stop_retained_variant	synonymous_variant	upstream_gene_variant
SMEL3Ch03	76975356	76976934	SMEL_003g182830.1	Similar to ND4: NADH-ubiquinone oxidoreductase chain 4 (Arabidopsis thaliana OX%3D3702)	0	2	0	11	0	0	0	0	0	0	0	8	0	1	2	0	0	0	0	0	0	0	0	2
SMEL3Ch03	76977991	76978844	SMEL_003g182840.1	Similar to MMD1: PHD finger protein MALE MEIOCYTE DEATH 1 (Arabidopsis thaliana OX%3D3702)	0	0	1	11	0	0	0	0	0	0	0	0	0	1	0	0	0	0	0	0	0	0	1	10
SMEL3Ch03	75827274	75830210	SMEL_003g182640.1	Similar to CPK17: Calcium-dependent protein kinase 17 (Arabidopsis thaliana OX%3D3702)	0	0	0	5	0	0	0	0	0	0	0	0	0	0	0	0	0	0	0	0	0	0	0	5
SMEL3Ch03	75924888	75925214	SMEL_003g182660.1	Protein of unknown function	0	0	0	11	0	0	0	0	0	0	0	11	0	0	0	0	0	0	0	0	0	0	0	0
SMEL3Ch03	76206516	76207658	SMEL_003g182690.1	Protein of unknown function	0	0	0	5	0	0	0	0	0	0	0	5	0	0	0	0	0	0	0	0	0	0	0	0
SMEL3Ch03	76250863	76251018	SMEL_003g182700.1	Protein of unknown function	0	0	0	7	0	0	0	0	0	0	0	7	0	0	0	0	0	0	0	0	0	0	0	0
SMEL3Ch03	76321285	76322036	SMEL_003g182710.1	Protein of unknown function	0	0	0	2	0	0	0	0	0	0	0	0	0	0	0	0	0	0	0	0	0	0	0	2
SMEL3Ch03	76321670	76321954	SMEL_003g182720.1	Protein of unknown function	0	0	0	2	0	0	0	0	0	0	0	2	0	0	0	0	0	0	0	0	0	0	0	0
SMEL3Ch03	76325551	76328250	SMEL_003g182730.1	Similar to DOF2.1: Dof zinc finger protein DOF2.1 (Arabidopsis thaliana OX%3D3702)	0	0	0	2	0	0	0	0	0	0	0	2	0	0	0	0	0	0	0	0	0	0	0	0
SMEL3Ch03	76875918	76883428	SMEL_003g182740.1	Similar to TIC32: Short-chain dehydrogenase TIC 32%2C chloroplastic (Pisum sativum OX%3D3888)	0	0	0	9	0	0	0	0	0	0	0	4	0	5	0	0	0	0	0	0	0	0	0	0
SMEL3Ch03	76885673	76900233	SMEL_003g182750.1	Similar to TIC32: Short-chain dehydrogenase TIC 32%2C chloroplastic (Pisum sativum OX%3D3888)	0	0	0	2	0	0	0	0	0	0	0	0	0	0	0	0	0	0	0	0	0	0	0	2
SMEL3Ch03	76888050	76888793	SMEL_003g182760.1	Protein of unknown function	0	0	0	6	0	0	0	0	0	0	0	4	0	0	0	0	0	0	0	0	0	0	0	2
SMEL3Ch03	76917365	76927910	SMEL_003g182790.1	Similar to YDA: Mitogen-activated protein kinase kinase kinase YODA (Arabidopsis thaliana OX%3D3702)	0	0	0	23	0	0	0	0	0	0	0	0	0	0	0	0	0	0	0	0	0	0	0	23
SMEL3Ch03	76954424	76956280	SMEL_003g182800.1	Similar to LSI2: Silicon efflux transporter LSI2 (Oryza sativa subsp. japonica OX%3D39947)	0	0	0	1	0	0	0	0	0	0	0	1	0	0	0	0	0	0	0	0	0	0	0	0
SMEL3Ch03	76965259	76966358	SMEL_003g182810.1	Protein of unknown function	0	0	0	56	0	0	0	0	0	0	0	1	0	0	0	0	0	0	0	0	0	0	0	55
SMEL3Ch03	76968530	76973191	SMEL_003g182820.1	Similar to At3g49070: UPF0496 protein At3g49070 (Arabidopsis thaliana OX%3D3702)	0	0	0	12	0	0	0	0	0	0	0	11	0	1	0	0	0	0	0	0	0	0	0	0
SMEL3Ch03	76986703	76990023	SMEL_003g182850.1	Similar to DCR: BAHD acyltransferase DCR (Arabidopsis thaliana OX%3D3702)	0	0	0	1	0	0	0	0	0	0	0	1	0	0	0	0	0	0	0	0	0	0	0	0
SMEL3Ch03	76996618	77007479	SMEL_003g182860.1	Similar to TATB: Sec-independent protein translocase protein TATB%2C chloroplastic (Pisum sativum OX%3D3888)	0	0	0	1	0	0	0	0	0	0	0	1	0	0	0	0	0	0	0	0	0	0	0	0
SMEL3Ch03	77024074	77045357	SMEL_003g182880.1	Similar to RRC1: Protein RRC1 (Arabidopsis thaliana OX%3D3702)	0	0	0	1	0	0	0	0	0	0	0	0	0	0	0	0	0	0	0	0	0	0	0	1
SMEL3Ch03	77051526	77054554	SMEL_003g182890.1	Similar to MED36A: Mediator of RNA polymerase II transcription subunit 36a (Arabidopsis thaliana OX%3D3702)	0	0	0	1	0	0	0	0	0	0	0	0	0	0	0	0	0	0	0	0	0	0	0	1
SMEL3Ch03	75822683	75823521	SMEL_003g182630.1	Protein of unknown function
SMEL3Ch03	75913042	75921417	SMEL_003g182650.1	Similar to ZFWD1: Zinc finger CCCH domain-containing protein 48 (Arabidopsis thaliana OX%3D3702)
SMEL3Ch03	75937406	75937741	SMEL_003g182670.1	Protein of unknown function
SMEL3Ch03	76200559	76205103	SMEL_003g182680.1	Similar to DAW1: Dynein assembly factor with WDR repeat domains 1 (Chlamydomonas reinhardtii OX%3D3055)
SMEL3Ch03	76900327	76902617	SMEL_003g182770.1	Similar to PER52: Peroxidase 52 (Arabidopsis thaliana OX%3D3702)
SMEL3Ch03	76910848	76917244	SMEL_003g182780.1	Similar to TIC32: Short-chain dehydrogenase TIC 32%2C chloroplastic (Pisum sativum OX%3D3888)
SMEL3Ch03	77018676	77023655	SMEL_003g182870.1	Similar to At1g76660: Uncharacterized protein At1g76660 (Arabidopsis thaliana OX%3D3702)

## Sheet: P-UNKN 4
Ch	Start	END	Gene	Annotation	HIGH	MODERATE	LOW	MODIFIER	3_prime_UTR_variant	5_prime_UTR_premature_start_codon_gain_variant	5_prime_UTR_variant	conservative_inframe_deletion	conservative_inframe_insertion	disruptive_inframe_deletion	disruptive_inframe_insertion	downstream_gene_variant	frameshift_variant	intron_variant	missense_variant	non_coding_transcript_variant	splice_donor_variant	splice_region_variant	start_lost	stop_gained	stop_lost	stop_retained_variant	synonymous_variant	upstream_gene_variant
SMEL3Ch04	2840774	2847652	SMEL_004g202040.1	Similar to SD18: Receptor-like serine/threonine-protein kinase SD1-8 (Arabidopsis thaliana OX%3D3702)	0	19	6	47	6	0	0	0	0	0	0	7	0	29	19	0	0	1	0	0	0	0	5	6
SMEL3Ch04	2825799	2831195	SMEL_004g202030.1	Similar to SD11: G-type lectin S-receptor-like serine/threonine-protein kinase SD1-1 (Arabidopsis thaliana OX%3D3702)	0	18	16	41	0	0	0	0	0	0	0	5	0	36	18	0	0	0	0	0	0	0	16	0
SMEL3Ch04	2936386	2939691	SMEL_004g202090.1	Similar to PHOS34: Universal stress protein PHOS34 (Arabidopsis thaliana OX%3D3702)	0	14	7	10	0	0	0	0	0	0	0	3	0	0	14	0	0	0	0	0	0	0	7	7
SMEL3Ch04	2914005	2915835	SMEL_004g202050.1	Similar to PCMP-E6: Pentatricopeptide repeat-containing protein At4g22760 (Arabidopsis thaliana OX%3D3702)	0	7	3	16	0	0	3	0	0	0	0	9	0	0	7	0	0	0	0	0	0	0	3	4
SMEL3Ch04	3020932	3027635	SMEL_004g202150.1	Similar to CNGC4: Cyclic nucleotide-gated ion channel 4 (Arabidopsis thaliana OX%3D3702)	0	3	0	8	0	0	0	0	0	0	0	0	0	6	3	0	0	0	0	0	0	0	0	2
SMEL3Ch04	2924438	2925688	SMEL_004g202070.1	Similar to rpoB: DNA-directed RNA polymerase subunit beta (Solanum tuberosum OX%3D4113)	0	2	0	22	0	0	0	0	0	0	0	12	0	0	2	0	0	0	0	0	0	0	0	10
SMEL3Ch04	3093369	3100847	SMEL_004g202190.1	Similar to AGD5: ADP-ribosylation factor GTPase-activating protein AGD5 (Arabidopsis thaliana OX%3D3702)	0	1	2	42	1	0	0	0	0	0	0	12	0	15	1	0	0	0	0	0	0	0	2	14
SMEL3Ch04	3194718	3198295	SMEL_004g202270.1	Similar to CBSX5: CBS domain-containing protein CBSX5 (Arabidopsis thaliana OX%3D3702)	0	1	0	113	0	0	0	0	0	0	0	18	0	1	1	0	0	0	0	0	0	0	0	94
SMEL3Ch04	2986913	2997128	SMEL_004g202130.1	Similar to CNGC4: Cyclic nucleotide-gated ion channel 4 (Arabidopsis thaliana OX%3D3702)	0	0	2	25	0	0	0	0	0	0	0	7	0	17	0	0	0	0	0	0	0	0	2	1
SMEL3Ch04	3084603	3092253	SMEL_004g202180.1	Similar to VAL2: B3 domain-containing transcription repressor VAL2 (Arabidopsis thaliana OX%3D3702)	0	0	1	80	5	0	0	0	0	0	0	13	0	21	0	0	0	1	0	0	0	0	0	42
SMEL3Ch04	3288315	3291937	SMEL_004g202370.1	Similar to GLCAT14A: Beta-glucuronosyltransferase GlcAT14A (Arabidopsis thaliana OX%3D3702)	0	0	1	26	0	0	0	0	0	0	0	22	0	2	0	0	0	0	0	0	0	0	1	2
SMEL3Ch04	2922592	2922936	SMEL_004g202060.1	Similar to PBP1: Calcium-binding protein PBP1 (Arabidopsis thaliana OX%3D3702)	0	0	0	19	0	0	0	0	0	0	0	8	0	0	0	0	0	0	0	0	0	0	0	11
SMEL3Ch04	2927852	2929375	SMEL_004g202080.1	Similar to MIP1A: B-box domain protein 30 (Arabidopsis thaliana OX%3D3702)	0	0	0	19	2	0	1	0	0	0	0	6	0	4	0	0	0	0	0	0	0	0	0	6
SMEL3Ch04	2944412	2947591	SMEL_004g202100.1	Similar to SPT16: FACT complex subunit SPT16 (Zea mays OX%3D4577)	0	0	0	21	0	0	0	0	0	0	0	0	0	0	0	0	0	0	0	0	0	0	0	21
SMEL3Ch04	2948492	2958444	SMEL_004g202110.1	Similar to Os02g0599700: Probable protein phosphatase 2C 19 (Oryza sativa subsp. japonica OX%3D39947)	0	0	0	2	0	0	0	0	0	0	0	0	0	0	0	0	0	0	0	0	0	0	0	2
SMEL3Ch04	2962819	2975099	SMEL_004g202120.1	Similar to ABC1K7: Protein ACTIVITY OF BC1 COMPLEX KINASE 7%2C chloroplastic (Arabidopsis thaliana OX%3D3702)	0	0	0	72	0	0	0	0	0	0	0	11	0	59	0	0	0	0	0	0	0	0	0	2
SMEL3Ch04	2999718	3002124	SMEL_004g202140.1	Protein of unknown function	0	0	0	19	0	0	0	0	0	0	0	5	0	0	0	0	0	0	0	0	0	0	0	14
SMEL3Ch04	3030635	3034969	SMEL_004g202160.1	Protein of unknown function	0	0	0	15	0	0	0	0	0	0	0	3	0	1	0	0	0	0	0	0	0	0	0	11
SMEL3Ch04	3057168	3069023	SMEL_004g202170.1	Similar to VIII-2: Myosin-2 (Arabidopsis thaliana OX%3D3702)	0	0	0	12	0	0	0	0	0	0	0	2	0	2	0	0	0	0	0	0	0	0	0	8
SMEL3Ch04	3103709	3106204	SMEL_004g202200.1	Protein of unknown function	0	0	0	21	0	0	0	0	0	0	0	2	0	1	0	0	0	0	0	0	0	0	0	18
SMEL3Ch04	3106709	3109231	SMEL_004g202210.1	Similar to THE1: Receptor-like protein kinase THESEUS 1 (Arabidopsis thaliana OX%3D3702)	0	0	0	5	0	0	0	0	0	0	0	3	0	0	0	0	0	0	0	0	0	0	0	2
SMEL3Ch04	3133423	3133578	SMEL_004g202220.1	Protein of unknown function	0	0	0	6	0	0	0	0	0	0	0	4	0	0	0	0	0	0	0	0	0	0	0	2
SMEL3Ch04	3135096	3135251	SMEL_004g202230.1	Protein of unknown function	0	0	0	6	0	0	0	0	0	0	0	4	0	0	0	0	0	0	0	0	0	0	0	2
SMEL3Ch04	3137615	3141110	SMEL_004g202240.1	Similar to NAC056: NAC transcription factor 56 (Arabidopsis thaliana OX%3D3702)	0	0	0	8	0	0	0	0	0	0	0	1	0	1	0	0	0	0	0	0	0	0	0	6
SMEL3Ch04	3162649	3172095	SMEL_004g202250.1	Similar to WDR5B: COMPASS-like H3K4 histone methylase component WDR5B (Arabidopsis thaliana OX%3D3702)	0	0	0	12	0	0	0	0	0	0	0	0	0	1	0	0	0	0	0	0	0	0	0	11
SMEL3Ch04	3174099	3177758	SMEL_004g202260.1	Similar to PORA: Protochlorophyllide reductase A%2C chloroplastic (Arabidopsis thaliana OX%3D3702)	0	0	0	12	0	0	0	0	0	0	0	11	0	0	0	0	0	0	0	0	0	0	0	1
SMEL3Ch04	3212033	3222275	SMEL_004g202280.1	Similar to IRL6: Plant intracellular Ras-group-related LRR protein 6 (Oryza sativa subsp. japonica OX%3D39947)	0	0	0	1	0	0	0	0	0	0	0	0	0	0	0	0	0	0	0	0	0	0	0	1
SMEL3Ch04	3281222	3281719	SMEL_004g202360.1	Protein of unknown function	0	0	0	33	0	0	0	0	0	0	0	4	0	0	0	0	0	0	0	0	0	0	0	29
SMEL3Ch04	3296223	3309326	SMEL_004g202380.1	Similar to VIT_19s0014g02480: Probable bifunctional methylthioribulose-1-phosphate dehydratase/enolase-phosphatase E1 1 (Vitis vinifera OX%3D29760)	0	0	0	10	0	0	0	0	0	0	0	1	0	4	0	0	0	0	0	0	0	0	0	5
SMEL3Ch04	3314850	3316240	SMEL_004g202390.1	Similar to ENODL1: Early nodulin-like protein 1 (Oryza sativa subsp. japonica OX%3D39947)	0	0	0	4	0	0	0	0	0	0	0	4	0	0	0	0	0	0	0	0	0	0	0	0
SMEL3Ch04	3232545	3233870	SMEL_004g202290.1	Similar to At1g15680: Putative F-box/kelch-repeat protein At1g15680 (Arabidopsis thaliana OX%3D3702)
SMEL3Ch04	3235761	3236552	SMEL_004g202300.1	Similar to RMA1H1: E3 ubiquitin-protein ligase RMA1H1 (Capsicum annuum OX%3D4072)
SMEL3Ch04	3245333	3247826	SMEL_004g202310.1	Similar to At3g15360: Thioredoxin M4%2C chloroplastic (Arabidopsis thaliana OX%3D3702)
SMEL3Ch04	3248750	3253265	SMEL_004g202320.1	Similar to KDSB: 3-deoxy-manno-octulosonate cytidylyltransferase%2C mitochondrial (Arabidopsis thaliana OX%3D3702)
SMEL3Ch04	3253619	3263200	SMEL_004g202330.1	Similar to URT1: UTP:RNA uridylyltransferase 1 (Arabidopsis thaliana OX%3D3702)
SMEL3Ch04	3264519	3270570	SMEL_004g202340.1	Similar to UBC26: Probable ubiquitin-conjugating enzyme E2 26 (Arabidopsis thaliana OX%3D3702)
SMEL3Ch04	3273135	3273374	SMEL_004g202350.1	Similar to COX17-1: Cytochrome c oxidase copper chaperone 1 (Arabidopsis thaliana OX%3D3702)

## Sheet: F-DEM 5.1
Ch	Start	END	Gene	Annotation	HIGH	MODERATE	LOW	MODIFIER	3_prime_UTR_variant	5_prime_UTR_premature_start_codon_gain_variant	5_prime_UTR_variant	conservative_inframe_deletion	conservative_inframe_insertion	disruptive_inframe_deletion	disruptive_inframe_insertion	downstream_gene_variant	frameshift_variant	intron_variant	missense_variant	non_coding_transcript_variant	splice_donor_variant	splice_region_variant	start_lost	stop_gained	stop_lost	stop_retained_variant	synonymous_variant	upstream_gene_variant
SMEL3Ch05	8126639	8129559	SMEL_005g229780.1	Protein of unknown function	0	2	3	31	0	0	0	0	0	0	0	20	0	6	2	0	0	0	0	0	0	0	3	5
SMEL3Ch05	7894048	7895481	SMEL_005g229640.1	Similar to ycf2-A: Protein Ycf2 A (Atropa belladonna OX%3D33113)	0	1	0	1	0	0	0	0	0	0	0	0	0	0	1	0	0	0	0	0	0	0	0	1
SMEL3Ch05	7746930	7769818	SMEL_005g229530.1	Similar to SAC3A: SAC3 family protein A (Arabidopsis thaliana OX%3D3702)	0	0	0	4	0	0	0	0	0	0	0	0	0	4	0	0	0	0	0	0	0	0	0	0
SMEL3Ch05	7772150	7777005	SMEL_005g229540.1	Similar to RS2Z32: Serine/arginine-rich splicing factor RS2Z32 (Arabidopsis thaliana OX%3D3702)	0	0	0	25	0	0	0	0	0	0	0	25	0	0	0	0	0	0	0	0	0	0	0	0
SMEL3Ch05	7784956	7789046	SMEL_005g229550.1	Protein of unknown function	0	0	0	25	0	0	0	0	0	0	0	0	0	0	0	0	0	0	0	0	0	0	0	25
SMEL3Ch05	7789542	7797582	SMEL_005g229560.1	Similar to NLP2: Nitrilase-like protein 2 (Arabidopsis thaliana OX%3D3702)	0	0	0	33	0	0	0	0	0	0	0	0	0	0	0	0	0	0	0	0	0	0	0	33
SMEL3Ch05	7808249	7816917	SMEL_005g229570.1	Similar to PEX12: Peroxisome biogenesis protein 12 (Arabidopsis thaliana OX%3D3702)	0	0	0	14	0	0	0	0	0	0	0	1	0	0	0	0	0	0	0	0	0	0	0	13
SMEL3Ch05	7817476	7820553	SMEL_005g229580.1	Similar to MORF5: Multiple organellar RNA editing factor 5%2C chloroplastic/mitochondrial (Arabidopsis thaliana OX%3D3702)	0	0	0	5	0	0	0	0	0	0	0	4	0	0	0	0	0	0	0	0	0	0	0	1
SMEL3Ch05	7821093	7828253	SMEL_005g229590.1	Protein of unknown function	0	0	0	5	0	0	0	0	0	0	0	1	0	4	0	0	0	0	0	0	0	0	0	0
SMEL3Ch05	7833614	7843480	SMEL_005g229600.1	Similar to B''BETA: Serine/threonine protein phosphatase 2A regulatory subunit B''beta (Arabidopsis thaliana OX%3D3702)	0	0	0	1	0	0	0	0	0	0	0	0	0	0	0	0	0	0	0	0	0	0	0	1
SMEL3Ch05	7861781	7867389	SMEL_005g229610.1	Similar to NFS2: Cysteine desulfurase 1%2C chloroplastic (Arabidopsis thaliana OX%3D3702)	0	0	0	1	0	0	0	0	0	0	0	0	0	0	0	0	0	0	0	0	0	0	0	1
SMEL3Ch05	7867906	7872250	SMEL_005g229620.1	Protein of unknown function	0	0	0	1	0	0	0	0	0	0	0	0	0	0	0	0	0	0	0	0	0	0	0	1
SMEL3Ch05	7893138	7893963	SMEL_005g229630.1	Similar to LSH6: Protein LIGHT-DEPENDENT SHORT HYPOCOTYLS 6 (Arabidopsis thaliana OX%3D3702)	0	0	0	2	0	0	0	0	0	0	0	1	0	0	0	0	0	0	0	0	0	0	0	1
SMEL3Ch05	7926457	7933448	SMEL_005g229680.1	Similar to Os03g0268000: Serine/threonine-protein phosphatase PP1 (Oryza sativa subsp. japonica OX%3D39947)	0	0	0	7	0	0	0	0	0	0	0	0	0	0	0	0	0	0	0	0	0	0	0	7
SMEL3Ch05	7966705	7970445	SMEL_005g229690.1	Similar to EIN4: Protein EIN4 (Arabidopsis thaliana OX%3D3702)	0	0	0	2	0	0	0	0	0	0	0	0	0	0	0	0	0	0	0	0	0	0	0	2
SMEL3Ch05	7969838	7970110	SMEL_005g229700.1	Protein of unknown function	0	0	0	2	0	0	0	0	0	0	0	2	0	0	0	0	0	0	0	0	0	0	0	0
SMEL3Ch05	7989533	7989853	SMEL_005g229710.1	Protein of unknown function	0	0	0	6	0	0	0	0	0	0	0	5	0	0	0	0	0	0	0	0	0	0	0	1
SMEL3Ch05	7992690	7992950	SMEL_005g229720.1	Protein of unknown function	0	0	0	5	0	0	0	0	0	0	0	5	0	0	0	0	0	0	0	0	0	0	0	0
SMEL3Ch05	7995636	8014524	SMEL_005g229730.1	Similar to UBP12: Ubiquitin carboxyl-terminal hydrolase 12 (Arabidopsis thaliana OX%3D3702)	0	0	0	6	0	0	0	0	0	0	0	5	0	0	0	0	0	0	0	0	0	0	0	1
SMEL3Ch05	8017015	8028752	SMEL_005g229740.1	Similar to UBP12: Ubiquitin carboxyl-terminal hydrolase 12 (Arabidopsis thaliana OX%3D3702)	0	0	0	1	0	0	0	0	0	0	0	1	0	0	0	0	0	0	0	0	0	0	0	0
SMEL3Ch05	8039067	8042144	SMEL_005g229750.1	Similar to UBP12: Ubiquitin carboxyl-terminal hydrolase 12 (Arabidopsis thaliana OX%3D3702)	0	0	0	8	0	0	0	0	0	0	0	0	0	0	0	0	0	0	0	0	0	0	0	8
SMEL3Ch05	8071505	8073808	SMEL_005g229760.1	Similar to UBP12: Ubiquitin carboxyl-terminal hydrolase 12 (Arabidopsis thaliana OX%3D3702)	0	0	0	17	0	0	0	0	0	0	0	11	0	0	0	0	0	0	0	0	0	0	0	6
SMEL3Ch05	8086023	8091884	SMEL_005g229770.1	Similar to UBP12: Ubiquitin carboxyl-terminal hydrolase 12 (Arabidopsis thaliana OX%3D3702)	0	0	0	6	0	0	0	0	0	0	0	6	0	0	0	0	0	0	0	0	0	0	0	0
SMEL3Ch05	8146307	8154174	SMEL_005g229790.1	Similar to NUP1: Nuclear pore complex protein NUP1 (Arabidopsis thaliana OX%3D3702)	0	0	0	50	0	0	0	0	0	0	0	0	0	0	0	0	0	0	0	0	0	0	0	50
SMEL3Ch05	8163394	8167623	SMEL_005g229820.1	Similar to DNAJ1: DnaJ protein homolog (Cucumis sativus OX%3D3659)	0	0	0	72	0	0	0	0	0	0	0	0	0	0	0	0	0	0	0	0	0	0	0	72
SMEL3Ch05	8209971	8214162	SMEL_005g229830.1	Similar to VPS60-1: Vacuolar protein sorting-associated protein 60.1 (Arabidopsis thaliana OX%3D3702)	0	0	0	1	0	0	0	0	0	0	0	1	0	0	0	0	0	0	0	0	0	0	0	0
SMEL3Ch05	8235877	8241618	SMEL_005g229840.1	Similar to NDC1: Alternative NAD(P)H-ubiquinone oxidoreductase C1%2C chloroplastic/mitochondrial (Arabidopsis thaliana OX%3D3702)	0	0	0	1	0	0	0	0	0	0	0	1	0	0	0	0	0	0	0	0	0	0	0	0
SMEL3Ch05	8251208	8252551	SMEL_005g229850.1	Protein of unknown function	0	0	0	1	0	0	0	0	0	0	0	1	0	0	0	0	0	0	0	0	0	0	0	0
SMEL3Ch05	8253742	8262101	SMEL_005g229860.1	Similar to GSO1: LRR receptor-like serine/threonine-protein kinase GSO1 (Arabidopsis thaliana OX%3D3702)	0	0	0	1	0	0	0	0	0	0	0	1	0	0	0	0	0	0	0	0	0	0	0	0
SMEL3Ch05	8339337	8340071	SMEL_005g229950.1	Similar to FD3: Ferredoxin-3%2C chloroplastic (Arabidopsis thaliana OX%3D3702)	0	0	0	8	0	0	0	0	0	0	0	0	0	0	0	0	0	0	0	0	0	0	0	8
SMEL3Ch05	8352576	8353868	SMEL_005g229960.1	Similar to ASAT3: Acylsugar acyltransferase 3 (Solanum lycopersicum OX%3D4081)	0	0	0	2	0	0	0	0	0	0	0	0	0	0	0	0	0	0	0	0	0	0	0	2
SMEL3Ch05	8826781	8827530	SMEL_005g229970.1	Protein of unknown function	0	0	0	39	0	0	0	0	0	0	0	39	0	0	0	0	0	0	0	0	0	0	0	0
SMEL3Ch05	8829893	8832421	SMEL_005g229980.1	Similar to ATX1: Copper transport protein ATX1 (Arabidopsis thaliana OX%3D3702)	0	0	0	1	0	0	0	0	0	0	0	0	0	0	0	0	0	0	0	0	0	0	0	1
SMEL3Ch05	8838879	8847640	SMEL_005g230000.1	Similar to PDR2: Pleiotropic drug resistance protein 2 (Nicotiana plumbaginifolia OX%3D4092)	0	0	0	13	0	0	0	0	0	0	0	13	0	0	0	0	0	0	0	0	0	0	0	0
SMEL3Ch05	8854657	8862685	SMEL_005g230010.1	Similar to PDR2: Pleiotropic drug resistance protein 2 (Nicotiana plumbaginifolia OX%3D4092)	0	0	0	12	0	0	0	0	0	0	0	12	0	0	0	0	0	0	0	0	0	0	0	0
SMEL3Ch05	8890043	8892879	SMEL_005g230050.1	Similar to TRZ2: tRNase Z TRZ2%2C chloroplastic (Arabidopsis thaliana OX%3D3702)	0	0	0	3	0	0	0	0	0	0	0	0	0	0	0	0	0	0	0	0	0	0	0	3
SMEL3Ch05	8894196	8899343	SMEL_005g230060.1	Protein of unknown function	0	0	0	3	0	0	0	0	0	0	0	0	0	3	0	0	0	0	0	0	0	0	0	0
SMEL3Ch05	8899670	8900476	SMEL_005g230070.1	Protein of unknown function	0	0	0	3	0	0	0	0	0	0	0	3	0	0	0	0	0	0	0	0	0	0	0	0
SMEL3Ch05	7903799	7906646	SMEL_005g229650.1	Similar to MYB14: Transcription factor MYB14 (Arabidopsis thaliana OX%3D3702)
SMEL3Ch05	7912497	7921021	SMEL_005g229660.1	Similar to IPUT1: Inositol phosphorylceramide glucuronosyltransferase 1 (Arabidopsis thaliana OX%3D3702)
SMEL3Ch05	7923584	7925015	SMEL_005g229670.1	Similar to PPCK2: Phosphoenolpyruvate carboxylase kinase 2 (Arabidopsis thaliana OX%3D3702)
SMEL3Ch05	8155749	8156288	SMEL_005g229800.1	Similar to ATL70: RING-H2 finger protein ATL70 (Arabidopsis thaliana OX%3D3702)
SMEL3Ch05	8159140	8161562	SMEL_005g229810.1	Similar to PIMP1: CASP-like protein PIMP1 (Capsicum annuum OX%3D4072)
SMEL3Ch05	8264553	8268460	SMEL_005g229870.1	Similar to SMXL3: Protein SMAX1-LIKE 3 (Arabidopsis thaliana OX%3D3702)
SMEL3Ch05	8278542	8279855	SMEL_005g229880.1	Similar to ERF1-3: Eukaryotic peptide chain release factor subunit 1-3 (Arabidopsis thaliana OX%3D3702)
SMEL3Ch05	8285770	8286489	SMEL_005g229890.1	Similar to OFP13: Transcription repressor OFP13 (Arabidopsis thaliana OX%3D3702)
SMEL3Ch05	8303560	8303994	SMEL_005g229900.1	Similar to RPS17: 40S ribosomal protein S17 (Solanum lycopersicum OX%3D4081)
SMEL3Ch05	8307766	8309486	SMEL_005g229910.1	Similar to DIVARICATA: Transcription factor DIVARICATA (Antirrhinum majus OX%3D4151)
SMEL3Ch05	8316156	8316281	SMEL_005g229920.1	Protein of unknown function
SMEL3Ch05	8317054	8319546	SMEL_005g229930.1	Similar to At2g27730: Uncharacterized protein At2g27730%2C mitochondrial (Arabidopsis thaliana OX%3D3702)
SMEL3Ch05	8320423	8332204	SMEL_005g229940.1	Similar to At2g23930: Probable small nuclear ribonucleoprotein G (Arabidopsis thaliana OX%3D3702)
SMEL3Ch05	8833234	8834723	SMEL_005g229990.1	Similar to PER2: Peroxidase 2 (Zea mays OX%3D4577)
SMEL3Ch05	8872277	8873534	SMEL_005g230020.1	Protein of unknown function
SMEL3Ch05	8879399	8882128	SMEL_005g230030.1	Protein of unknown function
SMEL3Ch05	8887645	8888979	SMEL_005g230040.1	Similar to UGT94E5: Beta-D-glucosyl crocetin beta-1%2C6-glucosyltransferase (Gardenia jasminoides OX%3D114476)

## Sheet: P-COPTR 5.1
Ch	Start	END	Gene	Annotation	HIGH	MODERATE	LOW	MODIFIER	3_prime_UTR_variant	5_prime_UTR_premature_start_codon_gain_variant	5_prime_UTR_variant	conservative_inframe_deletion	conservative_inframe_insertion	disruptive_inframe_deletion	disruptive_inframe_insertion	downstream_gene_variant	frameshift_variant	intron_variant	missense_variant	non_coding_transcript_variant	splice_donor_variant	splice_region_variant	start_lost	stop_gained	stop_lost	stop_retained_variant	synonymous_variant	upstream_gene_variant
SMEL3Ch05	34545969	34548532	SMEL_005g235160.1	Similar to At4g09670: Uncharacterized oxidoreductase At4g09670 (Arabidopsis thaliana OX%3D3702)	0	2	1	1	0	0	0	0	0	0	0	0	0	1	2	0	0	0	0	0	0	0	1	0
SMEL3Ch05	34661047	34664156	SMEL_005g235240.1	Similar to WRKY51: Probable WRKY transcription factor 51 (Arabidopsis thaliana OX%3D3702)	0	2	0	11	0	0	0	0	0	0	0	0	0	10	2	0	0	0	0	0	0	0	0	1
SMEL3Ch05	34358679	34359519	SMEL_005g235090.1	Similar to KTI2: Kunitz trypsin inhibitor 2 (Arabidopsis thaliana OX%3D3702)	0	1	0	9	0	0	0	0	0	0	0	1	0	0	1	0	0	0	0	0	0	0	0	8
SMEL3Ch05	34260541	34262513	SMEL_005g235040.1	Similar to MUB3: Membrane-anchored ubiquitin-fold protein 3 (Oryza sativa subsp. japonica OX%3D39947)	0	0	0	1	0	0	0	0	0	0	0	1	0	0	0	0	0	0	0	0	0	0	0	0
SMEL3Ch05	34283079	34283913	SMEL_005g235050.1	Similar to KTI2: Kunitz trypsin inhibitor 2 (Arabidopsis thaliana OX%3D3702)	0	0	0	3	0	0	0	0	0	0	0	2	0	0	0	0	0	0	0	0	0	0	0	1
SMEL3Ch05	34295395	34296028	SMEL_005g235060.1	Similar to KTI2: Kunitz trypsin inhibitor 2 (Arabidopsis thaliana OX%3D3702)	0	0	0	9	0	0	0	0	0	0	0	9	0	0	0	0	0	0	0	0	0	0	0	0
SMEL3Ch05	34301142	34301447	SMEL_005g235070.1	Similar to PIP20-2: Kunitz-type trypsin inhibitor-like 2 protein (Pisum sativum OX%3D3888)	0	0	0	3	0	0	0	0	0	0	0	0	0	0	0	0	0	0	0	0	0	0	0	3
SMEL3Ch05	34352976	34354406	SMEL_005g235080.1	Similar to ATL15: E3 ubiquitin-protein ligase ATL15 (Arabidopsis thaliana OX%3D3702)	0	0	0	18	0	0	0	0	0	0	0	16	0	0	0	0	0	0	0	0	0	0	0	2
SMEL3Ch05	34498429	34503826	SMEL_005g235120.1	Similar to PPCS2: Phosphopantothenate--cysteine ligase 2 (Arabidopsis thaliana OX%3D3702)	0	0	0	1	0	0	0	0	0	0	0	0	0	0	0	0	0	0	0	0	0	0	0	1
SMEL3Ch05	34509952	34510698	SMEL_005g235130.1	Similar to ATPD: ATP synthase delta chain%2C chloroplastic (Nicotiana tabacum OX%3D4097)	0	0	0	2	0	0	0	0	0	0	0	1	0	0	0	0	0	0	0	0	0	0	0	1
SMEL3Ch05	34532679	34534594	SMEL_005g235150.1	Similar to CYP78A7: Cytochrome P450 78A7 (Arabidopsis thaliana OX%3D3702)	0	0	0	1	0	0	0	0	0	0	0	0	0	0	0	0	0	0	0	0	0	0	0	1
SMEL3Ch05	34553263	34556320	SMEL_005g235170.1	Similar to TT10: Laccase-15 (Arabidopsis thaliana OX%3D3702)	0	0	0	3	0	0	0	0	0	0	0	3	0	0	0	0	0	0	0	0	0	0	0	0
SMEL3Ch05	34568938	34575263	SMEL_005g235180.1	Similar to At4g09670: Uncharacterized oxidoreductase At4g09670 (Arabidopsis thaliana OX%3D3702)	0	0	0	2	0	0	0	0	0	0	0	2	0	0	0	0	0	0	0	0	0	0	0	0
SMEL3Ch05	34632590	34634198	SMEL_005g235220.1	Protein of unknown function	0	0	0	2	0	0	0	0	0	0	0	2	0	0	0	0	0	0	0	0	0	0	0	0
SMEL3Ch05	34651220	34656222	SMEL_005g235230.1	Similar to WRKY51: Probable WRKY transcription factor 51 (Arabidopsis thaliana OX%3D3702)	0	0	0	3	0	0	0	0	0	0	0	0	0	0	0	0	0	0	0	0	0	0	0	3
SMEL3Ch05	34732422	34736798	SMEL_005g235250.1	Similar to WRKY51: Probable WRKY transcription factor 51 (Arabidopsis thaliana OX%3D3702)	0	0	0	1	0	0	0	0	0	0	0	0	0	0	0	0	0	0	0	0	0	0	0	1
SMEL3Ch05	34774061	34775043	SMEL_005g235280.1	Similar to Secoisolariciresinol dehydrogenase (Fragment) (Forsythia intermedia OX%3D55183)	0	0	0	31	0	0	0	0	0	0	0	31	0	0	0	0	0	0	0	0	0	0	0	0
SMEL3Ch05	34821430	34822384	SMEL_005g235310.1	Similar to Secoisolariciresinol dehydrogenase (Fragment) (Forsythia intermedia OX%3D55183)	0	0	0	1	0	0	0	0	0	0	0	1	0	0	0	0	0	0	0	0	0	0	0	0
SMEL3Ch05	34832727	34833798	SMEL_005g235320.1	Similar to Secoisolariciresinol dehydrogenase (Fragment) (Forsythia intermedia OX%3D55183)	0	0	0	4	0	0	0	0	0	0	0	4	0	0	0	0	0	0	0	0	0	0	0	0
SMEL3Ch05	34844196	34845332	SMEL_005g235330.1	Similar to Secoisolariciresinol dehydrogenase (Fragment) (Forsythia intermedia OX%3D55183)	0	0	0	30	0	0	0	0	0	0	0	18	0	0	0	0	0	0	0	0	0	0	0	12
SMEL3Ch05	34866916	34879001	SMEL_005g235340.1	Similar to SAMC2: Probable S-adenosylmethionine carrier 2%2C chloroplastic (Arabidopsis thaliana OX%3D3702)	0	0	0	3	0	0	0	0	0	0	0	3	0	0	0	0	0	0	0	0	0	0	0	0
SMEL3Ch05	34886968	34891614	SMEL_005g235350.1	Similar to TAR4: Tryptophan aminotransferase-related protein 4 (Arabidopsis thaliana OX%3D3702)	0	0	0	3	0	0	0	0	0	0	0	3	0	0	0	0	0	0	0	0	0	0	0	0
SMEL3Ch05	34926446	34942843	SMEL_005g235360.1	Similar to GI: Protein GIGANTEA (Arabidopsis thaliana OX%3D3702)	0	0	0	1	0	0	0	0	0	0	0	0	0	0	0	0	0	0	0	0	0	0	0	1
SMEL3Ch05	34944458	34951512	SMEL_005g235370.1	Similar to URGT5: UDP-rhamnose/UDP-galactose transporter 5 (Arabidopsis thaliana OX%3D3702)	0	0	0	1	0	0	0	0	0	0	0	0	0	0	0	0	0	0	0	0	0	0	0	1
SMEL3Ch05	35006718	35012317	SMEL_005g235380.1	Protein of unknown function	0	0	0	25	0	0	0	0	0	0	0	0	0	0	0	0	0	0	0	0	0	0	0	25
SMEL3Ch05	35026603	35027931	SMEL_005g235400.1	Similar to OHP2: Light-harvesting complex-like protein OHP2%2C chloroplastic (Arabidopsis thaliana OX%3D3702)	0	0	0	1	0	0	0	0	0	0	0	1	0	0	0	0	0	0	0	0	0	0	0	0
SMEL3Ch05	35066828	35068913	SMEL_005g235420.1	Similar to Secoisolariciresinol dehydrogenase (Fragment) (Forsythia intermedia OX%3D55183)	0	0	0	10	0	0	0	0	0	0	0	7	0	0	0	0	0	0	0	0	0	0	0	3
SMEL3Ch05	35090352	35090795	SMEL_005g235440.1	Protein of unknown function	0	0	0	1	0	0	0	0	0	0	0	1	0	0	0	0	0	0	0	0	0	0	0	0
SMEL3Ch05	35130357	35130794	SMEL_005g235460.1	Similar to NDPS1: Dimethylallylcistransferase%2C chloroplastic (Solanum lycopersicum OX%3D4081)	0	0	0	5	0	0	0	0	0	0	0	5	0	0	0	0	0	0	0	0	0	0	0	0
SMEL3Ch05	35459933	35464623	SMEL_005g235470.1	Similar to MUB6: Membrane-anchored ubiquitin-fold protein 6 (Arabidopsis thaliana OX%3D3702)	0	0	0	2	0	0	0	0	0	0	0	2	0	0	0	0	0	0	0	0	0	0	0	0
SMEL3Ch05	34239259	34240089	SMEL_005g235030.1	Similar to KTI2: Kunitz trypsin inhibitor 2 (Arabidopsis thaliana OX%3D3702)
SMEL3Ch05	34486066	34490377	SMEL_005g235100.1	Similar to TGA7: Transcription factor TGA7 (Arabidopsis thaliana OX%3D3702)
SMEL3Ch05	34492590	34497759	SMEL_005g235110.1	Similar to DJA7A: Chaperone protein dnaJ A7A%2C chloroplastic (Oryza sativa subsp. japonica OX%3D39947)
SMEL3Ch05	34519951	34522952	SMEL_005g235140.1	Similar to TT10: Laccase-15 (Arabidopsis thaliana OX%3D3702)
SMEL3Ch05	34581704	34585309	SMEL_005g235190.1	Similar to NAC017: NAC domain-containing protein 17 (Arabidopsis thaliana OX%3D3702)
SMEL3Ch05	34616136	34617240	SMEL_005g235200.1	Similar to P23-1: Co-chaperone protein p23-1 (Brassica napus OX%3D3708)
SMEL3Ch05	34619028	34630452	SMEL_005g235210.1	Similar to At1g71790: Probable F-actin-capping protein subunit beta (Arabidopsis thaliana OX%3D3702)
SMEL3Ch05	34744676	34751116	SMEL_005g235260.1	Similar to Os01g0184500: DEAD-box ATP-dependent RNA helicase 39 (Oryza sativa subsp. japonica OX%3D39947)
SMEL3Ch05	34751594	34754999	SMEL_005g235270.1	Similar to At1g34110: Probable LRR receptor-like serine/threonine-protein kinase At1g34110 (Arabidopsis thaliana OX%3D3702)
SMEL3Ch05	34801720	34803603	SMEL_005g235290.1	Similar to Secoisolariciresinol dehydrogenase (Fragment) (Podophyllum peltatum OX%3D35933)
SMEL3Ch05	34816257	34818041	SMEL_005g235300.1	Similar to CXE20: Probable carboxylesterase 120 (Arabidopsis thaliana OX%3D3702)
SMEL3Ch05	35017060	35021761	SMEL_005g235390.1	Protein of unknown function
SMEL3Ch05	35053147	35053846	SMEL_005g235410.1	Similar to Secoisolariciresinol dehydrogenase (Fragment) (Forsythia intermedia OX%3D55183)
SMEL3Ch05	35083682	35084767	SMEL_005g235430.1	Similar to Secoisolariciresinol dehydrogenase (Fragment) (Forsythia intermedia OX%3D55183)
SMEL3Ch05	35111695	35114066	SMEL_005g235450.1	Similar to ERF112: Ethylene-responsive transcription factor ERF112 (Arabidopsis thaliana OX%3D3702)

## Sheet: P-FLAVO-POLY 5
Ch	Start	END	Gene	Annotation	HIGH	MODERATE	LOW	MODIFIER	3_prime_UTR_variant	5_prime_UTR_premature_start_codon_gain_variant	5_prime_UTR_variant	conservative_inframe_deletion	conservative_inframe_insertion	disruptive_inframe_deletion	disruptive_inframe_insertion	downstream_gene_variant	frameshift_variant	intron_variant	missense_variant	non_coding_transcript_variant	splice_donor_variant	splice_region_variant	start_lost	stop_gained	stop_lost	stop_retained_variant	synonymous_variant	upstream_gene_variant
SMEL3Ch05	35780681	35783396	SMEL_005g235690.1	Similar to UGT85A24: 7-deoxyloganetin glucosyltransferase (Gardenia jasminoides OX%3D114476)	2	5	1	65	5	0	0	0	0	0	0	28	1	10	5	0	0	0	0	1	0	0	1	22
SMEL3Ch05	35899261	35908676	SMEL_005g235810.1	Similar to AGL70: Agamous-like MADS-box protein AGL70 (Arabidopsis thaliana OX%3D3702)	1	3	0	106	2	0	1	0	0	0	0	33	0	31	3	0	0	0	0	1	0	0	0	39
SMEL3Ch05	35956233	35956549	SMEL_005g235830.1	Protein of unknown function	1	1	0	71	0	0	0	0	0	0	0	61	1	1	1	0	0	0	0	0	0	0	0	9
SMEL3Ch05	36803433	36806120	SMEL_005g236240.1	Similar to BEAT: Acetyl-CoA-benzylalcohol acetyltransferase (Clarkia breweri OX%3D36903)	1	0	0	2	0	0	0	0	0	0	0	2	1	0	0	0	0	0	0	0	0	0	0	0
SMEL3Ch05	36381902	36384416	SMEL_005g236050.1	Similar to ATP synthase protein MI25 (Nicotiana tabacum OX%3D4097)	0	6	0	25	0	0	0	0	0	0	0	5	0	1	6	0	0	0	0	0	0	0	0	19
SMEL3Ch05	35858992	35859444	SMEL_005g235750.1	Protein of unknown function	0	3	0	111	0	0	0	0	0	0	0	73	0	0	3	0	0	0	0	0	0	0	0	38
SMEL3Ch05	35864793	35870546	SMEL_005g235760.1	Protein of unknown function	0	3	1	78	0	0	0	0	0	0	0	31	0	8	3	0	0	0	0	0	0	0	1	39
SMEL3Ch05	35663025	35663948	SMEL_005g235570.1	Similar to RAP2-4: Ethylene-responsive transcription factor RAP2-4 (Arabidopsis thaliana OX%3D3702)	0	2	0	53	0	0	0	0	0	0	2	29	0	0	0	0	0	0	0	0	0	0	0	24
SMEL3Ch05	36720881	36728849	SMEL_005g236180.1	Similar to OPT4: Oligopeptide transporter 4 (Arabidopsis thaliana OX%3D3702)	0	2	0	10	0	0	0	0	0	0	0	5	0	3	2	0	0	0	0	0	0	0	0	2
SMEL3Ch05	35630562	35642717	SMEL_005g235560.1	Protein of unknown function	0	1	0	21	0	0	0	0	0	0	0	8	0	0	1	0	0	0	0	0	0	0	0	13
SMEL3Ch05	35668891	35669994	SMEL_005g235590.1	Protein of unknown function	0	1	0	30	0	0	0	0	0	0	0	1	0	0	1	0	0	0	0	0	0	0	0	29
SMEL3Ch05	35770321	35772234	SMEL_005g235680.1	Similar to UGT85A24: 7-deoxyloganetin glucosyltransferase (Gardenia jasminoides OX%3D114476)	0	1	1	35	0	0	0	0	0	0	0	32	0	0	1	0	0	0	0	0	0	0	1	3
SMEL3Ch05	35788841	35791142	SMEL_005g235700.1	Similar to PUP3: Purine permease 3 (Arabidopsis thaliana OX%3D3702)	0	1	2	54	1	0	0	0	0	0	0	25	0	5	1	0	0	0	0	0	0	0	2	23
SMEL3Ch05	35843207	35847294	SMEL_005g235740.1	Similar to OFUT7: O-fucosyltransferase 7 (Arabidopsis thaliana OX%3D3702)	0	1	3	72	4	0	1	0	0	0	0	16	0	15	1	0	0	0	0	0	0	0	3	36
SMEL3Ch05	35888054	35888437	SMEL_005g235780.1	Protein of unknown function	0	1	0	94	0	0	0	0	0	0	0	47	0	0	1	0	0	0	0	0	0	0	0	47
SMEL3Ch05	35928861	35929695	SMEL_005g235820.1	Similar to MADS21: MADS-box transcription factor 21 (Oryza sativa subsp. japonica OX%3D39947)	0	1	0	86	0	0	0	0	0	0	0	28	0	1	1	0	0	0	0	0	0	0	0	57
SMEL3Ch05	36273329	36276119	SMEL_005g235980.1	Similar to AED3: Aspartyl protease AED3 (Arabidopsis thaliana OX%3D3702)	0	1	0	14	0	0	0	0	0	0	0	0	0	0	1	0	0	0	0	0	0	0	0	14
SMEL3Ch05	36333619	36337704	SMEL_005g236030.1	Similar to CER2: Protein ECERIFERUM 2 (Arabidopsis thaliana OX%3D3702)	0	1	1	14	0	0	1	0	0	0	0	1	0	1	1	0	0	0	0	0	0	0	1	11
SMEL3Ch05	36713654	36718230	SMEL_005g236160.1	Protein of unknown function	0	1	1	5	0	0	0	0	0	0	0	0	0	1	1	0	0	0	0	0	0	0	1	4
SMEL3Ch05	36729149	36745135	SMEL_005g236190.1	Similar to OPT4: Oligopeptide transporter 4 (Arabidopsis thaliana OX%3D3702)	0	1	0	14	0	0	0	0	0	0	0	1	0	11	1	0	0	0	0	0	0	0	0	2
SMEL3Ch05	36790309	36791894	SMEL_005g236220.1	Similar to At5g65660: Uncharacterized protein At5g65660 (Arabidopsis thaliana OX%3D3702)	0	1	1	67	1	0	0	0	0	1	0	35	0	12	0	0	0	1	0	0	0	0	0	20
SMEL3Ch05	35603205	35607455	SMEL_005g235540.1	Protein of unknown function	0	0	0	4	0	0	0	0	0	0	0	0	0	0	0	0	0	0	0	0	0	0	0	4
SMEL3Ch05	35610590	35610802	SMEL_005g235550.1	Protein of unknown function	0	0	0	20	0	0	0	0	0	0	0	1	0	0	0	0	0	0	0	0	0	0	0	19
SMEL3Ch05	35665683	35666099	SMEL_005g235580.1	Protein of unknown function	0	0	0	47	0	0	0	0	0	0	0	16	0	0	0	0	0	0	0	0	0	0	0	31
SMEL3Ch05	35674775	35676086	SMEL_005g235600.1	Protein of unknown function	0	0	0	1	0	0	0	0	0	0	0	0	0	0	0	0	0	0	0	0	0	0	0	1
SMEL3Ch05	35701756	35702679	SMEL_005g235610.1	Protein of unknown function	0	0	0	2	0	0	0	0	0	0	0	2	0	0	0	0	0	0	0	0	0	0	0	0
SMEL3Ch05	35715261	35719232	SMEL_005g235620.1	Protein of unknown function	0	0	0	3	0	0	0	0	0	0	0	2	0	0	0	0	0	0	0	0	0	0	0	1
SMEL3Ch05	35721295	35723573	SMEL_005g235630.1	Similar to At4g34215: Probable carbohydrate esterase At4g34215 (Arabidopsis thaliana OX%3D3702)	0	0	0	2	0	0	0	0	0	0	0	0	0	1	0	0	0	0	0	0	0	0	0	1
SMEL3Ch05	35724043	35726292	SMEL_005g235640.1	Similar to DTM1: Signal peptidase complex-like protein DTM1 (Oryza sativa subsp. japonica OX%3D39947)	0	0	0	2	0	0	0	0	0	0	0	2	0	0	0	0	0	0	0	0	0	0	0	0
SMEL3Ch05	35757838	35759808	SMEL_005g235670.1	Similar to UGT85A24: 7-deoxyloganetin glucosyltransferase (Gardenia jasminoides OX%3D114476)	0	0	0	49	0	0	0	0	0	0	0	0	0	0	0	0	0	0	0	0	0	0	0	49
SMEL3Ch05	35792531	35796227	SMEL_005g235710.1	Similar to SAPK1: Serine/threonine-protein kinase SAPK1 (Oryza sativa subsp. japonica OX%3D39947)	0	0	1	65	1	0	0	0	0	0	0	19	0	14	0	0	0	0	0	0	0	0	1	31
SMEL3Ch05	35825090	35827910	SMEL_005g235720.1	Similar to TFT2: 14-3-3 protein 2 (Solanum lycopersicum OX%3D4081)	0	0	2	180	3	0	1	0	0	0	0	121	0	6	0	0	0	0	0	0	0	0	2	49
SMEL3Ch05	35832700	35837364	SMEL_005g235730.1	Similar to COX6B-1: Cytochrome c oxidase subunit 6b-1 (Arabidopsis thaliana OX%3D3702)	0	0	2	163	1	0	3	0	0	0	0	19	0	21	0	0	0	0	0	0	0	0	2	119
SMEL3Ch05	35871752	35872105	SMEL_005g235770.1	Protein of unknown function	0	0	0	62	0	0	0	0	0	0	0	14	0	0	0	0	0	0	0	0	0	0	0	48
SMEL3Ch05	35890668	35891054	SMEL_005g235790.1	Protein of unknown function	0	0	0	96	0	0	0	0	0	0	0	55	0	0	0	0	0	0	0	0	0	0	0	41
SMEL3Ch05	35894720	35895130	SMEL_005g235800.1	Protein of unknown function	0	0	1	100	0	0	0	0	0	0	0	39	0	0	0	0	0	0	0	0	0	0	1	61
SMEL3Ch05	35963393	35963712	SMEL_005g235840.1	Protein of unknown function	0	0	0	20	0	0	0	0	0	0	0	20	0	0	0	0	0	0	0	0	0	0	0	0
SMEL3Ch05	36006433	36016820	SMEL_005g235860.1	Similar to AGL70: Agamous-like MADS-box protein AGL70 (Arabidopsis thaliana OX%3D3702)	0	0	0	4	0	0	0	0	0	0	0	1	0	0	0	0	0	0	0	0	0	0	0	3
SMEL3Ch05	36026814	36035715	SMEL_005g235870.1	Similar to AGL70: Agamous-like MADS-box protein AGL70 (Arabidopsis thaliana OX%3D3702)	0	0	0	14	0	0	0	0	0	0	0	1	0	0	0	0	0	0	0	0	0	0	0	13
SMEL3Ch05	36050780	36051877	SMEL_005g235880.1	Similar to ATL54: RING-H2 finger protein ATL54 (Arabidopsis thaliana OX%3D3702)	0	0	0	35	0	0	0	0	0	0	0	27	0	0	0	0	0	0	0	0	0	0	0	8
SMEL3Ch05	36085842	36086963	SMEL_005g235890.1	Similar to ATL6: E3 ubiquitin-protein ligase ATL6 (Arabidopsis thaliana OX%3D3702)	0	0	0	36	0	0	0	0	0	0	0	8	0	0	0	0	0	0	0	0	0	0	0	28
SMEL3Ch05	36091735	36094452	SMEL_005g235900.1	Similar to PUP3: Purine permease 3 (Arabidopsis thaliana OX%3D3702)	0	0	0	11	0	0	0	0	0	0	0	3	0	0	0	0	0	0	0	0	0	0	0	8
SMEL3Ch05	36102827	36104747	SMEL_005g235910.1	Similar to PUP3: Purine permease 3 (Arabidopsis thaliana OX%3D3702)	0	0	0	10	1	0	0	0	0	0	0	5	0	1	0	0	0	0	0	0	0	0	0	3
SMEL3Ch05	36148444	36150304	SMEL_005g235920.1	Similar to PUP3: Purine permease 3 (Arabidopsis thaliana OX%3D3702)	0	0	0	2	0	0	0	0	0	0	0	2	0	0	0	0	0	0	0	0	0	0	0	0
SMEL3Ch05	36167556	36168032	SMEL_005g235930.1	Similar to 17.3 kDa class II heat shock protein (Solanum peruvianum OX%3D4082)	0	0	0	2	0	0	0	0	0	0	0	1	0	0	0	0	0	0	0	0	0	0	0	1
SMEL3Ch05	36171466	36174428	SMEL_005g235940.1	Protein of unknown function	0	0	0	1	0	0	0	0	0	0	0	1	0	0	0	0	0	0	0	0	0	0	0	0
SMEL3Ch05	36217059	36220138	SMEL_005g235950.1	Similar to CYCD2-2: Cyclin-D2-2 (Oryza sativa subsp. japonica OX%3D39947)	0	0	0	2	0	0	0	0	0	0	0	0	0	2	0	0	0	0	0	0	0	0	0	0
SMEL3Ch05	36233438	36239610	SMEL_005g235960.1	Similar to CRK10: Cysteine-rich receptor-like protein kinase 10 (Arabidopsis thaliana OX%3D3702)	0	0	0	12	0	0	0	0	0	0	0	1	0	2	0	0	0	0	0	0	0	0	0	9
SMEL3Ch05	36271007	36272362	SMEL_005g235970.1	Protein of unknown function	0	0	0	20	0	0	0	0	0	0	0	15	0	0	0	0	0	0	0	0	0	0	0	5
SMEL3Ch05	36289817	36290638	SMEL_005g235990.1	Similar to AHL17: AT-hook motif nuclear-localized protein 17 (Arabidopsis thaliana OX%3D3702)	0	0	2	37	0	0	0	0	0	0	0	15	0	0	0	0	0	0	0	0	0	0	2	22
SMEL3Ch05	36301268	36306190	SMEL_005g236000.1	Similar to 3-isopropylmalate dehydrogenase%2C chloroplastic (Solanum tuberosum OX%3D4113)	0	0	0	45	0	0	0	0	0	0	0	15	0	4	0	0	0	0	0	0	0	0	0	26
SMEL3Ch05	36320860	36331249	SMEL_005g236020.1	Protein of unknown function	0	0	0	4	0	0	0	0	0	0	0	0	0	2	0	0	0	0	0	0	0	0	0	2
SMEL3Ch05	36366481	36372531	SMEL_005g236040.1	Similar to SIC: Protein SICKLE (Arabidopsis thaliana OX%3D3702)	0	0	0	25	1	0	0	0	0	0	0	9	0	8	0	0	0	0	0	0	0	0	0	7
SMEL3Ch05	36390418	36397411	SMEL_005g236060.1	Similar to At5g53970: Probable aminotransferase TAT2 (Arabidopsis thaliana OX%3D3702)	0	0	0	28	0	0	0	0	0	0	0	17	0	8	0	0	0	0	0	0	0	0	0	3
SMEL3Ch05	36401067	36423587	SMEL_005g236070.1	Similar to SAB: Protein SABRE (Arabidopsis thaliana OX%3D3702)	0	0	0	19	0	0	0	0	0	0	0	17	0	2	0	0	0	0	0	0	0	0	0	0
SMEL3Ch05	36438250	36439728	SMEL_005g236080.1	Similar to FLCY: Farnesylcysteine lyase (Arabidopsis thaliana OX%3D3702)	0	0	0	2	0	0	0	0	0	0	0	1	0	0	0	0	0	0	0	0	0	0	0	1
SMEL3Ch05	36440155	36448082	SMEL_005g236090.1	Similar to TFIIA-S: Transcription initiation factor IIA subunit 2 (Arabidopsis thaliana OX%3D3702)	0	0	0	4	0	0	0	0	0	0	0	0	0	1	0	0	0	0	0	0	0	0	0	3
SMEL3Ch05	36450986	36454719	SMEL_005g236100.1	Similar to WAKL20: Wall-associated receptor kinase-like 20 (Arabidopsis thaliana OX%3D3702)	0	0	0	5	0	0	0	0	0	0	0	2	0	1	0	0	0	0	0	0	0	0	0	2
SMEL3Ch05	36455458	36461425	SMEL_005g236110.1	Protein of unknown function	0	0	0	4	0	0	0	0	0	0	0	1	0	2	0	0	0	0	0	0	0	0	0	1
SMEL3Ch05	36464037	36470623	SMEL_005g236120.1	Protein of unknown function	0	0	0	5	0	0	0	0	0	0	0	2	0	2	0	0	0	0	0	0	0	0	0	1
SMEL3Ch05	36471461	36475752	SMEL_005g236130.1	Protein of unknown function	0	0	0	7	0	0	0	0	0	0	0	3	0	0	0	0	0	0	0	0	0	0	0	4
SMEL3Ch05	36482804	36483979	SMEL_005g236140.1	Similar to ANR1: MADS-box transcription factor ANR1 (Arabidopsis thaliana OX%3D3702)	0	0	0	6	0	0	0	0	0	0	0	2	0	0	0	0	0	0	0	0	0	0	0	4
SMEL3Ch05	36712124	36712778	SMEL_005g236150.1	Similar to MADS27: MADS-box transcription factor 27 (Oryza sativa subsp. japonica OX%3D39947)	0	0	0	1	0	0	0	0	0	0	0	1	0	0	0	0	0	0	0	0	0	0	0	0
SMEL3Ch05	36719217	36719690	SMEL_005g236170.1	Protein of unknown function	0	0	0	9	0	0	0	0	0	0	0	3	0	0	0	0	0	0	0	0	0	0	0	6
SMEL3Ch05	36749801	36750277	SMEL_005g236200.1	Similar to OPT2: Oligopeptide transporter 2 (Arabidopsis thaliana OX%3D3702)	0	0	0	2	0	0	0	0	0	0	0	2	0	0	0	0	0	0	0	0	0	0	0	0
SMEL3Ch05	36754820	36757045	SMEL_005g236210.1	Similar to BHLH93: Transcription factor bHLH93 (Arabidopsis thaliana OX%3D3702)	0	0	0	19	0	0	0	0	0	0	0	0	0	1	0	0	0	0	0	0	0	0	0	18
SMEL3Ch05	36797710	36802592	SMEL_005g236230.1	Similar to PCKA: Phosphoenolpyruvate carboxykinase (ATP) (Arabidopsis thaliana OX%3D3702)	0	0	0	35	0	0	0	0	0	0	0	3	0	4	0	0	0	0	0	0	0	0	0	28
SMEL3Ch05	36813474	36820294	SMEL_005g236250.1	Similar to TUBA3: Tubulin alpha-3 chain (Hordeum vulgare OX%3D4513)	0	0	0	2	0	0	0	0	0	0	0	0	0	0	0	0	0	0	0	0	0	0	0	2
SMEL3Ch05	36840135	36847430	SMEL_005g236260.1	Similar to AAP6: Amino acid permease 6 (Arabidopsis thaliana OX%3D3702)	0	0	2	35	1	0	0	0	0	0	0	0	0	32	0	0	0	0	0	0	0	0	2	2
SMEL3Ch05	35731519	35734932	SMEL_005g235650.1	Similar to CRY1: Cryptochrome-1 (Arabidopsis thaliana OX%3D3702)
SMEL3Ch05	35735062	35736949	SMEL_005g235660.1	Similar to Nodulin-26 (Glycine max OX%3D3847)
SMEL3Ch05	35985090	35986927	SMEL_005g235850.1	Similar to MADS18: MADS-box transcription factor 18 (Oryza sativa subsp. indica OX%3D39946)
SMEL3Ch05	36316133	36319606	SMEL_005g236010.1	Protein of unknown function

## Sheet: P-PPROT 5.1
Ch	Start	END	Gene	Annotation	HIGH	MODERATE	LOW	MODIFIER	3_prime_UTR_variant	5_prime_UTR_premature_start_codon_gain_variant	5_prime_UTR_variant	conservative_inframe_deletion	conservative_inframe_insertion	disruptive_inframe_deletion	disruptive_inframe_insertion	downstream_gene_variant	frameshift_variant	intron_variant	missense_variant	non_coding_transcript_variant	splice_donor_variant	splice_region_variant	start_lost	stop_gained	stop_lost	stop_retained_variant	synonymous_variant	upstream_gene_variant
SMEL3Ch05	37517165	37517632	SMEL_005g236880.1	Protein of unknown function	0	7	1	157	0	0	0	0	0	0	0	59	0	0	7	0	0	0	0	0	0	0	1	98
SMEL3Ch05	37536745	37537044	SMEL_005g236890.1	Similar to Polcalcin Cup a 4 (Hesperocyparis arizonica OX%3D49011)	0	5	6	178	0	0	0	0	0	0	0	76	0	0	5	0	0	0	0	0	0	0	6	102
SMEL3Ch05	37547232	37547525	SMEL_005g236900.1	Similar to SYRV3: Polcalcin Syr v 3 (Syringa vulgaris OX%3D34270)	0	1	2	309	0	0	0	0	0	0	0	178	0	0	1	0	0	0	0	0	0	0	2	131
SMEL3Ch05	37506479	37506760	SMEL_005g236870.1	Protein of unknown function	0	0	0	67	0	0	0	0	0	0	0	67	0	0	0	0	0	0	0	0	0	0	0	0
SMEL3Ch05	37601025	37601912	SMEL_005g236910.1	Similar to BKI1: BRI1 kinase inhibitor 1 (Arabidopsis thaliana OX%3D3702)	0	0	0	168	0	0	0	0	0	0	0	168	0	0	0	0	0	0	0	0	0	0	0	0

## Sheet: P-UNKN 5.1
Ch	Start	END	Gene	Annotation	HIGH	MODERATE	LOW	MODIFIER	3_prime_UTR_variant	5_prime_UTR_premature_start_codon_gain_variant	5_prime_UTR_variant	conservative_inframe_deletion	conservative_inframe_insertion	disruptive_inframe_deletion	disruptive_inframe_insertion	downstream_gene_variant	frameshift_variant	intron_variant	missense_variant	non_coding_transcript_variant	splice_donor_variant	splice_region_variant	start_lost	stop_gained	stop_lost	stop_retained_variant	synonymous_variant	upstream_gene_variant
SMEL3Ch05	38615541	38618559	SMEL_005g238070.1	Similar to Bp10: L-ascorbate oxidase homolog (Brassica napus OX%3D3708)	0	4	1	61	1	0	0	0	0	0	0	21	0	10	4	0	0	0	0	0	0	0	1	29
SMEL3Ch05	38627415	38635688	SMEL_005g238090.1	Similar to PCFS4: Polyadenylation and cleavage factor homolog 4 (Arabidopsis thaliana OX%3D3702)	0	2	0	44	2	0	0	0	0	0	0	11	0	10	2	0	0	0	0	0	0	0	0	21
SMEL3Ch05	38717586	38720093	SMEL_005g238210.1	Similar to Catalase (Solanum melongena OX%3D4111)	0	2	1	30	3	0	0	0	0	0	0	10	0	0	2	0	0	0	0	0	0	0	1	17
SMEL3Ch05	38454528	38462035	SMEL_005g237900.1	Protein of unknown function	0	1	1	9	0	0	0	0	0	0	0	2	0	8	1	0	0	1	0	0	0	0	0	0
SMEL3Ch05	38604462	38608140	SMEL_005g238060.1	Similar to Bp10: L-ascorbate oxidase homolog (Brassica napus OX%3D3708)	0	1	2	35	0	0	0	0	0	0	0	15	0	2	1	0	0	0	0	0	0	0	2	18
SMEL3Ch05	38411826	38416277	SMEL_005g237840.1	Similar to MO3: Monooxygenase 3 (Arabidopsis thaliana OX%3D3702)	0	0	0	5	0	0	0	0	0	0	0	0	0	0	0	0	0	0	0	0	0	0	0	5
SMEL3Ch05	38422057	38428570	SMEL_005g237860.1	Protein of unknown function	0	0	0	6	0	0	0	0	0	0	0	5	0	0	0	0	0	0	0	0	0	0	0	1
SMEL3Ch05	38439709	38440113	SMEL_005g237870.1	Similar to ATL23: E3 ubiquitin-protein ligase ATL23 (Arabidopsis thaliana OX%3D3702)	0	0	0	3	0	0	0	0	0	0	0	0	0	0	0	0	0	0	0	0	0	0	0	3
SMEL3Ch05	38449456	38450332	SMEL_005g237890.1	Similar to At1g76070: Uncharacterized protein At1g76070 (Arabidopsis thaliana OX%3D3702)	0	0	0	31	0	0	0	0	0	0	0	0	0	0	0	0	0	0	0	0	0	0	0	31
SMEL3Ch05	38463816	38469764	SMEL_005g237920.1	Similar to STY46: Serine/threonine-protein kinase STY46 (Arabidopsis thaliana OX%3D3702)	0	0	0	11	0	0	0	0	0	0	0	0	0	2	0	0	0	0	0	0	0	0	0	9
SMEL3Ch05	38474573	38476239	SMEL_005g237940.1	Similar to Glutathione S-transferase (Hyoscyamus muticus OX%3D35626)	0	0	0	15	0	0	0	0	0	0	0	15	0	0	0	0	0	0	0	0	0	0	0	0
SMEL3Ch05	38598283	38603076	SMEL_005g238050.1	Similar to ECH2: Enoyl-CoA hydratase 2%2C peroxisomal (Arabidopsis thaliana OX%3D3702)	0	0	0	52	1	0	0	0	0	0	0	29	0	13	0	0	0	0	0	0	0	0	0	9
SMEL3Ch05	38619523	38622256	SMEL_005g238080.1	Protein of unknown function	0	0	1	56	0	1	2	0	0	0	0	33	0	0	0	0	0	0	0	0	0	0	0	21
SMEL3Ch05	38636669	38643620	SMEL_005g238100.1	Similar to At5g42250: Alcohol dehydrogenase-like 7 (Arabidopsis thaliana OX%3D3702)	0	0	0	29	0	0	0	0	0	0	0	4	0	11	0	0	0	0	0	0	0	0	0	14
SMEL3Ch05	38650794	38654319	SMEL_005g238120.1	Similar to 4CLL5: 4-coumarate--CoA ligase-like 5 (Arabidopsis thaliana OX%3D3702)	0	0	0	3	0	0	0	0	0	0	0	3	0	0	0	0	0	0	0	0	0	0	0	0
SMEL3Ch05	38656388	38658564	SMEL_005g238130.1	Protein of unknown function	0	0	0	6	0	0	0	0	0	0	0	0	0	0	0	0	0	0	0	0	0	0	0	6
SMEL3Ch05	38664127	38664915	SMEL_005g238140.1	Similar to WEX: Werner Syndrome-like exonuclease (Arabidopsis thaliana OX%3D3702)	0	0	0	14	0	0	0	0	0	0	0	7	0	0	0	0	0	0	0	0	0	0	0	7
SMEL3Ch05	38669618	38672666	SMEL_005g238160.1	Protein of unknown function	0	0	0	23	1	0	0	0	0	0	0	6	0	2	0	0	0	0	0	0	0	0	0	14
SMEL3Ch05	38681468	38688841	SMEL_005g238170.1	Similar to OFUT16: O-fucosyltransferase 16 (Arabidopsis thaliana OX%3D3702)	0	0	2	52	0	0	0	0	0	0	0	6	0	41	0	0	0	2	0	0	0	0	2	5
SMEL3Ch05	38690954	38694459	SMEL_005g238180.1	Similar to CYCB2-3: Cyclin-B2-3 (Arabidopsis thaliana OX%3D3702)	0	0	0	25	0	0	0	0	0	0	0	23	0	0	0	0	0	0	0	0	0	0	0	2
SMEL3Ch05	38704710	38707137	SMEL_005g238200.1	Similar to PUB15: U-box domain-containing protein 15 (Arabidopsis thaliana OX%3D3702)	0	0	1	47	0	0	0	0	0	0	0	18	0	1	0	0	0	0	0	0	0	0	1	28
SMEL3Ch05	38743341	38747170	SMEL_005g238230.1	Similar to Catalase (Solanum melongena OX%3D4111)	0	0	1	1	0	0	0	0	0	0	0	0	0	1	0	0	0	0	0	0	0	0	1	0
SMEL3Ch05	38749176	38754087	SMEL_005g238240.1	Protein of unknown function	0	0	0	3	0	0	0	0	0	0	0	1	0	0	0	0	0	0	0	0	0	0	0	2
SMEL3Ch05	38755089	38758542	SMEL_005g238250.1	Similar to GAPB: Glyceraldehyde-3-phosphate dehydrogenase B%2C chloroplastic (Pisum sativum OX%3D3888)	0	0	0	2	0	0	0	0	0	0	0	1	0	1	0	0	0	0	0	0	0	0	0	0
SMEL3Ch05	38758951	38761453	SMEL_005g238260.1	Protein of unknown function	0	0	1	1	0	0	0	0	0	0	0	1	0	0	0	0	0	0	0	0	0	0	1	0
SMEL3Ch05	38763792	38766289	SMEL_005g238270.1	Similar to RPM1: Disease resistance protein RPM1 (Arabidopsis thaliana OX%3D3702)	0	0	0	2	0	0	0	0	0	0	0	1	0	0	0	0	0	0	0	0	0	0	0	1
SMEL3Ch05	38807810	38816017	SMEL_005g238280.1	Similar to RPP13L2: Putative disease resistance RPP13-like protein 2 (Arabidopsis thaliana OX%3D3702)	0	0	0	7	0	0	0	0	0	0	0	0	0	0	0	0	0	0	0	0	0	0	0	7
SMEL3Ch05	38831260	38834452	SMEL_005g238340.1	Similar to XCP1: Cysteine protease XCP1 (Arabidopsis thaliana OX%3D3702)	0	0	0	4	0	0	0	0	0	0	0	4	0	0	0	0	0	0	0	0	0	0	0	0
SMEL3Ch05	38837045	38845221	SMEL_005g238350.1	Similar to AHL10: AT-hook motif nuclear-localized protein 10 (Arabidopsis thaliana OX%3D3702)	0	0	0	4	0	0	0	0	0	0	0	0	0	4	0	0	0	0	0	0	0	0	0	0
SMEL3Ch05	38852121	38857289	SMEL_005g238380.1	Similar to PPD3: PsbP domain-containing protein 3%2C chloroplastic (Arabidopsis thaliana OX%3D3702)	0	0	0	3	0	0	0	0	0	0	0	0	0	0	0	0	0	0	0	0	0	0	0	3
SMEL3Ch05	38857801	38870114	SMEL_005g238400.1	Similar to ARID5: AT-rich interactive domain-containing protein 5 (Arabidopsis thaliana OX%3D3702)	0	0	0	1	0	0	0	0	0	0	0	0	0	1	0	0	0	0	0	0	0	0	0	0
SMEL3Ch05	38871700	38886665	SMEL_005g238410.1	Similar to PILS1: Protein PIN-LIKES 1 (Arabidopsis thaliana OX%3D3702)	0	0	0	1	0	0	0	0	0	0	0	0	0	1	0	0	0	0	0	0	0	0	0	0
SMEL3Ch05	38914695	38919217	SMEL_005g238460.1	Similar to URGT1: UDP-rhamnose/UDP-galactose transporter 1 (Arabidopsis thaliana OX%3D3702)	0	0	0	58	0	0	0	0	0	0	0	0	0	0	0	0	0	0	0	0	0	0	0	58
SMEL3Ch05	38923576	38938610	SMEL_005g238470.1	Similar to ATJ10: Chaperone protein dnaJ 10 (Arabidopsis thaliana OX%3D3702)	0	0	2	94	0	1	5	0	0	0	0	58	0	31	0	0	0	0	0	0	0	0	1	0
SMEL3Ch05	38406135	38408590	SMEL_005g237830.1	Similar to EXPA1: Expansin-A1 (Oryza sativa subsp. japonica OX%3D39947)
SMEL3Ch05	38470291	38473932	SMEL_005g237930.1	Similar to MSL8: Mechanosensitive ion channel protein 8 (Arabidopsis thaliana OX%3D3702)
SMEL3Ch05	38575088	38578046	SMEL_005g238020.1	Similar to HMGB9: High mobility group B protein 9 (Arabidopsis thaliana OX%3D3702)
SMEL3Ch05	38816919	38818652	SMEL_005g238300.1	Similar to Os08g0121900: Glycosyltransferase family 92 protein Os08g0121900 (Oryza sativa subsp. japonica OX%3D39947)
SMEL3Ch05	38820275	38824922	SMEL_005g238320.1	Similar to PBL21: Probable serine/threonine-protein kinase PBL21 (Arabidopsis thaliana OX%3D3702)
SMEL3Ch05	38826873	38827448	SMEL_005g238330.1	Similar to ATL80: RING-H2 finger protein ATL80 (Arabidopsis thaliana OX%3D3702)
SMEL3Ch05	38891333	38898934	SMEL_005g238420.1	Similar to PFP-ALPHA: Pyrophosphate--fructose 6-phosphate 1-phosphotransferase subunit alpha (Solanum tuberosum OX%3D4113)
SMEL3Ch05	38900265	38906653	SMEL_005g238430.1	Protein of unknown function
SMEL3Ch05	38907681	38911887	SMEL_005g238450.1	Similar to At1g76660: Uncharacterized protein At1g76660 (Arabidopsis thaliana OX%3D3702)

## Sheet: F-P POLY 5
Ch	Start	END	Gene	Annotation	HIGH	MODERATE	LOW	MODIFIER	3_prime_UTR_variant	5_prime_UTR_premature_start_codon_gain_variant	5_prime_UTR_variant	conservative_inframe_deletion	conservative_inframe_insertion	disruptive_inframe_deletion	disruptive_inframe_insertion	downstream_gene_variant	frameshift_variant	intron_variant	missense_variant	non_coding_transcript_variant	splice_donor_variant	splice_region_variant	start_lost	stop_gained	stop_lost	stop_retained_variant	synonymous_variant	upstream_gene_variant
SMEL3Ch05	39932283	39934587	SMEL_005g240620.1	Similar to At5g48380: Probably inactive leucine-rich repeat receptor-like protein kinase At5g48380 (Arabidopsis thaliana OX%3D3702)	1	21	8	30	0	0	0	0	0	0	0	18	0	5	21	0	1	1	0	0	0	1	7	8
SMEL3Ch05	40488995	40489210	SMEL_005g237380.1	Protein of unknown function	1	9	1	32	0	0	0	0	0	0	0	4	0	0	9	0	0	0	0	1	0	0	1	28
SMEL3Ch05	39671716	39677529	SMEL_005g240050.1	Similar to N: TMV resistance protein N (Nicotiana glutinosa OX%3D35889)	1	0	0	0	0	0	0	0	0	0	0	0	1	0	0	0	0	0	0	0	0	0	0	0
SMEL3Ch05	39849014	39850369	SMEL_005g240400.1	Similar to SALAT: Salutaridinol 7-O-acetyltransferase (Papaver somniferum OX%3D3469)	0	25	16	192	0	0	0	0	0	0	0	93	0	0	25	0	0	0	0	0	0	0	16	99
SMEL3Ch05	39852148	39853482	SMEL_005g240420.1	Similar to BEAT: Acetyl-CoA-benzylalcohol acetyltransferase (Clarkia breweri OX%3D36903)	0	23	13	207	0	0	0	0	0	0	0	72	0	0	23	0	0	0	0	0	0	0	13	135
SMEL3Ch05	39869911	39871263	SMEL_005g240450.1	Similar to BEAT: Acetyl-CoA-benzylalcohol acetyltransferase (Clarkia breweri OX%3D36903)	0	11	0	88	0	0	0	0	0	0	0	33	0	0	11	0	0	0	0	0	0	0	0	55
SMEL3Ch05	40125859	40133087	SMEL_005g240900.1	Similar to N: TMV resistance protein N (Nicotiana glutinosa OX%3D35889)	0	8	6	168	19	0	6	0	0	0	0	26	0	0	8	0	0	2	0	0	0	0	4	117
SMEL3Ch05	39905215	39906558	SMEL_005g240550.1	Similar to BEAT: Acetyl-CoA-benzylalcohol acetyltransferase (Clarkia breweri OX%3D36903)	0	7	5	55	0	0	0	0	0	0	0	12	0	0	7	0	0	0	0	0	0	0	5	43
SMEL3Ch05	40094847	40096782	SMEL_005g240880.1	Similar to N: TMV resistance protein N (Nicotiana glutinosa OX%3D35889)	0	7	7	56	0	0	0	0	0	0	0	51	0	0	7	0	0	0	0	0	0	0	7	5
SMEL3Ch05	39893655	39895010	SMEL_005g240520.1	Similar to BEAT: Acetyl-CoA-benzylalcohol acetyltransferase (Clarkia breweri OX%3D36903)	0	6	13	118	0	0	0	0	0	0	0	50	0	0	6	0	0	0	0	0	0	0	13	68
SMEL3Ch05	39816134	39821317	SMEL_005g240320.1	Similar to UGT9: UDP glycosyltransferase 9 (Catharanthus roseus OX%3D4058)	0	5	0	31	0	0	0	0	0	0	0	15	0	8	5	0	0	0	0	0	0	0	0	8
SMEL3Ch05	40046630	40051292	SMEL_005g240860.1	Similar to PER46: Peroxidase 46 (Arabidopsis thaliana OX%3D3702)	0	5	2	68	0	0	0	0	0	0	0	18	0	24	5	0	0	0	0	0	0	0	2	26
SMEL3Ch05	39837905	39839263	SMEL_005g240370.1	Similar to SALAT: Salutaridinol 7-O-acetyltransferase (Papaver somniferum OX%3D3469)	0	4	0	44	0	0	0	0	0	0	0	17	0	0	4	0	0	0	0	0	0	0	0	27
SMEL3Ch05	39610273	39614434	SMEL_005g239880.1	Similar to REIL1: Cytoplasmic 60S subunit biogenesis factor REI1 homolog 1 (Arabidopsis thaliana OX%3D3702)	0	3	1	43	0	0	0	0	0	0	0	15	0	6	3	0	0	0	0	0	0	0	1	22
SMEL3Ch05	39835778	39837121	SMEL_005g240350.1	Similar to BEAT: Acetyl-CoA-benzylalcohol acetyltransferase (Clarkia breweri OX%3D36903)	0	3	0	40	0	0	0	0	0	0	0	28	0	0	3	0	0	0	0	0	0	0	0	12
SMEL3Ch05	40031126	40036688	SMEL_005g240830.1	Similar to APY1: Apyrase 1 (Arabidopsis thaliana OX%3D3702)	0	3	0	171	0	0	2	0	0	0	0	126	0	9	3	0	0	0	0	0	0	0	0	34
SMEL3Ch05	39810936	39813240	SMEL_005g240300.1	Similar to UGT74AE2: UDP-glucosyltransferase 74AE2 (Panax ginseng OX%3D4054)	0	2	0	42	0	0	0	0	0	0	0	22	0	1	2	0	0	0	0	0	0	0	0	19
SMEL3Ch05	39922709	39925366	SMEL_005g240600.1	Similar to Polygalacturonase (Prunus persica OX%3D3760)	0	2	0	21	0	0	0	0	0	0	0	9	0	1	2	0	0	0	0	0	0	0	0	11
SMEL3Ch05	39979751	39986092	SMEL_005g240740.1	Similar to LARP6B: La-related protein 6B (Arabidopsis thaliana OX%3D3702)	0	2	4	38	2	0	0	0	0	0	0	14	0	18	2	0	0	2	0	0	0	0	4	4
SMEL3Ch05	40000581	40001726	SMEL_005g240770.1	Similar to AAE: Acetylajmalan esterase (Rauvolfia serpentina OX%3D4060)	0	2	1	42	0	0	0	0	0	0	0	21	0	0	2	0	0	0	0	0	0	0	1	21
SMEL3Ch05	40015658	40022339	SMEL_005g240810.1	Similar to POT4: Potassium transporter 4 (Arabidopsis thaliana OX%3D3702)	0	2	0	291	0	0	0	0	0	0	0	28	0	6	2	0	0	0	0	0	0	0	0	257
SMEL3Ch05	40142221	40149461	SMEL_005g240910.1	Similar to CTPA2: Carboxyl-terminal-processing peptidase 2%2C chloroplastic (Arabidopsis thaliana OX%3D3702)	0	2	5	252	0	0	0	0	0	0	0	126	0	43	2	0	0	3	0	0	0	0	3	85
SMEL3Ch05	40166523	40176250	SMEL_005g240940.1	Similar to BLI: Protein BLISTER (Arabidopsis thaliana OX%3D3702)	0	2	0	16	0	0	0	0	0	0	0	6	0	2	2	0	0	0	0	0	0	0	0	8
SMEL3Ch05	40210128	40214236	SMEL_005g240990.1	Similar to At2g33170: Probable leucine-rich repeat receptor-like protein kinase At2g33170 (Arabidopsis thaliana OX%3D3702)	0	2	1	27	0	0	0	0	0	0	0	18	0	0	2	0	0	0	0	0	0	0	1	9
SMEL3Ch05	39607326	39609229	SMEL_005g239870.1	Similar to B3GALT7: Beta-1%2C3-galactosyltransferase 7 (Arabidopsis thaliana OX%3D3702)	0	1	1	30	3	0	0	0	0	1	0	23	0	4	0	0	0	0	0	0	0	0	1	0
SMEL3Ch05	39616327	39621576	SMEL_005g239890.1	Protein of unknown function	0	1	0	41	0	0	0	0	0	0	0	15	0	8	1	0	0	0	0	0	0	0	0	18
SMEL3Ch05	39622095	39626620	SMEL_005g239920.1	Similar to TAF10: Transcription initiation factor TFIID subunit 10 (Arabidopsis thaliana OX%3D3702)	0	1	0	48	0	0	0	0	0	0	0	11	0	11	1	0	0	0	0	0	0	0	0	26
SMEL3Ch05	39628116	39628562	SMEL_005g239950.1	Similar to GDU2: Protein GLUTAMINE DUMPER 2 (Arabidopsis thaliana OX%3D3702)	0	1	0	46	0	0	0	0	0	0	0	15	0	0	1	0	0	0	0	0	0	0	0	31
SMEL3Ch05	39657857	39659731	SMEL_005g240020.1	Similar to PCMP-H61: Pentatricopeptide repeat-containing protein At5g66520 (Arabidopsis thaliana OX%3D3702)	0	1	0	0	0	0	0	0	0	0	0	0	0	0	1	0	0	0	0	0	0	0	0	0
SMEL3Ch05	39706487	39711785	SMEL_005g240090.1	Similar to N: TMV resistance protein N (Nicotiana glutinosa OX%3D35889)	0	1	4	2	0	0	0	0	0	0	0	0	0	0	1	0	0	0	0	0	0	0	4	2
SMEL3Ch05	39808395	39809363	SMEL_005g240290.1	Similar to At2g39020: Probable acetyltransferase NATA1-like (Arabidopsis thaliana OX%3D3702)	0	1	2	27	1	0	0	0	0	0	0	19	0	0	1	0	0	0	0	0	0	0	2	7
SMEL3Ch05	39823739	39835090	SMEL_005g240340.1	Protein of unknown function	0	1	0	43	1	0	4	0	0	0	0	6	0	10	1	0	0	0	0	0	0	0	0	22
SMEL3Ch05	39912517	39915433	SMEL_005g240580.1	Similar to Polygalacturonase (Prunus persica OX%3D3760)	0	1	2	67	2	0	0	0	0	0	0	17	0	1	1	0	0	0	0	0	0	0	2	47
SMEL3Ch05	39964757	39972904	SMEL_005g240700.1	Similar to IP5P12: Type I inositol polyphosphate 5-phosphatase 12 (Arabidopsis thaliana OX%3D3702)	0	1	1	18	2	0	0	0	0	0	0	13	0	2	1	0	0	1	0	0	0	0	1	1
SMEL3Ch05	40004356	40010850	SMEL_005g240780.1	Similar to PARG1: Poly(ADP-ribose) glycohydrolase 1 (Arabidopsis thaliana OX%3D3702)	0	1	0	53	0	0	0	0	0	0	0	20	0	5	1	0	0	0	0	0	0	0	0	28
SMEL3Ch05	40152853	40153859	SMEL_005g240920.1	Similar to LEA7: Late embryogenesis abundant protein 7 (Arabidopsis thaliana OX%3D3702)	0	1	1	165	0	0	0	0	0	0	0	40	0	50	1	0	0	1	0	0	0	0	0	76
SMEL3Ch05	40198743	40200448	SMEL_005g240980.1	Similar to CHSJ: Chalcone synthase J (Petunia hybrida OX%3D4102)	0	1	0	28	0	0	0	0	0	0	0	10	0	0	1	0	0	0	0	0	0	0	0	18
SMEL3Ch05	40220474	40220914	SMEL_005g241000.1	Similar to SPH2: S-protein homolog 2 (Arabidopsis thaliana OX%3D3702)	0	1	1	46	0	0	0	0	0	0	0	22	0	0	1	0	0	0	0	0	0	0	1	24
SMEL3Ch05	40477271	40477684	SMEL_005g237330.1	Similar to SAUR66: Auxin-responsive protein SAUR66 (Arabidopsis thaliana OX%3D3702)	0	0	0	31	0	0	0	0	0	0	0	0	0	0	0	0	0	0	0	0	0	0	0	31
SMEL3Ch05	40478325	40478498	SMEL_005g237340.1	Protein of unknown function	0	0	0	31	0	0	0	0	0	0	0	31	0	0	0	0	0	0	0	0	0	0	0	0
SMEL3Ch05	40478661	40479140	SMEL_005g237350.1	Similar to SAUR66: Auxin-responsive protein SAUR66 (Arabidopsis thaliana OX%3D3702)	0	0	0	32	0	0	0	0	0	0	0	32	0	0	0	0	0	0	0	0	0	0	0	0
SMEL3Ch05	40479963	40484382	SMEL_005g237360.1	Protein of unknown function	0	0	0	56	0	0	0	0	0	0	0	0	0	33	0	0	0	0	0	0	0	0	0	23
SMEL3Ch05	40488223	40488669	SMEL_005g237370.1	Similar to SAUR66: Auxin-responsive protein SAUR66 (Arabidopsis thaliana OX%3D3702)	0	0	0	43	0	0	0	0	0	0	0	4	0	0	0	0	0	0	0	0	0	0	0	39
SMEL3Ch05	40572576	40573055	SMEL_005g237420.1	Protein of unknown function	0	0	0	3	0	0	0	0	0	0	0	1	0	0	0	0	0	0	0	0	0	0	0	2
SMEL3Ch05	40604375	40610932	SMEL_005g237460.1	Similar to UP3: Stress-response A/B barrel domain-containing protein UP3 (Arabidopsis thaliana OX%3D3702)	0	0	0	34	0	0	0	0	0	0	0	0	0	29	0	0	0	0	0	0	0	0	0	5
SMEL3Ch05	40622698	40623390	SMEL_005g237480.1	Similar to Pathogenesis-related protein R major form (Nicotiana tabacum OX%3D4097)	0	0	0	5	0	0	0	0	0	0	0	5	0	0	0	0	0	0	0	0	0	0	0	0
SMEL3Ch05	40654600	40656681	SMEL_005g237550.1	Similar to PP2A13: F-box protein PP2-A13 (Arabidopsis thaliana OX%3D3702)	0	0	0	7	0	0	0	0	0	0	0	7	0	0	0	0	0	0	0	0	0	0	0	0
SMEL3Ch05	40668578	40673147	SMEL_005g237570.1	Similar to LPLAT1: Lysophospholipid acyltransferase 1 (Arabidopsis thaliana OX%3D3702)	0	0	0	19	0	0	0	0	0	0	0	0	0	0	0	0	0	0	0	0	0	0	0	19
SMEL3Ch05	40692407	40705603	SMEL_005g237600.1	Similar to At4g22990: SPX domain-containing membrane protein At4g22990 (Arabidopsis thaliana OX%3D3702)	0	0	0	1	0	0	0	0	0	0	0	1	0	0	0	0	0	0	0	0	0	0	0	0
SMEL3Ch05	40706948	40707466	SMEL_005g237620.1	Similar to PMEI: Pectinesterase inhibitor (Actinidia deliciosa OX%3D3627)	0	0	0	1	0	0	0	0	0	0	0	1	0	0	0	0	0	0	0	0	0	0	0	0
SMEL3Ch05	40775594	40776809	SMEL_005g237730.1	Similar to SOC1: MADS-box protein SOC1 (Arabidopsis thaliana OX%3D3702)	0	0	0	3	0	0	0	0	0	0	0	3	0	0	0	0	0	0	0	0	0	0	0	0
SMEL3Ch05	40790170	40792171	SMEL_005g237750.1	Similar to MADS50: MADS-box transcription factor 50 (Oryza sativa subsp. japonica OX%3D39947)	0	0	0	16	0	0	0	0	0	0	0	13	0	0	0	0	0	0	0	0	0	0	0	3
SMEL3Ch05	40828851	40831462	SMEL_005g237810.1	Similar to SGR: Protein STAY-GREEN homolog%2C chloroplastic (Capsicum annuum OX%3D4072)	0	0	0	9	0	0	0	0	0	0	0	9	0	0	0	0	0	0	0	0	0	0	0	0
SMEL3Ch05	40831700	40841401	SMEL_005g237820.1	Similar to FZR2: Protein FIZZY-RELATED 2 (Arabidopsis thaliana OX%3D3702)	0	0	0	14	0	0	0	0	0	0	0	0	0	14	0	0	0	0	0	0	0	0	0	0
SMEL3Ch05	40842775	40844294	SMEL_005g237850.1	Similar to Mavicyanin (Cucurbita pepo OX%3D3663)	0	0	0	3	0	0	0	0	0	0	0	3	0	0	0	0	0	0	0	0	0	0	0	0
SMEL3Ch05	40925272	40925700	SMEL_005g237950.1	Similar to rpl2-B: 50S ribosomal protein L2-B%2C chloroplastic (Coffea arabica OX%3D13443)	0	0	0	1	0	0	0	0	0	0	0	0	0	0	0	0	0	0	0	0	0	0	0	1
SMEL3Ch05	40926734	40949912	SMEL_005g237960.1	Similar to SEC5A: Exocyst complex component SEC5A (Arabidopsis thaliana OX%3D3702)	0	0	0	1	0	0	0	0	0	0	0	1	0	0	0	0	0	0	0	0	0	0	0	0
SMEL3Ch05	39620783	39621097	SMEL_005g239910.1	Protein of unknown function	0	0	2	22	0	0	0	0	0	0	0	9	0	0	0	0	0	0	0	0	0	0	2	13
SMEL3Ch05	39622234	39622404	SMEL_005g239930.1	Protein of unknown function	0	0	0	23	0	0	0	0	0	0	0	12	0	0	0	0	0	0	0	0	0	0	0	11
SMEL3Ch05	39631768	39632232	SMEL_005g239970.1	Similar to GDU4: Protein GLUTAMINE DUMPER 4 (Arabidopsis thaliana OX%3D3702)	0	0	1	46	0	0	0	0	0	0	0	28	0	0	0	0	0	0	0	0	0	0	1	18
SMEL3Ch05	39651794	39653235	SMEL_005g240000.1	Similar to COL4: Zinc finger protein CONSTANS-LIKE 4 (Arabidopsis thaliana OX%3D3702)	0	0	0	8	0	0	0	0	0	0	0	0	0	0	0	0	0	0	0	0	0	0	0	8
SMEL3Ch05	39659792	39667027	SMEL_005g240030.1	Similar to WIN2: Probable protein phosphatase 2C 59 (Arabidopsis thaliana OX%3D3702)	0	0	0	2	0	0	0	0	0	0	0	1	0	0	0	0	0	0	0	0	0	0	0	1
SMEL3Ch05	39678769	39684310	SMEL_005g240070.1	Similar to SNC1: Protein SUPPRESSOR OF npr1-1%2C CONSTITUTIVE 1 (Arabidopsis thaliana OX%3D3702)	0	0	0	2	0	0	0	0	0	0	0	2	0	0	0	0	0	0	0	0	0	0	0	0
SMEL3Ch05	39694428	39700773	SMEL_005g240080.1	Similar to N: TMV resistance protein N (Nicotiana glutinosa OX%3D35889)	0	0	0	6	0	0	0	0	0	0	0	2	0	0	0	0	0	0	0	0	0	0	0	4
SMEL3Ch05	39722922	39727148	SMEL_005g240100.1	Similar to SUVH9: Histone-lysine N-methyltransferase family member SUVH9 (Arabidopsis thaliana OX%3D3702)	0	0	0	3	0	0	1	0	0	0	0	2	0	0	0	0	0	0	0	0	0	0	0	0
SMEL3Ch05	39728822	39731082	SMEL_005g240110.1	Similar to IAA13: Auxin-responsive protein IAA13 (Arabidopsis thaliana OX%3D3702)	0	0	0	3	0	0	0	0	0	0	0	2	0	0	0	0	0	0	0	0	0	0	0	1
SMEL3Ch05	39735211	39737536	SMEL_005g240120.1	Similar to SRC2: Protein SRC2 (Glycine max OX%3D3847)	0	0	0	3	0	0	0	0	0	0	0	1	0	0	0	0	0	0	0	0	0	0	0	2
SMEL3Ch05	39739280	39740466	SMEL_005g240130.1	Similar to STH-2: Pathogenesis-related protein STH-2 (Solanum tuberosum OX%3D4113)	0	0	0	2	0	0	0	0	0	0	0	0	0	2	0	0	0	0	0	0	0	0	0	0
SMEL3Ch05	39743657	39746316	SMEL_005g240140.1	Protein of unknown function	0	0	0	4	0	0	0	0	0	0	0	2	0	0	0	0	0	0	0	0	0	0	0	2
SMEL3Ch05	39752189	39755104	SMEL_005g240150.1	Similar to COL3: Zinc finger protein CONSTANS-LIKE 3 (Arabidopsis thaliana OX%3D3702)	0	0	0	3	0	0	0	0	0	0	0	1	0	0	0	0	0	0	0	0	0	0	0	2
SMEL3Ch05	39755348	39759236	SMEL_005g240160.1	Similar to SOP1: Peroxygenase (Sesamum indicum OX%3D4182)	0	0	0	1	0	0	0	0	0	0	0	0	0	1	0	0	0	0	0	0	0	0	0	0
SMEL3Ch05	39761942	39767528	SMEL_005g240170.1	Similar to RPP8L2: Probable disease resistance RPP8-like protein 2 (Arabidopsis thaliana OX%3D3702)	0	0	0	1	0	0	0	0	0	0	0	1	0	0	0	0	0	0	0	0	0	0	0	0
SMEL3Ch05	39777618	39784611	SMEL_005g240210.1	Similar to N: TMV resistance protein N (Nicotiana glutinosa OX%3D35889)	0	0	0	2	0	0	0	0	0	0	0	2	0	0	0	0	0	0	0	0	0	0	0	0
SMEL3Ch05	39791296	39795374	SMEL_005g240240.1	Protein of unknown function	0	0	0	1	0	0	0	0	0	0	0	0	0	0	0	0	0	0	0	0	0	0	0	1
SMEL3Ch05	39801061	39805140	SMEL_005g240270.1	Similar to At1g09380: WAT1-related protein At1g09380 (Arabidopsis thaliana OX%3D3702)	0	0	0	20	0	0	0	0	0	0	0	18	0	1	0	0	0	0	0	0	0	0	0	1
SMEL3Ch05	39907305	39911708	SMEL_005g240570.1	Similar to DBR: 2-alkenal reductase (NADP(+)-dependent) (Nicotiana tabacum OX%3D4097)	0	0	0	86	0	0	0	0	0	0	0	40	0	9	0	0	0	0	0	0	0	0	0	37
SMEL3Ch05	39925344	39927706	SMEL_005g240610.1	Similar to Polygalacturonase (Prunus persica OX%3D3760)	0	0	0	24	0	0	0	0	0	0	0	4	0	1	0	0	0	0	0	0	0	0	0	19
SMEL3Ch05	39936598	39938809	SMEL_005g240640.1	Similar to RPL9B: 60S ribosomal protein L9-1 (Arabidopsis thaliana OX%3D3702)	0	0	0	53	0	0	0	0	0	0	0	9	0	0	0	0	0	0	0	0	0	0	0	44
SMEL3Ch05	39940458	39944073	SMEL_005g240650.1	Similar to NBP35: Cytosolic Fe-S cluster assembly factor NBP35 (Arabidopsis thaliana OX%3D3702)	0	0	1	13	0	0	0	0	0	0	0	4	0	3	0	0	0	0	0	0	0	0	1	6
SMEL3Ch05	39945147	39947384	SMEL_005g240660.1	Similar to PCMP-H44: Pentatricopeptide repeat-containing protein At2g03880%2C mitochondrial (Arabidopsis thaliana OX%3D3702)	0	0	0	16	0	0	0	0	0	0	0	10	0	0	0	0	0	0	0	0	0	0	0	6
SMEL3Ch05	39950503	39952150	SMEL_005g240670.1	Similar to At5g02620: Ankyrin repeat-containing protein At5g02620 (Arabidopsis thaliana OX%3D3702)	0	0	1	19	0	0	0	0	0	0	0	11	0	1	0	0	0	1	0	0	0	0	0	8
SMEL3Ch05	39962002	39963054	SMEL_005g240690.1	Similar to At5g02620: Ankyrin repeat-containing protein At5g02620 (Arabidopsis thaliana OX%3D3702)	0	0	0	39	0	0	0	0	0	0	0	6	0	0	0	0	0	0	0	0	0	0	0	33
SMEL3Ch05	39973861	39978379	SMEL_005g240720.1	Similar to VPS20.2: Vacuolar protein sorting-associated protein 20 homolog 2 (Arabidopsis thaliana OX%3D3702)	0	0	0	18	0	0	0	0	0	0	0	4	0	1	0	0	0	0	0	0	0	0	0	13
SMEL3Ch05	39990194	39991483	SMEL_005g240750.1	Protein of unknown function	0	0	0	28	0	0	0	0	0	0	0	10	0	0	0	0	0	0	0	0	0	0	0	18
SMEL3Ch05	40011938	40015366	SMEL_005g240800.1	Similar to At2g44050: 6%2C7-dimethyl-8-ribityllumazine synthase%2C chloroplastic (Arabidopsis thaliana OX%3D3702)	0	0	0	34	2	0	0	0	0	0	0	6	0	9	0	0	0	0	0	0	0	0	0	17
SMEL3Ch05	40030262	40030384	SMEL_005g240820.1	Protein of unknown function	0	0	0	195	0	0	0	0	0	0	0	182	0	0	0	0	0	0	0	0	0	0	0	13
SMEL3Ch05	40037653	40041428	SMEL_005g240840.1	Similar to TIC55: Protein TIC 55%2C chloroplastic (Pisum sativum OX%3D3888)	0	0	3	66	4	0	0	0	0	0	0	29	0	16	0	0	0	0	0	0	0	0	3	17
SMEL3Ch05	40042562	40045414	SMEL_005g240850.1	Similar to RPS10-1: 40S ribosomal protein S10-1 (Oryza sativa subsp. japonica OX%3D39947)	0	0	0	79	1	0	0	0	0	0	0	40	0	6	0	0	0	0	0	0	0	0	0	32
SMEL3Ch05	40055003	40060002	SMEL_005g240870.1	Similar to N: TMV resistance protein N (Nicotiana glutinosa OX%3D35889)	0	0	1	136	0	0	0	0	0	0	0	29	0	2	0	0	0	1	0	0	0	0	0	106
SMEL3Ch05	40153976	40155354	SMEL_005g240930.1	Protein of unknown function	0	0	1	161	3	0	4	0	0	0	0	122	0	1	0	0	0	0	0	0	0	0	1	31
SMEL3Ch05	40182195	40184102	SMEL_005g240950.1	Similar to HSP26-A: Probable glutathione S-transferase (Glycine max OX%3D3847)	0	0	0	11	0	0	0	0	0	0	0	4	0	0	0	0	0	0	0	0	0	0	0	7
SMEL3Ch05	40188085	40189394	SMEL_005g240960.1	Protein of unknown function	0	0	0	37	0	0	1	0	0	0	0	5	0	3	0	0	0	0	0	0	0	0	0	28
SMEL3Ch05	40196743	40197969	SMEL_005g240970.1	Similar to DIR16: Dirigent protein 16 (Arabidopsis thaliana OX%3D3702)	0	0	1	30	0	0	0	0	0	0	0	13	0	0	0	0	0	0	0	0	0	0	1	17
SMEL3Ch05	40225727	40226596	SMEL_005g241010.1	Similar to MIOX5: Inositol oxygenase 5 (Arabidopsis thaliana OX%3D3702)	0	0	0	24	0	0	0	0	0	0	0	0	0	0	0	0	0	0	0	0	0	0	0	24
SMEL3Ch05	40227543	40227956	SMEL_005g241020.1	Protein of unknown function	0	0	0	6	0	0	0	0	0	0	0	6	0	0	0	0	0	0	0	0	0	0	0	0
SMEL3Ch05	40236947	40242718	SMEL_005g241040.1	Similar to KAB1: Probable voltage-gated potassium channel subunit beta (Arabidopsis thaliana OX%3D3702)	0	0	0	2	0	0	0	0	0	0	0	2	0	0	0	0	0	0	0	0	0	0	0	0
SMEL3Ch05	40252054	40276976	SMEL_005g241050.1	Similar to ALY3: Protein ALWAYS EARLY 3 (Arabidopsis thaliana OX%3D3702)	0	0	0	2	0	0	0	0	0	0	0	1	0	1	0	0	0	0	0	0	0	0	0	0
SMEL3Ch05	40337487	40344254	SMEL_005g241100.1	Similar to PP2B10: F-box protein PP2-B10 (Arabidopsis thaliana OX%3D3702)	0	0	0	4	0	0	0	0	0	0	0	0	0	3	0	0	0	0	0	0	0	0	0	1
SMEL3Ch05	40358749	40360016	SMEL_005g241110.1	Similar to PP2B10: F-box protein PP2-B10 (Arabidopsis thaliana OX%3D3702)	0	0	0	62	0	0	0	0	0	0	0	0	0	0	0	0	0	0	0	0	0	0	0	62
SMEL3Ch05	40369403	40370580	SMEL_005g241120.1	Similar to PP2B10: F-box protein PP2-B10 (Arabidopsis thaliana OX%3D3702)	0	0	0	8	0	0	0	0	0	0	0	1	0	0	0	0	0	0	0	0	0	0	0	7
SMEL3Ch05	40373107	40381074	SMEL_005g241130.1	Similar to PDR1: Pleiotropic drug resistance protein 1 (Nicotiana tabacum OX%3D4097)	0	0	0	9	0	0	0	0	0	0	0	7	0	0	0	0	0	0	0	0	0	0	0	2
SMEL3Ch05	40386475	40389361	SMEL_005g241140.1	Protein of unknown function	0	0	0	1	0	0	0	0	0	0	0	1	0	0	0	0	0	0	0	0	0	0	0	0
SMEL3Ch05	40398136	40398384	SMEL_005g241170.1	Protein of unknown function	0	0	0	2	0	0	0	0	0	0	0	0	0	0	0	0	0	0	0	0	0	0	0	2
SMEL3Ch05	40400361	40400609	SMEL_005g241180.1	Protein of unknown function	0	0	0	2	0	0	0	0	0	0	0	0	0	0	0	0	0	0	0	0	0	0	0	2
SMEL3Ch05	40404513	40404761	SMEL_005g241190.1	Protein of unknown function	0	0	0	3	0	0	0	0	0	0	0	2	0	0	0	0	0	0	0	0	0	0	0	1
SMEL3Ch05	40422290	40424430	SMEL_005g237280.1	Similar to GT16: Xyloglucan-specific galacturonosyltransferase 1 (Arabidopsis thaliana OX%3D3702)
SMEL3Ch05	40426752	40430183	SMEL_005g237290.1	Similar to HAL3A: Phosphopantothenoylcysteine decarboxylase (Arabidopsis thaliana OX%3D3702)
SMEL3Ch05	40438343	40438922	SMEL_005g237300.1	Similar to SAUR66: Auxin-responsive protein SAUR66 (Arabidopsis thaliana OX%3D3702)
SMEL3Ch05	40442615	40443058	SMEL_005g237310.1	Similar to SAUR66: Auxin-responsive protein SAUR66 (Arabidopsis thaliana OX%3D3702)
SMEL3Ch05	40443569	40444096	SMEL_005g237320.1	Similar to MBR2: E3 ubiquitin-protein ligase MBR2 (Arabidopsis thaliana OX%3D3702)
SMEL3Ch05	40497048	40503191	SMEL_005g237390.1	Similar to At1g63430: Probable LRR receptor-like serine/threonine-protein kinase At1g63430 (Arabidopsis thaliana OX%3D3702)
SMEL3Ch05	40539389	40541041	SMEL_005g237400.1	Similar to At3g14260: Protein LURP-one-related 11 (Arabidopsis thaliana OX%3D3702)
SMEL3Ch05	40552339	40553278	SMEL_005g237410.1	Similar to At1g63410: Protein LURP-one-related 4 (Arabidopsis thaliana OX%3D3702)
SMEL3Ch05	40588428	40597504	SMEL_005g237450.1	Similar to RH26: DEAD-box ATP-dependent RNA helicase 26 (Arabidopsis thaliana OX%3D3702)
SMEL3Ch05	40630743	40633484	SMEL_005g237510.1	Similar to At1g12760: E3 ubiquitin-protein ligase At1g12760 (Arabidopsis thaliana OX%3D3702)
SMEL3Ch05	40687572	40688174	SMEL_005g237590.1	Similar to DREB1E: Dehydration-responsive element-binding protein 1E (Arabidopsis thaliana OX%3D3702)
SMEL3Ch05	40726657	40727779	SMEL_005g237650.1	Protein of unknown function
SMEL3Ch05	40737822	40737917	SMEL_005g237660.1	Protein of unknown function
SMEL3Ch05	40741560	40742084	SMEL_005g237670.1	Similar to PMEI: Pectinesterase inhibitor (Actinidia deliciosa OX%3D3627)
SMEL3Ch05	40755457	40759869	SMEL_005g237690.1	Similar to HMGS: Hydroxymethylglutaryl-CoA synthase (Arabidopsis thaliana OX%3D3702)
SMEL3Ch05	40875637	40877384	SMEL_005g237880.1	Similar to ACT7: Actin-7 (Arabidopsis thaliana OX%3D3702)
SMEL3Ch05	40888573	40891520	SMEL_005g237910.1	Similar to GT-2: Trihelix transcription factor GT-2 (Arabidopsis thaliana OX%3D3702)
SMEL3Ch05	40960316	40964925	SMEL_005g237970.1	Similar to Fructose-1%2C6-bisphosphatase%2C cytosolic (Solanum tuberosum OX%3D4113)
SMEL3Ch05	40970282	40970932	SMEL_005g237980.1	Similar to LIP2: Octanoyltransferase LIP2%2C mitochondrial (Arabidopsis thaliana OX%3D3702)
SMEL3Ch05	40973773	40974183	SMEL_005g237990.1	Similar to HTR2: Histone H3.2 (Arabidopsis thaliana OX%3D3702)
SMEL3Ch05	40976049	40976459	SMEL_005g238000.1	Similar to HTR2: Histone H3.2 (Arabidopsis thaliana OX%3D3702)
SMEL3Ch05	39787181	39788665	SMEL_005g240220.1	Similar to UGT84A13: Gallate 1-beta-glucosyltransferase (Quercus robur OX%3D38942)
SMEL3Ch05	40233107	40234995	SMEL_005g241030.1	Protein of unknown function
SMEL3Ch05	40279049	40280149	SMEL_005g241060.1	Similar to At3g06240: F-box/kelch-repeat protein At3g06240 (Arabidopsis thaliana OX%3D3702)
SMEL3Ch05	40280640	40280831	SMEL_005g241070.1	Protein of unknown function
SMEL3Ch05	40284742	40286930	SMEL_005g241080.1	Similar to VAMP726: Putative vesicle-associated membrane protein 726 (Arabidopsis thaliana OX%3D3702)
SMEL3Ch05	40287092	40289335	SMEL_005g241090.1	Similar to PP2B10: F-box protein PP2-B10 (Arabidopsis thaliana OX%3D3702)
SMEL3Ch05	40395307	40396038	SMEL_005g241150.1	Protein of unknown function
SMEL3Ch05	40395323	40395901	SMEL_005g241160.1	Protein of unknown function

## Sheet: F-GLYKO 6
Ch	Start	END	Gene	Annotation	HIGH	MODERATE	LOW	MODIFIER	3_prime_UTR_variant	5_prime_UTR_premature_start_codon_gain_variant	5_prime_UTR_variant	conservative_inframe_deletion	conservative_inframe_insertion	disruptive_inframe_deletion	disruptive_inframe_insertion	downstream_gene_variant	frameshift_variant	intron_variant	missense_variant	non_coding_transcript_variant	splice_donor_variant	splice_region_variant	start_lost	stop_gained	stop_lost	stop_retained_variant	synonymous_variant	upstream_gene_variant
SMEL3Ch06	97721963	97734969	SMEL_006g259360.1	Similar to N: TMV resistance protein N (Nicotiana glutinosa OX%3D35889)	0	17	2	23	0	0	0	0	0	0	0	0	0	21	17	0	0	0	0	0	0	0	2	2
SMEL3Ch06	97702575	97713222	SMEL_006g259350.1	Similar to N: TMV resistance protein N (Nicotiana glutinosa OX%3D35889)	0	6	3	33	0	0	0	0	0	0	0	0	0	31	6	0	0	0	0	0	0	0	3	2
SMEL3Ch06	96447541	96448377	SMEL_006g258370.1	Protein of unknown function	0	3	1	10	0	0	0	0	0	0	0	10	0	0	3	0	0	0	0	0	0	0	1	0
SMEL3Ch06	96655758	96656898	SMEL_006g258510.1	Similar to ndhH: NAD(P)H-quinone oxidoreductase subunit H%2C chloroplastic (Nandina domestica OX%3D41776)	0	3	0	2	0	0	0	0	0	0	0	0	0	2	3	0	0	0	0	0	0	0	0	0
SMEL3Ch06	96802097	96802339	SMEL_006g258660.1	Similar to DTX54: Protein DETOXIFICATION 54 (Arabidopsis thaliana OX%3D3702)	0	3	1	25	0	0	0	0	0	0	0	1	0	0	3	0	0	0	0	0	0	0	1	24
SMEL3Ch06	97249114	97252481	SMEL_006g258940.1	Similar to At5g11310: Pentatricopeptide repeat-containing protein At5g11310%2C mitochondrial (Arabidopsis thaliana OX%3D3702)	0	3	0	7	0	0	0	0	0	0	0	2	0	5	3	0	0	0	0	0	0	0	0	0
SMEL3Ch06	98105165	98105943	SMEL_006g259650.1	Similar to CIPK33: CBL-interacting protein kinase 33 (Oryza sativa subsp. japonica OX%3D39947)	0	3	3	16	0	0	0	0	0	0	0	7	0	5	3	0	0	1	0	0	0	0	2	5
SMEL3Ch06	96807222	96807461	SMEL_006g258670.1	Similar to DTX54: Protein DETOXIFICATION 54 (Arabidopsis thaliana OX%3D3702)	0	2	0	16	0	0	0	0	0	0	0	3	0	0	2	0	0	0	0	0	0	0	0	13
SMEL3Ch06	96949853	96950800	SMEL_006g258740.1	Similar to MAPKKK17: Mitogen-activated protein kinase kinase kinase 17 (Arabidopsis thaliana OX%3D3702)	0	2	1	29	0	0	0	0	0	0	0	12	0	0	2	0	0	0	0	0	0	0	1	17
SMEL3Ch06	98089429	98092005	SMEL_006g259610.1	Similar to MAN2: Mannan endo-1%2C4-beta-mannosidase 2 (Solanum lycopersicum OX%3D4081)	0	2	1	8	0	0	0	0	0	0	0	6	0	0	2	0	0	0	0	0	0	0	1	2
SMEL3Ch06	98102030	98102617	SMEL_006g259640.1	Similar to AGL62: Agamous-like MADS-box protein AGL62 (Arabidopsis thaliana OX%3D3702)	0	2	3	18	0	0	0	0	0	0	0	17	0	0	2	0	0	0	0	0	0	0	3	1
SMEL3Ch06	96218532	96221661	SMEL_006g258210.1	Similar to GXM3: Glucuronoxylan 4-O-methyltransferase 3 (Arabidopsis thaliana OX%3D3702)	0	1	1	0	0	0	0	0	0	0	0	0	0	0	1	0	0	0	0	0	0	0	1	0
SMEL3Ch06	98099170	98099835	SMEL_006g259630.1	Similar to AGL61: Agamous-like MADS-box protein AGL61 (Arabidopsis thaliana OX%3D3702)	0	1	0	5	0	0	0	0	0	0	0	5	0	0	1	0	0	0	0	0	0	0	0	0
SMEL3Ch06	96322773	96334513	SMEL_006g258250.1	Protein of unknown function	0	0	0	16	0	0	0	0	0	0	0	0	0	0	0	0	0	0	0	0	0	0	0	16
SMEL3Ch06	96341441	96343988	SMEL_006g258260.1	Similar to RPL15: 60S ribosomal protein L15 (Petunia hybrida OX%3D4102)	0	0	1	10	0	0	0	0	0	0	0	0	0	0	0	0	0	0	0	0	0	0	1	10
SMEL3Ch06	96346107	96360788	SMEL_006g258270.1	Similar to CWINV3: Beta-fructofuranosidase%2C insoluble isoenzyme CWINV3 (Arabidopsis thaliana OX%3D3702)	0	0	0	2	0	0	0	0	0	0	0	0	0	1	0	0	0	0	0	0	0	0	0	1
SMEL3Ch06	96369136	96370971	SMEL_006g258290.1	Similar to PCMP-H69: Pentatricopeptide repeat-containing protein At1g56690%2C mitochondrial (Arabidopsis thaliana OX%3D3702)	0	0	0	2	0	0	0	0	0	0	0	0	0	0	0	0	0	0	0	0	0	0	0	2
SMEL3Ch06	96414431	96427305	SMEL_006g258340.1	Similar to AKHSDH2: Bifunctional aspartokinase/homoserine dehydrogenase 2%2C chloroplastic (Arabidopsis thaliana OX%3D3702)	0	0	0	1	0	0	0	0	0	0	0	0	0	0	0	0	0	0	0	0	0	0	0	1
SMEL3Ch06	96435243	96436314	SMEL_006g258350.1	Similar to LBD24: LOB domain-containing protein 24 (Arabidopsis thaliana OX%3D3702)	0	0	0	2	0	0	0	0	0	0	0	1	0	0	0	0	0	0	0	0	0	0	0	1
SMEL3Ch06	96440596	96442483	SMEL_006g258360.1	Similar to MAN2: Mannan endo-1%2C4-beta-mannosidase 2 (Solanum lycopersicum OX%3D4081)	0	0	0	1	0	0	0	0	0	0	0	1	0	0	0	0	0	0	0	0	0	0	0	0
SMEL3Ch06	96448938	96450670	SMEL_006g258380.1	Similar to MAN2: Mannan endo-1%2C4-beta-mannosidase 2 (Solanum lycopersicum OX%3D4081)	0	0	3	12	0	0	0	0	0	0	0	6	0	1	0	0	0	0	0	0	0	0	3	5
SMEL3Ch06	96472084	96473885	SMEL_006g258390.1	Similar to MAN2: Mannan endo-1%2C4-beta-mannosidase 2 (Solanum lycopersicum OX%3D4081)	0	0	1	9	0	0	0	0	0	0	0	1	0	7	0	0	0	0	0	0	0	0	1	1
SMEL3Ch06	96481608	96484404	SMEL_006g258400.1	Similar to MAN2: Mannan endo-1%2C4-beta-mannosidase 2 (Solanum lycopersicum OX%3D4081)	0	0	0	1	0	0	0	0	0	0	0	1	0	0	0	0	0	0	0	0	0	0	0	0
SMEL3Ch06	96535632	96536829	SMEL_006g258420.1	Similar to ROMT: Trans-resveratrol di-O-methyltransferase (Vitis vinifera OX%3D29760)	0	0	0	6	0	0	0	0	0	0	0	5	0	0	0	0	0	0	0	0	0	0	0	1
SMEL3Ch06	96610759	96636548	SMEL_006g258490.1	Protein of unknown function	0	0	0	1	0	0	0	0	0	0	0	0	0	1	0	0	0	0	0	0	0	0	0	0
SMEL3Ch06	96638959	96652771	SMEL_006g258500.1	Similar to CLPX3: CLP protease regulatory subunit CLPX3%2C mitochondrial (Arabidopsis thaliana OX%3D3702)	0	0	0	5	0	0	0	0	0	0	0	5	0	0	0	0	0	0	0	0	0	0	0	0
SMEL3Ch06	96679349	96679609	SMEL_006g258520.1	Similar to At5g49610: F-box protein At5g49610 (Arabidopsis thaliana OX%3D3702)	0	0	0	6	0	0	0	0	0	0	0	0	0	0	0	0	0	0	0	0	0	0	0	6
SMEL3Ch06	96687829	96690548	SMEL_006g258530.1	Similar to CYP98A2: Cytochrome P450 98A2 (Glycine max OX%3D3847)	0	0	0	2	0	0	0	0	0	0	0	2	0	0	0	0	0	0	0	0	0	0	0	0
SMEL3Ch06	96703291	96704137	SMEL_006g258540.1	Similar to At3g08750: F-box protein At3g08750 (Arabidopsis thaliana OX%3D3702)	0	0	0	4	0	0	0	0	0	0	0	4	0	0	0	0	0	0	0	0	0	0	0	0
SMEL3Ch06	96705388	96707596	SMEL_006g258550.1	Similar to LHCB5: Chlorophyll a-b binding protein CP26%2C chloroplastic (Arabidopsis thaliana OX%3D3702)	0	0	0	2	0	0	0	0	0	0	0	0	0	0	0	0	0	0	0	0	0	0	0	2
SMEL3Ch06	96842314	96857496	SMEL_006g258690.1	Similar to TAF5: Transcription initiation factor TFIID subunit 5 (Arabidopsis thaliana OX%3D3702)	0	0	0	2	0	0	0	0	0	0	0	0	0	2	0	0	0	0	0	0	0	0	0	0
SMEL3Ch06	96858030	96880091	SMEL_006g258700.1	Similar to TAF5: Transcription initiation factor TFIID subunit 5 (Arabidopsis thaliana OX%3D3702)	0	0	0	12	0	0	0	0	0	0	0	2	0	8	0	0	0	0	0	0	0	0	0	2
SMEL3Ch06	96939523	96949745	SMEL_006g258730.1	Similar to ABCG32: ABC transporter G family member 32 (Arabidopsis thaliana OX%3D3702)	0	0	0	32	5	0	0	0	0	0	0	22	0	5	0	0	0	0	0	0	0	0	0	0
SMEL3Ch06	96954079	96955035	SMEL_006g258750.1	Similar to MAPKKK17: Mitogen-activated protein kinase kinase kinase 17 (Arabidopsis thaliana OX%3D3702)	0	0	0	28	0	0	0	0	0	0	0	27	0	0	0	0	0	0	0	0	0	0	0	1
SMEL3Ch06	96956919	96957578	SMEL_006g258760.1	Similar to At5g11310: Pentatricopeptide repeat-containing protein At5g11310%2C mitochondrial (Arabidopsis thaliana OX%3D3702)	0	0	0	10	0	0	0	0	0	0	0	1	0	0	0	0	0	0	0	0	0	0	0	9
SMEL3Ch06	96959477	96960433	SMEL_006g258770.1	Similar to MAPKKK17: Mitogen-activated protein kinase kinase kinase 17 (Arabidopsis thaliana OX%3D3702)	0	0	0	1	0	0	0	0	0	0	0	1	0	0	0	0	0	0	0	0	0	0	0	0
SMEL3Ch06	96962281	96972424	SMEL_006g258780.1	Similar to At5g11310: Pentatricopeptide repeat-containing protein At5g11310%2C mitochondrial (Arabidopsis thaliana OX%3D3702)	0	0	0	3	0	0	0	0	0	0	0	2	0	0	0	0	0	0	0	0	0	0	0	1
SMEL3Ch06	96972920	96982427	SMEL_006g258790.1	Similar to TIFY8: Protein TIFY 8 (Arabidopsis thaliana OX%3D3702)	0	0	0	2	0	0	0	0	0	0	0	0	0	2	0	0	0	0	0	0	0	0	0	0
SMEL3Ch06	97070961	97073731	SMEL_006g258810.1	Similar to YUC4: Probable indole-3-pyruvate monooxygenase YUCCA4 (Arabidopsis thaliana OX%3D3702)	0	0	0	7	0	0	0	0	0	0	0	7	0	0	0	0	0	0	0	0	0	0	0	0
SMEL3Ch06	97101793	97110786	SMEL_006g258820.1	Similar to MTOPVIB: Type 2 DNA topoisomerase 6 subunit B-like (Arabidopsis thaliana OX%3D3702)	0	0	0	1	0	0	0	0	0	0	0	1	0	0	0	0	0	0	0	0	0	0	0	0
SMEL3Ch06	97111782	97117375	SMEL_006g258830.1	Similar to Os06g0597200: Probable protein phosphatase 2C 57 (Oryza sativa subsp. japonica OX%3D39947)	0	0	0	13	0	0	0	0	0	0	0	0	0	0	0	0	0	0	0	0	0	0	0	13
SMEL3Ch06	97121343	97121696	SMEL_006g258840.1	Similar to LSAT_1X82001: Non-specific lipid-transfer protein Lac s 1 (Lactuca sativa OX%3D4236)	0	0	0	14	0	0	0	0	0	0	0	13	0	0	0	0	0	0	0	0	0	0	0	1
SMEL3Ch06	97124655	97126960	SMEL_006g258850.1	Similar to RPL18A: 60S ribosomal protein L18a (Castanea sativa OX%3D21020)	0	0	0	1	0	0	0	0	0	0	0	0	0	1	0	0	0	0	0	0	0	0	0	0
SMEL3Ch06	97127522	97139481	SMEL_006g258860.1	Similar to UKL1: Uridine kinase-like protein 1%2C chloroplastic (Arabidopsis thaliana OX%3D3702)	0	0	0	1	0	0	0	0	0	0	0	0	0	0	0	0	0	0	0	0	0	0	0	1
SMEL3Ch06	97159140	97160678	SMEL_006g258880.1	Similar to KCS11: 3-ketoacyl-CoA synthase 11 (Arabidopsis thaliana OX%3D3702)	0	0	0	5	0	0	0	0	0	0	0	0	0	0	0	0	0	0	0	0	0	0	0	5
SMEL3Ch06	97211532	97211957	SMEL_006g258910.1	Protein of unknown function	0	0	0	2	0	0	0	0	0	0	0	2	0	0	0	0	0	0	0	0	0	0	0	0
SMEL3Ch06	97255284	97256240	SMEL_006g258950.1	Similar to MAPKKK17: Mitogen-activated protein kinase kinase kinase 17 (Arabidopsis thaliana OX%3D3702)	0	0	0	5	0	0	0	0	0	0	0	0	0	0	0	0	0	0	0	0	0	0	0	5
SMEL3Ch06	97259782	97262499	SMEL_006g258960.1	Similar to ABCG32: ABC transporter G family member 32 (Arabidopsis thaliana OX%3D3702)	0	0	0	19	0	0	0	0	0	0	0	0	0	0	0	0	0	0	0	0	0	0	0	19
SMEL3Ch06	97269033	97277272	SMEL_006g258970.1	Similar to PRORP3: Proteinaceous RNase P 3 (Arabidopsis thaliana OX%3D3702)	0	0	0	35	0	0	0	0	0	0	0	0	0	17	0	0	0	0	0	0	0	0	0	18
SMEL3Ch06	97396651	97425164	SMEL_006g259120.1	Protein of unknown function	0	0	0	1	0	0	0	0	0	0	0	0	0	1	0	0	0	0	0	0	0	0	0	0
SMEL3Ch06	97470303	97470983	SMEL_006g259130.1	Protein of unknown function	0	0	0	16	0	0	0	0	0	0	0	0	0	0	0	0	0	0	0	0	0	0	0	16
SMEL3Ch06	97511769	97517891	SMEL_006g259150.1	Similar to RMR2: Receptor homology region%2C transmembrane domain- and RING domain-containing protein 2 (Arabidopsis thaliana OX%3D3702)	0	0	0	46	0	0	0	0	0	0	0	0	0	0	0	0	0	0	0	0	0	0	0	46
SMEL3Ch06	97569618	97573102	SMEL_006g259220.1	Protein of unknown function	0	0	0	9	0	0	0	0	0	0	0	9	0	0	0	0	0	0	0	0	0	0	0	0
SMEL3Ch06	97592935	97599373	SMEL_006g259230.1	Similar to FUT13: Alpha-(1%2C4)-fucosyltransferase (Arabidopsis thaliana OX%3D3702)	0	0	0	1	0	0	0	0	0	0	0	0	0	1	0	0	0	0	0	0	0	0	0	0
SMEL3Ch06	97600265	97603732	SMEL_006g259240.1	Similar to NAA20: N-terminal acetyltransferase B complex catalytic subunit NAA20 (Arabidopsis thaliana OX%3D3702)	0	0	0	15	0	0	0	0	0	0	0	0	0	0	0	0	0	0	0	0	0	0	0	15
SMEL3Ch06	97612294	97612590	SMEL_006g259250.1	Similar to SAUR50: Auxin-responsive protein SAUR50 (Arabidopsis thaliana OX%3D3702)	0	0	0	11	0	0	0	0	0	0	0	0	0	0	0	0	0	0	0	0	0	0	0	11
SMEL3Ch06	97634003	97634335	SMEL_006g259270.1	Protein of unknown function	0	0	0	3	0	0	0	0	0	0	0	0	0	0	0	0	0	0	0	0	0	0	0	3
SMEL3Ch06	97636696	97644017	SMEL_006g259280.1	Similar to CINV2: Alkaline/neutral invertase CINV2 (Arabidopsis thaliana OX%3D3702)	0	0	0	3	0	0	0	0	0	0	0	0	0	3	0	0	0	0	0	0	0	0	0	0
SMEL3Ch06	97648064	97652374	SMEL_006g259290.1	Protein of unknown function	0	0	0	1	0	0	0	0	0	0	0	1	0	0	0	0	0	0	0	0	0	0	0	0
SMEL3Ch06	97658581	97659555	SMEL_006g259300.1	Similar to TCP8: Transcription factor TCP8 (Arabidopsis thaliana OX%3D3702)	0	0	0	1	0	0	0	0	0	0	0	0	0	0	0	0	0	0	0	0	0	0	0	1
SMEL3Ch06	97676564	97682012	SMEL_006g259330.1	Similar to VPS11: Vacuolar protein-sorting-associated protein 11 homolog (Arabidopsis thaliana OX%3D3702)	0	0	0	1	0	0	0	0	0	0	0	0	0	0	0	0	0	0	0	0	0	0	0	1
SMEL3Ch06	97693888	97697972	SMEL_006g259340.1	Similar to N: TMV resistance protein N (Nicotiana glutinosa OX%3D35889)	0	0	1	16	0	0	0	0	0	0	0	4	0	0	0	0	0	0	0	0	0	0	1	12
SMEL3Ch06	97790856	97798060	SMEL_006g259410.1	Similar to PHL7: Myb family transcription factor PHL7 (Arabidopsis thaliana OX%3D3702)	0	0	0	2	0	0	0	0	0	0	0	0	0	2	0	0	0	0	0	0	0	0	0	0
SMEL3Ch06	97913786	97916403	SMEL_006g259440.1	Similar to At5g44440: Berberine bridge enzyme-like 28 (Arabidopsis thaliana OX%3D3702)	0	0	0	12	0	0	0	0	0	0	0	10	0	0	0	0	0	0	0	0	0	0	0	2
SMEL3Ch06	97918172	97921573	SMEL_006g259450.1	Similar to At5g44440: Berberine bridge enzyme-like 28 (Arabidopsis thaliana OX%3D3702)	0	0	0	17	0	0	0	0	0	0	0	6	0	11	0	0	0	0	0	0	0	0	0	0
SMEL3Ch06	97928704	97930302	SMEL_006g259460.1	Similar to At5g44440: Berberine bridge enzyme-like 28 (Arabidopsis thaliana OX%3D3702)	0	0	0	4	0	0	0	0	0	0	0	3	0	0	0	0	0	0	0	0	0	0	0	1
SMEL3Ch06	97948146	97950387	SMEL_006g259470.1	Protein of unknown function	0	0	0	1	0	0	0	0	0	0	0	0	0	0	0	0	0	0	0	0	0	0	0	1
SMEL3Ch06	97973235	97981330	SMEL_006g259500.1	Similar to TMN1: Transmembrane 9 superfamily member 1 (Arabidopsis thaliana OX%3D3702)	0	0	0	8	0	0	0	0	0	0	0	8	0	0	0	0	0	0	0	0	0	0	0	0
SMEL3Ch06	97982744	97991740	SMEL_006g259510.1	Similar to NPF5.10: Protein NRT1/ PTR FAMILY 5.10 (Arabidopsis thaliana OX%3D3702)	0	0	0	8	0	0	0	0	0	0	0	0	0	2	0	0	0	0	0	0	0	0	0	6
SMEL3Ch06	97992520	98002502	SMEL_006g259520.1	Similar to GLIP2: GDSL esterase/lipase 2 (Arabidopsis thaliana OX%3D3702)	0	0	0	65	0	0	0	0	0	0	0	0	0	1	0	0	0	0	0	0	0	0	0	64
SMEL3Ch06	98030661	98032274	SMEL_006g259530.1	Similar to Pectinesterase/pectinesterase inhibitor PPE8B (Prunus persica OX%3D3760)	0	0	0	11	0	0	0	0	0	0	0	0	0	0	0	0	0	0	0	0	0	0	0	11
SMEL3Ch06	98032756	98033352	SMEL_006g259540.1	Similar to CYP71D7: Cytochrome P450 71D7 (Solanum chacoense OX%3D4108)	0	0	0	11	0	0	0	0	0	0	0	0	0	0	0	0	0	0	0	0	0	0	0	11
SMEL3Ch06	98036515	98039320	SMEL_006g259550.1	Similar to PATL5: Patellin-5 (Arabidopsis thaliana OX%3D3702)	0	0	0	1	0	0	0	0	0	0	0	1	0	0	0	0	0	0	0	0	0	0	0	0
SMEL3Ch06	98045975	98048326	SMEL_006g259560.1	Similar to IAN9: Immune-associated nucleotide-binding protein 9 (Arabidopsis thaliana OX%3D3702)	0	0	0	18	0	0	0	0	0	0	0	5	0	0	0	0	0	0	0	0	0	0	0	13
SMEL3Ch06	98058434	98064506	SMEL_006g259570.1	Protein of unknown function	0	0	0	40	0	0	0	0	0	0	0	34	0	0	0	0	0	0	0	0	0	0	0	6
SMEL3Ch06	98075528	98080440	SMEL_006g259580.1	Protein of unknown function	0	0	0	5	0	0	0	0	0	0	0	0	0	0	0	0	0	0	0	0	0	0	0	5
SMEL3Ch06	98084748	98087258	SMEL_006g259590.1	Similar to MAN2: Mannan endo-1%2C4-beta-mannosidase 2 (Solanum lycopersicum OX%3D4081)	0	0	1	10	0	0	0	0	0	0	0	0	0	1	0	0	0	0	0	0	0	0	1	9
SMEL3Ch06	98088032	98088868	SMEL_006g259600.1	Similar to NAC078: NAC domain-containing protein 78 (Arabidopsis thaliana OX%3D3702)	0	0	0	11	0	0	0	0	0	0	0	9	0	0	0	0	0	0	0	0	0	0	0	2
SMEL3Ch06	98096855	98097153	SMEL_006g259620.1	Similar to PAT12: Probable protein S-acyltransferase 12 (Arabidopsis thaliana OX%3D3702)	0	0	0	8	0	0	0	0	0	0	0	5	0	0	0	0	0	0	0	0	0	0	0	3
SMEL3Ch06	98109427	98112641	SMEL_006g259660.1	Similar to R1B-17: Putative late blight resistance protein homolog R1B-17 (Solanum demissum OX%3D50514)	0	0	0	17	0	0	0	0	0	0	0	17	0	0	0	0	0	0	0	0	0	0	0	0
SMEL3Ch06	98382019	98387857	SMEL_006g259670.1	Similar to BHLH68: Transcription factor bHLH68 (Arabidopsis thaliana OX%3D3702)	0	0	0	1	0	0	0	0	0	0	0	1	0	0	0	0	0	0	0	0	0	0	0	0
SMEL3Ch06	98409075	98421111	SMEL_006g259700.1	Protein of unknown function	0	0	0	39	0	0	0	0	0	0	0	0	0	0	0	0	0	0	0	0	0	0	0	39
SMEL3Ch06	98457972	98459469	SMEL_006g259730.1	Similar to PDR2: Pleiotropic drug resistance protein 2 (Nicotiana plumbaginifolia OX%3D4092)	0	0	0	6	0	0	0	0	0	0	0	1	0	0	0	0	0	0	0	0	0	0	0	5
SMEL3Ch06	98467242	98467909	SMEL_006g259740.1	Protein of unknown function	0	0	1	0	0	0	0	0	0	0	0	0	0	0	0	0	0	0	0	0	0	0	1	0
SMEL3Ch06	98470847	98471509	SMEL_006g259750.1	Protein of unknown function	0	0	0	1	0	0	0	0	0	0	0	0	0	0	0	0	0	0	0	0	0	0	0	1
SMEL3Ch06	98494844	98495506	SMEL_006g259770.1	Protein of unknown function	0	0	0	36	0	0	0	0	0	0	0	36	0	0	0	0	0	0	0	0	0	0	0	0
SMEL3Ch06	98512963	98513535	SMEL_006g259780.1	Protein of unknown function	0	0	0	2	0	0	0	0	0	0	0	1	0	0	0	0	0	0	0	0	0	0	0	1
SMEL3Ch06	96301012	96302100	SMEL_006g258220.1	Similar to R1C-3: Putative late blight resistance protein homolog R1C-3 (Solanum demissum OX%3D50514)
SMEL3Ch06	96311462	96316914	SMEL_006g258230.1	Similar to At1g54610: Probable serine/threonine-protein kinase At1g54610 (Arabidopsis thaliana OX%3D3702)
SMEL3Ch06	96319258	96322386	SMEL_006g258240.1	Similar to HSD5: 11-beta-hydroxysteroid dehydrogenase-like 5 (Arabidopsis thaliana OX%3D3702)
SMEL3Ch06	96366105	96366425	SMEL_006g258280.1	Protein of unknown function
SMEL3Ch06	96383837	96385370	SMEL_006g258300.1	Similar to BHLH25: Transcription factor bHLH25 (Arabidopsis thaliana OX%3D3702)
SMEL3Ch06	96391448	96394061	SMEL_006g258310.1	Similar to BHLH18: Transcription factor bHLH18 (Arabidopsis thaliana OX%3D3702)
SMEL3Ch06	96400877	96407400	SMEL_006g258320.1	Protein of unknown function
SMEL3Ch06	96410955	96413582	SMEL_006g258330.1	Similar to PTD: Protein PARTING DANCERS (Arabidopsis thaliana OX%3D3702)
SMEL3Ch06	96499533	96499874	SMEL_006g258410.1	Protein of unknown function
SMEL3Ch06	96557356	96561448	SMEL_006g258430.1	Similar to At5g03795: Probable glycosyltransferase At5g03795 (Arabidopsis thaliana OX%3D3702)
SMEL3Ch06	96566306	96569016	SMEL_006g258440.1	Similar to RPL7AB: 60S ribosomal protein L7a-2 (Arabidopsis thaliana OX%3D3702)
SMEL3Ch06	96571081	96576281	SMEL_006g258450.1	Protein of unknown function
SMEL3Ch06	96585370	96589170	SMEL_006g258460.1	Similar to ATL7: RING-H2 finger protein ATL7 (Arabidopsis thaliana OX%3D3702)
SMEL3Ch06	96591486	96592949	SMEL_006g258470.1	Similar to PHYL1.1: Phytolongin Phyl1.1 (Arabidopsis thaliana OX%3D3702)
SMEL3Ch06	96605286	96608963	SMEL_006g258480.1	Similar to BRN2: Protein BEARSKIN2 (Arabidopsis thaliana OX%3D3702)
SMEL3Ch06	96708796	96719486	SMEL_006g258560.1	Similar to SRF5: Protein STRUBBELIG-RECEPTOR FAMILY 5 (Arabidopsis thaliana OX%3D3702)
SMEL3Ch06	96721756	96723862	SMEL_006g258570.1	Similar to RTNLB22: Reticulon-like protein B22 (Arabidopsis thaliana OX%3D3702)
SMEL3Ch06	96725007	96726652	SMEL_006g258580.1	Protein of unknown function
SMEL3Ch06	96729064	96734111	SMEL_006g258590.1	Protein of unknown function
SMEL3Ch06	96739660	96742170	SMEL_006g258600.1	Protein of unknown function
SMEL3Ch06	96745377	96748227	SMEL_006g258610.1	Protein of unknown function
SMEL3Ch06	96748408	96749495	SMEL_006g258620.1	Protein of unknown function
SMEL3Ch06	96751123	96754878	SMEL_006g258630.1	Similar to At1g51550: F-box/kelch-repeat protein At1g51550 (Arabidopsis thaliana OX%3D3702)
SMEL3Ch06	96757320	96763162	SMEL_006g258640.1	Protein of unknown function
SMEL3Ch06	96766687	96767475	SMEL_006g258650.1	Similar to BBX32: B-box zinc finger protein 32 (Arabidopsis thaliana OX%3D3702)
SMEL3Ch06	96837562	96841151	SMEL_006g258680.1	Similar to EBF2: EIN3-binding F-box protein 2 (Arabidopsis thaliana OX%3D3702)
SMEL3Ch06	96895772	96900948	SMEL_006g258710.1	Similar to B'KAPPA: Serine/threonine protein phosphatase 2A 57 kDa regulatory subunit B' kappa isoform (Arabidopsis thaliana OX%3D3702)
SMEL3Ch06	96905369	96913648	SMEL_006g258720.1	Similar to CYCA2-1: Cyclin-A2-1 (Oryza sativa subsp. japonica OX%3D39947)
SMEL3Ch06	96997513	97011432	SMEL_006g258800.1	Similar to LUG: Transcriptional corepressor LEUNIG (Arabidopsis thaliana OX%3D3702)
SMEL3Ch06	97140849	97145316	SMEL_006g258870.1	Similar to MCC1: Histone acetyltransferase MCC1 (Arabidopsis thaliana OX%3D3702)
SMEL3Ch06	97173603	97183108	SMEL_006g258890.1	Similar to CjBAp12: EG45-like domain containing protein (Citrus jambhiri OX%3D64884)
SMEL3Ch06	97198342	97208259	SMEL_006g258900.1	Similar to FAB1D: Putative 1-phosphatidylinositol-3-phosphate 5-kinase FAB1D (Arabidopsis thaliana OX%3D3702)
SMEL3Ch06	97222140	97229080	SMEL_006g258920.1	Similar to At1g29670: GDSL esterase/lipase At1g29670 (Arabidopsis thaliana OX%3D3702)
SMEL3Ch06	97231618	97240657	SMEL_006g258930.1	Similar to CCT7: T-complex protein 1 subunit eta (Arabidopsis thaliana OX%3D3702)
SMEL3Ch06	97279974	97284109	SMEL_006g258980.1	Similar to PPD6: PsbP domain-containing protein 6%2C chloroplastic (Arabidopsis thaliana OX%3D3702)
SMEL3Ch06	97285633	97294654	SMEL_006g258990.1	Similar to PTP1: Protein-tyrosine-phosphatase PTP1 (Arabidopsis thaliana OX%3D3702)
SMEL3Ch06	97297172	97302793	SMEL_006g259000.1	Similar to Y14: RNA-binding protein Y14 (Arabidopsis thaliana OX%3D3702)
SMEL3Ch06	97304936	97318282	SMEL_006g259010.1	Protein of unknown function
SMEL3Ch06	97319087	97320708	SMEL_006g259020.1	Similar to PS1: FHA domain-containing protein PS1 (Arabidopsis thaliana OX%3D3702)
SMEL3Ch06	97322114	97324385	SMEL_006g259030.1	Similar to PS1: FHA domain-containing protein PS1 (Arabidopsis thaliana OX%3D3702)
SMEL3Ch06	97325108	97330444	SMEL_006g259040.1	Similar to STOP1: Protein SENSITIVE TO PROTON RHIZOTOXICITY 1 (Arabidopsis thaliana OX%3D3702)
SMEL3Ch06	97332931	97336105	SMEL_006g259050.1	Similar to CYP716A15: Beta-amyrin 28-monooxygenase (Vitis vinifera OX%3D29760)
SMEL3Ch06	97342622	97345016	SMEL_006g259060.1	Similar to CYP716A17: Beta-amyrin 28-monooxygenase (Vitis vinifera OX%3D29760)
SMEL3Ch06	97346610	97350523	SMEL_006g259070.1	Similar to NAC030: NAC domain-containing protein 30 (Arabidopsis thaliana OX%3D3702)
SMEL3Ch06	97372850	97378965	SMEL_006g259080.1	Similar to At4g09580: Uncharacterized membrane protein At4g09580 (Arabidopsis thaliana OX%3D3702)
SMEL3Ch06	97379191	97382323	SMEL_006g259090.1	Similar to RPL21: 50S ribosomal protein L21%2C chloroplastic (Arabidopsis thaliana OX%3D3702)
SMEL3Ch06	97383223	97387527	SMEL_006g259100.1	Similar to CPK11: Calcium-dependent protein kinase 11 (Arabidopsis thaliana OX%3D3702)
SMEL3Ch06	97391222	97395537	SMEL_006g259110.1	Similar to SBT3.5: Subtilisin-like protease SBT3.5 (Arabidopsis thaliana OX%3D3702)
SMEL3Ch06	97496728	97500270	SMEL_006g259140.1	Protein of unknown function
SMEL3Ch06	97518132	97523019	SMEL_006g259160.1	Similar to PDIL5-2: Protein disulfide-isomerase 5-2 (Arabidopsis thaliana OX%3D3702)
SMEL3Ch06	97526554	97531109	SMEL_006g259170.1	Protein of unknown function
SMEL3Ch06	97541314	97543699	SMEL_006g259180.1	Similar to INH3: Protein phosphatase 1 regulatory subunit INH3 (Arabidopsis thaliana OX%3D3702)
SMEL3Ch06	97546658	97546861	SMEL_006g259190.1	Protein of unknown function
SMEL3Ch06	97548489	97553418	SMEL_006g259200.1	Similar to At5g47840: Adenylate kinase 2%2C chloroplastic (Arabidopsis thaliana OX%3D3702)
SMEL3Ch06	97553703	97558270	SMEL_006g259210.1	Similar to CEPR2: Receptor protein-tyrosine kinase CEPR2 (Arabidopsis thaliana OX%3D3702)
SMEL3Ch06	97616299	97625439	SMEL_006g259260.1	Similar to FSD3: Superoxide dismutase [Fe] 3%2C chloroplastic (Arabidopsis thaliana OX%3D3702)
SMEL3Ch06	97664536	97667146	SMEL_006g259310.1	Protein of unknown function
SMEL3Ch06	97670057	97671114	SMEL_006g259320.1	Similar to VPS11: Vacuolar protein-sorting-associated protein 11 homolog (Arabidopsis thaliana OX%3D3702)
SMEL3Ch06	97766783	97768846	SMEL_006g259370.1	Similar to MYB330: Myb-related protein 330 (Antirrhinum majus OX%3D4151)
SMEL3Ch06	97778398	97779028	SMEL_006g259380.1	Similar to Proteinase inhibitor PSI-1.2 (Capsicum annuum OX%3D4072)
SMEL3Ch06	97780792	97781131	SMEL_006g259390.1	Similar to Proteinase inhibitor PSI-1.2 (Capsicum annuum OX%3D4072)
SMEL3Ch06	97789455	97790418	SMEL_006g259400.1	Similar to Proteinase inhibitor PSI-1.2 (Capsicum annuum OX%3D4072)
SMEL3Ch06	97862775	97863885	SMEL_006g259420.1	Similar to GSO1: LRR receptor-like serine/threonine-protein kinase GSO1 (Arabidopsis thaliana OX%3D3702)
SMEL3Ch06	97889548	97891152	SMEL_006g259430.1	Similar to At5g44440: Berberine bridge enzyme-like 28 (Arabidopsis thaliana OX%3D3702)
SMEL3Ch06	97952106	97954250	SMEL_006g259480.1	Protein of unknown function
SMEL3Ch06	97961406	97965959	SMEL_006g259490.1	Similar to BHLH80: Transcription factor bHLH80 (Arabidopsis thaliana OX%3D3702)
SMEL3Ch06	98393069	98399919	SMEL_006g259680.1	Similar to PEX2: Peroxisome biogenesis protein 2 (Arabidopsis thaliana OX%3D3702)
SMEL3Ch06	98406515	98408098	SMEL_006g259690.1	Similar to TIP2-1: Aquaporin TIP2-1 (Arabidopsis thaliana OX%3D3702)
SMEL3Ch06	98437560	98438114	SMEL_006g259710.1	Similar to DREB3: Dehydration-responsive element-binding protein 3 (Arabidopsis thaliana OX%3D3702)
SMEL3Ch06	98449092	98449667	SMEL_006g259720.1	Protein of unknown function
SMEL3Ch06	98484352	98485026	SMEL_006g259760.1	Protein of unknown function
SMEL3Ch06	98532101	98541201	SMEL_006g259790.1	Similar to PAPS4: Nuclear poly(A) polymerase 4 (Arabidopsis thaliana OX%3D3702)

[truncated: 4 more sheets: P-KSOPH 7.1, P-POLY-UNKN 8, P-ACH 8.1, P-FLAVO - GLYCO 10]
